# Supplementary material
Source: PubMed Central journal article supplement (PMC4248606)
Supplement: NIHMS629158-supplement-1.pdf [file NIHMS629158-supplement-1.pdf]

# Supplementary Information

For

## Bypassing the Limitations of Directed C–H Functionalizations of Heterocycles

Yue-Jin Liu,<sup>1</sup> Hui Xu,<sup>1</sup> Wei-Jun Kong,<sup>1</sup> Ming Shang,<sup>1</sup> Hui-Xiong Dai,<sup>1\*</sup> Jin-Quan Yu<sup>1,2\*</sup>

<sup>1</sup>State Key Laboratory of Organometallic Chemistry, Shanghai Institute of Organic Chemistry, Chinese Academy of Sciences, 345 Lingling Road, Shanghai 200032, China; <sup>2</sup>The Scripps Research Institute, 10550 N. Torrey Pines Road, La Jolla, California 92037, USA.

### CONTENTS:

|                                                                                                                                  |      |
|----------------------------------------------------------------------------------------------------------------------------------|------|
| 1. General Information.....                                                                                                      | S2   |
| 2. Experimental Section.....                                                                                                     | S2   |
| 2.1 Preparation of Substrates .....                                                                                              | S2   |
| 2.2 Optimization of Reaction Conditions.....                                                                                     | S5   |
| 2.3 General Procedure for Directed C–H Functionalizations of Arenes.....                                                         | S8   |
| 2.4 Gram-scale Reaction with 0.5 mol % of Pd <sub>2</sub> (dba) <sub>3</sub> .....                                               | S9   |
| 2.5 Transformation of Product.....                                                                                               | S10  |
| 2.6 The Synthesis of Pd-Complex <b>E</b> .....                                                                                   | S17  |
| 2.7 The Reactions of <b>6a</b> with Pd(OAc) <sub>2</sub> and Pd(TFA) <sub>2</sub> .....                                          | S17  |
| 2.8 Transformation of Pd-Complex <b>F</b> .....                                                                                  | S19  |
| 2.9 The Effect of Heterocycle in Previous Reported C–H Activation Reactions Using<br><i>N</i> -methoxyamide Directing Group..... | S19  |
| 2.10 Reduction of Pd(II) Species in Isocyanides: Experimental Procedure and Photos.....                                          | S22  |
| 3. Analytical Data.....                                                                                                          | S23  |
| 3.1 Characterization of Substrates .....                                                                                         | S23  |
| 3.2 Characterization of Products.....                                                                                            | S33  |
| 4. References.....                                                                                                               | S54  |
| 5. NMR Spectra for New Compounds.....                                                                                            | S56  |
| 6. X-ray Crystallographic Data of Compounds <b>E</b> , <b>F</b> , <b>3a</b> , <b>5i</b> .....                                    | S165 |

## 1. General Information

All solvents and reagents were obtained from commercial sources and were purified according to standard procedures before use. Pd<sub>2</sub>(dba)<sub>3</sub> was obtained from Sigma-Aldrich and *t*-BuNC was obtained from TCI. Carboxylic acids or carboxylic acid chlorides were obtained from Energy Chemical, J&K, TCI, Alfa-Aesar. <sup>1</sup>H and <sup>13</sup>C NMR spectra were recorded on Agilent AV 400, Agilent Mercury 600 (600 MHz and 150 MHz, respectively), Varian Inova 400 (400 MHz and 100 MHz, respectively) instruments. The peaks were internally referenced to TMS (0.00 ppm) or residual undeuterated solvent signal. The following abbreviations were used to explain multiplicities: s = singlet, d = doublet, t = triplet, q = quartet, m = multiplet, and br = broad. High resolution mass spectra were recorded at the Center for Mass Spectrometry, Shanghai Institute of Organic Chemistry.

## 2. Experimental Section

### 2.1 Preparation of Substrates

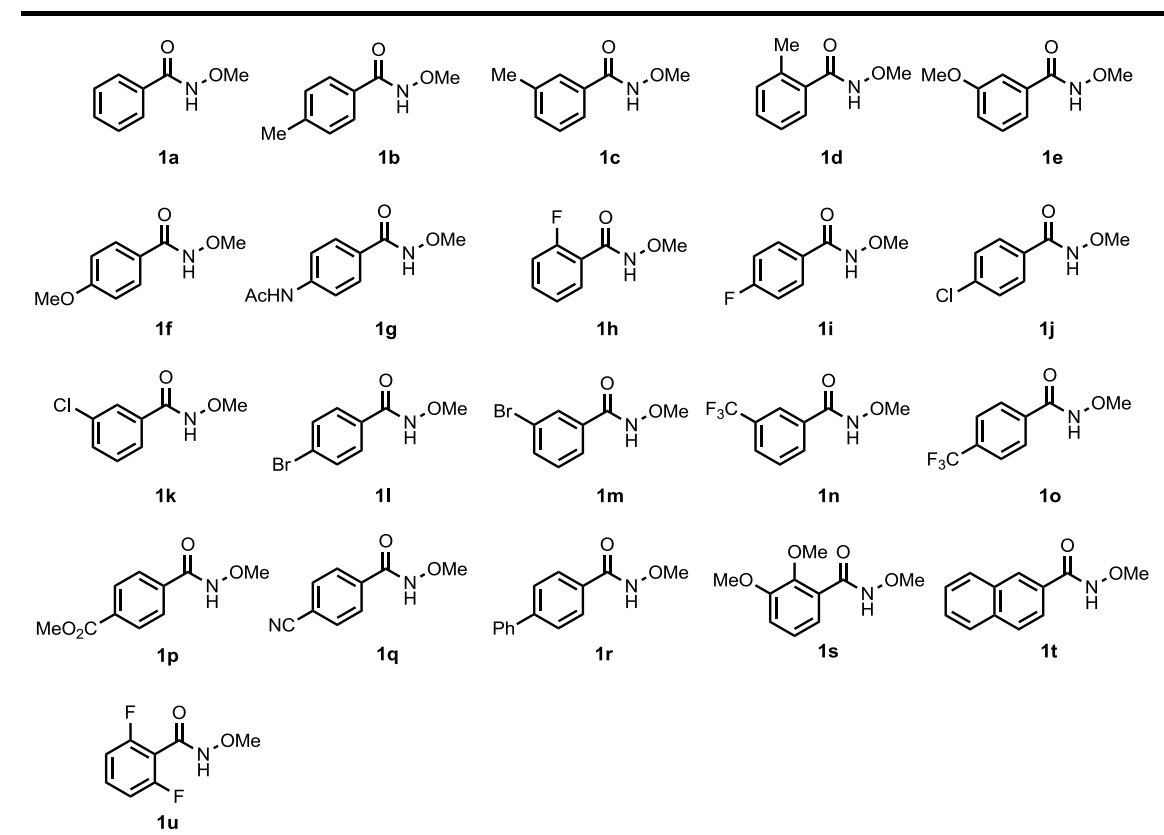

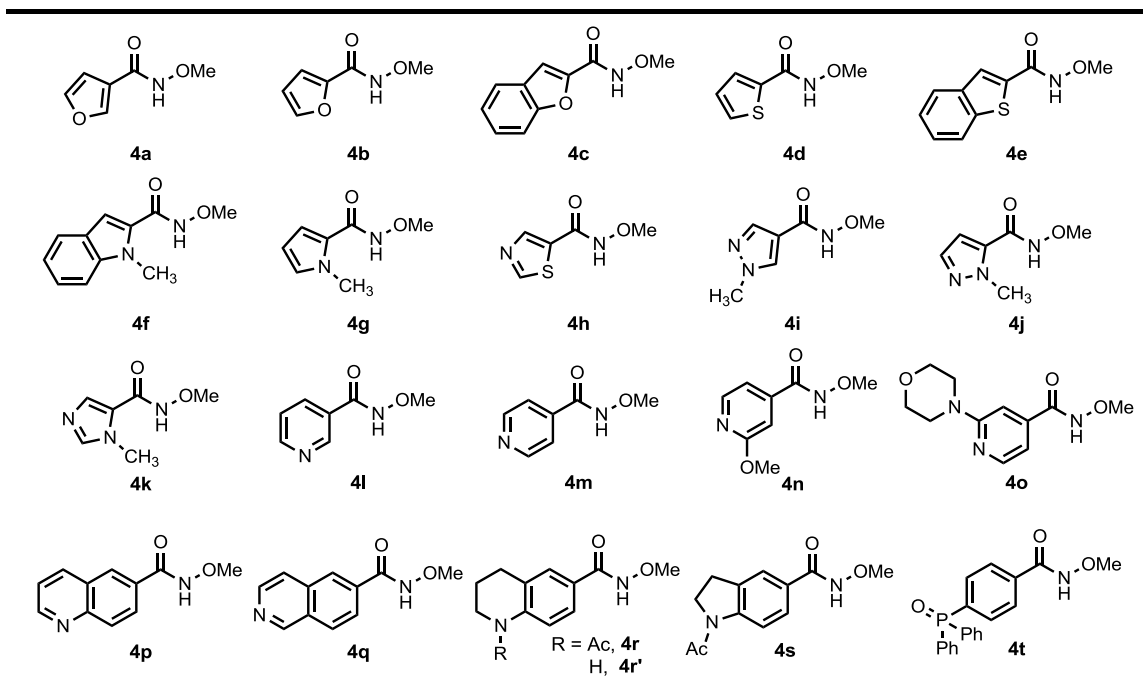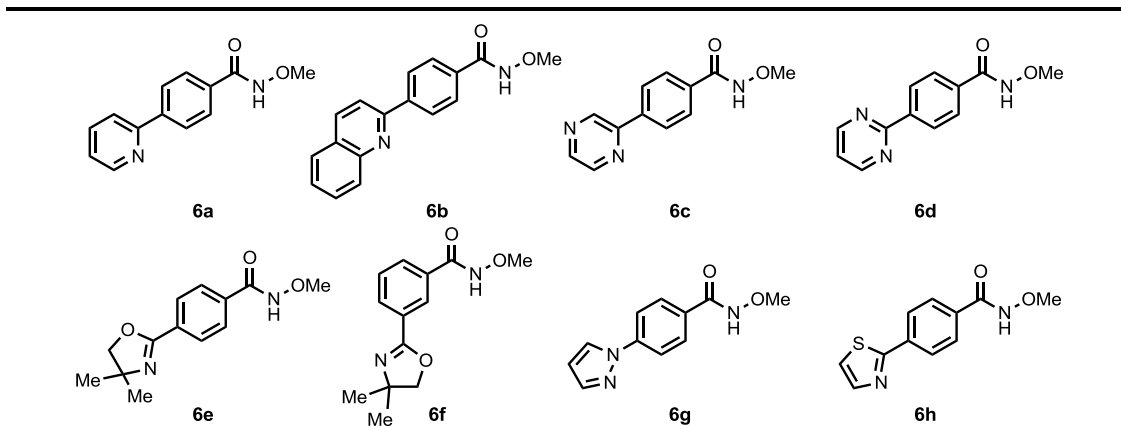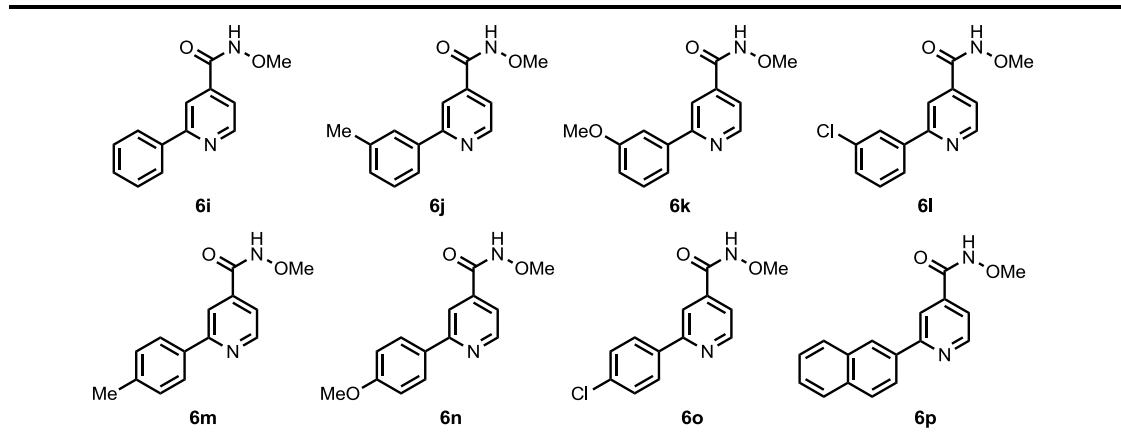

Compounds **1a-1u** and **4t** were prepared following **typical procedure 1**. Compounds **4h-4o**

were prepared following **typical procedure 2**. Compounds **1g**, **4p-4t** and **6a-6p** were prepared following **typical procedure 3**.

**1a-1e**,<sup>1</sup> **1f-1g**,<sup>2</sup> **1h-1j**,<sup>3</sup> **1k**,<sup>4</sup> **1l**,<sup>3</sup> **1m**,<sup>5</sup> **1n**,<sup>1</sup> **1o**,<sup>6</sup> **1p**,<sup>3</sup> **1q**,<sup>7</sup> **1r**,<sup>1</sup> **1t**,<sup>1</sup> **4a-4b**,<sup>8</sup> **4c**,<sup>6</sup> **4d-4g**<sup>9</sup> are known Compounds.

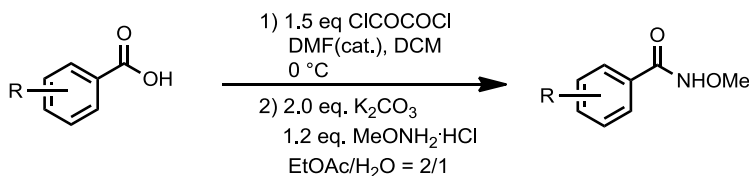

**Typical Procedure 1:** A dried round-bottom flask was charged with the acid (4.5 mmol), DCM (15 mL), and 2 drops of DMF. Then, oxalyl chloride (0.60 mL, d = 1.48, 0.876 g, 6.9 mmol) was added dropwise within 5 min at 0 °C. The resulting mixture was stirred at rt for 3.5 h and concentrated under reduced pressure. The residues was dissolved in EtOAc (40 mL) and K<sub>2</sub>CO<sub>3</sub> (1.24 g, 9.0 mmol), MeONH<sub>2</sub>·HCl (458 mg, 5.4 mmol), water (20 mL) were added sequentially. The resulting mixture was stirred for 20 h at rt and extracted with EtOAc (50 mL). The organic layer was washed with saturated aqueous NaHCO<sub>3</sub> (15 mL × 2), brine (15 mL × 2), and dried over anhydrous Na<sub>2</sub>SO<sub>4</sub>, filtered and concentrated under reduced pressure. The crude product was recrystallized (EtOAc) to afford the product. In the case of an oil, the crude product was purified by silica gel column chromatography, using EtOAc/hexane as the eluent.

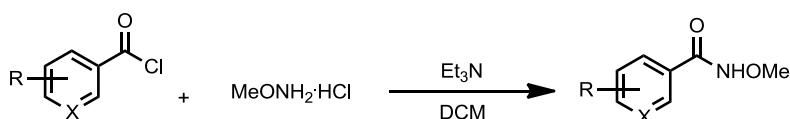

**Typical Procedure 2:** A mixture of methoxyamine hydrochloride (840 mg, 10 mmol) and Et<sub>3</sub>N (3.03 g, 30 mmol) in DCM (20 mL) was stirred at rt for 3 h, and then cooled to 0 °C upon which acyl chloride (10 mmol) was added slowly. The reaction mixture was then allowed to warm to rt and stirred overnight. Upon completion, the solvent was removed under reduced pressure. The residue was diluted with acetone (20 mL), filtered and concentrated under reduced pressure. The crude product was purified by silica gel column chromatography, using EtOAc/hexane as the eluent.



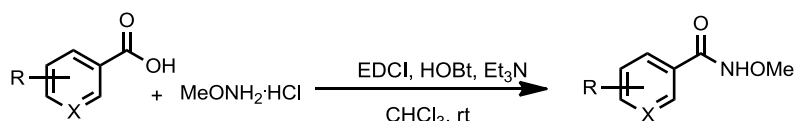

**Typical Procedure 3:** A mixture of acid (3 mmol), methoxylamine hydrochloride (4.5 mmol), EDCI (3.6 mmol) and HOBT (4.2 mmol), Et<sub>3</sub>N (1.3 mL) in CHCl<sub>3</sub> (15 mL) was stirred at rt for 24 h. Upon completion, the mixture was concentrated. The residue was diluted with acetone (20 mL), filtered and concentrated under reduced pressure. The crude product was purified by silica gel column chromatography, using ethyl acetate/hexane as the eluent.

## 2.2 Optimization of Reaction Conditions

**Table S1.** Screening of Pd Sources<sup>a,b</sup>

| Entry           | Catalyst (mol %)                                           | Yield (%)           |
|-----------------|------------------------------------------------------------|---------------------|
| 1               | Pd <sub>2</sub> (dba) <sub>3</sub> (2.5)                   | 94(93) <sup>c</sup> |
| 2 <sup>d</sup>  | Pd <sub>2</sub> (dba) <sub>3</sub> (2.5)                   | trace               |
| 3 <sup>e</sup>  | Pd <sub>2</sub> (dba) <sub>3</sub> (2.5)                   | 37                  |
| 4               | Pd(dba) <sub>2</sub> (5)                                   | 71                  |
| 5               | Pd(OAc) <sub>2</sub> (5)                                   | 49                  |
| 6               | Pd(PPh <sub>3</sub> ) <sub>4</sub> (5)                     | 86                  |
| 7               | PdCl <sub>2</sub> (5)                                      | 0                   |
| 8               | Pd(TFA) <sub>2</sub> (5)                                   | 0                   |
| 9               | Pd(OTf) <sub>2</sub> (CH <sub>3</sub> CN) <sub>4</sub> (5) | 0                   |
| 10 <sup>f</sup> | Pd(TFA) <sub>2</sub> (5)                                   | 0                   |
| 11 <sup>f</sup> | Pd(OTf) <sub>2</sub> (CH <sub>3</sub> CN) <sub>4</sub> (5) | 0                   |
| 12              | [Pd(allyl)Cl] <sub>2</sub> (2.5)                           | 2                   |

<sup>a</sup> Reaction conditions: **1a** (0.1 mmol), **2** (0.15 mmol), 2.5 mol % of Pd<sub>2</sub>(dba)<sub>3</sub>, dioxane (1 mL), 80 °C, air, 30 min. <sup>b</sup> <sup>1</sup>H NMR yield using CH<sub>2</sub>Br<sub>2</sub> as internal standard. <sup>c</sup> Isolated yield in the parenthesis. <sup>d</sup> Ar (1 atm). <sup>e</sup> O<sub>2</sub> (1 atm). <sup>f</sup> **dba** (7.5 mol %).

**Table S2.** Screening of Solvents<sup>a,b</sup>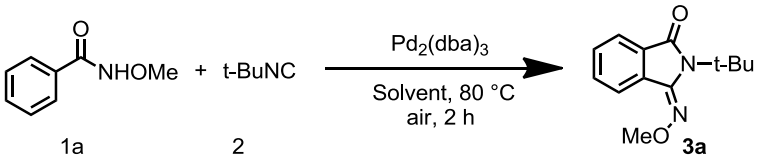

Reaction scheme showing the synthesis of **3a** from **1a** and **2** using  $\text{Pd}_2(\text{dba})_3$  catalyst in a solvent at  $80\text{ }^\circ\text{C}$  under air for 2 h.

| Entry    | Solvent                | Yield (%) |
|----------|------------------------|-----------|
| <b>1</b> | dioxane                | <b>94</b> |
| 2        | THF                    | 67        |
| 3        | $\text{Et}_2\text{O}$  | 35        |
| 4        | DCM                    | 8         |
| 5        | $\text{CH}_3\text{CN}$ | 5         |
| 6        | DMF                    | 6         |
| 7        | $\text{CH}_3\text{OH}$ | 2         |
| 8        | DMSO                   | 5         |
| 9        | Acetone                | 8         |
| 10       | Toluene                | 45        |

<sup>a</sup> Reaction conditions: **1a** (0.1 mmol), **2** (0.15 mmol), 2.5 mol % of  $\text{Pd}_2(\text{dba})_3$ , solvent (1 mL),  $80\text{ }^\circ\text{C}$ , air, 2 h. <sup>b</sup>  $^1\text{H}$  NMR yield using  $\text{CH}_2\text{Br}_2$  as internal standard.

**Table S3.** Effect of Oxygen<sup>a,b</sup>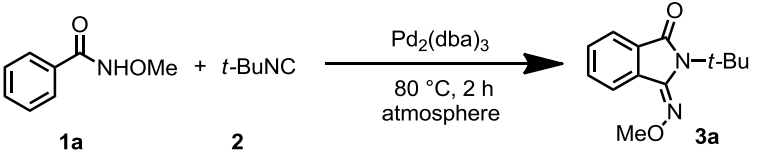

Reaction scheme showing the synthesis of **3a** from **1a** and **2** using  $\text{Pd}_2(\text{dba})_3$  catalyst at  $80\text{ }^\circ\text{C}$  for 2 h under different atmospheres.

| Entry    | atmosphere   | Yield (%) |
|----------|--------------|-----------|
| <b>1</b> | air          | <b>94</b> |
| 2        | $\text{O}_2$ | 48        |
| 3        | Ar           | trace     |

<sup>a</sup> Reaction conditions: **1a** (0.1 mmol), **2** (0.15 mmol), 2.5 mol % of  $\text{Pd}_2(\text{dba})_3$ , dioxane (1 mL),  $80\text{ }^\circ\text{C}$ , 2 h. <sup>b</sup>  $^1\text{H}$  NMR yield using  $\text{CH}_2\text{Br}_2$  as internal standard.

**Table S4.** Screening of Ligands<sup>a,b</sup>
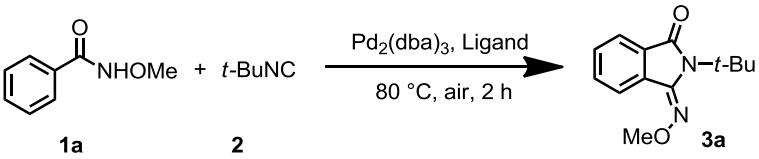

| Entry | Ligand                 | Yield (%) |
|-------|------------------------|-----------|
| 1     | 1,10-phen (10 mol %)   | 96        |
| 2     | bpy (10 mol %)         | 94        |
| 3     | py (20 mol %)          | 93        |
| 4     | Ac-Ile-OH (20 mol %)   | 66        |
| 5     | IMes·HCl (10 mol %)    | 0         |
| 6     | (rac)-BINAP (10 mol %) | 97        |

<sup>a</sup> Reaction conditions: **1a** (0.1 mmol), **2** (0.15 mmol), 2.5 mol % of Pd<sub>2</sub>(dba)<sub>3</sub>, ligand, dioxane (1 mL), 80 °C, air, 2 h. <sup>b</sup> <sup>1</sup>H NMR yield using CH<sub>2</sub>Br<sub>2</sub> as internal standard. 1,10-phen = 1,10-Phenanthroline; bpy = 2,2'-Bipyridine; py = Pyridine; IMes·HCl = 1,3-Bis(2,4,6-trimethylphenyl)imidazolium chloride.

**Table S5.** Screening of Bases<sup>a,b</sup>
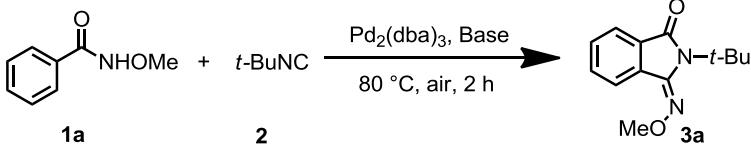

| Entry | Base                            | Yield (%) | Entry | Base                                               | Yield (%) |
|-------|---------------------------------|-----------|-------|----------------------------------------------------|-----------|
| 1     | Li <sub>2</sub> CO <sub>3</sub> | 86        | 9     | KOAc                                               | 82        |
| 2     | Na <sub>2</sub> CO <sub>3</sub> | 94        | 10    | K <sub>3</sub> PO <sub>4</sub> ·3H <sub>2</sub> O  | 34        |
| 3     | K <sub>2</sub> CO <sub>3</sub>  | 92        | 11    | K <sub>2</sub> HPO <sub>4</sub> ·3H <sub>2</sub> O | 86        |
| 4     | Cs <sub>2</sub> CO <sub>3</sub> | 24        | 12    | KH <sub>2</sub> PO <sub>4</sub>                    | 94        |
| 5     | NaHCO <sub>3</sub>              | 84        | 13    | LiCl                                               | 0         |
| 6     | KHCO <sub>3</sub>               | 82        | 14    | NaCl                                               | 96        |
| 7     | NaOAc·H <sub>2</sub> O          | 58        | 15    | NaTFA                                              | 0         |
| 8     | NaOAc                           | 91        | 16    | NaOTf                                              | 0         |

<sup>a</sup> Reaction conditions: **1a** (0.1 mmol), **2** (0.15 mmol), 2.5 mol % of Pd<sub>2</sub>(dba)<sub>3</sub>, Base (0.2 mmol), dioxane (1 mL), 80 °C, air, 2 h. <sup>b</sup> <sup>1</sup>H NMR yield using CH<sub>2</sub>Br<sub>2</sub> as internal standard.

**Table S6.** Evaluation of Pd(II) with Heteroarene **4m**<sup>a</sup>

| Entry | [Pd] (5 mol %)                                         | Yield (%) <sup>b</sup> |
|-------|--------------------------------------------------------|------------------------|
| 1     | PdCl <sub>2</sub>                                      | NR                     |
| 2     | Pd(TFA) <sub>2</sub>                                   | NR                     |
| 3     | Pd(OTf) <sub>2</sub> (CH <sub>3</sub> CN) <sub>4</sub> | NR                     |
| 4     | Pd(OAc) <sub>2</sub>                                   | 40                     |

<sup>a</sup> Reaction conditions: **4m** (0.1 mmol), **2** (0.15 mmol), [Pd] (5 mol %), dioxane (1 mL), 80 °C, air, 4 h. <sup>b</sup> <sup>1</sup>H NMR yield using CH<sub>2</sub>Br<sub>2</sub> as internal standard.

### 2.3 General Procedure for Directed C–H Functionalizations of Arenes

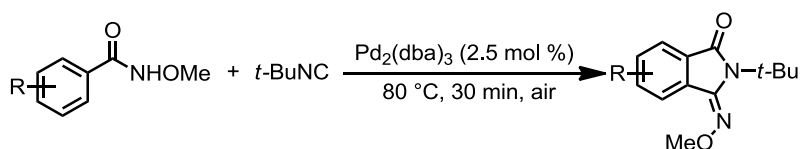

**General Procedure A:** A 25 mL round-bottom flask connected to a reflux condenser was charged with substrate (0.10 mmol, 1.0 equiv), *t*-BuNC **2** (0.15 mmol, 1.5 equiv), Pd<sub>2</sub>(dba)<sub>3</sub> (2.3 mg, 0.0025 mmol, 2.5 mol%), and dioxane (1.0 mL) under air. The reaction flask was then submerged into an oil bath pre-heated to 80 °C. The reaction was stirred for 0.5–11 h and then cooled to room temperature. The solvent was removed under reduced pressure, and the resulting residue was purified by preparative TLC using hexane/EtOAc as the eluent to afford the product.

**General Procedure B:** A 15 mL sealed tube (with a Teflon cap) equipped with a magnetic stir bar was charged with substrate (0.10 mmol, 1.0 equiv), *t*-BuNC **2** (0.15 mmol, 1.5 equiv), Pd<sub>2</sub>(dba)<sub>3</sub> (2.3 mg, 0.0025 mmol, 2.5 mol %), and dioxane (1.0 mL) under air. The tube was then

capped and submerged into a pre-heated 80 °C oil bath and stirred for 0.5 to 11 h. After cooled to rt, the solvent was removed under reduced pressure. The resulting residue was purified by preparative TLC using hexane/EtOAc as the eluent to afford the product.

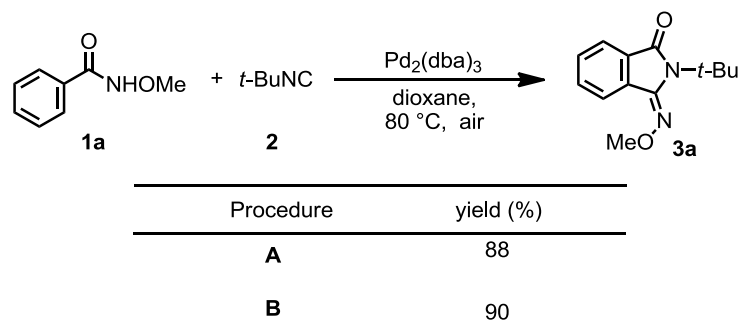

Substrate **1a** followed general procedure **A** and **B**, other substrates followed general procedure **B**.

#### 2.4 Gram-scale Reaction with 0.5 mol % $Pd_2(dba)_3$

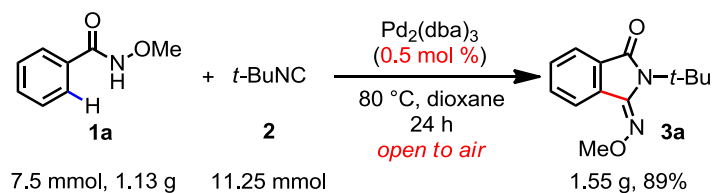

A 250 mL round flask equipped with a magnetic stir bar and condenser was charged with N-methoxybenzamide (1.13 g, 7.5 mmol, 1.0 equiv),  $Pd_2(dba)_3$  (34.3 mg, 0.0375 mmol, 0.5 mmol%), *t*-BuNC **2** (11.25 mmol, 1.35 mL, 1.5 equiv), and dioxane (75 mL). The flask was then submerged into a pre-heated 80 °C oil bath and stirred for 24 h. Upon completion, the reaction vessel was cooled to rt and the solvent was removed under reduced pressure. The resulting residue was purified by chromatography on silica gel using hexane/EtOAc as the eluent to afford the product (1.55 g, 89% yield) as a white amorphous solid.

## 2.5 Transformation of Product

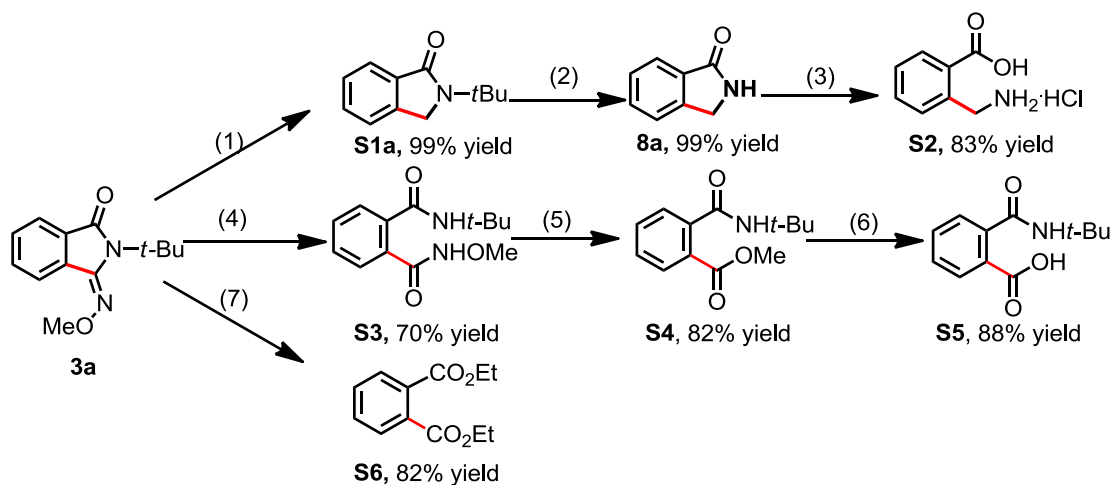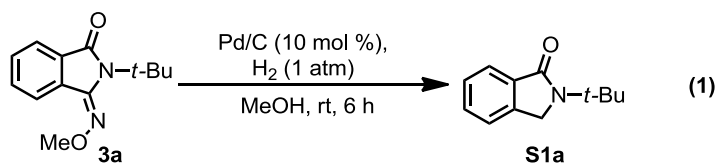

To a 25 mL reaction vessel, **3a** (46.4 mg, 0.2 mmol) and Pd/C (0.02 mmol) were dissolved into MeOH (4.0 mL). The reaction vessel was evacuated and backfilled with H<sub>2</sub> (×3) and the mixture was stirred at room temperature for 6 h. Upon completion, the mixture was filtered through a short silica gel-packed column and washed with MeOH. The solvents were removed under reduced pressure and **S1a** was obtained in 99% yield (38 mg).

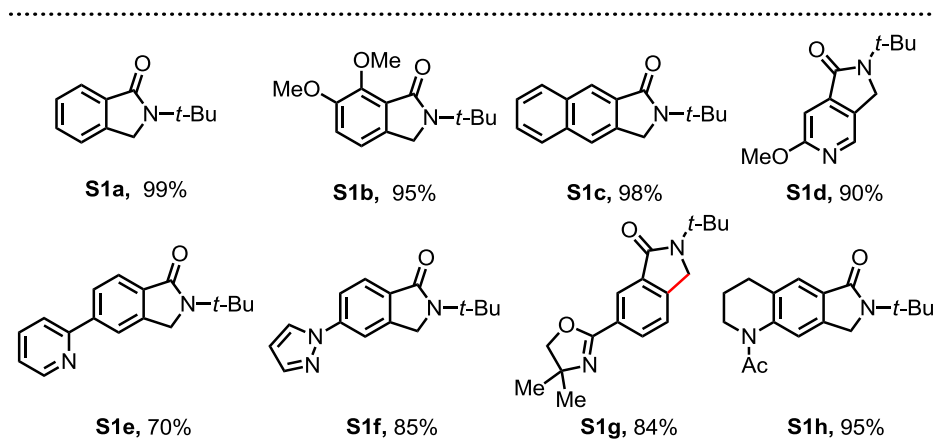

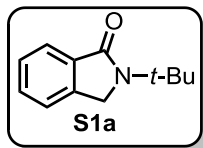

### 2-(tert-butyl)isoindolin-1-one(S1a)<sup>10</sup>

<sup>1</sup>H NMR (400 MHz, CDCl<sub>3</sub>) δ 7.78 (d, *J* = 7.2 Hz, 1H), 7.49 (t, *J* = 7.2 Hz, 1H), 7.44-7.40 (m, 2H), 4.45 (s, 2H), 1.57 (s, 9H); <sup>13</sup>C NMR (100 MHz, CDCl<sub>3</sub>) δ 168.92, 140.73, 134.46, 130.92, 127.85, 123.13, 122.39, 54.38, 48.55, 28.08.

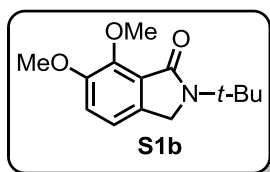

### 2-(tert-butyl)-6,7-dimethoxyisoindolin-1-one (S1b)

The reaction was carried out under 80 atm of H<sub>2</sub> pressure at 80 °C for 24 h. <sup>1</sup>H NMR (400 MHz, CDCl<sub>3</sub>) δ 7.07 (d, *J* = 8.0 Hz, 1H), δ 7.04 (d, *J* = 8.0 Hz, 1H), 4.35 (s, 2H), 4.07 (s, 3H), 3.88 (s, 3H), 1.55 (s, 9H); <sup>13</sup>C NMR (100 MHz, CDCl<sub>3</sub>) δ 167.19, 152.31, 146.86, 134.39, 126.77, 117.57, 116.28, 62.51, 56.91, 54.46, 47.56, 28.07; HRMS (ESI-TOF) *m/z* Calcd for C<sub>14</sub>H<sub>20</sub>NO<sub>3</sub> (M+H)<sup>+</sup>: 250.1438, found: 250.1439.

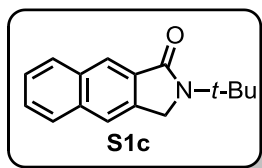

### 2-(tert-butyl)-2,3-dihydro-1H-benzo[f]isoindol-1-one (S1c)

<sup>1</sup>H NMR (400 MHz, CDCl<sub>3</sub>) δ 8.31 (s, 1H), 8.00 (d, *J* = 8.0 Hz, 1H), 7.89 (d, *J* = 8.0 Hz, 1H), 7.83 (s, 1H), 7.57-7.50 (m, 2H), 4.62 (s, 2H), 1.62 (s, 9H); <sup>13</sup>C NMR (100 MHz, CDCl<sub>3</sub>) δ 168.77, 136.07, 135.04, 133.06, 132.62, 129.64, 128.01, 127.38, 126.15, 123.22, 121.17, 54.77, 48.42, 28.17; HRMS (ESI-TOF) *m/z* Calcd for C<sub>15</sub>H<sub>18</sub>N<sub>3</sub>O<sub>2</sub> (M+H)<sup>+</sup>: 240.1383, found: 240.1389.

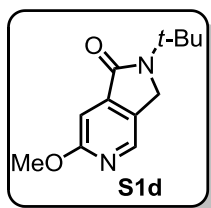

### 2-(tert-butyl)-6-methoxy-2,3-dihydro-1H-pyrrolo[3,4-c]pyridin-1-one (S1d)

The reaction was carried out under 50 atm of H<sub>2</sub> pressure at rt for 24 h. 90% yield; <sup>1</sup>H NMR (400 MHz, CDCl<sub>3</sub>) δ 8.29 (s, 1H), 7.09 (s, 1H), 4.49 (s, 2H), 3.97 (s, 3H), 1.57 (s, 9H); <sup>13</sup>C NMR (100 MHz, CDCl<sub>3</sub>) δ 166.83, 164.43, 145.48, 141.31, 127.89, 104.01, 55.09, 54.24, 46.80, 28.02; **HRMS** (ESI-TOF) *m/z* Calcd for C<sub>12</sub>H<sub>17</sub>N<sub>2</sub>O<sub>2</sub> (M+H)<sup>+</sup>: 221.1285, found: 221.1292.

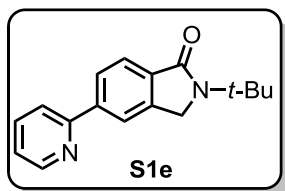

### 2-(tert-butyl)-5-(pyridin-2-yl)isoindolin-1-one (S1e)<sup>13</sup>

A mixture of **7a** (30.9 mg, 0.1 mmol) and HCO<sub>2</sub>NH<sub>4</sub> (126 mg, 2 mmol) in 3 mL of MeOH was stirred under reflux conditions until starting material disappeared. After cooled to room temperature, the solvent was removed under reduced pressure. The resulting mixture was purified by preparative TLC using Hexane/EtOAc as the eluent to afford product **S1e** (22.6 mg, 85%). <sup>1</sup>H NMR (400 MHz, CDCl<sub>3</sub>) δ 8.72 (d, *J* = 4.4 Hz, 1H), 8.10 (s, 1H), 8.02 (d, *J* = 8.0 Hz, 1H), 7.87 (d, *J* = 8.0 Hz, 1H), 7.82-7.76 (m, 2H), 7.30-7.28 (m, 1H), 4.53 (s, 2H), 1.60 (s, 9H); <sup>13</sup>C NMR (100 MHz, CDCl<sub>3</sub>) δ 168.72, 156.88, 149.97, 142.27, 141.42, 137.10, 135.03, 126.88, 123.56, 122.81, 121.17, 54.64, 48.70, 28.20; **HRMS** (ESI-TOF) *m/z* Calcd for C<sub>17</sub>H<sub>19</sub>N<sub>2</sub>O (M+H)<sup>+</sup>: 267.1492, found: 267.1503.

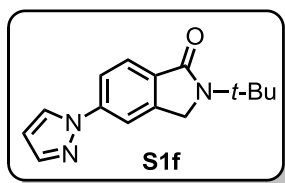

### 2-(tert-butyl)-5-(1H-pyrazol-1-yl)isoindolin-1-one (S1f)

The reaction was carried out under 100 atm of H<sub>2</sub> pressure at 80 °C for 24 h. 85% yield; <sup>1</sup>H NMR (400 MHz, CDCl<sub>3</sub>) δ 7.99 (dd, *J* = 2.4, 0.4 Hz, 1H), 7.85-7.83 (m, 2H), 7.75 (d, *J* = 1.6 Hz, 1H), 7.73-7.70 (m, 1H), 6.51 (dd, *J* = 2.4, 1.6 Hz, 1H), 4.50 (s, 2H), 1.59 (s, 9H); <sup>13</sup>C NMR (100 MHz, CDCl<sub>3</sub>) δ 168.19, 142.37, 141.76, 132.50, 127.13, 124.41, 118.71, 113.33, 108.36, 54.65, 48.52, 28.14; **HRMS** (ESI-TOF) *m/z* Calcd for C<sub>15</sub>H<sub>18</sub>N<sub>3</sub>O (M+H)<sup>+</sup>: 256.1444, found: 256.1449.



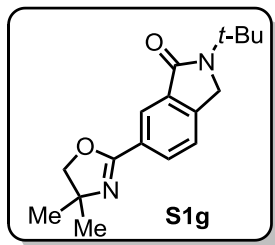

### 2-(tert-butyl)-6-(4,4-dimethyl-4,5-dihydrooxazol-2-yl)isoindolin-1-one (S1g)

The reaction was carried out under 50 atm of H<sub>2</sub> pressure at rt for 24 h. 84% yield; <sup>1</sup>H NMR (400 MHz, CDCl<sub>3</sub>) δ 8.29 (s, 1H), 8.14 (d, *J* = 8.0 Hz, 1H), 7.43 (d, *J* = 8.0 Hz, 1H), 4.49 (s, 2H), 4.13 (s, 2H), 1.57 (s, 9H), 1.39 (s, 6H); <sup>13</sup>C NMR (100 MHz, CDCl<sub>3</sub>) δ 168.13, 161.72, 143.53, 134.85, 131.05, 128.31, 123.22, 122.42, 79.35, 67.83, 54.58, 48.59, 28.52, 28.15; HRMS (ESI-TOF) *m/z* Calcd for C<sub>17</sub>H<sub>23</sub>N<sub>2</sub>O<sub>2</sub> (M+H)<sup>+</sup>: 287.1754, found: 287.1758.

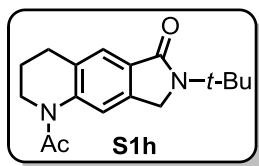

### 1-acetyl-7-(tert-butyl)-3,4,7,8-tetrahydro-1H-pyrrolo[3,4-g]quinolin-6(2H)-one (S1h)

The reaction was carried out under 80 atm of H<sub>2</sub> pressure at 80 °C for 24 h. 90% yield; <sup>1</sup>H NMR (400 MHz, CDCl<sub>3</sub>) δ 7.56 (s, 1H), 7.36 (s, 1H), 4.45 (s, 3H), 3.79 (t, *J* = 6.4 Hz, 2H), 2.79 (t, *J* = 6.4 Hz, 2H), 2.27 (s, 3H), 2.02-1.95 (m, 2H), 1.57 (s, 9H); <sup>13</sup>C NMR (150 MHz, CDCl<sub>3</sub>) δ 170.23, 168.52, 141.69, 138.83, 131.24, 122.90, 118.72, 54.53, 48.35, 43.85, 28.15, 27.39, 24.12, 23.50; HRMS (ESI-TOF) *m/z* Calcd for C<sub>17</sub>H<sub>23</sub>N<sub>2</sub>O<sub>2</sub> (M+H)<sup>+</sup>: 287.1754, found: 287.1759.

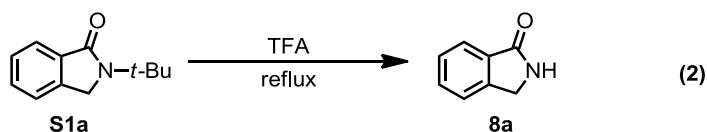

Compound **S1a** (18.9 mg, 0.1 mmol) was dissolved in trifluoroacetic acid and refluxed until the starting material was consumed indicated by TLC. The trifluoroacetic acid was then removed under reduced pressure and the residue was purified by column chromatography (hexanes/EtOAc) to afford **8a** (13.3 mg, 99%)<sup>10</sup>. <sup>1</sup>H NMR (400 MHz, CDCl<sub>3</sub>) δ 7.93 (br, 1H), 7.88 (d, *J* = 8.0 Hz, 1H), 7.58 (t, *J* = 8.0 Hz, 1H), 7.51-7.47 (m, 2H), 4.48 (s, 2H); <sup>13</sup>C NMR (100 MHz, CDCl<sub>3</sub>) δ 172.41, 143.80, 132.24, 131.87, 128.12, 123.82, 123.29, 45.93.

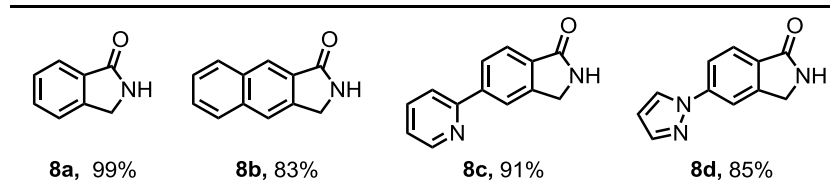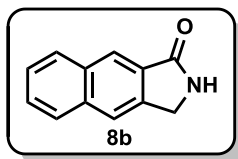

### 2,3-dihydro-1H-benzo[f]isoindol-1-one (8b)

$^1\text{H NMR}$  (400 MHz,  $\text{DMSO-}d_6$ )  $\delta$  8.68 (br, 1H), 8.31 (s, 1H), 8.14 (dd,  $J = 8.2$  Hz,  $J = 0.4$  Hz, 1H), 8.06 (s, 1H), 8.03 (d,  $J = 8.4$  Hz, 1H), 7.64-7.55 (m, 2H), 4.53 (s, 2H);  $^{13}\text{C NMR}$  (150 MHz,  $\text{DMSO-}d_6$ )  $\delta$  169.60, 139.14, 134.67, 132.37, 130.98, 129.32, 127.94, 127.41, 126.05, 122.75, 122.14, 44.58; HRMS (ESI-TOF)  $m/z$  Calcd for  $\text{C}_{12}\text{H}_{10}\text{NO}$  ( $\text{M}+\text{H}$ ) $^+$ : 184.0757, found: 184.0753.

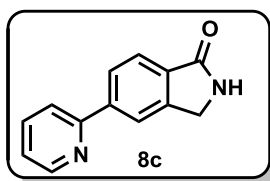

### 5-(pyridin-2-yl)isoindolin-1-one (8c)

$^1\text{H NMR}$  (400 MHz,  $\text{CDCl}_3$ )  $\delta$  8.76 (d,  $J = 4.8$  Hz, 1H), 8.17 (s, 1H), 8.06 (d,  $J = 8.0$  Hz, 1H), 7.98 (d,  $J = 8.0$  Hz, 1H), 7.88-7.81 (m, 2H), 7.36-7.33 (m, 1H), 6.90 (br, 1H), 4.55 (s, 2H);  $^{13}\text{C NMR}$  (150 MHz,  $\text{CDCl}_3$ )  $\delta$  171.47, 156.48, 149.72, 144.40, 142.80, 137.58, 132.54, 127.21, 124.35, 123.16, 122.15, 121.54, 45.86; HRMS (ESI-TOF)  $m/z$  Calcd for  $\text{C}_{13}\text{H}_{11}\text{N}_2\text{O}$  ( $\text{M}+\text{H}$ ) $^+$ : 211.0866, found: 211.0871.

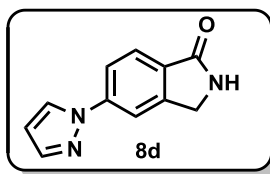

### 5-(1H-pyrazol-1-yl)isoindolin-1-one (8d)

$^1\text{H NMR}$  (400 MHz,  $\text{DMSO-}d_6$ )  $\delta$  8.61 (d,  $J = 2.4$  Hz, 1H), 8.06 (d,  $J = 1.2$  Hz, 1H), 7.98 (dd,  $J = 8.4, 2.0$  Hz, 1H), 7.81 (d,  $J = 1.6$  Hz, 1H), 7.76 (d,  $J = 8.4$  Hz, 1H), 6.59 (dd,  $J = 2.4, 1.6$  Hz, 1H), 4.44 (s, 2H);  $^{13}\text{C NMR}$  (100 MHz,  $\text{DMSO-}d_6$ )  $\delta$  169.23, 145.81, 141.99, 141.65, 130.20,

128.28, 124.06, 118.02, 113.40, 108.48, 44.89; HRMS (ESI-TOF)  $m/z$  Calcd for  $C_{11}H_{10}N_3O$  ( $M+H$ )<sup>+</sup>: 200.0818, found: 200.0821.

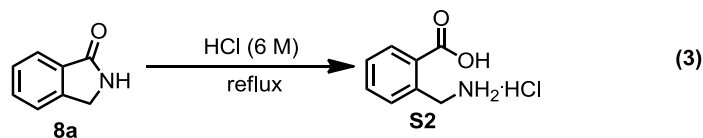

Compound **8a** (13.3 mg, 0.1 mmol) was diluted in 6 M HCl (6 mL) and refluxed overnight. After cooled to room temperature, the mixture was washed with dichloromethane (10 mL x 3). The aqueous phase was concentrated, filtered and washed with ethanol to give **S2** as a white solid (15.5 mg, 83%).<sup>11</sup> <sup>1</sup>H NMR (400 MHz, D<sub>2</sub>O)  $\delta$  8.05 (d,  $J$  = 8.0 Hz, 1H), 7.63 (t,  $J$  = 7.6 Hz, 1H), 7.55 (t,  $J$  = 7.6 Hz, 1H), 7.49 (d,  $J$  = 8.0 Hz, 1H), 4.34 (s, 2H).

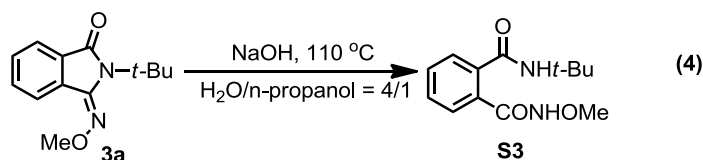

A mixture of **3a** (23.2 mg, 0.1 mmol) and NaOH (16 mg, 0.4 mmol) in 1 mL of water and 0.25 mL of n-propanol was heated to 100 °C until starting material disappeared. After cooled to room temperature, the solvents were removed under reduced pressure. The resulting mixture was purified by preparative TLC using DCM/MeOH as the eluent to afford product **S3** (17.5 mg, 70%).<sup>12</sup> <sup>1</sup>H NMR (400 MHz, CDCl<sub>3</sub>)  $\delta$  8.05 (d,  $J$  = 7.2 Hz, 1H), 7.57-7.51 (m, 3H), 3.87 (s, 3H), 1.09 (s, 9H); <sup>13</sup>C NMR (150 MHz, CDCl<sub>3</sub>)  $\delta$  169.15, 155.02, 132.54, 131.71, 131.67, 130.27, 129.95, 128.56, 61.45, 53.07, 31.40; HRMS (ESI-TOF)  $m/z$  Calcd for  $C_{13}H_{19}N_2O_3$  ( $M+H$ )<sup>+</sup>: 251.1390, found: 251.1395.

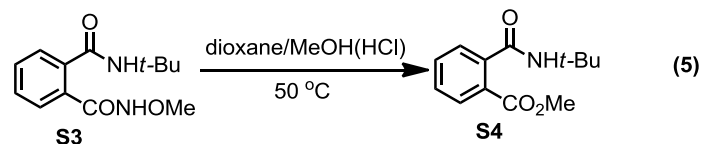

To a solution of substrate **S3** (12.5 mg, 0.05 mmol) in 9 mL of dioxane was added 0.5 mL of a 10 M solution of anhydrous hydrochloric acid in methanol at room temperature. The mixture was stirred at 50 °C for 3 h. After cooling to room temperature, 5 mL of saturated NaHCO<sub>3</sub> (aq.) was added. Then, the organic phase was extracted with EtOAc and dried over anhydrous Na<sub>2</sub>SO<sub>4</sub>. The solvent was removed under reduced pressure and the residue was purified by preparative



## 2.6 The Synthesis of Pd-complex E

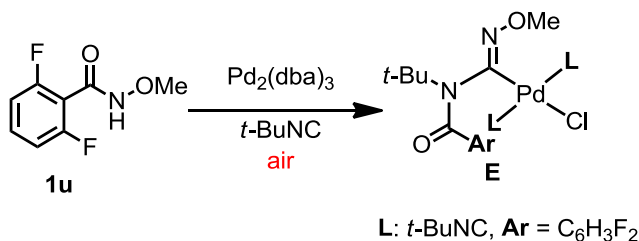

A 50 mL vessel equipped with a magnetic stir bar was charged with substrate **1u** (0.2 mmol, 37.5 mg, 1.0 equiv.), Pd<sub>2</sub>(dba)<sub>3</sub> (46 mg, 0.05 mmol, 0.25 equiv.), *t*-Butylisocyanide (0.30 mmol, 36  $\mu$ L, 1.5 equiv.), dioxane (2 mL). The mixture was then submerged into a pre-heated 80 °C oil bath for 12 h. The reaction vessel was then cooled to rt, filtrated and concentrated *in vacuo*. The resulting residue was purified by preparative TLC using hexanes/EtOAc as the eluent to afford the product **E** (15 mg, 26% yield). <sup>1</sup>H NMR (400 MHz, CDCl<sub>3</sub>)  $\delta$  7.33-7.26 (m, 1H), 6.89 (dd, *J* = 8.4, 7.2 Hz, 2H), 3.67 (s, 3H), 1.68 (s, 9H), 1.49 (s, 18H); <sup>13</sup>C NMR (150 MHz, CDCl<sub>3</sub>)  $\delta$  162.13, 158.58 (dd, *J* = 247.1, 7.5 Hz), 148.38, 129.92 (t, *J* = 9.6 Hz), 127.91 (t, *J* = 17.2 Hz), 118.77 (t, *J* = 23.1 Hz), 111.69 (dd, *J* = 20.7, 4.0 Hz), 61.76, 61.03, 58.23, 30.00, 29.58; HRMS (ESI-TOF) *m/z* Calcd for C<sub>23</sub>H<sub>33</sub>F<sub>2</sub>N<sub>4</sub>O<sub>2</sub>Pd (M-Cl)<sup>+</sup>: 537.1622, found: 537.1642.

## 2.7 The Reactions of 6a with Pd(OAc)<sub>2</sub> and Pd(TFA)<sub>2</sub>

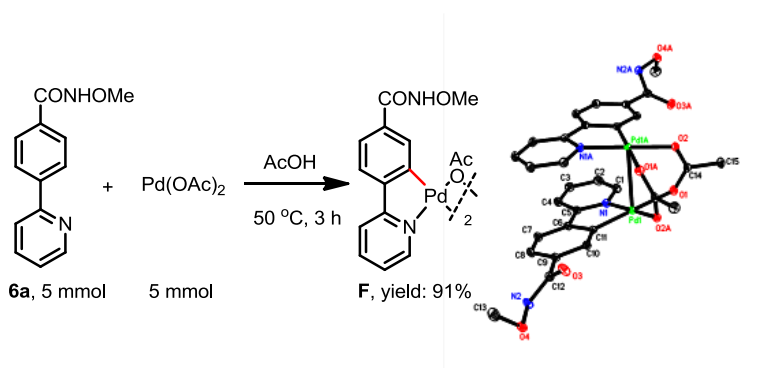

A 250 mL vessel equipped with a magnetic stir bar was charged with substrate **6a** (1.14g, 5.0 mmol, 1.0 equiv.), Pd(OAc)<sub>2</sub> (1.12 g, 5.0 mmol, 1.0 equiv.), AcOH (60 mL). The mixture was then submerged into a pre-heated 50 °C oil bath for 3 h. The reaction vessel was then cooled to rt and concentrated *in vacuo*. The solid residue was washed with CH<sub>2</sub>Cl<sub>2</sub> (20 mL) and Et<sub>2</sub>O (20 mL) to afford the product **F** as yellow solid (1.78 g, 91% yield). <sup>1</sup>H NMR (400 MHz, Acetic acid-*d*<sub>4</sub>)

$\delta$  7.97 (d,  $J = 5.6$  Hz, 1H), 7.62 (t,  $J = 7.8$  Hz, 1H), 7.33 (d,  $J = 8.0$  Hz, 1H), 7.29 (d,  $J = 8.0$  Hz, 1H), 7.10 (s, 1H), 7.09 (d,  $J = 8.0$  Hz, 1H), 6.87 (t,  $J = 6.6$  Hz, 1H), 3.86 (s, 3H), 2.07-2.06 (m, 6H).

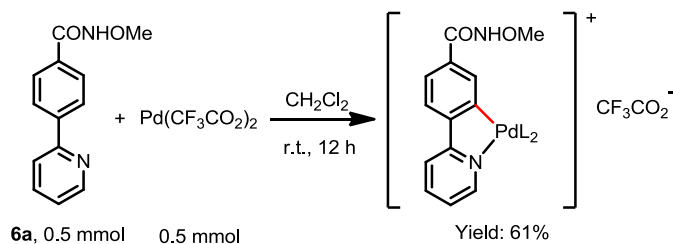

To a mixture of *N*-methoxy-4-(pyridin-2-yl)benzamide (114 mg, 0.5 mmol,) and Pd(CF<sub>3</sub>CO<sub>2</sub>)<sub>2</sub> (166 mg, 0.5 mmol) was added CH<sub>2</sub>Cl<sub>2</sub> (25 mL). Then the mixture was stirred at room temperature overnight. After reaction, the solvent was evaporated in vacuo and the solid residue was washed with CH<sub>2</sub>Cl<sub>2</sub> (10 mL) to afford 135 mg of the title compound as a yellow solid (61% yield). <sup>1</sup>H NMR (400 MHz, CD<sub>3</sub>CN)  $\delta$  10.22 (brs, 1H), 8.26 (d,  $J = 5.2$  Hz, 1H), 7.95 (t,  $J = 7.8$  Hz, 1H), 7.73 (d,  $J = 8.4$  Hz, 1H), 7.45 (s, 2H), 7.33 (s, 1H), 7.29 (t,  $J = 6.6$  Hz, 1H), 3.80 (s, 3H).

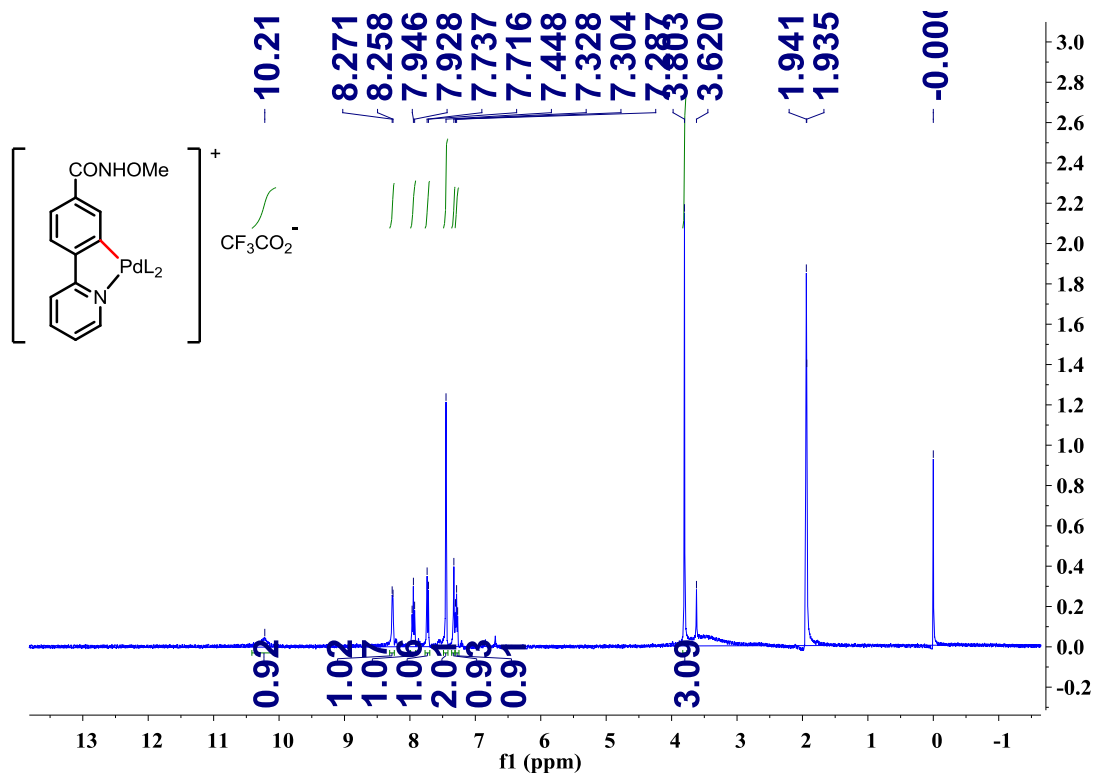

## 2.8 The Transformation of Pd-complex F

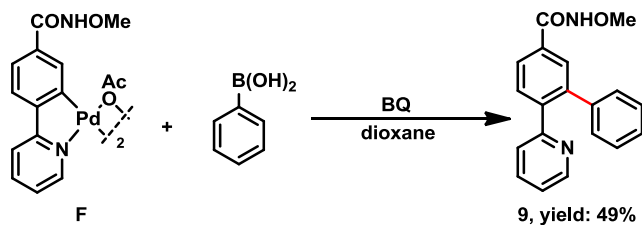

To a mixture of complex (16.6 mg, 0.021 mmol) and BQ (5.4 mg, 0.05 mmol) in dioxane (0.5 mL) in a pressure tube is added  $\text{PhB(OH)}_2$  (18.3 mg, 0.15 mmol). The reaction mixture is then heated at 100 °C for 3 hours and then at 80 °C overnight. The reaction mixture is cooled to 23 °C and the solvent is removed in vacuo. The crude product is purified by chromatography on silica gel eluting with EtOAc to afford 6.2 mg of desired compound **9** (49% yield). **<sup>1</sup>H NMR** (400 MHz,  $\text{CDCl}_3$ )  $\delta$  9.65 (br, 1H), 8.65 (d,  $J = 4.0$  Hz, 1H), 7.81 (s, 1H), 7.74 (d,  $J = 7.8$  Hz, 1H), 7.67 (d,  $J = 7.8$  Hz, 1H), 7.42 (t,  $J = 7.6$  Hz, 1H), 7.23-7.22 (m, 3H), 7.17-7.11 (m, 3H), 6.87 (d,  $J = 7.6$  Hz, 1H), 3.89 (s, 3H); **<sup>13</sup>C NMR** (150 MHz,  $\text{CDCl}_3$ )  $\delta$  166.21, 158.05, 149.48, 142.60, 141.15, 140.10, 135.57, 132.02, 130.89, 129.55, 129.42, 128.26, 127.25, 125.99, 125.42, 122.01, 64.63; **HRMS** (ESI-TOF)  $m/z$  Calcd for  $\text{C}_{19}\text{H}_{17}\text{N}_2\text{O}_2$  ( $\text{M}+\text{H}$ )<sup>+</sup>: 305.1285, found: 305.1285.

**NOESY** (600 MHz,  $\text{CDCl}_3$ ).

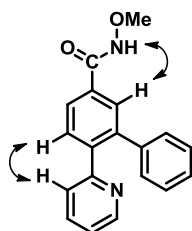

## 2.9 The Effect of Heterocycle in Previous Reported C–H Activation Reactions Using N-methoxyamide Directing Group

*Org. Lett.* **13**, 5326-5329 (2011):

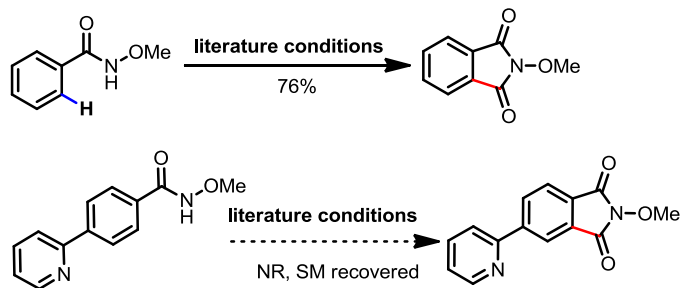

**conditions:** Pd(OAc)<sub>2</sub> (5 mol %), BQ (2 equiv), AcOH, 110 °C, 8-18 h, 1 atm CO.

*Angew. Chem. Int. Ed.* **50**, 1380–1383 (2011):

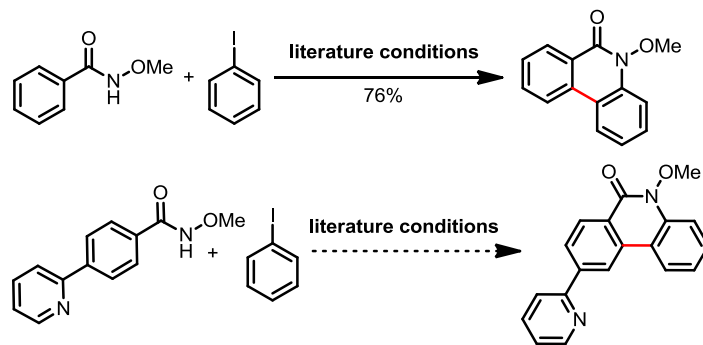

No desired product.  
-CONHOMe in SM was decomposed to -CO<sub>2</sub>CH<sub>3</sub>.

**conditions:** Pd(OAc)<sub>2</sub> (5 mol %), Ag<sub>2</sub>O (2 equiv), AcOH, 120 °C, 13-36 h.

*J. Org. Chem.* **75**, 476–479 (2010):

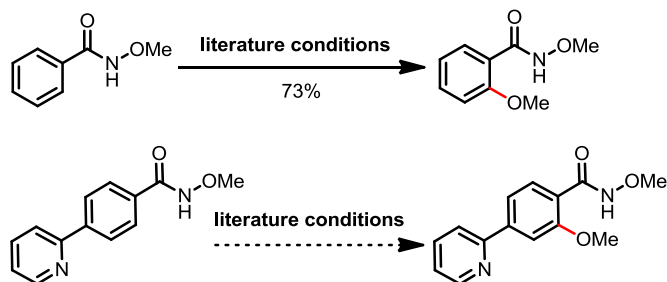

No desired product.  
-CONHOMe in SM was decomposed to -CO<sub>2</sub>CH<sub>3</sub>.

**conditions:** Pd(OAc)<sub>2</sub> (5 mol %), K<sub>2</sub>S<sub>2</sub>O<sub>8</sub>, 4 Å MS, MeOH/dioxane (1:1), 55 °C, 6.5 h.



*Chem. Commun.* **47**, 12789–12791 (2011):

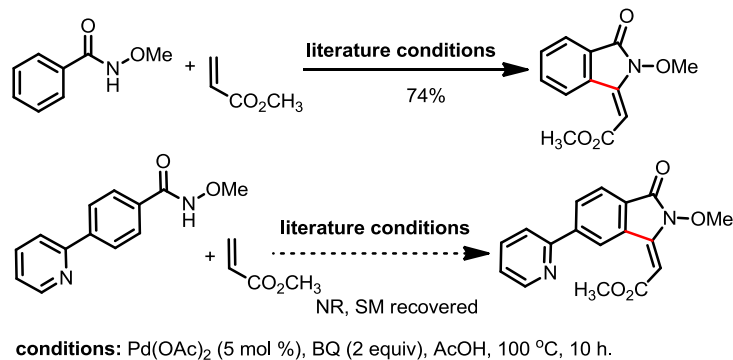

*Chem. Commun.* **48**, 3236–3238 (2012):

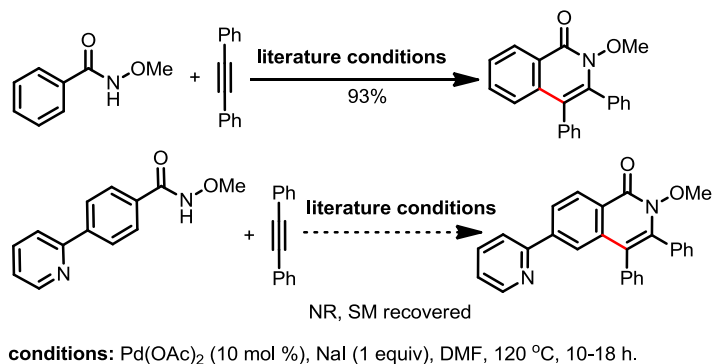

*J. Am. Chem. Soc.* **130**, 7190–7191 (2008):

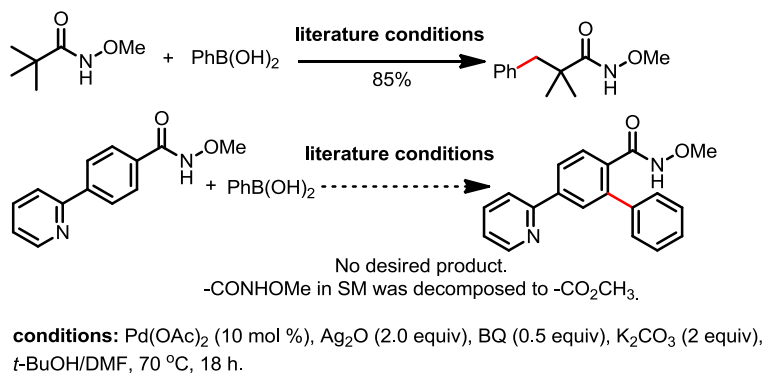

## 2.10 Reduction of Pd(II) Species in Isocyanides: Experimental Procedure and Photos

A 25 mL sealed tube equipped with a magnetic stir bar was charged with palladium salt (0.05 mmol), *t*-BuNC (24  $\mu$ L, 0.2 mmol), dioxane (1.5 mL) under Ar atmosphere. The mixture was stirred at room temperature for 15 mins and then the tube was submerged into a pre-heated 80 °C oil bath. The pictures were taken at 0, 15 min at room temperature and 30, 180 min at 80 °C respectively. These photos show that Pd(OAc)<sub>2</sub> can be readily reduced to Pd(0) while PdCl<sub>2</sub>, Pd(TFA)<sub>2</sub>, Pd(OTf)<sub>2</sub> remains as homogeneous Pd(II) species under the reactions conditions.

| entry | Pd(OAc) <sub>2</sub>                                                                | PdCl <sub>2</sub>                                                                   | Pd(TFA) <sub>2</sub>                                                                 | Pd(OTf) <sub>2</sub> (MeCN) <sub>4</sub>                                              |
|-------|-------------------------------------------------------------------------------------|-------------------------------------------------------------------------------------|--------------------------------------------------------------------------------------|---------------------------------------------------------------------------------------|
| 1     |    |    |    |    |
| 2     |   |   |   |   |
| 3     |  |  |  |  |
| 4     |  |  |  |  |

Conditions: 0.05 mmol Pd, 0.2 mmol *t*-BuNC in 1.5 mL dioxane.

entry1: 0 min at r.t. entry 2: 15 min at r.t. entry 3: 30 min at 80 °C. entry 4: 180 min at 80 °C.

### 3. Analytical Data

#### 3.1 Characterization of Substrates

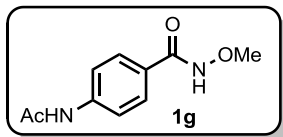

#### 4-acetamido-N-methoxybenzamide (1g)

Following typical procedure 3:  $^1\text{H NMR}$  (400 MHz,  $\text{DMSO-}d_6$ )  $\delta$  11.62 (s, 1H), 10.18 (s, 1H), 7.70 (d,  $J = 8.8$  Hz, 2H), 7.65 (d,  $J = 8.8$  Hz, 2H), 3.69 (s, 3H), 2.07 (s, 3H);  $^{13}\text{C NMR}$  (100 MHz,  $\text{DMSO-}d_6$ )  $\delta$  168.79, 163.84, 142.30, 127.95, 126.42, 118.22, 63.27, 24.16; **HRMS** (ESI-TOF)  $m/z$  Calcd for  $\text{C}_{10}\text{H}_{13}\text{N}_2\text{O}_3$  ( $\text{M}+\text{H}$ ) $^+$ : 209.0921, found: 209.0925.

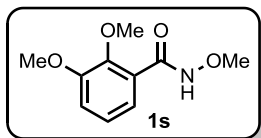

#### N,2,3-trimethoxybenzamide (1s)

Following typical procedure 1:  $^1\text{H NMR}$  (400 MHz,  $\text{CDCl}_3$ )  $\delta$  10.29 (br, 1H), 7.68 (d,  $J = 8.0$  Hz, 1H), 7.18 (t,  $J = 8.0$  Hz, 1H), 7.07 (dd,  $J = 8.0, 1.6$  Hz, 1H), 3.93 (s, 3H), 3.90 (s, 3H), 3.89 (s, 3H);  $^{13}\text{C NMR}$  (100 MHz,  $\text{CDCl}_3$ )  $\delta$  163.55, 152.17, 146.68, 124.63, 124.34, 121.95, 115.49, 64.00, 61.09, 55.75; **HRMS** (ESI-TOF)  $m/z$  Calcd for  $\text{C}_{10}\text{H}_{14}\text{NO}_4$  ( $\text{M}+\text{H}$ ) $^+$ : 212.0923, found: 212.0922.

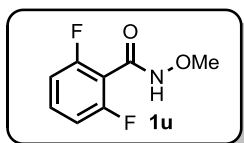

#### 2,6-difluoro-N-methoxybenzamide (1u)

Following typical procedure 1:  $^1\text{H NMR}$  (400 MHz,  $\text{CDCl}_3$ )  $\delta$  8.61 (br, 1H), 7.45-7.38 (m, 1H), 6.97 (t,  $J = 8.0$  Hz, 2H), 3.92 (s, 3H);  $^{13}\text{C NMR}$  (100 MHz,  $\text{CDCl}_3$ )  $\delta$  159.67 (dd,  $J = 251.5, 6.7$  Hz), 158.05, 132.10 (t,  $J = 10.1$  Hz), 111.56-111.34 (m), 110.94 (t,  $J = 20.8$  Hz), 63.76; **HRMS** (ESI-TOF)  $m/z$  Calcd for  $\text{C}_8\text{H}_8\text{F}_2\text{NO}_2$  ( $\text{M}+\text{H}$ ) $^+$ : 188.0518, found: 188.0519.

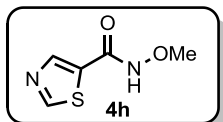

#### N-methoxythiazole-5-carboxamide (4h)

Following typical procedure 2:  $^1\text{H NMR}$  (400 MHz,  $\text{CDCl}_3$ )  $\delta$  11.92 (br, 1H), 9.07 (s, 1H), 8.52 (s, 1H), 3.88 (s, 3H);  $^{13}\text{C NMR}$  (100 MHz,  $\text{CDCl}_3$ )  $\delta$  159.10, 157.39, 143.96, 131.57, 64.34; **HRMS** (ESI-TOF)  $m/z$  Calcd for  $\text{C}_5\text{H}_7\text{N}_2\text{O}_2\text{S}$  ( $\text{M}+\text{H}$ ) $^+$ : 159.0223, found: 159.0225.

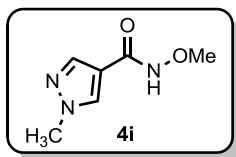

#### N-methoxy-1-methyl-1H-pyrazole-4-carboxamide (4i)

Following typical procedure 2:  $^1\text{H NMR}$  (400 MHz,  $\text{CDCl}_3$ )  $\delta$  8.67 (br, 1H), 7.92 (s, 1H), 7.85 (s, 1H), 3.94 (s, 3H), 3.84 (s, 3H);  $^{13}\text{C NMR}$  (100 MHz,  $\text{CDCl}_3$ )  $\delta$  162.45, 139.16, 132.33, 115.19, 64.52, 39.27; **HRMS** (ESI-TOF)  $m/z$  Calcd for  $\text{C}_6\text{H}_{10}\text{N}_3\text{O}_2$  ( $\text{M}+\text{H}$ ) $^+$ : 156.0768, found: 156.0771.

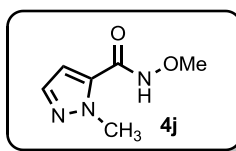

#### N-methoxy-1-methyl-1H-pyrazole-5-carboxamide (4j)

Following typical procedure 2:  $^1\text{H NMR}$  (400 MHz,  $\text{CDCl}_3$ )  $\delta$  11.65 (br, 1H), 7.48 (d,  $J = 2.0$  Hz, 1H), 6.88 (d,  $J = 2.0$  Hz, 1H), 4.20 (s, 3H), 3.89 (s, 3H);  $^{13}\text{C NMR}$  (100 MHz,  $\text{CDCl}_3$ )  $\delta$  158.22, 136.99, 131.90, 106.76, 63.64, 38.36; **HRMS** (ESI-TOF)  $m/z$  Calcd for  $\text{C}_6\text{H}_{10}\text{N}_3\text{O}_2$  ( $\text{M}+\text{H}$ ) $^+$ : 156.0768, found: 156.0770.

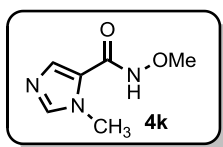

#### N-methoxy-1-methyl-1H-imidazole-5-carboxamide (4k)

Following typical procedure 2:  $^1\text{H NMR}$  (400 MHz,  $\text{CDCl}_3$ )  $\delta$  11.81 (br, 1H), 7.61 (s, 1H), 7.59 (s, 1H), 3.95 (s, 3H), 3.85 (s, 1H);  $^{13}\text{C NMR}$  (100 MHz,  $\text{CDCl}_3$ )  $\delta$  159.51, 141.51, 131.68, 123.81, 64.47, 34.18; **HRMS** (ESI-TOF)  $m/z$  Calcd for  $\text{C}_6\text{H}_{10}\text{N}_3\text{O}_2$  ( $\text{M}+\text{H}$ ) $^+$ : 156.0768, found: 156.0770.

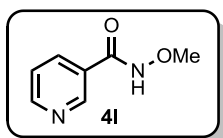

### N-methoxynicotinamide (4l)

Following typical procedure 2:  $^1\text{H NMR}$  (400 MHz,  $\text{CDCl}_3$ )  $\delta$  11.94 (br, 1H), 9.02 (s, 1H), 8.65 (d,  $J = 4.8$  Hz, 1H), 8.21 (d,  $J = 8.0$  Hz, 1H), 7.40 (dd,  $J = 7.6, 4.8$  Hz, 1H), 3.85 (s, 3H);  $^{13}\text{C NMR}$  (100 MHz,  $\text{CDCl}_3$ )  $\delta$  163.71, 151.79, 147.79, 135.61, 128.09, 123.64, 64.03; **HRMS** (ESI-TOF)  $m/z$  Calcd for  $\text{C}_7\text{H}_9\text{N}_2\text{O}_2$  ( $\text{M}+\text{H}$ ) $^+$ : 153.0659, found: 153.0652.

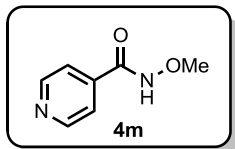

### N-methoxyisonicotinamide (4m)

Following typical procedure 2:  $^1\text{H NMR}$  (400 MHz,  $\text{CDCl}_3$ )  $\delta$  11.41 (br, 1H), 8.66 (d,  $J = 5.6$  Hz, 2H), 7.72 (d,  $J = 5.6$  Hz, 2H), 3.87 (s, 3H);  $^{13}\text{C NMR}$  (100 MHz,  $\text{CDCl}_3$ )  $\delta$  162.70, 149.76, 139.59, 121.35, 63.91; **HRMS** (ESI-TOF)  $m/z$  Calcd for  $\text{C}_7\text{H}_9\text{N}_2\text{O}_2$  ( $\text{M}+\text{H}$ ) $^+$ : 153.0659, found: 153.0652.

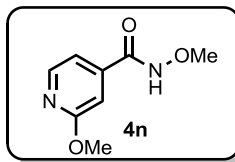

### N,2-dimethoxyisonicotinamide (4n)

Following typical procedure 2:  $^1\text{H NMR}$  (400 MHz,  $\text{CDCl}_3$ )  $\delta$  10.38 (br, 1H), 8.50 (dd,  $J = 7.6, 2.0$  Hz, 1H), 8.29 (dd,  $J = 4.8, 2.0$  Hz, 1H), 7.08 (dd,  $J = 7.6, 5.2$  Hz, 1H), 4.11 (s, 3H), 3.90 (s, 3H);  $^{13}\text{C NMR}$  (100 MHz,  $\text{CDCl}_3$ )  $\delta$  162.32, 160.08, 149.94, 141.37, 117.77, 113.97, 64.44, 54.23; **HRMS** (ESI-TOF)  $m/z$  Calcd for  $\text{C}_8\text{H}_{11}\text{N}_2\text{O}_3$  ( $\text{M}+\text{H}$ ) $^+$ : 183.0764, found: 183.0771.

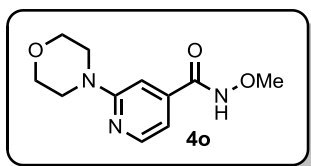

### N-methoxy-2-morpholinoisonicotinamide (4o)

Following typical procedure 2:  $^1\text{H NMR}$  (400 MHz,  $\text{CDCl}_3$ )  $\delta$  10.22 (br, 1H), 8.21 (d,  $J = 5.2$  Hz, 1H), 7.02 (s, 1H), 6.86 (d,  $J = 3.6$  Hz, 1H), 3.84 (s, 3H), 3.78 (t,  $J = 4.8, 4\text{H}$ ), 3.52 (t,  $J = 4.8$  Hz, 4H);  $^{13}\text{C NMR}$  (100 MHz,  $\text{CDCl}_3$ )  $\delta$  165.04, 159.93, 148.79, 140.65, 110.06, 104.90, 66.64, 64.49, 45.37; **HRMS** (ESI-TOF)  $m/z$  Calcd for  $\text{C}_{11}\text{H}_{16}\text{N}_3\text{O}_3$  ( $\text{M}+\text{H}$ ) $^+$ : 238.1186, found: 238.1177.

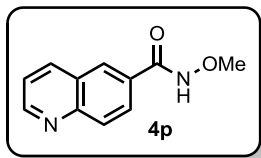

#### N-methoxyquinoline-6-carboxamide (4p)

Following typical procedure 3:  $^1\text{H NMR}$  (400 MHz, DMSO- $d_6$ )  $\delta$  12.01 (br, 1H), 8.99 (s, 1H), 8.49 (d,  $J = 8.0$  Hz, 1H), 8.43 (s, 1H), 8.08 (s, 2H), 7.62-7.61 (m, 1H), 3.77 (s, 3H);  $^{13}\text{C NMR}$  (100 MHz, DMSO- $d_6$ )  $\delta$  163.65, 152.23, 148.73, 137.09, 130.11, 129.26, 127.99, 127.30, 127.13, 122.29, 63.34; **HRMS** (ESI-TOF)  $m/z$  Calcd for  $\text{C}_{11}\text{H}_{11}\text{N}_2\text{O}_2$  ( $\text{M}+\text{H}$ ) $^+$ : 203.0815, found 203.0820.

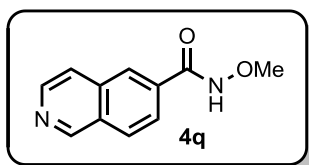

#### N-methoxyisoquinoline-6-carboxamide (4q)

Following typical procedure 3:  $^1\text{H NMR}$  (400 MHz,  $\text{CDCl}_3$ )  $\delta$  11.49 (br, 1H), 9.19 (s, 1H), 8.46 (d,  $J = 5.6$  Hz, 1H), 8.30 (s, 1H), 8.00 (d,  $J = 8.4$  Hz, 1H), 7.92 (d,  $J = 8.4$  Hz, 1H), 7.61 (d,  $J = 5.6$  Hz, 1H), 3.92 (s, 3H);  $^{13}\text{C NMR}$  (100 MHz,  $\text{CDCl}_3$ )  $\delta$  152.10, 143.26, 135.14, 133.79, 129.41, 128.14, 126.29, 125.47, 121.36, 64.24; **HRMS** (ESI-TOF)  $m/z$  Calcd for  $\text{C}_{11}\text{H}_{11}\text{N}_2\text{O}_2$  ( $\text{M}+\text{H}$ ) $^+$ : 203.0815, found: 203.0814.

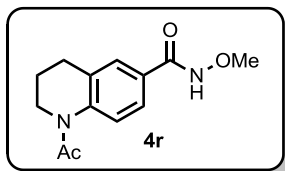

#### 1-acetyl-N-methoxy-1,2,3,4-tetrahydroquinoline-6-carboxamide (4r)

Following typical procedure 3:  $^1\text{H NMR}$  (400 MHz,  $\text{CDCl}_3$ )  $\delta$  10.92 (br, 1H), 7.69 (s, 1H), 7.65 (d,  $J = 7.6$  Hz, 1H), 7.44 (s, 1H), 3.84 (s, 3H), 3.76 (t,  $J = 5.6$  Hz, 2H), 2.74 (t,  $J = 5.6$  Hz, 2H), 2.26 (s, 3H), 1.95 (t,  $J = 5.6$  Hz, 2H);  $^{13}\text{C NMR}$  (100 MHz,  $\text{CDCl}_3$ )  $\delta$  170.41, 165.39, 141.56, 131.94, 128.01, 124.77, 124.23, 64.06, 44.72, 26.89, 23.58, 23.40; **HRMS** (ESI-TOF)  $m/z$  Calcd for  $\text{C}_{13}\text{H}_{17}\text{N}_2\text{O}_3$  ( $\text{M}+\text{H}$ ) $^+$ : 249.1234, found: 249.1238.

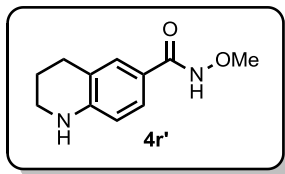

#### N-methoxy-1,2,3,4-tetrahydroquinoline-6-carboxamide (4r')

**Following typical procedure 3:**  $^1\text{H NMR}$  (400 MHz,  $\text{CDCl}_3$ )  $\delta$  8.53 (s, 1H), 7.39 (s, 1H), 7.35 (d,  $J = 8.0$  Hz, 1H), 6.40 (d,  $J = 8.4$  Hz, 1H), 4.23 (brs, 1H), 3.85 (s, 3H), 3.35 (t,  $J = 5.6$  Hz, 2H), 2.76 (t,  $J = 6.2$  Hz, 2H), 1.95-1.89 (m, 2H);  $^{13}\text{C NMR}$  (100 MHz,  $\text{CDCl}_3$ )  $\delta$  167.24, 148.19, 128.80, 126.17, 120.42, 118.80, 112.85, 64.54, 41.67, 26.91, 21.39; **HRMS** (ESI-TOF)  $m/z$  Calcd for  $\text{C}_{11}\text{H}_{15}\text{N}_2\text{O}_2$  ( $\text{M}+\text{H}$ ) $^+$ : 207.1128, found: 207.1130.

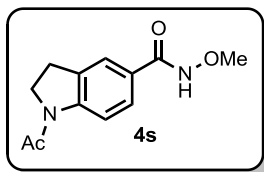

#### 1-acetyl-N-methoxyindoline-5-carboxamide (4s)

**Following typical procedure 3:**  $^1\text{H NMR}$  (400 MHz,  $\text{DMSO}-d_6$ )  $\delta$  11.63 (br, 1H), 8.05 (d,  $J = 8.4$  Hz, 1H), 7.61 (s, 1H), 7.59 (d,  $J = 8.4$  Hz, 1H), 4.11 (t,  $J = 8.4$  Hz, 2H), 3.68 (s, 3H), 3.14 (t,  $J = 8.4$  Hz, 2H), 2.16 (s, 3H);  $^{13}\text{C NMR}$  (100 MHz,  $\text{DMSO}-d_6$ )  $\delta$  169.17, 163.91, 145.64, 132.12, 126.75, 126.70, 123.72, 114.97, 63.22, 48.49, 27.06, 24.07; **HRMS** (ESI-TOF)  $m/z$  Calcd for  $\text{C}_{12}\text{H}_{15}\text{N}_2\text{O}_3$  ( $\text{M}+\text{H}$ ) $^+$ : 235.1077, found: 235.1080.

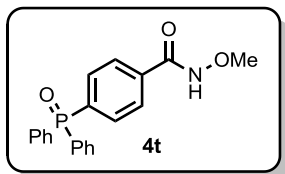

#### 4-(diphenylphosphoryl)-N-methoxybenzamide (4t)

**Following typical procedure 1:**  $^1\text{H NMR}$  (400 MHz,  $\text{CDCl}_3$ )  $\delta$  11.95 (br, 1H), 7.84 (dd,  $J = 8.0$ , 2.0 Hz, 2H), 7.57-7.43 (m, 12H), 3.87 (s, 3H);  $^{13}\text{C NMR}$  (100 MHz,  $\text{CDCl}_3$ )  $\delta$  164.62, 136.23(d,  $J = 1.6$  Hz), 134.85 (d,  $J = 102.1$  Hz), 132.45 (d,  $J = 2.7$  Hz), 131.94 (d,  $J = 11.3$  Hz), 131.83 (d,  $J = 10.1$  Hz), 131.09 (d,  $J = 72.6$  Hz), 128.72 (d,  $J = 12.3$  Hz), 127.67 (d,  $J = 12.2$  Hz), 63.85; **HRMS** (ESI-TOF)  $m/z$  Calcd for  $\text{C}_{20}\text{H}_{19}\text{NO}_3\text{P}$  ( $\text{M}+\text{H}$ ) $^+$ : 352.1097, found: 352.1099.

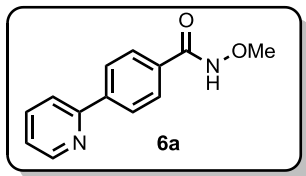

#### N-methoxy-4-(pyridin-2-yl)benzamide (6a)

Following typical procedure 3:  $^1\text{H NMR}$  (400 MHz,  $\text{CDCl}_3$ )  $\delta$  10.63 (s, 1H), 8.66 (d,  $J = 4.4$  Hz, 1H), 7.90 (d,  $J = 8.0$  Hz, 2H), 7.81 (d,  $J = 8.4$  Hz, 2H), 7.75 (td,  $J = 7.6, 2.0$  Hz, 1H), 7.67 (d,  $J = 8.0$  Hz, 1H), 7.26 (dd,  $J = 6.8, 5.2$  Hz, 1H), 3.84 (s, 3H);  $^{13}\text{C NMR}$  (100 MHz,  $\text{CDCl}_3$ )  $\delta$  166.19, 156.25, 149.67, 142.43, 137.17, 132.27, 127.76, 127.04, 122.93, 121.21, 64.34; **HRMS** (ESI-TOF)  $m/z$  Calcd for  $\text{C}_{13}\text{H}_{13}\text{N}_2\text{O}_2$  ( $\text{M}+\text{H}$ ) $^+$ : 229.0972, found: 229.0979.

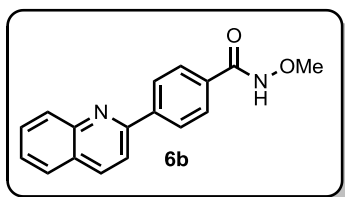

#### N-methoxy-4-(quinolin-2-yl)benzamide (6b)

Following typical procedure 3:  $^1\text{H NMR}$  (400 MHz,  $\text{CDCl}_3$ )  $\delta$  9.11 (br, 1H), 8.26-8.17 (m, 4H), 7.88-7.84 (m, 4H), 7.76 (t,  $J = 7.6$  Hz, 1H), 7.57 (t,  $J = 7.6$  Hz, 1H), 3.93 (s, 3H);  $^{13}\text{C NMR}$  (100 MHz,  $\text{CDCl}_3$ )  $\delta$  156.04, 148.37, 143.19, 137.26, 132.42, 130.14, 129.87, 127.96, 127.74, 127.68, 127.55, 126.96, 119.04, 64.87; **HRMS** (ESI-TOF)  $m/z$  Calcd for  $\text{C}_{17}\text{H}_{15}\text{N}_2\text{O}_2$  ( $\text{M}+\text{H}$ ) $^+$ : 279.1128, found: 279.1130.

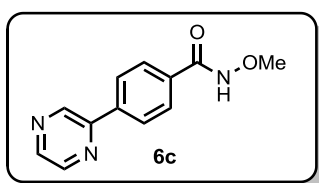

#### N-methoxy-4-(pyrazin-2-yl)benzamide (6c)

Following typical procedure 3:  $^1\text{H NMR}$  (400 MHz,  $\text{CD}_3\text{OD}$ )  $\delta$  9.16 (d,  $J = 1.6$  Hz, 1H), 8.71 (dd,  $J = 2.4, 1.6$  Hz, 1H), 8.58 (d,  $J = 2.4$  Hz, 1H), 8.19 (d,  $J = 8.4$  Hz, 2H), 7.91 (d,  $J = 8.8$  Hz, 2H), 3.84 (s, 3H);  $^{13}\text{C NMR}$  (100 MHz,  $\text{CD}_3\text{OD}$ )  $\delta$  153.01, 145.84, 144.72, 143.35, 140.82, 134.36, 128.93, 128.24, 64.46; **HRMS** (ESI-TOF)  $m/z$  Calcd for  $\text{C}_{12}\text{H}_{12}\text{N}_3\text{O}_2$  ( $\text{M}+\text{H}$ ) $^+$ : 230.0924, found: 230.0929.



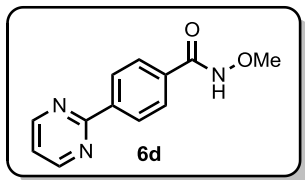

**N-methoxy-4-(pyrimidin-2-yl)benzamide (6d)**

Following typical procedure 3:  $^1\text{H NMR}$  (400 MHz,  $\text{CD}_3\text{OD}$ )  $\delta$  8.89 (d,  $J = 4.8$  Hz, 2H), 8.51 (d,  $J = 8.4$  Hz, 2H), 7.88 (d,  $J = 8.8$  Hz, 2H), 7.40 (t,  $J = 4.8$  Hz, 1H), 3.84 (s, 3H);  $^{13}\text{C NMR}$  (100 MHz,  $\text{CD}_3\text{OD}$ )  $\delta$  167.04, 164.33, 158.59, 141.84, 134.76, 129.18, 128.34, 121.09, 64.43; **HRMS** (ESI-TOF)  $m/z$  Calcd for  $\text{C}_{12}\text{H}_{12}\text{N}_3\text{O}_2$  ( $\text{M}+\text{H}$ ) $^+$ : 230.0924, found: 230.0933.

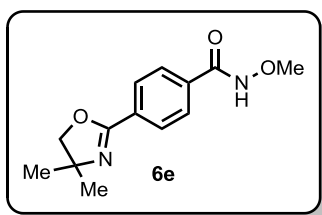

**4-(4,4-dimethyl-4,5-dihydrooxazol-2-yl)-N-methoxybenzamide (6e)**

Following typical procedure 3:  $^1\text{H NMR}$  (400 MHz,  $\text{CDCl}_3$ )  $\delta$  10.03 (br, 1H), 7.90 (d,  $J = 8.0$  Hz, 2H), 7.75 (d,  $J = 8.0$  Hz, 2H), 4.13 (s, 2H), 3.86 (s, 3H), 1.38 (s, 6H);  $^{13}\text{C NMR}$  (100 MHz,  $\text{CDCl}_3$ )  $\delta$  165.94, 161.60, 134.41, 131.20, 128.50, 127.29, 79.44, 67.93, 64.58, 28.44; **HRMS** (ESI-TOF)  $m/z$  Calcd for  $\text{C}_{13}\text{H}_{17}\text{N}_2\text{O}_3$  ( $\text{M}+\text{H}$ ) $^+$ : 249.1234, found: 249.1238.

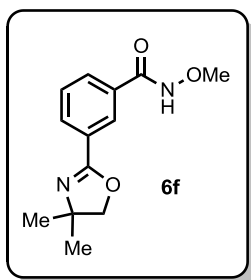

**3-(4,4-dimethyl-4,5-dihydrooxazol-2-yl)-N-methoxybenzamide (6f)**

Following typical procedure 3:  $^1\text{H NMR}$  (400 MHz,  $\text{CDCl}_3$ )  $\delta$  11.68 (br, 1H), 8.30 (s, 1H), 7.93 (dd,  $J = 7.6, 1.2$  Hz, 2H), 7.36 (t,  $J = 7.6$  Hz, 1H), 4.05 (s, 2H), 3.84 (s, 3H), 1.31 (s, 6H);  $^{13}\text{C NMR}$  (100 MHz,  $\text{CDCl}_3$ )  $\delta$  165.25, 161.37, 132.04, 130.91, 130.00, 128.26, 127.72, 126.70, 78.93, 67.36, 63.76, 27.95; **HRMS** (ESI-TOF)  $m/z$  Calcd for  $\text{C}_{13}\text{H}_{17}\text{N}_2\text{O}_3$  ( $\text{M}+\text{H}$ ) $^+$ : 249.1234, found: 249.1241.

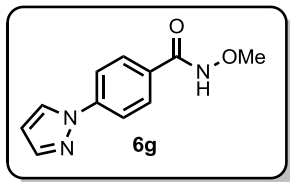

**N-methoxy-4-(1H-pyrazol-1-yl)benzamide (6g)**

Following typical procedure 3:  $^1\text{H}$  NMR (400 MHz, acetone- $d_6$ )  $\delta$  8.43 (dd,  $J = 2.4, 0.4$  Hz, 1H), 7.96 (s, 4H), 7.75 (d,  $J = 1.2$  Hz, 1H), 6.55 (dd,  $J = 2.4, 1.6$  Hz, 1H), 3.81 (s, 3H);  $^{13}\text{C}$  NMR (100 MHz, acetone- $d_6$ )  $\delta$  164.97, 143.33, 142.31, 130.90, 129.41, 128.12, 118.88, 109.03, 64.03; **HRMS** (ESI-TOF)  $m/z$  Calcd for  $\text{C}_{11}\text{H}_{12}\text{N}_3\text{O}_2$  ( $\text{M}+\text{H}$ ) $^+$ : 218.0924, found: 218.0930.

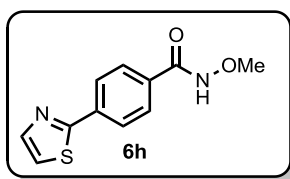

**N-methoxy-4-(thiazol-2-yl)benzamide (6h)**

Following typical procedure 3:  $^1\text{H}$  NMR (400 MHz,  $\text{CDCl}_3$ )  $\delta$  10.45 (br, 1H), 7.91 (d,  $J = 8.0$  Hz, 2H), 7.87 (d,  $J = 3.2$  Hz, 1H), 7.82 (d,  $J = 8.0$  Hz, 2H), 7.38 (d,  $J = 3.2$  Hz, 1H), 3.86 (s, 3H);  $^{13}\text{C}$  NMR (100 MHz,  $\text{CDCl}_3$ )  $\delta$  167.11, 165.84, 144.02, 136.47, 133.04, 128.05, 126.66, 120.08, 64.44; **HRMS** (ESI-TOF)  $m/z$  Calcd for  $\text{C}_{11}\text{H}_{11}\text{N}_2\text{O}_2\text{S}$  ( $\text{M}+\text{H}$ ) $^+$ : 235.0536, found: 235.0540.

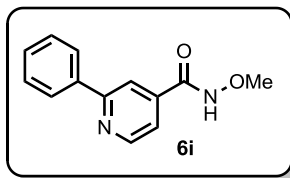

**N-methoxy-5-phenylnicotinamide (6i)**

Following typical procedure 3:  $^1\text{H}$  NMR (400 MHz,  $\text{CDCl}_3$ )  $\delta$  11.94 (br, 1H), 8.59 (d,  $J = 5.2$  Hz, 1H), 8.05 (s, 1H), 7.85-7.83 (m, 2H), 7.51 (dd,  $J = 5.2, 1.6$  Hz, 1H), 7.33-7.31 (m, 3H), 3.78 (s, 3H);  $^{13}\text{C}$  NMR (100 MHz,  $\text{CDCl}_3$ )  $\delta$  164.04, 158.08, 149.77, 139.88, 137.97, 129.38, 128.63, 126.75, 119.43, 118.16, 63.90; **HRMS** (ESI-TOF)  $m/z$  Calcd for  $\text{C}_{13}\text{H}_{13}\text{N}_2\text{O}_2$  ( $\text{M}+\text{H}$ ) $^+$ : 229.0972, found: 229.0979.

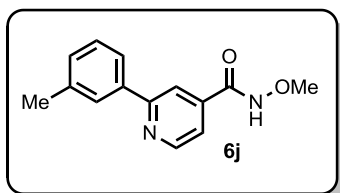

### N-methoxy-2-(m-tolyl)isonicotinamide (6j)

Following typical procedure 3:  $^1\text{H NMR}$  (400 MHz,  $\text{CDCl}_3$ )  $\delta$  11.48 (br, 1H), 8.59 (d,  $J = 5.2$  Hz, 1H), 8.01 (s, 1H), 7.68 (s, 1H), 7.61 (d,  $J = 7.6$  Hz, 1H), 7.46 (d,  $J = 4.4$  Hz, 1H), 7.22 (t,  $J = 7.6$  Hz, 1H), 7.15 (d,  $J = 7.6$  Hz, 1H), 3.79 (s, 3H), 2.31 (s, 3H);  $^{13}\text{C NMR}$  (100 MHz,  $\text{CDCl}_3$ )  $\delta$  164.42, 158.52, 149.92, 140.01, 138.54, 138.12, 130.35, 128.72, 127.63, 124.04, 119.40, 118.37, 64.25, 21.42; **HRMS** (ESI-TOF)  $m/z$  Calcd for  $\text{C}_{14}\text{H}_{15}\text{N}_2\text{O}_2$  ( $\text{M}+\text{H}$ ) $^+$ : 243.1128, found: 243.1134.

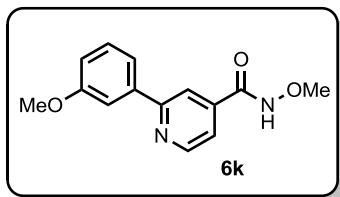

### N-methoxy-2-(3-methoxyphenyl)isonicotinamide (6k)

Following typical procedure 3:  $^1\text{H NMR}$  (400 MHz,  $\text{CDCl}_3$ )  $\delta$  11.30 (br, 1H), 8.60 (d,  $J = 4.8$  Hz, 1H), 7.99 (s, 1H), 7.48 (d,  $J = 4.0$  Hz, 1H), 7.44 (s, 1H), 7.40 (d,  $J = 7.6$  Hz, 1H), 7.25 (t,  $J = 7.6$  Hz, 1H), 6.89 (dd,  $J = 8.0, 2.4$  Hz, 1H), 3.80 (s, 3H), 3.78 (s, 3H);  $^{13}\text{C NMR}$  (100 MHz,  $\text{CDCl}_3$ )  $\delta$  164.41, 160.03, 158.07, 149.93, 140.11, 139.65, 129.87, 119.66, 119.34, 118.41, 115.36, 112.36, 64.30, 55.35; **HRMS** (ESI-TOF)  $m/z$  Calcd for  $\text{C}_{14}\text{H}_{15}\text{N}_2\text{O}_3$  ( $\text{M}+\text{H}$ ) $^+$ : 259.1077, found: 259.1080.

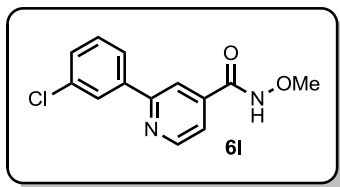

### 2-(3-chlorophenyl)-N-methoxyisonicotinamide (6l)

Following typical procedure 3:  $^1\text{H NMR}$  (400 MHz,  $\text{CDCl}_3$ )  $\delta$  10.52 (br, 1H), 8.70 (d,  $J = 5.2$  Hz, 1H), 8.00 (s, 1H), 7.93 (s, 1H), 7.80 (d,  $J = 6.8$  Hz, 1H), 7.52 (d,  $J = 4.4$  Hz, 1H), 7.37-7.31 (m, 2H), 3.86 (s, 3H);  $^{13}\text{C NMR}$  (100 MHz,  $\text{CDCl}_3$ )  $\delta$  164.27, 156.77, 150.28, 140.13, 139.93, 134.92, 130.12, 129.55, 127.05, 125.03, 120.10, 118.25, 64.39; **HRMS** (ESI-TOF)  $m/z$  Calcd for  $\text{C}_{13}\text{H}_{12}\text{ClN}_2\text{O}_2$  ( $\text{M}+\text{H}$ ) $^+$ : 263.0582, found: 263.0592.

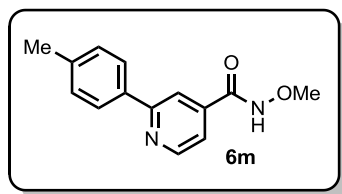

**N-methoxy-2-(p-tolyl)isonicotinamide (6m)**

Following typical procedure 3:  $^1\text{H NMR}$  (400 MHz,  $\text{CDCl}_3$ )  $\delta$  11.84 (br, 1H), 8.56 (d,  $J = 4.8$  Hz, 1H), 8.01 (s, 1H), 7.73 (d,  $J = 8.0$  Hz, 2H), 7.47 (d,  $J = 4.8$  Hz, 1H), 7.12 (d,  $J = 7.6$  Hz, 2H), 3.79 (s, 3H), 2.29 (s, 3H);  $^{13}\text{C NMR}$  (100 MHz,  $\text{CDCl}_3$ )  $\delta$  164.35, 158.19, 149.71, 139.88, 139.57, 135.26, 129.43, 126.69, 119.13, 117.90, 64.00, 21.11; **HRMS** (ESI-TOF)  $m/z$  Calcd for  $\text{C}_{14}\text{H}_{15}\text{N}_2\text{O}_2$  ( $\text{M}+\text{H}$ ) $^+$ : 243.1128, found: 243.1118.

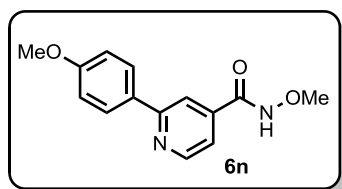

**N-methoxy-2-(4-methoxyphenyl)isonicotinamide (6n)**

Following typical procedure 3:  $^1\text{H NMR}$  (400 MHz,  $\text{CDCl}_3$ )  $\delta$  11.83 (br, 1H), 8.55 (d,  $J = 5.2$  Hz, 1H), 7.98 (s, 1H), 7.80 (d,  $J = 8.8$  Hz, 2H), 7.45 (d,  $J = 5.2$  Hz, 1H), 6.82 (d,  $J = 8.4$  Hz, 2H), 3.81 (s, 3H), 3.72 (s, 3H);  $^{13}\text{C NMR}$  (100 MHz,  $\text{CDCl}_3$ )  $\delta$  164.23, 160.66, 157.75, 149.66, 139.79, 130.52, 128.11, 118.66, 117.34, 114.00, 63.97, 55.11; **HRMS** (ESI-TOF)  $m/z$  Calcd for  $\text{C}_{14}\text{H}_{15}\text{N}_2\text{O}_3$  ( $\text{M}+\text{H}$ ) $^+$ : 259.1077, found: 259.1080.

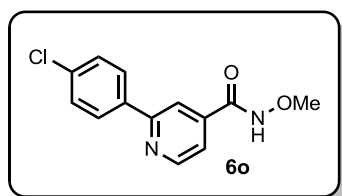

**2-(4-chlorophenyl)-N-methoxyisonicotinamide (6o)**

Following typical procedure 3:  $^1\text{H NMR}$  (400 MHz,  $\text{DMSO}-d_6$ )  $\delta$  12.16 (br, 1H), 8.80 (d,  $J = 4.8$  Hz, 1H), 8.21 (s, 1H), 8.14 (d,  $J = 8.4$  Hz, 2H), 7.66 (d,  $J = 4.4$  Hz, 1H), 7.56 (d,  $J = 8.0$  Hz, 2H), 3.78 (s, 3H);  $^{13}\text{C NMR}$  (100 MHz,  $\text{DMSO}-d_6$ )  $\delta$  162.04, 155.51, 150.43, 140.60, 136.82, 134.44, 128.90, 128.42, 120.22, 117.35, 63.48; **HRMS** (ESI-TOF)  $m/z$  Calcd for  $\text{C}_{13}\text{H}_{12}\text{ClN}_2\text{O}_2$  ( $\text{M}+\text{H}$ ) $^+$ : 263.0582, found: 263.0592.

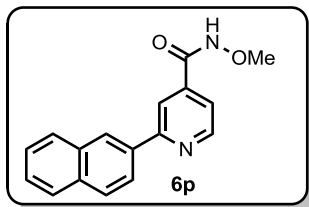

### N-methoxy-2-(naphthalen-2-yl)isonicotinamide (6p)

Following typical procedure 2:  $^1\text{H NMR}$  (400 MHz, acetone- $d_6$ )  $\delta$  11.33 (br, 1H), 8.84 (d,  $J$  = 4.8 Hz, 1H), 8.69 (s, 1H), 8.41 (s, 1H), 8.32 (d,  $J$  = 8.4 Hz, 1H), 8.01 (d,  $J$  = 8.4 Hz, 2H), 7.94 (dd,  $J$  = 5.2, 3.2 Hz, 1H), 7.70 (d,  $J$  = 4.4 Hz, 1H), 7.55 (dd,  $J$  = 6.0, 2.8 Hz, 2H), 3.88 (s, 3H);  $^{13}\text{C NMR}$  (100 MHz, acetone- $d_6$ )  $\delta$  164.59, 159.04, 152.04, 142.52, 137.52, 135.54, 135.14, 130.33, 129.98, 129.23, 128.42, 128.06, 127.93, 125.94, 121.32, 119.22, 65.00; **HRMS** (ESI-TOF)  $m/z$  Calcd for  $\text{C}_{17}\text{H}_{15}\text{N}_2\text{O}_2$  ( $\text{M}+\text{H}$ ) $^+$ : 279.1128, found: 279.1128.

## 3.2 Characterization of Products

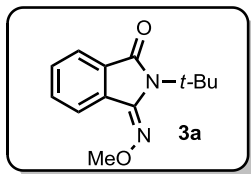

### (E)-2-(tert-butyl)-3-(methoxyimino)isoindolin-1-one (3a)

$^1\text{H NMR}$  (400 MHz,  $\text{CDCl}_3$ )  $\delta$  8.26-8.24 (m, 1H), 7.77-7.75 (m, 1H), 7.58-7.50 (m, 2H), 4.06 (s, 3H), 1.76 (s, 9H);  $^{13}\text{C NMR}$  (100 MHz,  $\text{CDCl}_3$ )  $\delta$  167.33, 149.98, 132.78, 131.74, 131.10, 128.53, 127.73, 122.65, 63.24, 58.65, 29.60; **HRMS** (ESI-TOF)  $m/z$  Calcd for  $\text{C}_{13}\text{H}_{17}\text{N}_2\text{O}_2$  ( $\text{M}+\text{H}$ ) $^+$ : 233.1285, found: 233.1276.

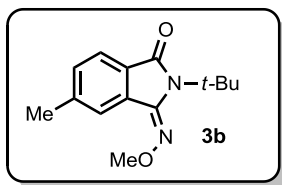

### (E)-2-(tert-butyl)-3-(methoxyimino)-5-methylisoindolin-1-one (3b)

$^1\text{H NMR}$  (400 MHz,  $\text{CDCl}_3$ )  $\delta$  8.07 (s, 1H), 7.64 (d,  $J$  = 7.6 Hz, 1H), 7.34 (d,  $J$  = 7.6 Hz, 1H), 4.07 (s, 3H), 2.46 (s, 3H), 1.74 (s, 9H);  $^{13}\text{C NMR}$  (100 MHz,  $\text{CDCl}_3$ )  $\delta$  167.58, 150.14, 143.63,

132.01, 129.43, 128.93, 128.23, 122.61, 63.33, 58.64, 29.68, 22.17; **HRMS** (ESI-TOF)  $m/z$  Calcd for  $C_{14}H_{19}N_2O_2$  (M+H)<sup>+</sup>: 247.1441, found: 247.1452.

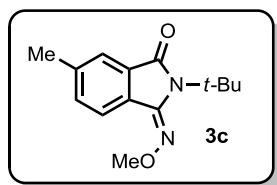

**(E)-2-(tert-butyl)-3-(methoxyimino)-6-methylisoindolin-1-one (3c)**

**<sup>1</sup>H NMR** (400 MHz,  $CDCl_3$ )  $\delta$  8.11 (d,  $J = 7.6$  Hz, 1H), 7.55 (s, 1H), 7.36 (dd,  $J = 8.0, 0.8$  Hz, 1H), 4.05 (s, 3H), 2.44 (s, 3H), 1.75 (s, 9H); **<sup>13</sup>C NMR** (100 MHz,  $CDCl_3$ )  $\delta$  167.63, 150.25, 141.86, 133.63, 132.12, 127.58, 126.18, 123.09, 63.23, 58.66, 29.70, 21.81; **HRMS** (ESI-TOF)  $m/z$  Calcd for  $C_{14}H_{19}N_2O_2$  (M+H)<sup>+</sup>: 247.1441, found: 247.1452.

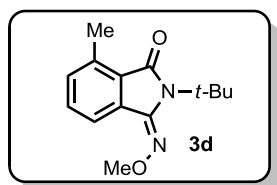

**(E)-2-(tert-butyl)-3-(methoxyimino)-7-methylisoindolin-1-one (3d)**

10 mol % of  $Pd_2(dba)_3$  was used at 100 °C for 10 h. **<sup>1</sup>H NMR** (400 MHz,  $CDCl_3$ )  $\delta$  8.13 (d,  $J = 7.6$  Hz, 1H), 7.43 (t,  $J = 7.6$  Hz, 1H), 7.28 (d,  $J = 7.6$  Hz, 1H), 4.05 (s, 3H), 2.67 (s, 3H), 1.75 (s, 9H); **<sup>13</sup>C NMR** (100 MHz,  $CDCl_3$ )  $\delta$  168.37, 149.80, 137.14, 133.71, 132.35, 129.10, 128.40, 125.51, 63.30, 58.58, 29.73, 17.90; **HRMS** (ESI-TOF)  $m/z$  Calcd for  $C_{14}H_{19}N_2O_2$  (M+H)<sup>+</sup>: 247.1441, found: 247.1451.

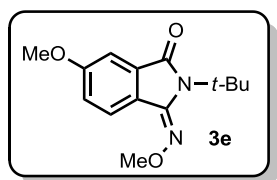

**(E)-2-(tert-butyl)-6-methoxy-3-(methoxyimino)isoindolin-1-one (3e)**

The reaction time was 2 h. **<sup>1</sup>H NMR** (400 MHz,  $CDCl_3$ )  $\delta$  8.14 (d,  $J = 8.4$  Hz, 1H), 7.24 (d,  $J = 2.8$  Hz, 1H), 7.07 (dd,  $J = 8.8, 2.8$  Hz, 1H), 4.04 (s, 3H), 3.88 (s, 3H), 1.75 (s, 9H); **<sup>13</sup>C NMR** (100 MHz,  $CDCl_3$ )  $\delta$  167.38, 162.17, 150.03, 134.01, 129.18, 121.39, 119.99, 106.15, 63.22,

58.80, 55.85, 29.76; **HRMS** (ESI-TOF)  $m/z$  Calcd for  $C_{14}H_{19}N_2O_3$  (M+H)<sup>+</sup>: 263.1390, found: 263.1391

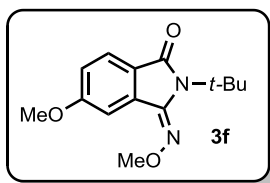

**(E)-2-(tert-butyl)-5-methoxy-3-(methoxyimino)isoindolin-1-one (3f)**

**<sup>1</sup>H NMR** (400 MHz, CDCl<sub>3</sub>) δ 7.79 (d,  $J$  = 2.4 Hz, 1H), 7.67 (d,  $J$  = 8.4 Hz, 1H), 7.04 (dd,  $J$  = 8.4, 2.4 Hz, 1H), 4.06 (s, 3H), 3.88 (s, 3H), 1.74 (s, 9H); **<sup>13</sup>C NMR** (100 MHz, CDCl<sub>3</sub>) δ 167.39, 163.61, 149.87, 130.41, 124.19, 117.20, 112.93, 63.41, 58.63, 55.93, 29.66; **HRMS** (ESI-TOF)  $m/z$  Calcd for  $C_{14}H_{19}N_2O_3$  (M+H)<sup>+</sup>: 263.1390, found: 263.1398.

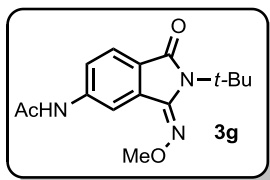

**(E)-N-(2-(tert-butyl)-3-(methoxyimino)-1-oxoisoindolin-5-yl)acetamide (3g)**

The reaction time was 2 h. **<sup>1</sup>H NMR** (400 MHz, CDCl<sub>3</sub>) δ 8.42 (d,  $J$  = 1.2 Hz, 1H), 8.18 (br, 1H), 7.80 (dd,  $J$  = 8.4, 1.2 Hz, 1H), 7.67 (d,  $J$  = 8.4 Hz, 1H), 4.02 (s, 3H), 2.22 (s, 3H), 1.74 (s, 9H); **<sup>13</sup>C NMR** (100 MHz, CDCl<sub>3</sub>) δ 168.97, 167.17, 149.57, 142.47, 129.45, 127.15, 123.60, 122.23, 118.73, 63.43, 58.84, 29.64, 24.78; **HRMS** (ESI-TOF)  $m/z$  Calcd for  $C_{15}H_{20}N_3O_3$  (M+H)<sup>+</sup>: 290.1499, found: 290.1503.

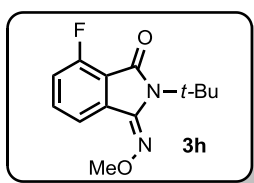

**(E)-2-(tert-butyl)-7-fluoro-3-(methoxyimino)isoindolin-1-one (3h)**

10 mol % of Pd<sub>2</sub>(dba)<sub>3</sub> was used at 100 °C for 10 h. **<sup>1</sup>H NMR** (400 MHz, CDCl<sub>3</sub>) δ 8.09 (d,  $J$  = 7.6 Hz, 1H), 7.58-7.30 (m, 1H), 7.21-7.17 (m, 1H), 4.07 (s, 3H), 1.75 (s, 9H); **<sup>13</sup>C NMR** (100 MHz, CDCl<sub>3</sub>) δ 164.32 (d,  $J$  = 2.3 Hz), 158.06 (d,  $J$  = 260.5 Hz), 149.03 (d,  $J$  = 1.9 Hz), 134.91 (d,  $J$  = 7.4 Hz), 130.67 (d,  $J$  = 2.4 Hz), 124.05 (d,  $J$  = 4.1 Hz), 119.01 (d,  $J$  = 19.2 Hz), 118.10 (d,

$J = 11.4$  Hz), 63.52, 59.13, 29.58; **HRMS** (ESI-TOF)  $m/z$  Calcd for  $C_{13}H_{16}FN_2O_2$  (M+H)<sup>+</sup>: 251.1190, found: 251.1199.

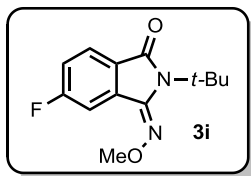

**(E)-2-(tert-butyl)-5-fluoro-3-(methoxyimino)isoindolin-1-one (3i)**

The reaction time was 6 h. **<sup>1</sup>H NMR** (400 MHz,  $CDCl_3$ )  $\delta$  7.96 (dd,  $J = 8.8, 2.4$  Hz, 1H), 7.74 (dd,  $J = 8.4, 4.8$  Hz, 1H), 7.23 (td,  $J = 8.4, 2.4$  Hz, 1H), 4.07 (s, 3H), 1.74 (s, 9H); **<sup>13</sup>C NMR** (100 MHz,  $CDCl_3$ )  $\delta$  166.88, 165.42 (d,  $J = 207.2$  Hz), 149.08 (d,  $J = 3.0$  Hz), 130.24 (d,  $J = 11.3$  Hz), 127.72 (d,  $J = 2.2$  Hz), 124.74 (d,  $J = 9.6$  Hz), 118.59 (d,  $J = 23.5$  Hz), 115.24 (d,  $J = 26.3$  Hz), 63.51, 59.01, 29.58; **HRMS** (ESI-TOF)  $m/z$  Calcd for  $C_{13}H_{16}FN_2O_2$  (M+H)<sup>+</sup>: 251.1190, found: 251.1196.

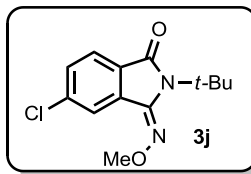

**(E)-2-(tert-butyl)-5-chloro-3-(methoxyimino)isoindolin-1-one (3j)**

The reaction time was 6 h. **<sup>1</sup>H NMR** (400 MHz,  $CDCl_3$ )  $\delta$  8.26 (dd,  $J = 1.6, 0.4$  Hz, 1H), 7.69 (dd,  $J = 8.0, 0.4$  Hz, 1H), 7.51 (dd,  $J = 8.0, 2.0$  Hz, 1H), 4.08 (s, 3H), 1.74 (s, 9 H); **<sup>13</sup>C NMR** (100 MHz,  $CDCl_3$ )  $\delta$  166.44, 148.93, 139.01, 131.45, 130.05, 129.69, 127.96, 123.94, 63.56, 59.08, 29.58; **HRMS** (ESI-TOF)  $m/z$  Calcd for  $C_{13}H_{16}ClN_2O_2$  (M+H)<sup>+</sup>: 267.0895, found: 267.0894.

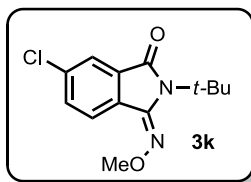

**(E)-2-(tert-butyl)-6-chloro-3-(methoxyimino)isoindolin-1-one (3k)**

The reaction time was 6 h. **<sup>1</sup>H NMR** (400 MHz,  $CDCl_3$ )  $\delta$  8.18 (d,  $J = 8.4$  Hz, 1H), 7.71 (d,  $J = 2.0$  Hz, 1H), 7.52 (dd,  $J = 8.4, 2.0$  Hz, 1H), 4.07 (s, 3H), 1.74 (s, 9H); **<sup>13</sup>C NMR** (100 MHz,



CDCl<sub>3</sub>)  $\delta$  166.05, 149.24, 137.45, 133.47, 132.90, 128.99, 126.66, 123.03, 63.48, 59.12, 29.61; **HRMS** (ESI-TOF)  $m/z$  Calcd for C<sub>13</sub>H<sub>16</sub>ClN<sub>2</sub>O<sub>2</sub> (M+H)<sup>+</sup>: 267.0895, found:267.0894.

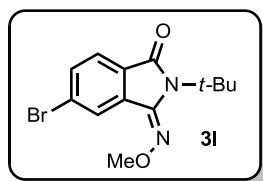

**(E)-5-bromo-2-(tert-butyl)-3-(methoxyimino)isoindolin-1-one (3l)**

5 mol % of Pd<sub>2</sub>(dba)<sub>3</sub> was used at 80 °C for 6 h. **<sup>1</sup>H NMR** (400 MHz, CDCl<sub>3</sub>)  $\delta$  8.42 (d,  $J$  = 1.2 Hz, 1H), 7.68 (dd,  $J$  = 8.0, 1.6 Hz, 1H), 7.62 (d,  $J$  = 8.0 Hz, 1H), 4.08 (s, 3H), 1.74 (s, 9H); **<sup>13</sup>C NMR** (100 MHz, CDCl<sub>3</sub>)  $\delta$  166.54, 148.83, 134.34, 130.79, 130.50, 129.87, 127.40, 124.15, 63.58, 59.09, 29.58; **HRMS** (ESI-TOF)  $m/z$  Calcd for C<sub>13</sub>H<sub>16</sub>BrN<sub>2</sub>O<sub>2</sub> (M+H)<sup>+</sup>: 311.0390, found: 311.0401.

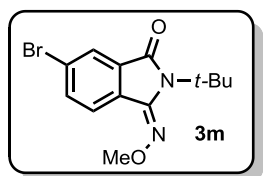

**(E)-6-bromo-2-(tert-butyl)-3-(methoxyimino)isoindolin-1-one (3m)**

10 mol % of Pd<sub>2</sub>(dba)<sub>3</sub> was used at 100 °C for 6 h. **<sup>1</sup>H NMR** (400 MHz, CDCl<sub>3</sub>)  $\delta$  8.12 (d,  $J$  = 8.4 Hz, 1H), 7.88 (d,  $J$  = 2.0 Hz, 1H), 7.69 (dd,  $J$  = 8.0, 1.6 Hz, 1H), 4.07 (s, 3H), 1.74 (s, 9H); **<sup>13</sup>C NMR** (100 MHz, CDCl<sub>3</sub>)  $\delta$  165.97, 149.35, 135.82, 133.56, 129.19, 127.11, 126.08, 125.62, 63.52, 59.14, 29.63; **HRMS** (ESI-TOF)  $m/z$  Calcd for C<sub>13</sub>H<sub>16</sub>BrN<sub>2</sub>O<sub>2</sub> (M+H)<sup>+</sup>: 311.0390, found: 311.0399.

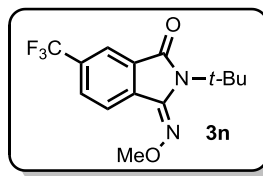

**(E)-2-(tert-butyl)-3-(methoxyimino)-6-(trifluoromethyl)isoindolin-1-one (3n)**

10 mol % of Pd<sub>2</sub>(dba)<sub>3</sub> was used at 80 °C for 10 h. **<sup>1</sup>H NMR** (400 MHz, CDCl<sub>3</sub>)  $\delta$  8.39 (d,  $J$  = 8.0 Hz, 1H), 8.03 (s, 1H), 7.83 (d,  $J$  = 8.0 Hz, 1H), 4.10 (s, 3H), 1.76 (s, 9H); **<sup>13</sup>C NMR** (100 MHz, CDCl<sub>3</sub>)  $\delta$  165.99, 149.01, 133.22 (q,  $J$  = 32.9 Hz), 132.40, 131.09, 129.74 (q,  $J$  = 3.7 Hz),

128.35, 123.57 (q,  $J = 271.2$  Hz), 120.05 (q,  $J = 3.9$  Hz), 63.69, 59.34, 29.58; **HRMS** (ESI-TOF)  $m/z$  Calcd for  $C_{14}H_{16}F_3N_2O_2$  (M+H)<sup>+</sup>: 301.1158, found: 301.1159.

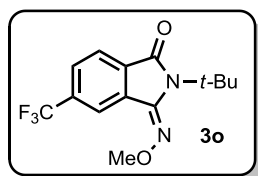

**(E)-2-(tert-butyl)-3-(methoxyimino)-5-(trifluoromethyl)isoindolin-1-one (3o)**

The reaction time was 6 h. **<sup>1</sup>H NMR** (400 MHz, CDCl<sub>3</sub>) δ 8.52 (s, 1H), 7.88 (d,  $J = 8.0$  Hz, 1H), 7.81 (d,  $J = 8.0$  Hz, 1H), 4.13 (s, 3H), 1.78 (s, 9H); **<sup>13</sup>C NMR** (100 MHz, CDCl<sub>3</sub>) δ 165.81, 148.72, 134.61 (q,  $J = 32.2$  Hz), 134.46, 128.62, 128.12 (q,  $J = 3.5$  Hz), 124.93 (q,  $J = 3.9$  Hz), 123.65 (q,  $J = 271.5$  Hz), 123.19, 63.55, 59.24, 29.43; **HRMS** (ESI-TOF)  $m/z$  Calcd for  $C_{14}H_{16}F_3N_2O_2$  (M+H)<sup>+</sup>: 301.1158, found: 301.1168.

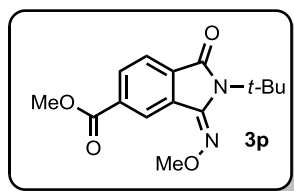

**(E)-methyl 2-(tert-butyl)-3-(methoxyimino)-1-oxoisoindoline-5-carboxylate (3p)**

The reaction time was 3 h. **<sup>1</sup>H NMR** (400 MHz, CDCl<sub>3</sub>) δ 8.87 (t,  $J = 0.8$  Hz, 1H), 8.23 (dd,  $J = 8.0, 0.8$  Hz, 1H), 7.83 (d,  $J = 8.0$  Hz, 1H), 4.11 (s, 3H), 3.97 (s, 3H), 1.76 (s, 9H); **<sup>13</sup>C NMR** (100 MHz, CDCl<sub>3</sub>) δ 166.41, 166.30, 149.17, 135.24, 134.37, 132.58, 129.09, 128.50, 122.77, 63.65, 59.26, 52.73, 29.63; **HRMS** (ESI-TOF)  $m/z$  Calcd for  $C_{15}H_{19}N_2O_4$  (M+H)<sup>+</sup>: 291.1339, found: 291.1337.

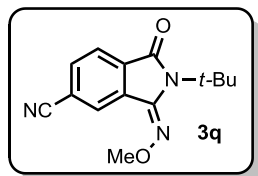

**(E)-2-(tert-butyl)-3-(methoxyimino)-1-oxoisoindoline-5-carbonitrile (3q)**

5 mol % of Pd<sub>2</sub>(dba)<sub>3</sub> was used at 80 °C for 6 h. **<sup>1</sup>H NMR** (400 MHz, CDCl<sub>3</sub>) δ 8.60 (s, 1H), 7.88 (d,  $J = 8.0$  Hz, 1H), 7.84 (d,  $J = 8.0$  Hz, 1H), 4.12 (s, 3H), 1.76 (s, 9H); **<sup>13</sup>C NMR** (100

MHz, CDCl<sub>3</sub>) δ 165.47, 148.30, 134.78, 134.76, 131.69, 128.61, 123.55, 118.08, 116.40, 63.76, 59.55, 29.48; **HRMS** (ESI-TOF) *m/z* Calcd for C<sub>14</sub>H<sub>16</sub>N<sub>3</sub>O<sub>2</sub> (M+H)<sup>+</sup>: 258.1237, found: 258.1240.

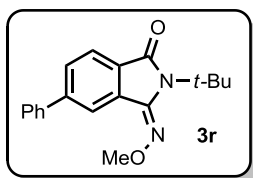

**(E)-2-(tert-butyl)-3-(methoxyimino)-5-phenylisoindolin-1-one (3r)**

**<sup>1</sup>H NMR** (400 MHz, CDCl<sub>3</sub>) δ 8.48 (dd, *J* = 1.6, 0.8 Hz, 1H), 7.82 (dd, *J* = 8.0, 0.8 Hz, 1H), 7.74 (dd, *J* = 8.0, 1.6 Hz, 1H), 7.62-7.60 (m, 2H), 7.50-7.46 (m, 2H), 7.43-7.39 (m, 1H), 4.08 (s, 3H), 1.77 (s, 9H); **<sup>13</sup>C NMR** (100 MHz, CDCl<sub>3</sub>) δ 167.37, 149.95, 146.37, 140.51, 130.59, 130.33, 129.30, 129.07, 128.26, 127.68, 126.68, 123.14, 63.49, 58.87, 29.69; **HRMS** (ESI-TOF) *m/z* Calcd for C<sub>19</sub>H<sub>21</sub>N<sub>2</sub>O<sub>2</sub> (M+H)<sup>+</sup>: 309.1598, found: 309.1611.

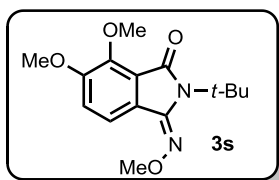

**(E)-2-(tert-butyl)-6,7-dimethoxy-3-(methoxyimino)isoindolin-1-one (3s)**

5 mol % of Pd<sub>2</sub>(dba)<sub>3</sub> was used at 80 °C for 12 h. **<sup>1</sup>H NMR** (400 MHz, CDCl<sub>3</sub>) δ 8.00 (d, *J* = 8.4 Hz, 1H), 7.05 (d, *J* = 8.4 Hz, 1H), 4.03 (s, 3H), 4.02 (s, 3H), 3.92 (s, 3H), 1.74 (s, 9H); **<sup>13</sup>C NMR** (100 MHz, CDCl<sub>3</sub>) δ 165.51, 155.36, 149.31, 146.43, 124.25, 123.54, 122.17, 116.03, 63.19, 62.24, 58.77, 56.53, 29.71; **HRMS** (ESI-TOF) *m/z* Calcd for C<sub>15</sub>H<sub>21</sub>N<sub>2</sub>O<sub>4</sub> (M+H)<sup>+</sup>: 293.1496, found: 293.1484.

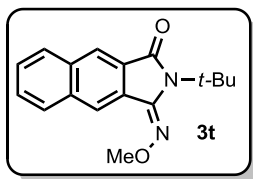

**(E)-2-(tert-butyl)-3-(methoxyimino)-2,3-dihydro-1H-benzo[f]isoindol-1-one (3t)**

The reaction time was 2 h. **<sup>1</sup>H NMR** (400 MHz, CDCl<sub>3</sub>) δ 8.76 (s, 1H), 8.24 (s, 1H), 7.99-7.96 (m, 2H), 7.62-7.56 (m, 2H), 4.13 (s, 3H), 1.81 (s, 9H); **<sup>13</sup>C NMR** (100 MHz, CDCl<sub>3</sub>) δ 167.39, 149.95, 135.89, 134.14, 129.81, 129.67, 128.86, 128.64, 128.07, 127.97, 124.43, 123.31, 63.41, 59.09, 29.61; **HRMS** (ESI-TOF) *m/z* Calcd for C<sub>17</sub>H<sub>19</sub>N<sub>2</sub>O<sub>2</sub> (M+H)<sup>+</sup>: 283.1441, found: 283.1442.

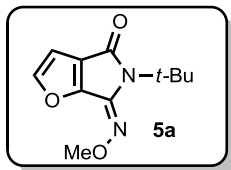

**(E)-5-(tert-butyl)-6-(methoxyimino)-5,6-dihydro-4H-furo[2,3-c]pyrrol-4-one (5a)**

$^1\text{H NMR}$  (400 MHz,  $\text{CDCl}_3$ )  $\delta$  7.60 (d,  $J = 1.6$  Hz, 1H), 6.59 (d,  $J = 2.0$  Hz, 1H), 4.06 (s, 3H), 1.68 (s, 9H);  $^{13}\text{C NMR}$  (100 MHz,  $\text{CDCl}_3$ )  $\delta$  162.24, 153.64, 150.17, 143.60, 125.37, 106.00, 63.63, 59.11, 29.94; **HRMS** (ESI-TOF)  $m/z$  Calcd for  $\text{C}_{11}\text{H}_{15}\text{N}_2\text{O}_3$  ( $\text{M}+\text{H}$ ) $^+$ : 223.1077, found: 223.1076.

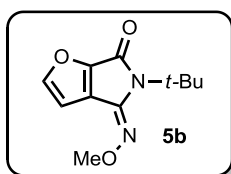

**(E)-5-(tert-butyl)-4-(methoxyimino)-4H-furo[2,3-c]pyrrol-6(5H)-one (5b)**

The reaction time was 1 h.  $^1\text{H NMR}$  (400 MHz,  $\text{CDCl}_3$ )  $\delta$  7.60 (d,  $J = 2.0$  Hz, 1H), 6.70 (d,  $J = 1.6$  Hz, 1H), 4.01 (s, 3H), 1.69 (s, 9H);  $^{13}\text{C NMR}$  (100 MHz,  $\text{CDCl}_3$ )  $\delta$  157.64, 152.09, 150.30, 146.32, 124.00, 109.02, 63.15, 59.29, 29.95; **HRMS** (ESI-TOF)  $m/z$  Calcd for  $\text{C}_{11}\text{H}_{15}\text{N}_2\text{O}_3$  ( $\text{M}+\text{H}$ ) $^+$ : 223.1077, found: 223.1079.

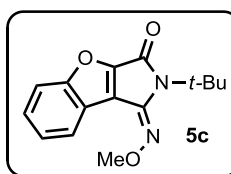

**(E)-2-(tert-butyl)-1-(methoxyimino)-1H-benzofuro[2,3-c]pyrrol-3(2H)-one (5c)**

The reaction time was 2 h.  $^1\text{H NMR}$  (400 MHz,  $\text{CDCl}_3$ )  $\delta$  7.82-7.80 (m, 1H), 7.60 (d,  $J = 8.4$  Hz, 1H), 7.47-7.42 (m, 1H), 7.39-7.35 (m, 1H), 4.17 (s, 3H), 1.75 (s, 9H);  $^{13}\text{C NMR}$  (100 MHz,  $\text{CDCl}_3$ )  $\delta$  160.94, 158.47, 153.57, 146.84, 127.58, 124.62, 123.88, 121.92, 119.88, 113.16, 63.22, 59.74, 30.06; **HRMS** (ESI-TOF)  $m/z$  Calcd for  $\text{C}_{15}\text{H}_{17}\text{N}_2\text{O}_3$  ( $\text{M}+\text{H}$ ) $^+$ : 273.1234, found: 273.1235.

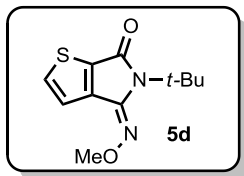

**(E)-5-(tert-butyl)-4-(methoxyimino)-4H-thieno[2,3-c]pyrrol-6(5H)-one (5d)**

**<sup>1</sup>H NMR** (400 MHz, CDCl<sub>3</sub>) δ 7.59 (d, *J* = 4.8 Hz, 1H), 7.43 (d, *J* = 4.8 Hz, 1H), 4.03 (s, 3H), 1.72 (s, 9H); **<sup>13</sup>C NMR** (100 MHz, CDCl<sub>3</sub>) δ 162.67, 148.29, 138.62, 138.26, 134.83, 124.74, 63.17, 59.22, 29.84; **HRMS** (ESI-TOF) *m/z* Calcd for C<sub>11</sub>H<sub>15</sub>N<sub>2</sub>O<sub>2</sub>S (M+H)<sup>+</sup>: 239.0849, found: 239.0860.

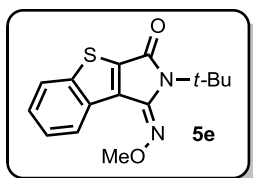

**(E)-2-(tert-butyl)-1-(methoxyimino)-1H-benzo[4,5]thieno[2,3-c]pyrrol-3(2H)-one (5e)**

**<sup>1</sup>H NMR** (400 MHz, CDCl<sub>3</sub>) δ 8.43-8.41 (m, 1H), 7.88-7.86 (m, 1H), 7.48-7.42 (m, 2H), 4.18 (s, 3H), 1.78 (s, 9H); **<sup>13</sup>C NMR** (100 MHz, CDCl<sub>3</sub>) δ 163.07, 147.97, 145.91, 140.78, 133.88, 132.17, 127.04, 126.67, 125.58, 123.86, 63.08, 59.69, 30.04; **HRMS** (ESI-TOF) *m/z* Calcd for C<sub>15</sub>H<sub>17</sub>N<sub>2</sub>O<sub>2</sub>S (M+H)<sup>+</sup>: 289.1005, found: 289.1003.

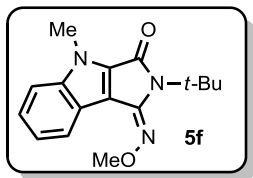

**(E)-2-(tert-butyl)-1-(methoxyimino)-4-methyl-1,2-dihydropyrrolo[3,4-b]indol-3(4H)-one (5f)**

**<sup>1</sup>H NMR** (400 MHz, CDCl<sub>3</sub>) δ 8.02 (d, *J* = 8.0 Hz, 1H), 7.48-7.33 (m, 3H), 4.05 (s, 3H), 4.03 (s, 3H), 1.65 (s, 9H); **<sup>13</sup>C NMR** (100 MHz, CDCl<sub>3</sub>) δ 157.98, 143.16, 142.34, 134.95, 124.72, 122.85, 122.78, 121.75, 111.54, 107.97, 64.99, 54.34, 31.13, 30.87; **HRMS** (ESI-TOF) *m/z* Calcd for C<sub>16</sub>H<sub>20</sub>N<sub>3</sub>O<sub>2</sub> (M+H)<sup>+</sup>: 286.1550, found: 286.1538.

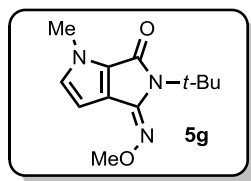

**(E)-5-(tert-butyl)-4-(methoxyimino)-1-methyl-4,5-dihydropyrrolo[3,4-b]pyrrol-6(1H)-one (5g)**

$^1\text{H NMR}$  (400 MHz,  $\text{CDCl}_3$ )  $\delta$  6.87 (d,  $J = 2.4$  Hz, 1H), 6.32 (d,  $J = 2.4$  Hz, 1H), 3.96 (s, 3H), 3.87 (s, 3H), 1.47 (s, 9H);  $^{13}\text{C NMR}$  (100 MHz,  $\text{CDCl}_3$ )  $\delta$  157.72, 143.73, 130.35, 127.89, 118.45, 108.02, 64.77, 54.50, 34.69, 30.17; **HRMS** (ESI-TOF)  $m/z$  Calcd for  $\text{C}_{12}\text{H}_{18}\text{N}_3\text{O}_2$  ( $\text{M}+\text{H}$ ) $^+$ : 236.1394, found: 236.1396.

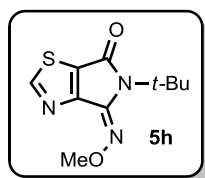

**(E)-5-(tert-butyl)-4-(methoxyimino)-4H-pyrrolo[3,4-d]thiazol-6(5H)-one (5h)**

5 mol % of  $\text{Pd}_2(\text{dba})_3$  was used at 80 °C for 8 h.  $^1\text{H NMR}$  (400 MHz,  $\text{CDCl}_3$ )  $\delta$  9.12 (s, 1H), 4.15 (s, 3H), 1.74 (s, 9H);  $^{13}\text{C NMR}$  (100 MHz,  $\text{CDCl}_3$ )  $\delta$  162.01, 160.30, 154.59, 145.26, 133.06, 64.22, 60.09, 29.90; **HRMS** (ESI-TOF)  $m/z$  Calcd for  $\text{C}_{10}\text{H}_{14}\text{N}_3\text{O}_2\text{S}$  ( $\text{M}+\text{H}$ ) $^+$ : 240.0801, found: 240.0808.

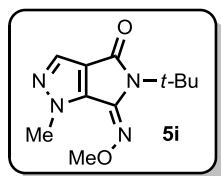

**(E)-5-(tert-butyl)-6-(methoxyimino)-1-methyl-5,6-dihydropyrrolo[3,4-c]pyrazol-4(1H)-one (5i)**

$^1\text{H NMR}$  (400 MHz,  $\text{CDCl}_3$ )  $\delta$  7.54 (s, 1H), 4.16 (s, 3H), 4.02 (s, 3H), 1.68 (s, 9H);  $^{13}\text{C NMR}$  (100 MHz,  $\text{CDCl}_3$ )  $\delta$  161.70, 143.03, 140.30, 132.27, 122.79, 62.83, 59.10, 41.73, 29.75; **HRMS** (ESI-TOF)  $m/z$  Calcd for  $\text{C}_{11}\text{H}_{17}\text{N}_4\text{O}_2$  ( $\text{M}+\text{H}$ ) $^+$ : 237.1346, found: 237.1351.

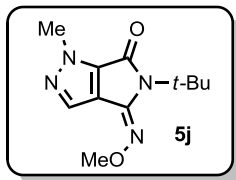

**(E)-5-(tert-butyl)-4-(methoxyimino)-1-methyl-4,5-dihydropyrrolo[3,4-c]pyrazol-6(1H)-one (5j)**

$^1\text{H NMR}$  (400 MHz,  $\text{CDCl}_3$ )  $\delta$  7.59 (s, 1H), 4.02 (s, 3H), 4.01 (s, 3H), 1.70 (s, 9H);  $^{13}\text{C NMR}$  (100 MHz,  $\text{CDCl}_3$ )  $\delta$  157.89, 146.29, 139.44, 134.44, 118.43, 63.05, 59.46, 37.24, 29.78; **HRMS** (ESI-TOF)  $m/z$  Calcd for  $\text{C}_{11}\text{H}_{17}\text{N}_4\text{O}_2$  ( $\text{M}+\text{H}$ ) $^+$ : 237.1346, found: 237.1349.

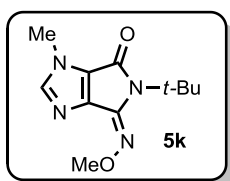

**(E)-5-(tert-butyl)-6-(methoxyimino)-3-methyl-5,6-dihydropyrrolo[3,4-d]imidazol-4(3H)-one (5k)**

10 mol % of  $\text{Pd}_2(\text{dba})_3$  was used at 100 °C for 10 h.  $^1\text{H NMR}$  (400 MHz,  $\text{CDCl}_3$ )  $\delta$  7.62 (s, 1H), 4.09 (s, 3H), 3.83 (s, 3H), 1.70 (s, 9H);  $^{13}\text{C NMR}$  (100 MHz,  $\text{CDCl}_3$ )  $\delta$  158.90, 145.60, 145.50, 142.38, 130.01, 63.76, 59.24, 32.55, 30.04; **HRMS** (ESI-TOF)  $m/z$  Calcd for  $\text{C}_{11}\text{H}_{17}\text{N}_4\text{O}_2$  ( $\text{M}+\text{H}$ ) $^+$ : 237.1346, found: 237.1348.

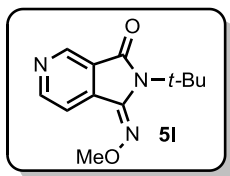

**(E)-2-(tert-butyl)-1-(methoxyimino)-1H-pyrrolo[3,4-c]pyridin-3(2H)-one (5l)**

10 mol % of  $\text{Pd}_2(\text{dba})_3$  was used at 100 °C for 11 h.  $^1\text{H NMR}$  (400 MHz,  $\text{CDCl}_3$ )  $\delta$  9.05 (d,  $J$  = 1.2 Hz, 1H), 8.86 (d,  $J$  = 5.2 Hz, 1H), 8.09 (dd,  $J$  = 5.2, 1.2 Hz, 1H), 4.10 (s, 3H), 1.74 (s, 9H);  $^{13}\text{C NMR}$  (100 MHz,  $\text{CDCl}_3$ )  $\delta$  166.10, 154.00, 148.86, 145.15, 134.92, 125.89, 121.33, 63.80, 59.34, 29.44; **HRMS** (ESI-TOF)  $m/z$  Calcd for  $\text{C}_{12}\text{H}_{16}\text{N}_3\text{O}_2$  ( $\text{M}+\text{H}$ ) $^+$ : 234.1237, found: 234.1233.

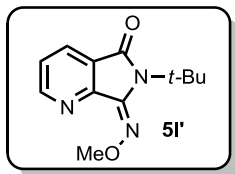

**(E)-6-(tert-butyl)-7-(methoxyimino)-6,7-dihydro-5H-pyrrolo[3,4-b]pyridin-5-one (5l')**

10 mol % of Pd<sub>2</sub>(dba)<sub>3</sub> was used at 100 °C for 11 h. This byproduct was isolated as a mixture of inseparable E:Z isomers of ratio 12:1. <sup>1</sup>H NMR (400 MHz, CDCl<sub>3</sub>) δ 8.95 (dd, *J* = 4.8, 1.6 Hz, 1H), 8.08 (dd, *J* = 7.6, 1.6 Hz, 1H), 7.46 (dd, *J* = 7.6, 4.8 Hz, 1H), 4.19 (s, 3H), 1.78 (s, 9H); <sup>13</sup>C NMR (100 MHz, CDCl<sub>3</sub>) δ 174.57, 164.92, 158.89, 154.34, 151.24, 150.87, 148.69, 147.35, 136.25, 131.04, 126.62, 125.22, 122.99, 64.74, 59.55, 30.04, 29.72; HRMS (ESI-TOF) *m/z* Calcd for HRMS (ESI-TOF) *m/z* Calcd for C<sub>12</sub>H<sub>16</sub>N<sub>3</sub>O<sub>2</sub> (M+H)<sup>+</sup>: 234.1237, found: 234.1233.

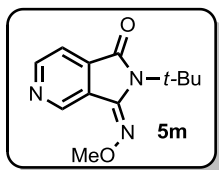

**(E)-2-(tert-butyl)-3-(methoxyimino)-2,3-dihydro-1H-pyrrolo[3,4-c]pyridin-1-one (5m)**

The reaction time was 10 h. <sup>1</sup>H NMR (400 MHz, CDCl<sub>3</sub>) δ 9.50 (s, 1H), 8.85 (d, *J* = 4.8 Hz, 1H), 7.68-7.67 (m, 1H), 4.13 (s, 3H), 1.76 (s, 9H); <sup>13</sup>C NMR (100 MHz, CDCl<sub>3</sub>) δ 165.77, 152.02, 148.95, 148.79, 138.50, 123.89, 116.54, 63.66, 59.52, 29.52; HRMS (ESI-TOF) *m/z* Calcd for C<sub>12</sub>H<sub>16</sub>N<sub>3</sub>O<sub>2</sub> (M+H)<sup>+</sup>: 234.1237, found: 234.1233.

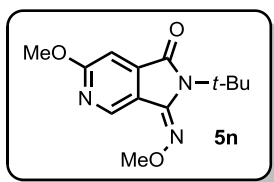

**(E)-2-(tert-butyl)-6-methoxy-3-(methoxyimino)-2,3-dihydro-1H-pyrrolo[3,4-c]pyridin-1-one (5n)**

5 mol % of Pd<sub>2</sub>(dba)<sub>3</sub> was used at 80 °C for 6 h. <sup>1</sup>H NMR (400 MHz, CDCl<sub>3</sub>) δ 9.03 (s, 1H), 7.05 (s, 1H), 4.07 (s, 3H), 4.01 (s, 3H), 1.74 (s, 9H); <sup>13</sup>C NMR (100 MHz, CDCl<sub>3</sub>) δ 165.57, 165.48, 149.03, 146.95, 141.95, 117.77, 104.18, 63.34, 59.45, 54.56, 29.53; HRMS (ESI-TOF) *m/z* Calcd for C<sub>13</sub>H<sub>18</sub>N<sub>3</sub>O<sub>3</sub> (M+H)<sup>+</sup>: 264.1343, found: 264.1345.



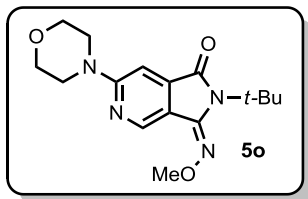

**(E)-2-(tert-butyl)-3-(methoxyimino)-6-morpholino-2,3-dihydro-1H-pyrrolo[3,4-c]pyridin-1-one (5o)**

5 mol % of Pd<sub>2</sub>(dba)<sub>3</sub> was used at 80 °C for 6 h. <sup>1</sup>H NMR (400 MHz, CDCl<sub>3</sub>) δ 8.99 (s, 1H), 6.90 (s, 1H), 4.04 (s, 3H), 3.82 (t, *J* = 4.0 Hz, 4H), 3.66 (t, *J* = 4.0 Hz, 4H), 1.74 (s, 9H); <sup>13</sup>C NMR (100 MHz, CDCl<sub>3</sub>) δ 166.40, 160.08, 149.65, 147.82, 140.96, 113.79, 98.66, 66.64, 63.15, 59.17, 45.39, 29.59; HRMS (ESI-TOF) *m/z* Calcd for C<sub>16</sub>H<sub>23</sub>N<sub>4</sub>O<sub>3</sub> (M+H)<sup>+</sup>: 319.1765, found: 319.1760.

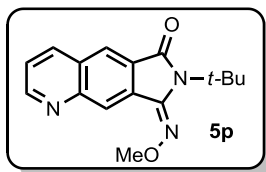

**(E)-7-(tert-butyl)-8-(methoxyimino)-7,8-dihydro-6H-pyrrolo[3,4-g]quinolin-6-one (5p)**

The reaction time was 2 h. <sup>1</sup>H NMR (400 MHz, CDCl<sub>3</sub>) δ 9.07 (s, 1H), 9.03 (dd, *J* = 4.0, 1.6 Hz, 1H), 8.32 (d, *J* = 7.6 Hz, 1H), 8.25 (s, 1H), 7.52 (dd, *J* = 8.4, 4.0 Hz, 1H), 4.14 (s, 3H), 1.81 (s, 9H); <sup>13</sup>C NMR (100 MHz, CDCl<sub>3</sub>) δ 166.69, 152.35, 150.62, 149.40, 137.61, 130.07, 129.42, 129.37, 127.54, 123.18, 122.65, 63.52, 59.40, 29.55; HRMS (ESI-TOF) *m/z* Calcd for C<sub>16</sub>H<sub>18</sub>N<sub>3</sub>O<sub>2</sub> (M+H)<sup>+</sup>: 284.1394, found: 284.1397.

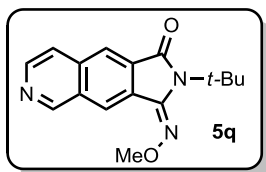

**(E)-2-(tert-butyl)-3-(methoxyimino)-2,3-dihydro-1H-pyrrolo[3,4-g]isoquinolin-1-one (5q)**

The reaction time was 2 h. <sup>1</sup>H NMR (400 MHz, CDCl<sub>3</sub>) δ 9.42 (s, 1H), 8.92 (s, 1H), 8.65 (d, *J* = 5.6 Hz, 1H), 8.24 (s, 1H), 7.81 (d, *J* = 6.0 Hz, 1H), 4.17 (s, 3H), 1.81 (s, 9H); <sup>13</sup>C NMR (100 MHz, CDCl<sub>3</sub>) δ 166.37, 154.16, 149.16, 144.92, 136.79, 133.49, 132.63, 130.64, 128.56, 125.46, 121.86, 63.66, 59.57, 29.54; HRMS (ESI-TOF) *m/z* Calcd for C<sub>16</sub>H<sub>18</sub>N<sub>3</sub>O<sub>2</sub> (M+H)<sup>+</sup>: 284.1394, found: 284.1396.

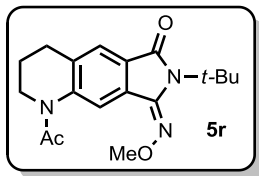

**(E)-1-acetyl-7-(tert-butyl)-8-(methoxyimino)-3,4,7,8-tetrahydro-1H-pyrrolo[3,4-g]quinolin-6(2H)-one (5r)**

The reaction time was 2 h.  $^1\text{H NMR}$  (400 MHz,  $\text{CDCl}_3$ )  $\delta$  8.18 (s, 1H), 7.54 (s, 1H), 4.05 (s, 3H), 3.80 (t,  $J = 6.8$  Hz, 2H), 2.80 (t,  $J = 6.8$  Hz, 2H), 2.28 (s, 3H), 1.98 (m, 2H), 1.74 (s, 9H);  $^{13}\text{C NMR}$  (100 MHz,  $\text{CDCl}_3$ )  $\delta$  170.30, 167.01, 149.72, 143.10, 128.27, 126.89, 123.98, 122.54, 63.44, 58.82, 43.85, 29.61, 27.71, 23.95, 23.63; **HRMS** (ESI-TOF)  $m/z$  Calcd for  $\text{C}_{18}\text{H}_{24}\text{N}_3\text{O}_3(\text{M}+\text{H})^+$ : 330.1812, found: 330.1814.

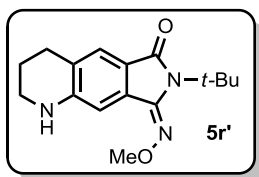

**(E)-7-(tert-butyl)-8-(methoxyimino)-3,4,7,8-tetrahydro-1H-pyrrolo[3,4-g]quinolin-6(2H)-one (5r')**

The reaction time was 4 h.  $^1\text{H NMR}$  (400 MHz,  $\text{CDCl}_3$ )  $\delta$  7.31 (s, 1H), 7.29 (s, 1H), 4.43 (brs, 1H), 3.99 (s, 3H), 3.35 (t,  $J = 4.6$  Hz, 2H), 2.79 (t,  $J = 6.2$  Hz, 2H), 1.94-1.88 (m, 2H), 1.71 (s, 9H);  $^{13}\text{C NMR}$  (100 MHz,  $\text{CDCl}_3$ )  $\delta$  168.23, 150.54, 148.98, 128.35, 123.75, 123.29, 119.63, 111.90, 62.89, 57.91, 41.75, 29.53, 27.41, 21.16; **HRMS** (ESI-TOF)  $m/z$  Calcd for  $\text{C}_{16}\text{H}_{22}\text{N}_3\text{O}_2(\text{M}+\text{H})^+$ : 288.1707, found: 288.1703.

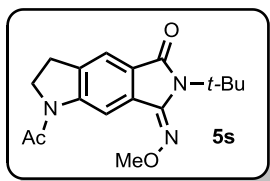

**(E)-1-acetyl-6-(tert-butyl)-7-(methoxyimino)-2,3,6,7-tetrahydropyrrolo[3,4-f]indol-5(1H)-one (5s)**

The reaction time was 2 h.  $^1\text{H NMR}$  (400 MHz,  $\text{CDCl}_3$ )  $\delta$  9.02 (s, 1H), 7.50 (s, 1H), 4.15 (t,  $J = 8.4$  Hz, 2H), 4.07 (s, 3H), 3.25 (t,  $J = 8.4$  Hz, 2H), 2.26 (s, 3H), 1.74 (s, 9H);  $^{13}\text{C NMR}$  (100 MHz,  $\text{CDCl}_3$ )  $\delta$  169.23, 167.15, 149.74, 147.03, 134.85, 128.86, 127.57, 118.82, 115.81, 63.44,

58.68, 49.42, 29.69, 27.88, 24.51; **HRMS** (ESI-TOF)  $m/z$  Calcd for  $C_{17}H_{22}N_3O_3(M+H)^+$ : 316.1656, found: 316.1664.

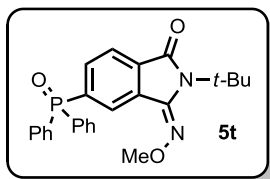

**(E)-2-(tert-butyl)-5-(diphenylphosphoryl)-3-(methoxyimino)isoindolin-1-one (5t)**

The reaction time was 2 h.  $^1\text{H NMR}$  (400 MHz,  $\text{CDCl}_3$ )  $\delta$  8.63 (d,  $J = 12.0$  Hz, 1H), 7.86-7.47 (m, 12H), 3.96 (s, 3H), 1.74 (s, 9H);  $^{13}\text{C NMR}$  (100 MHz,  $\text{CDCl}_3$ )  $\delta$  166.32, 149.11 (d,  $J = 1.7$  Hz), 138.04 (d,  $J = 99.9$  Hz), 134.75 (d,  $J = 10.9$  Hz, 6H), 134.47 (d,  $J = 2.5$  Hz), 132.40 (d,  $J = 2.8$  Hz), 132.15 (d,  $J = 9.9$  Hz), 131.80 (d,  $J = 104.6$  Hz), 131.55 (d,  $J = 11.6$  Hz), 128.76 (d,  $J = 12.3$  Hz), 128.38 (d,  $J = 14.5$  Hz), 122.72 (d,  $J = 12.6$  Hz), 63.44, 59.20, 29.55; **HRMS** (ESI-TOF)  $m/z$  Calcd for  $C_{25}H_{26}N_2O_3P (M+H)^+$ : 433.1676, found: 433.1677.

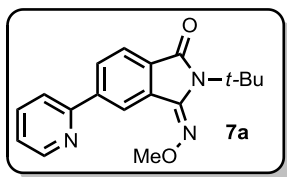

**(E)-2-(tert-butyl)-3-(methoxyimino)-5-(pyridin-2-yl)isoindolin-1-one (7a)**

The reaction time was 2 h.  $^1\text{H NMR}$  (400 MHz,  $\text{CDCl}_3$ )  $\delta$  8.83-8.82 (m, 1H), 8.73 (d,  $J = 4.8$  Hz, 1H), 8.22-8.17 (m, 1H), 7.86 (d,  $J = 8.0$  Hz, 1H), 7.82-7.76 (m, 2H), 7.31-7.28 (m, 1H), 4.11 (s, 3H), 1.78 (s, 9H);  $^{13}\text{C NMR}$  (100 MHz,  $\text{CDCl}_3$ )  $\delta$  167.18, 156.49, 149.98, 149.74, 144.23, 137.05, 131.91, 130.16, 129.14, 126.33, 123.09, 122.97, 121.32, 63.53, 58.90, 29.66; **HRMS** (ESI-TOF)  $m/z$  Calcd for  $C_{18}H_{20}N_3O_2 (M+H)^+$ : 310.1550, found: 310.1540.

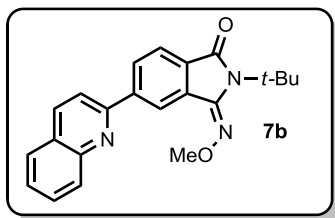

**(E)-2-(tert-butyl)-3-(methoxyimino)-5-(quinolin-2-yl)isoindolin-1-one (7b)**

The reaction time was 2 h.  $^1\text{H NMR}$  (400 MHz,  $\text{CDCl}_3$ )  $\delta$  8.97 (d,  $J = 0.8$  Hz, 1H), 8.40 (d,  $J = 8.0$  Hz, 1H), 8.26 (d,  $J = 8.8$  Hz, 1H), 8.20 (d,  $J = 8.6$  Hz, 1H), 7.91 (d,  $J = 4.4$  Hz, 1H), 7.89 (d,

$J = 5.2$  Hz, 1H), 7.85 (d,  $J = 8.0$  Hz, 1H), 7.76 (t,  $J = 7.6$  Hz, 1H), 7.56 (t,  $J = 7.6$  Hz, 1H), 4.13 (s, 3H), 1.79 (s, 9H);  $^{13}\text{C}$  NMR (100 MHz,  $\text{CDCl}_3$ )  $\delta$  167.21, 156.29, 149.82, 148.35, 144.47, 137.21, 132.20, 130.86, 130.08, 129.98, 129.21, 127.62, 127.50, 126.95, 126.92, 123.21, 119.27, 63.58, 58.99, 29.70; HRMS (ESI-TOF)  $m/z$  Calcd for  $\text{C}_{22}\text{H}_{22}\text{N}_3\text{O}_2(\text{M}+\text{H})^+$ : 360.1707, found: 360.1715.

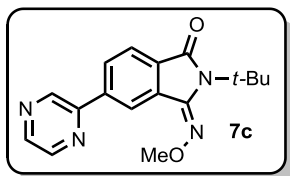

**(E)-2-(tert-butyl)-3-(methoxyimino)-5-(pyrazin-2-yl)isoindolin-1-one (7c)**

The reaction time was 2 h.  $^1\text{H}$  NMR (400 MHz,  $\text{CDCl}_3$ )  $\delta$  9.08 (d,  $J = 0.8$  Hz, 1H), 8.88 (s, 1H), 8.69 (d,  $J = 1.6$  Hz, 1H), 8.59 (d,  $J = 2.4$  Hz, 1H), 8.22 (dd,  $J = 8.0, 1.6$  Hz, 1H), 7.90 (d,  $J = 7.6$  Hz, 1H), 4.13 (s, 3H), 1.78 (s, 9H);  $^{13}\text{C}$  NMR (100 MHz,  $\text{CDCl}_3$ )  $\delta$  166.84, 151.96, 149.50, 144.46, 143.83, 142.68, 141.00, 132.70, 130.08, 129.29, 126.33, 123.42, 63.62, 59.07, 29.63; HRMS (ESI-TOF)  $m/z$  Calcd for  $\text{C}_{17}\text{H}_{19}\text{N}_4\text{O}_2(\text{M}+\text{H})^+$ : 311.1503, found: 311.1513.

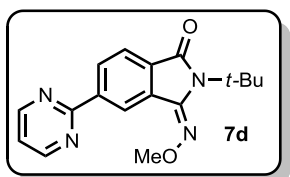

**(E)-2-(tert-butyl)-3-(methoxyimino)-5-(pyrimidin-2-yl)isoindolin-1-one (7d)**

The reaction time was 2 h.  $^1\text{H}$  NMR (400 MHz,  $\text{CDCl}_3$ )  $\delta$  9.27 (s, 1H), 8.85 (d,  $J = 4.8$  Hz, 2H), 8.66 (d,  $J = 8.0$  Hz, 1H), 7.87 (d,  $J = 8.0$  Hz, 1H), 7.25 (t,  $J = 4.8$  Hz, 1H), 4.14 (s, 3H), 1.78 (s, 9H);  $^{13}\text{C}$  NMR (100 MHz,  $\text{CDCl}_3$ )  $\delta$  167.06, 163.82, 157.44, 149.63, 142.20, 133.39, 131.23, 128.88, 127.60, 122.85, 119.82, 63.58, 58.95, 29.66; HRMS (ESI-TOF)  $m/z$  Calcd for  $\text{C}_{17}\text{H}_{19}\text{N}_4\text{O}_2(\text{M}+\text{H})^+$ : 311.1503, found: 311.1509.

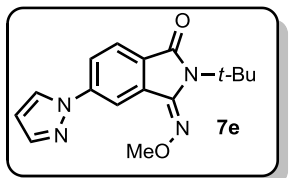

**(E)-2-(tert-butyl)-3-(methoxyimino)-5-(1H-pyrazol-1-yl)isoindolin-1-one (7e)**

The reaction time was 2 h.  $^1\text{H NMR}$  (400 MHz,  $\text{CDCl}_3$ )  $\delta$  8.58 (dd,  $J = 2.0, 0.4$  Hz, 1H), 8.00 (dd,  $J = 2.0, 0.4$  Hz, 1H), 7.91 (dd,  $J = 8.4, 2.0$  Hz, 1H), 7.83 (dd,  $J = 8.4, 0.4$  Hz, 1H), 7.77 (d,  $J = 1.6$ , 1H), 6.52 (dd,  $J = 2.8, 2.0$  Hz, 1H), 4.10 (s, 3H), 1.76 (s, 9H);  $^{13}\text{C NMR}$  (100 MHz,  $\text{CDCl}_3$ )  $\delta$  166.60, 149.20, 143.67, 142.00, 129.74, 129.31, 127.26, 123.96, 121.81, 118.09, 108.55, 63.58, 58.95, 29.57; **HRMS** (ESI-TOF)  $m/z$  Calcd for  $\text{C}_{16}\text{H}_{19}\text{N}_4\text{O}_2$  ( $\text{M}+\text{H}$ ) $^+$ : 299.1503, found: 299.1507.

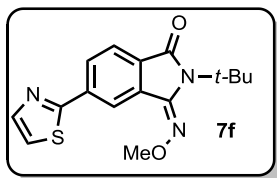

**(E)-2-(tert-butyl)-3-(methoxyimino)-5-(thiazol-2-yl)isoindolin-1-one (7f)**

The reaction time was 2 h.  $^1\text{H NMR}$  (400 MHz,  $\text{CDCl}_3$ )  $\delta$  8.84 (s, 1H), 8.15 (dd,  $J = 8.0, 1.6$  Hz, 1H), 7.94 (d,  $J = 3.2$  Hz, 1H), 7.83 (d,  $J = 8.0$  Hz, 1H), 7.42 (d,  $J = 3.2$  Hz, 1H), 4.12 (s, 3H), 1.77 (s, 9H);  $^{13}\text{C NMR}$  (100 MHz,  $\text{CDCl}_3$ )  $\delta$  167.16, 166.79, 149.38, 144.33, 137.92, 132.67, 129.54, 129.29, 125.88, 123.43, 120.14, 63.67, 59.10, 29.65; **HRMS** (ESI-TOF)  $m/z$  Calcd for  $\text{C}_{16}\text{H}_{18}\text{N}_3\text{O}_2\text{S}$  ( $\text{M}+\text{H}$ ) $^+$ : 316.1114, found: 316.1122.

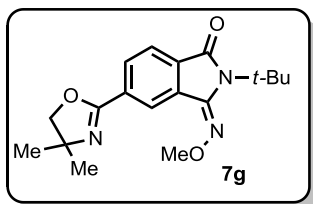

**(E)-2-(tert-butyl)-5-(4,4-dimethyl-4,5-dihydrooxazol-2-yl)-3-(methoxyimino)isoindolin-1-one (7g)**

The reaction time was 2 h.  $^1\text{H NMR}$  (400 MHz,  $\text{CDCl}_3$ )  $\delta$  8.74-8.73 (m, 1H), 8.16 (dd,  $J = 7.6, 1.2$  Hz, 1H), 7.79 (dd,  $J = 8.0, 0.8$  Hz, 1H), 4.15 (s, 2H), 4.10 (s, 3H), 1.76 (s, 9H), 1.41 (s, 6H);  $^{13}\text{C NMR}$  (100 MHz,  $\text{CDCl}_3$ )  $\delta$  166.74, 161.39, 149.30, 133.81, 132.61, 131.40, 128.47, 127.48, 122.67, 79.49, 68.11, 63.65, 59.10, 29.65, 28.51; **HRMS** (ESI-TOF)  $m/z$  Calcd for  $\text{C}_{18}\text{H}_{24}\text{N}_3\text{O}_3$  ( $\text{M}+\text{H}$ ) $^+$ : 330.1812, found: 330.1818.

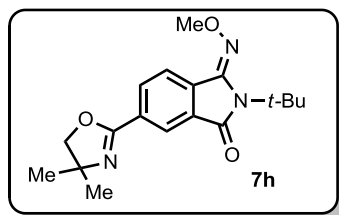

**(E)-2-(tert-butyl)-6-(4,4-dimethyl-4,5-dihydrooxazol-2-yl)-3-(methoxyimino)isoindolin-1-one (7h)**

The reaction time was 2 h.  $^1\text{H NMR}$  (400 MHz,  $\text{CDCl}_3$ )  $\delta$  8.29 (dd,  $J = 1.6, 0.8$  Hz, 1H), 8.26 (dd,  $J = 8.0, 0.8$  Hz, 1H), 8.19 (dd,  $J = 8.0, 1.6$  Hz, 1H), 4.15 (s, 2H), 4.09 (s, 3H), 1.75 (s, 9H), 1.40 (s, 6H);  $^{13}\text{C NMR}$  (100 MHz,  $\text{CDCl}_3$ )  $\delta$  166.58, 161.14, 149.57, 132.77, 132.00, 130.91, 130.34, 127.59, 122.67, 79.47, 68.06, 63.49, 58.96, 29.61, 28.47; **HRMS** (ESI-TOF)  $m/z$  Calcd for  $\text{C}_{18}\text{H}_{24}\text{N}_3\text{O}_3(\text{M}+\text{H})^+$ : 330.1812, found: 330.1820.

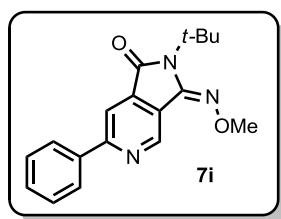

**(E)-2-(tert-butyl)-3-(methoxyimino)-6-phenyl-2,3-dihydro-1H-pyrrolo[3,4-c]pyridin-1-one (7i)**

The reaction time was 2 h.  $^1\text{H NMR}$  (400 MHz,  $\text{CDCl}_3$ )  $\delta$  9.52 (d,  $J = 1.2$  Hz, 1H), 8.10-8.09 (m, 3H), 7.53-7.47 (m, 3H), 4.13 (s, 3H), 1.78 (s, 9H);  $^{13}\text{C NMR}$  (100 MHz,  $\text{CDCl}_3$ )  $\delta$  166.00, 159.82, 149.17, 148.53, 139.77, 138.37, 130.13, 129.10, 127.42, 122.24, 112.99, 63.62, 59.55, 29.58; **HRMS** (ESI-TOF)  $m/z$  Calcd for  $\text{C}_{18}\text{H}_{20}\text{N}_3\text{O}_2(\text{M}+\text{H})^+$ : 310.1550, found: 310.1541.

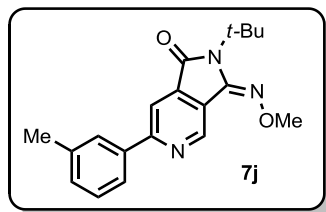

**(E)-2-(tert-butyl)-3-(methoxyimino)-6-(m-tolyl)-2,3-dihydro-1H-pyrrolo[3,4-c]pyridin-1-one (7j)**

The reaction time was 2 h.  $^1\text{H NMR}$  (400 MHz,  $\text{CDCl}_3$ )  $\delta$  9.51 (d,  $J = 1.2$  Hz, 1H), 8.07 (d,  $J = 1.2$  Hz, 1H), 7.92 (s, 1H), 7.86 (d,  $J = 8.0$  Hz, 1H), 7.39 (t,  $J = 8.0$  Hz, 1H), 7.28 (d,  $J = 7.6$  Hz,

1H), 4.13 (s, 3H), 2.45 (s, 3H), 1.78 (s, 9H);  $^{13}\text{C}$  NMR (100 MHz,  $\text{CDCl}_3$ )  $\delta$  166.00, 159.97, 149.17, 148.43, 139.69, 138.80, 138.29, 130.89, 128.99, 128.10, 124.51, 122.13, 113.02, 63.59, 59.51, 29.56, 21.65; HRMS (ESI-TOF)  $m/z$  Calcd for  $\text{C}_{19}\text{H}_{22}\text{N}_3\text{O}_2(\text{M}+\text{H})^+$ : 324.1707, found: 324.1703.

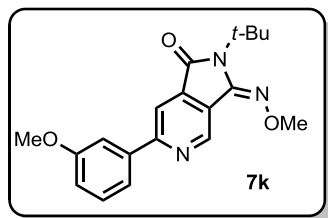

**(E)-2-(tert-butyl)-3-(methoxyimino)-6-(3-methoxyphenyl)-2,3-dihydro-1H-pyrrolo[3,4-c]pyridin-1-one (7k)**

The reaction time was 10 h.  $^1\text{H}$  NMR (400 MHz,  $\text{CDCl}_3$ )  $\delta$  9.51 (d,  $J = 1.2$  Hz, 1H), 8.08 (d,  $J = 1.2$  Hz, 1H), 7.68-7.63 (m, 2H), 7.41 (t,  $J = 8.0$  Hz, 1H), 7.02 (ddd,  $J = 8.0, 2.4, 0.8$  Hz, 1H), 4.13 (s, 3H), 3.90 (s, 3H), 1.78 (s, 9H);  $^{13}\text{C}$  NMR (100 MHz,  $\text{CDCl}_3$ )  $\delta$  165.97, 160.29, 159.54, 149.14, 148.43, 139.75, 139.72, 130.09, 122.32, 119.78, 116.41, 113.11, 112.28, 63.61, 59.55, 55.53, 29.57; HRMS (ESI-TOF)  $m/z$  Calcd for  $\text{C}_{19}\text{H}_{22}\text{N}_3\text{O}_3(\text{M}+\text{H})^+$ : 340.1656, found: 340.1663.

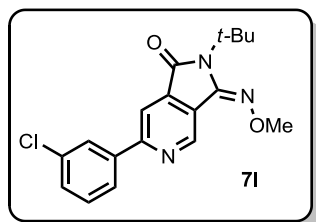

**(E)-2-(tert-butyl)-6-(3-chlorophenyl)-3-(methoxyimino)-2,3-dihydro-1H-pyrrolo[3,4-c]pyridin-1-one (7l)**

The reaction time was 10 h.  $^1\text{H}$  NMR (400 MHz,  $\text{CDCl}_3$ )  $\delta$  9.51 (d,  $J = 1.2$  Hz, 1H), 8.12 (dd,  $J = 2.4, 1.2$  Hz, 1H), 8.06 (d,  $J = 1.2$  Hz, 1H), 7.95-7.92 (m, 1H), 7.44-7.43 (m, 2H), 4.14 (s, 3H), 1.78 (s, 9H);  $^{13}\text{C}$  NMR (100 MHz,  $\text{CDCl}_3$ )  $\delta$  165.74, 158.20, 148.98, 148.60, 140.08, 139.90, 135.29, 130.31, 130.07, 127.65, 125.38, 122.71, 113.09, 63.70, 59.65, 29.57; HRMS (ESI-TOF)  $m/z$  Calcd for  $\text{C}_{18}\text{H}_{19}\text{ClN}_3\text{O}_2(\text{M}+\text{H})^+$ : 344.1160, found: 344.1165.

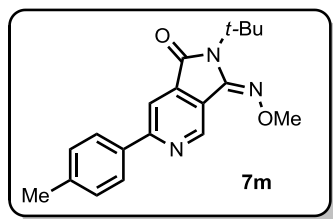

**(E)-2-(tert-butyl)-3-(methoxyimino)-6-(p-tolyl)-2,3-dihydro-1H-pyrrolo[3,4-c]pyridin-1-one (7m)**

The reaction time was 2 h.  $^1\text{H NMR}$  (400 MHz,  $\text{CDCl}_3$ )  $\delta$  9.48 (d,  $J = 1.2$  Hz, 1H), 8.05 (d,  $J = 1.2$  Hz, 1H), 7.98 (d,  $J = 8.0$  Hz, 2H), 7.30 (d,  $J = 8.0$  Hz, 2H), 4.11 (s, 3H), 2.41 (s, 3H), 1.77 (s, 9H);  $^{13}\text{C NMR}$  (100 MHz,  $\text{CDCl}_3$ )  $\delta$  166.02, 159.75, 149.18, 148.40, 140.33, 139.63, 135.54, 129.78, 127.25, 121.86, 112.54, 63.53, 59.44, 29.54, 21.45; **HRMS** (ESI-TOF)  $m/z$  Calcd for  $\text{C}_{19}\text{H}_{22}\text{N}_3\text{O}_2(\text{M}+\text{H})^+$ : 324.1707, found: 324.1712.

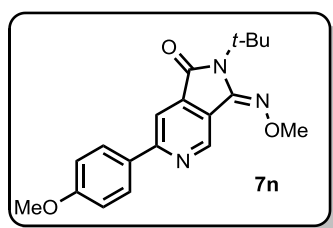

**(E)-2-(tert-butyl)-3-(methoxyimino)-6-(4-methoxyphenyl)-2,3-dihydro-1H-pyrrolo[3,4-c]pyridin-1-one (7n)**

The reaction time was 2 h.  $^1\text{H NMR}$  (400 MHz,  $\text{CDCl}_3$ )  $\delta$  9.46 (d,  $J = 1.2$  Hz, 1H), 8.06 (d,  $J = 8.8$  Hz, 2H), 8.01 (d,  $J = 1.2$  Hz, 1H), 7.02 (d,  $J = 9.2$  Hz, 2H), 4.12 (s, 3H), 3.88 (s, 3H), 1.77 (s, 9H);  $^{13}\text{C NMR}$  (100 MHz,  $\text{CDCl}_3$ )  $\delta$  166.13, 161.41, 159.43, 149.27, 148.42, 139.67, 130.97, 128.84, 121.47, 114.46, 112.05, 63.56, 59.48, 55.54, 29.58; **HRMS** (ESI-TOF)  $m/z$  Calcd for  $\text{C}_{19}\text{H}_{22}\text{N}_3\text{O}_3(\text{M}+\text{H})^+$ : 340.1656, found: 340.1663.

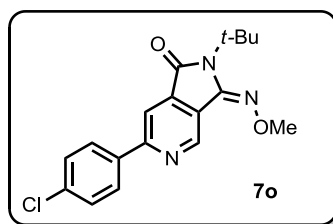

**(E)-2-(tert-butyl)-6-(4-chlorophenyl)-3-(methoxyimino)-2,3-dihydro-1H-pyrrolo[3,4-c]pyridin-1-one (7o)**



The reaction time was 2 h.  $^1\text{H NMR}$  (400 MHz,  $\text{CDCl}_3$ )  $\delta$  9.49 (s, 1H), 8.04 (s, 1H), 8.03 (d,  $J = 8.4$  Hz, 2H), 7.47 (d,  $J = 8.4$  Hz, 2H), 4.13 (s, 3H), 1.77 (s, 9H);  $^{13}\text{C NMR}$  (100 MHz,  $\text{CDCl}_3$ )  $\delta$  165.59, 158.23, 148.81, 148.35, 139.63, 136.52, 136.16, 129.08, 128.43, 122.18, 112.52, 63.45, 59.39, 29.35; **HRMS** (ESI-TOF)  $m/z$ . Calcd for  $\text{C}_{18}\text{H}_{19}\text{ClN}_3\text{O}_2(\text{M}+\text{H})^+$ : 344.1160, found: 344.1167.

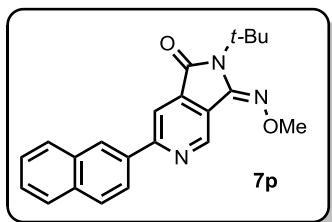

**(E)-2-(tert-butyl)-3-(methoxyimino)-6-(naphthalen-2-yl)-2,3-dihydro-1H-pyrrolo[3,4-c]pyridin-1-one (7p)**

The reaction time was 10 h.  $^1\text{H NMR}$  (400 MHz,  $\text{CDCl}_3$ )  $\delta$  9.56 (d,  $J = 1.2$  Hz, 1H), 8.59 (d,  $J = 1.2$  Hz, 1H), 8.23-8.20 (m, 2H), 7.98-7.96 (m, 2H), 7.89-7.87 (m, 1H), 7.55-7.52 (m, 2H), 4.14 (s, 3H), 1.79 (s, 9H);  $^{13}\text{C NMR}$  (100 MHz,  $\text{CDCl}_3$ )  $\delta$  166.01, 159.69, 149.19, 148.61, 139.81, 135.61, 134.21, 133.51, 129.11, 128.88, 127.83, 127.41, 127.27, 126.70, 124.51, 122.21, 113.22, 63.66, 59.58, 29.60; **HRMS** (ESI-TOF)  $m/z$ . Calcd for  $\text{C}_{22}\text{H}_{22}\text{N}_3\text{O}_2(\text{M}+\text{H})^+$ : 360.1707, found: 360.1718.

## 4. References

- (S1) Wrigglesworth, J. W., Cox, B., Lloyd-Jones, G. C. & Booker-Milburn, K. I. New Heteroannulation Reactions of N-Alkoxybenzamides by Pd(II) Catalyzed C–H Activation. *Org. Lett.* **13**, 5326–5329 (2011).
- (S2) Guimond, N., Gouliaras, C. & Fagnou, K. Rhodium(III)-Catalyzed Isoquinolone Synthesis: The N–O Bond as a Handle for C–N Bond Formation and Catalyst Turnover. *J. Am. Chem. Soc.* **132**, 6908-6909 (2010).
- (S3) Rakshit, S., Grohmann, C., Besset, T. & Glorius, F. Rh(III)-Catalyzed Directed C–H Olefination Using an Oxidizing Directing Group: Mild, Efficient, and Versatile. *J. Am. Chem. Soc.* **133**, 2350-2353 (2011).
- (S4) Zhong, H. B., Yang, D., Wang, S. Q. & Hang, J. H. Pd-catalyzed synthesis of isoquinolinones and analogues *via* C–H and N–H bonds double activation. *Chem. Commun.* **48**, 3236-3238 (2012).
- (S5) Li, B. *et al.* Ruthenium-Catalyzed Oxidative C–H bonds Olefination of N-Methoxybenzamide Using an Oxidizing Directing Group. *Org. Lett.* **14**, 736-739 (2012).
- (S6) Kukosha, T., Trufilkina, N., Belyakov, S. & Katkevics, M. Copper-Catalyzed Cross-Coupling of *O*-Alkyl Hydroxamates with Aryl Iodides. *Synthesis* **44**, 2413-2423 (2012).

- (S7) Li, C. L., Li, P. H., Yang, J. & Wang, L. Palladium-catalyzed deamidative arylation of azoles with arylamides through a tandem decarbonylation-C–H functionalization. *Chem. Commun.* **48**, 4214-4216 (2012).
- (S8) Zeng, R., Fu, C. L. & Ma, S. M. Highly Selective Mild Stepwise Allylation of N-Methoxybenzamides with Allenes. *J. Am. Chem. Soc.* **134**, 9597-9600 (2012).
- (S9) Grohmann, C., Wang, H. G. & Glorius, F. Rh[III]-Catalyzed C–H Amidation Using Aroylcarbamates To Give N-Boc Protected Arylamines. *Org. Lett.* **15**, 3014-3017 (2013).
- (S10) German, L. V., Simon, O. U., Alejandra, M. O., Rocio, G. M. & Luis, D. M. Convenient access to isoindolinones via carbamoyl radical cyclization. Synthesis of cichorine and 4-hydroxyisoindolin-1-one natural products. *Tetrahedron* **67**, 2693-2701 (2011).
- (S11) Clift, M. D. & Silverman, R. B. Synthesis and evaluation of novel aromatic substrates and competitive inhibitors of GABA aminotransferase. *Bioorg. Med. Chem. Lett.* **18**, 3122-3125 (2008).
- (S12) Kauffman, J. M. & Moyna, G. Diarylamino Groups as Photostable Auxofluors in 2-Benzoxazolylfluorene, 2,5-Diphenyloxazoles, 1,3,5-Hexatrienes, 1,4-Distyrylbenzenes, and 2,7-Distyrylfluorenes. *J. Org. Chem.* **68**, 839-853 (2003).
- (S13) Zhang, C. Y. *et al.* Tetrahydroquinoline derivatives as opioid receptor antagonists. *Bioorg. Med. Chem. Lett.* **21**, 670-676 (2011).

## 5. NMR Spectra for New Compounds

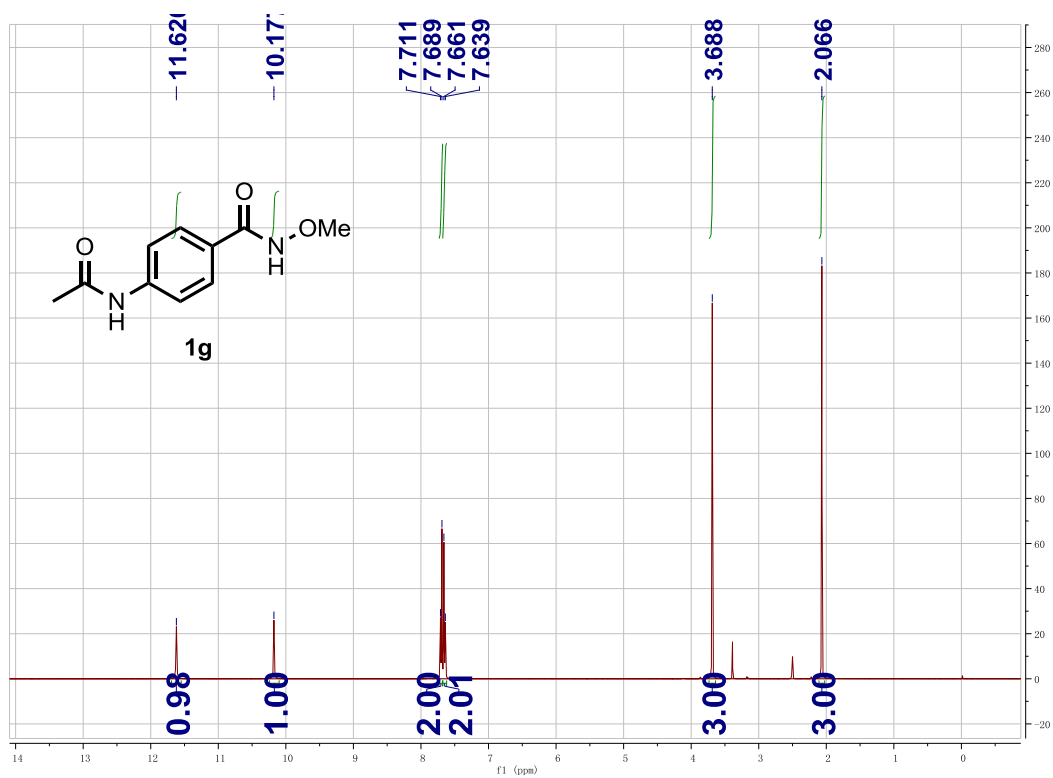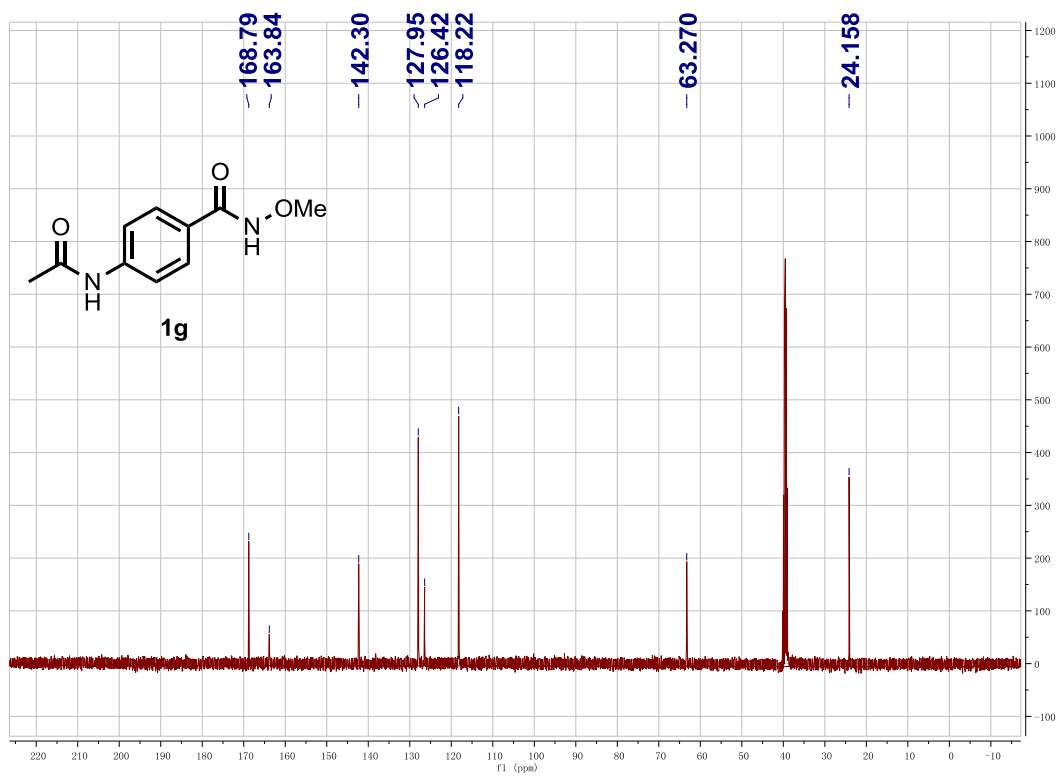

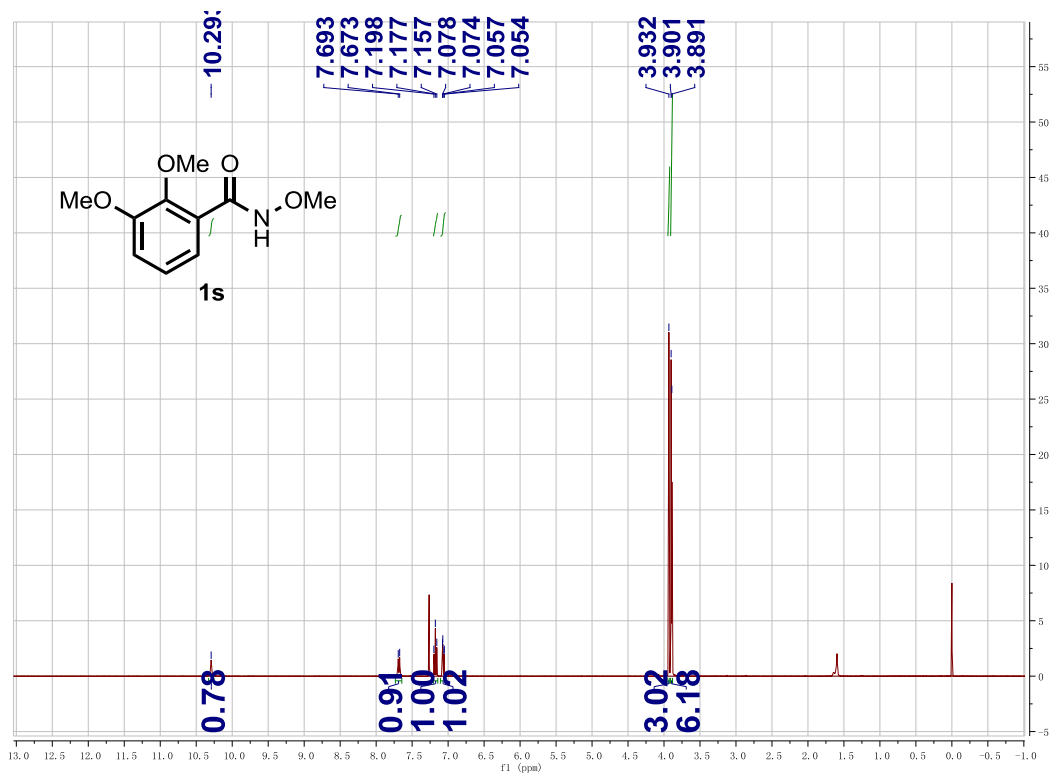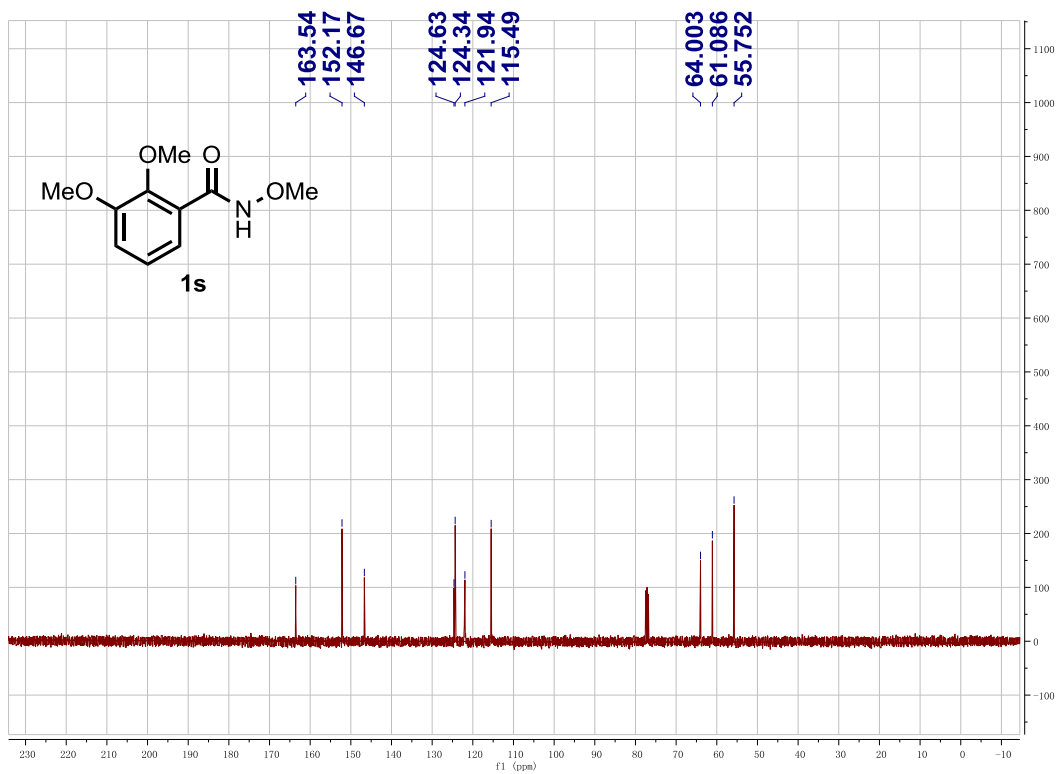

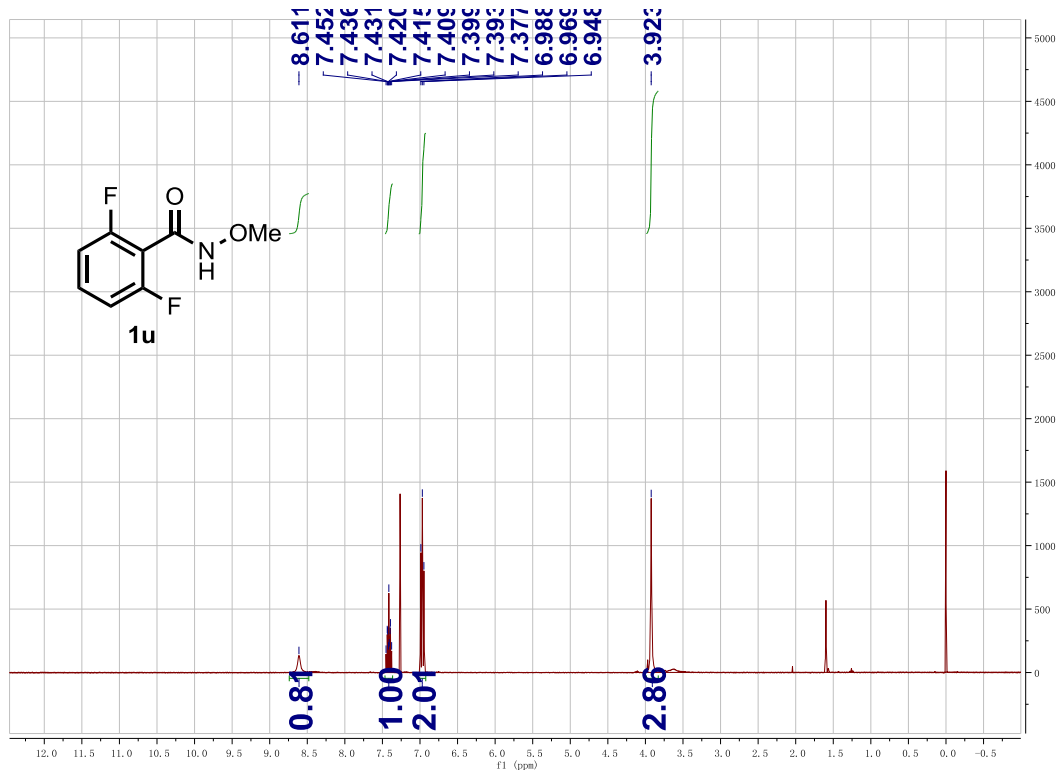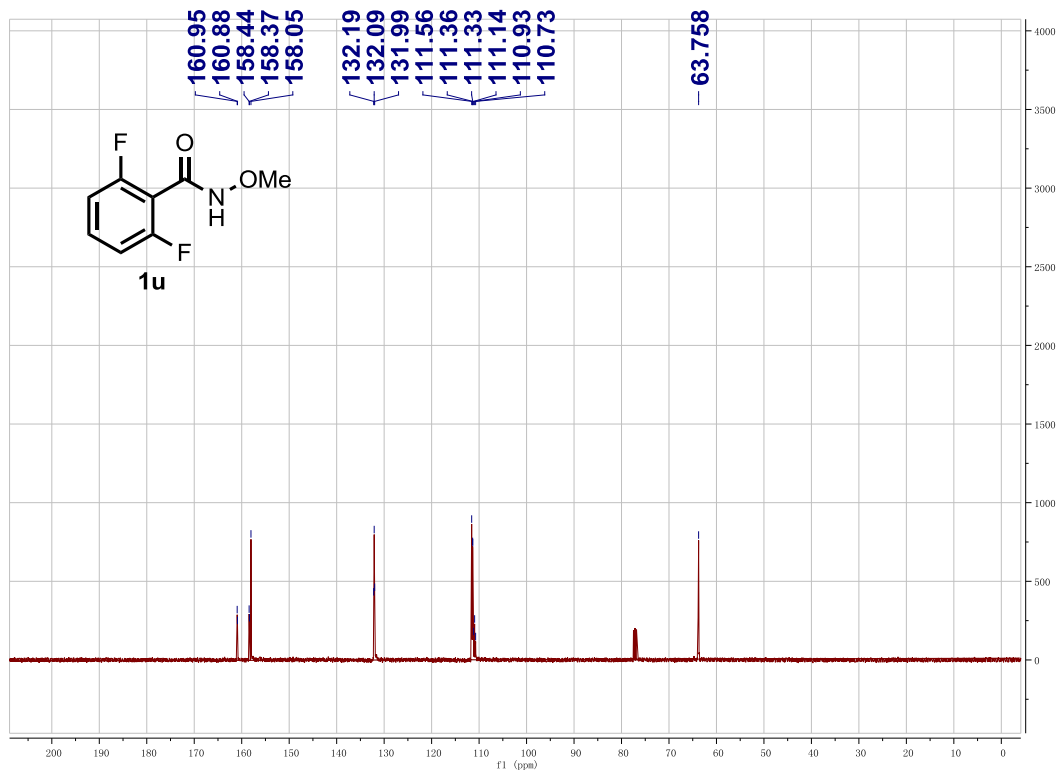

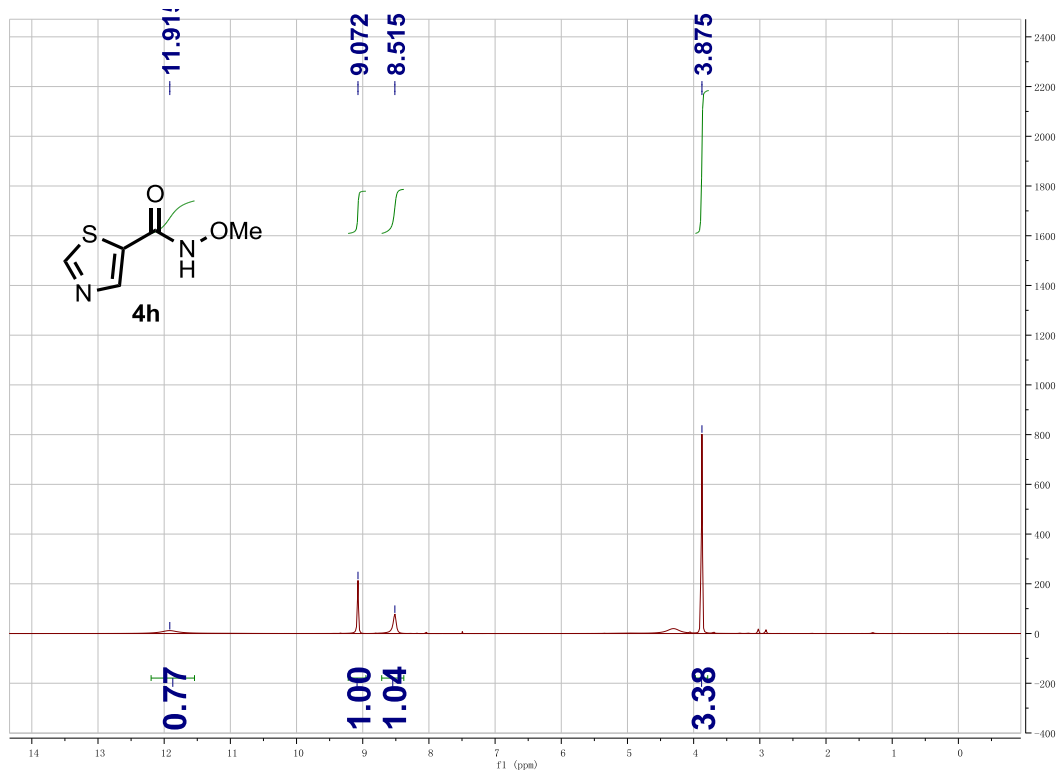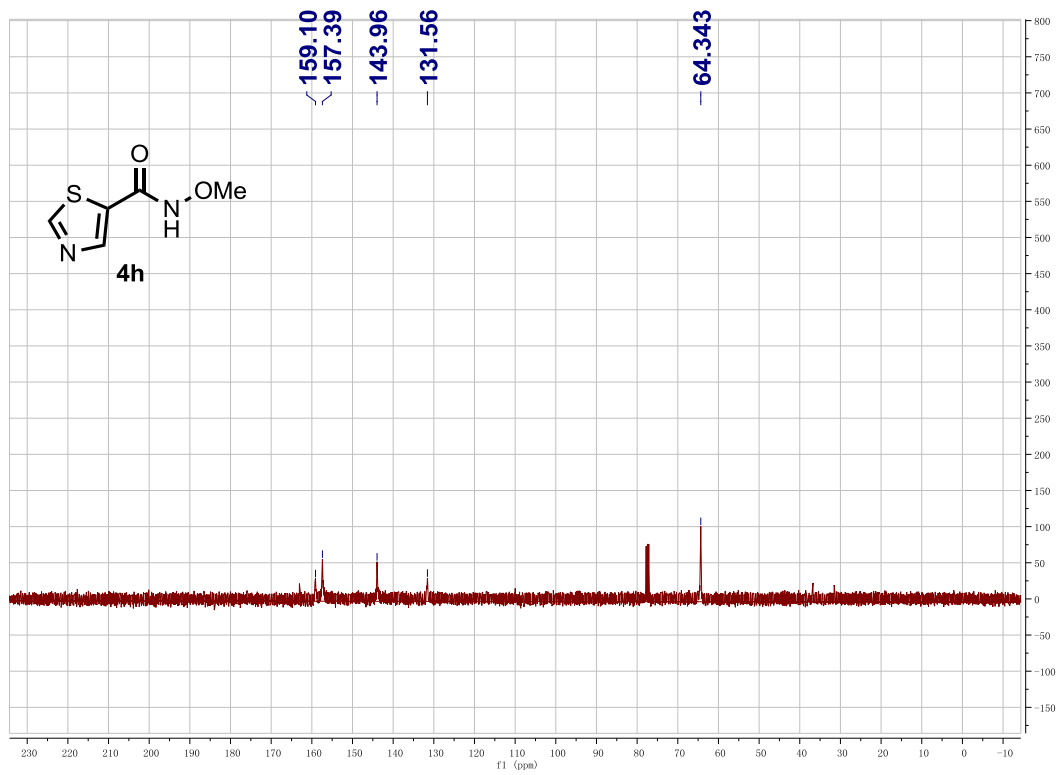

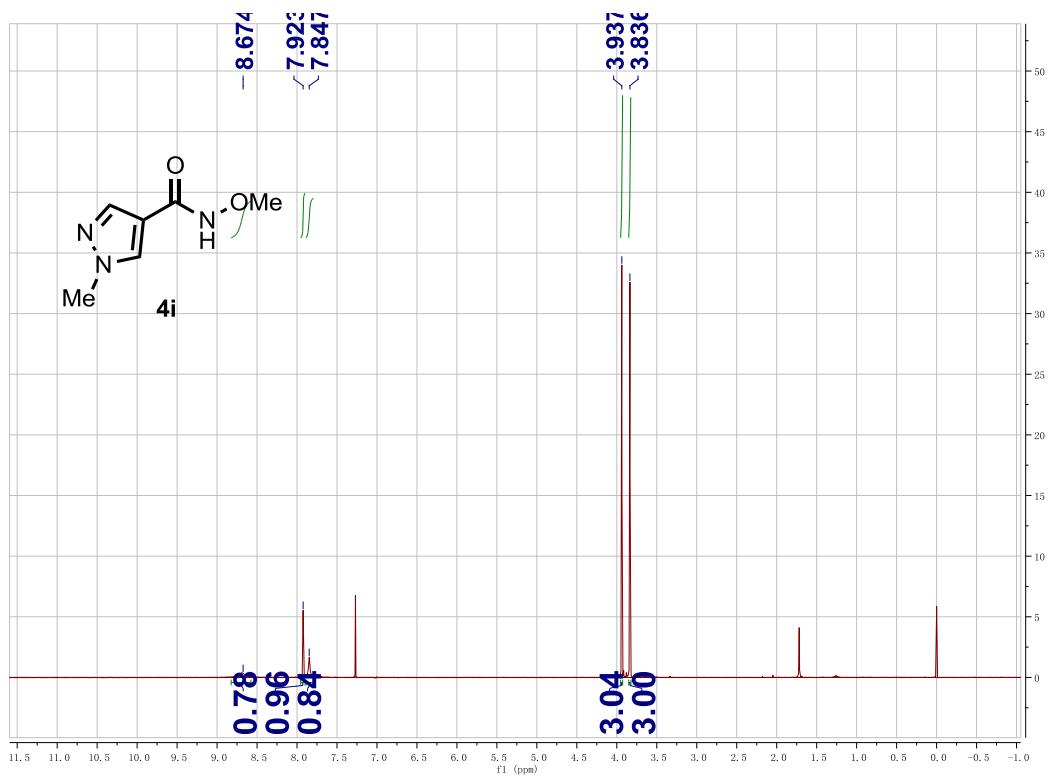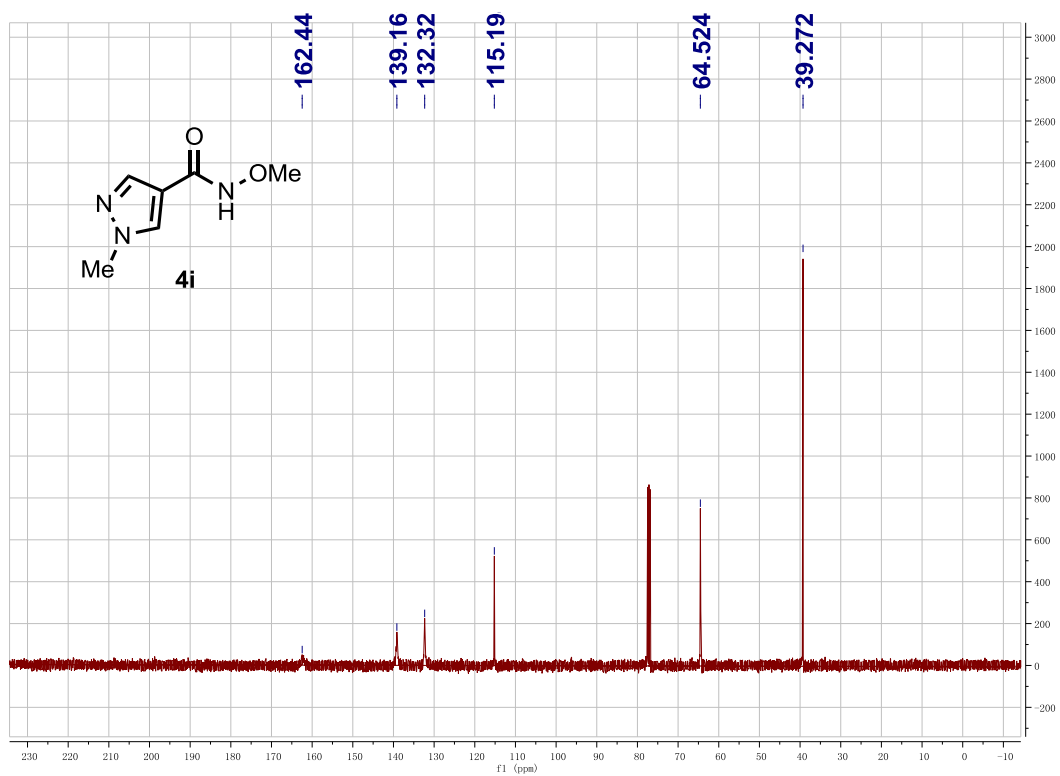



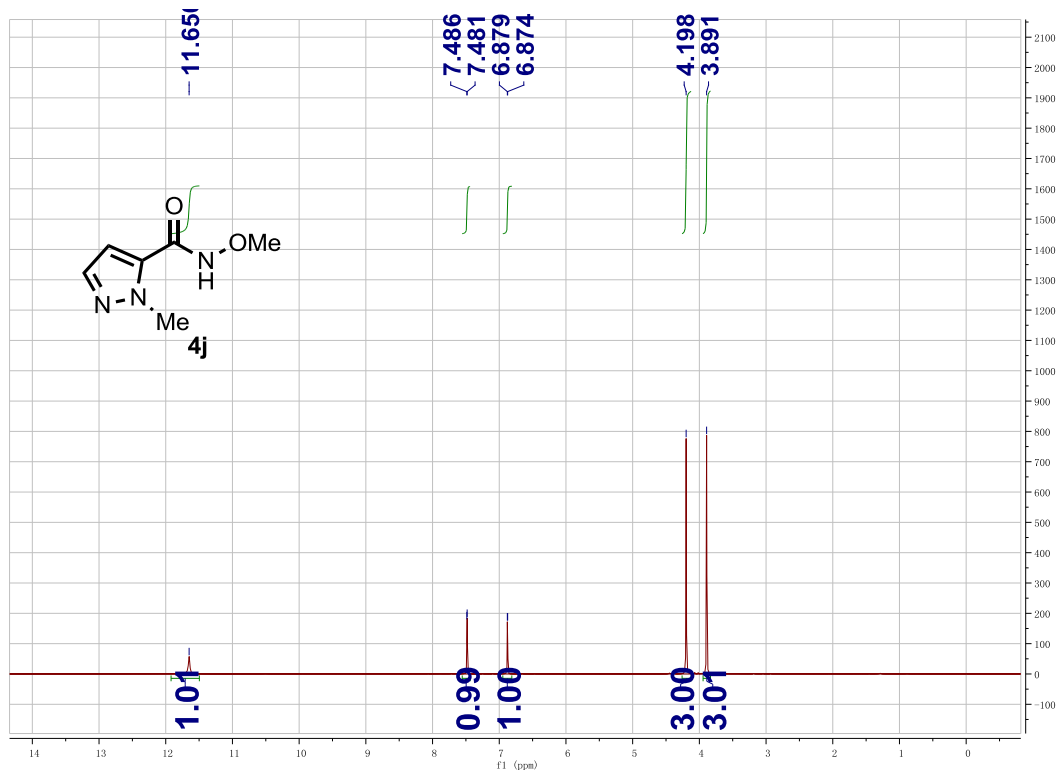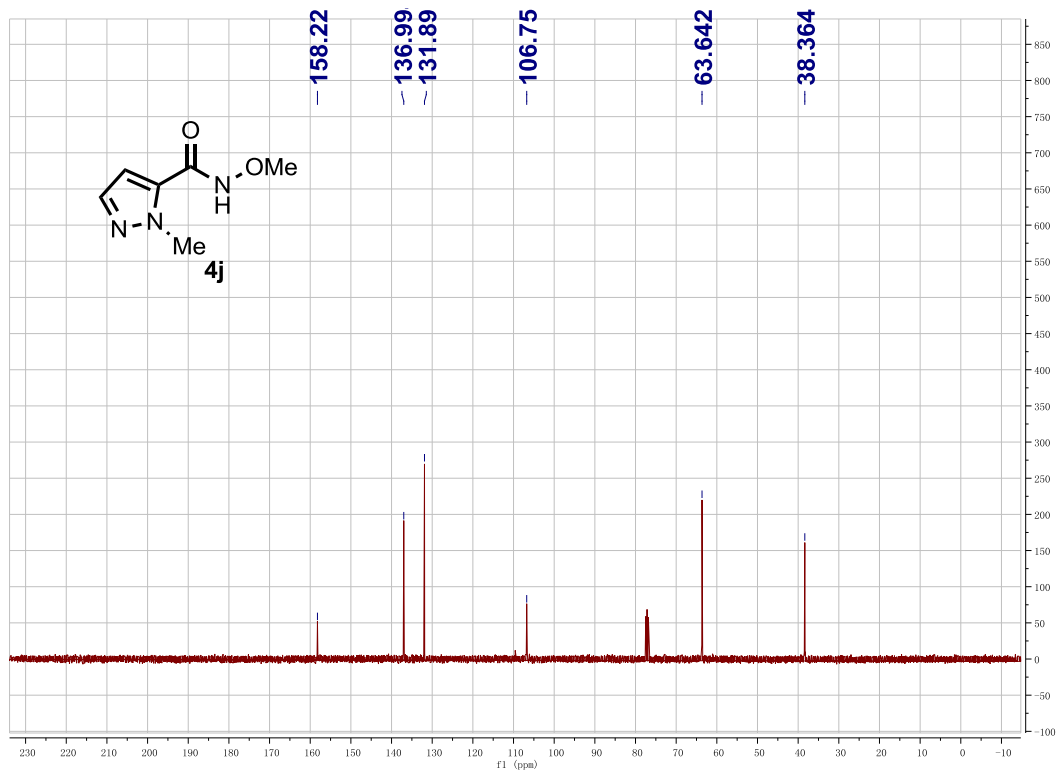

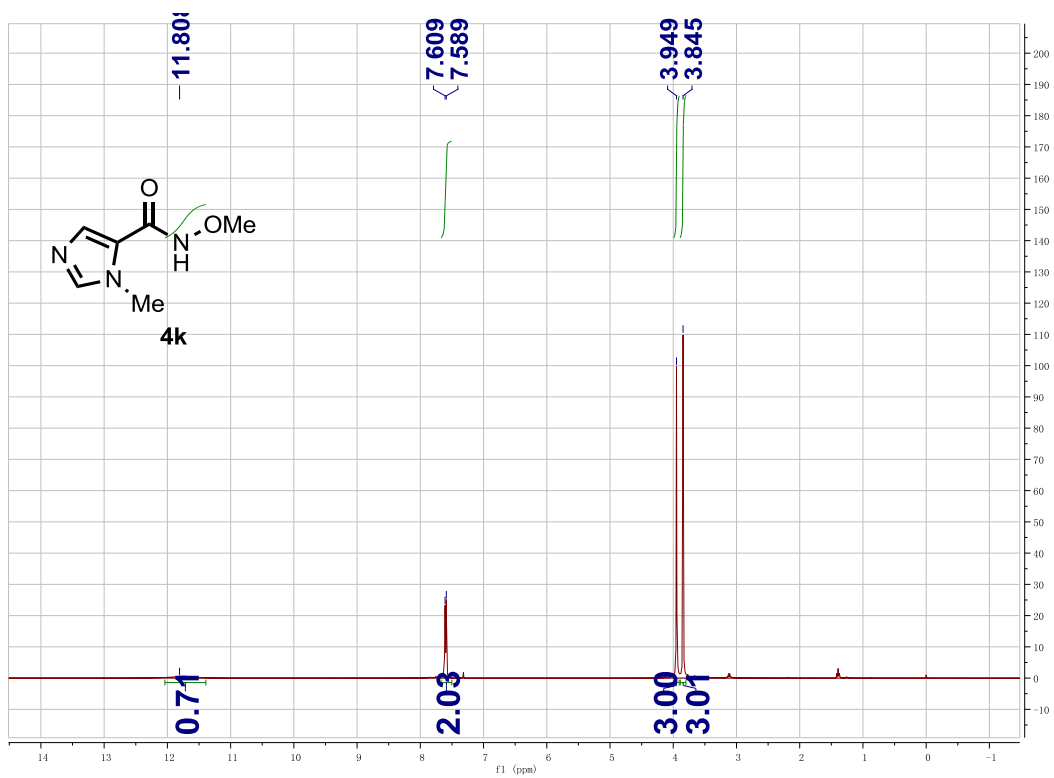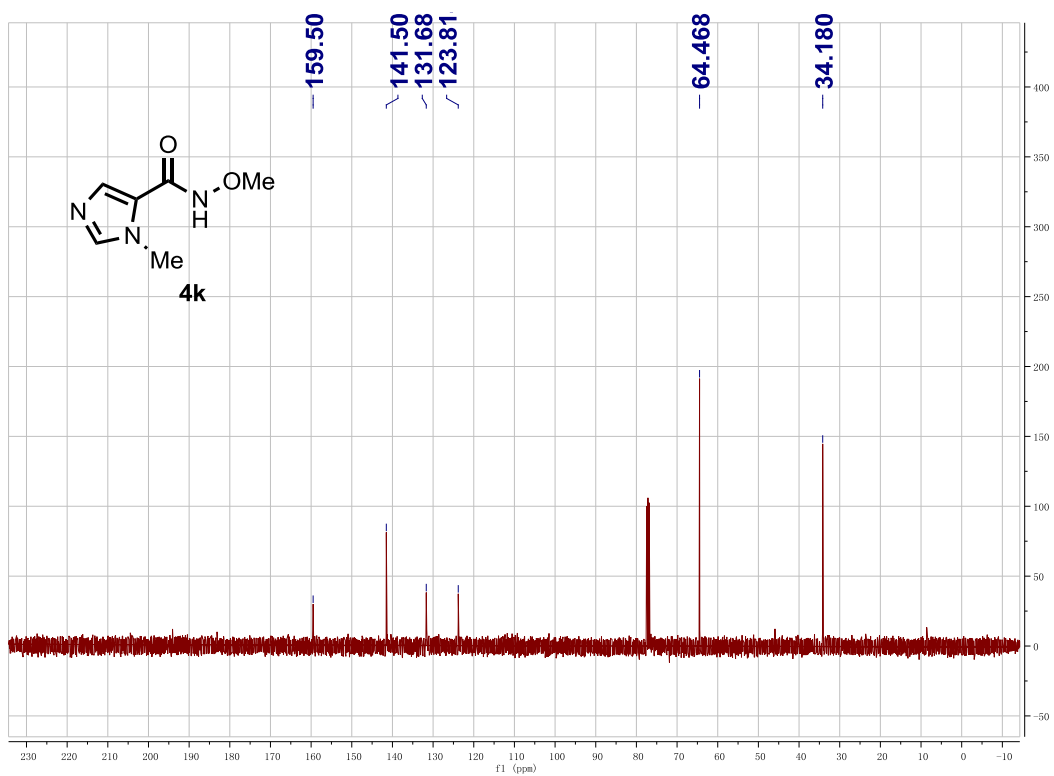

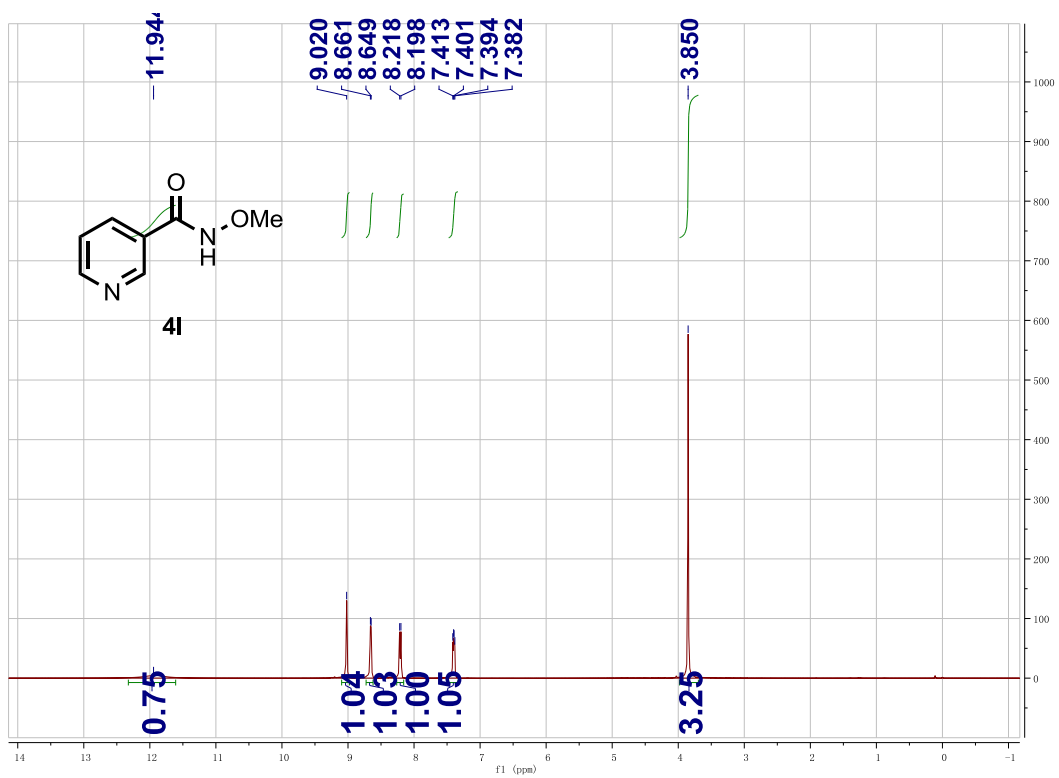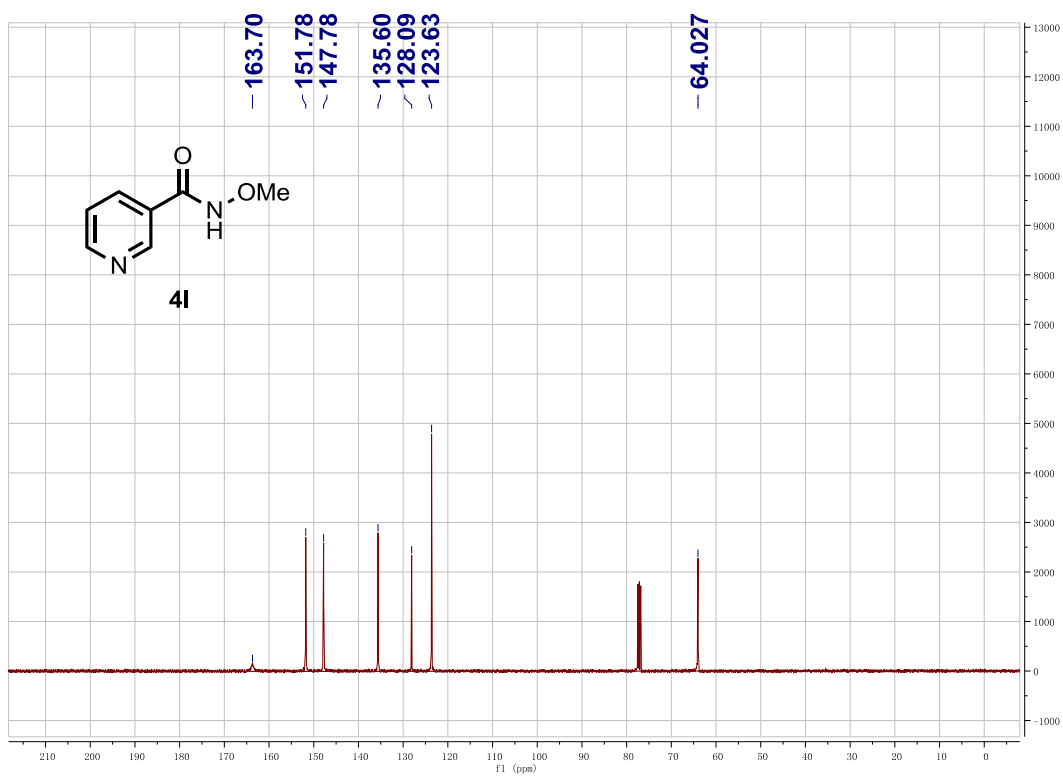

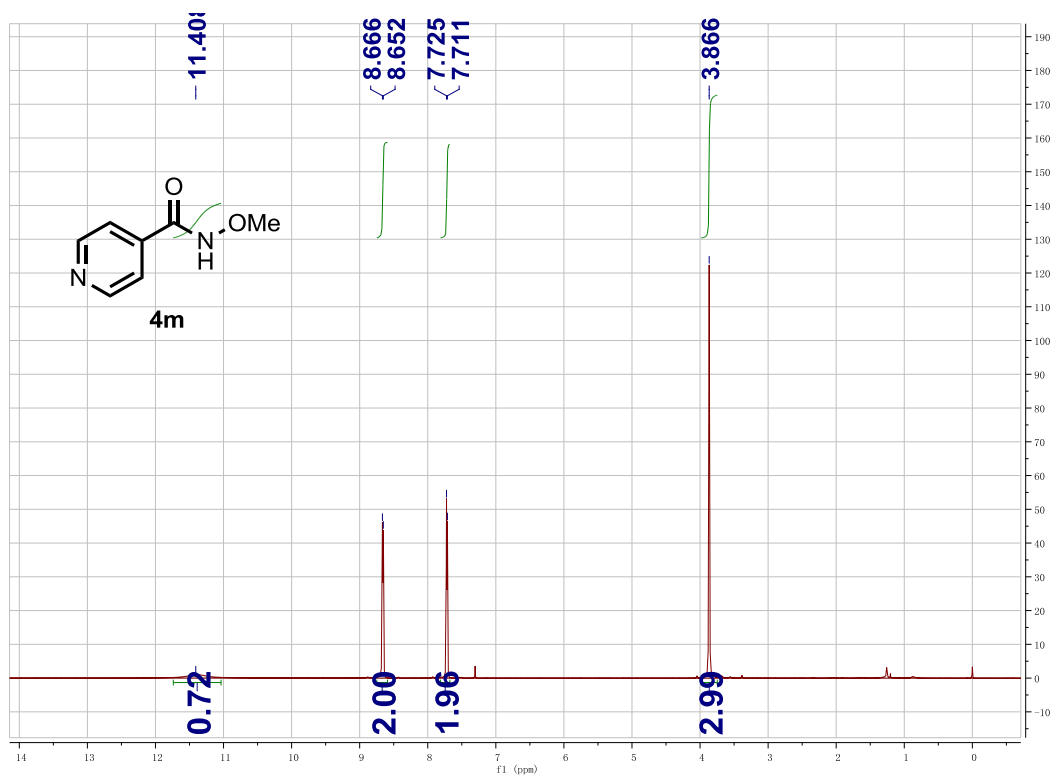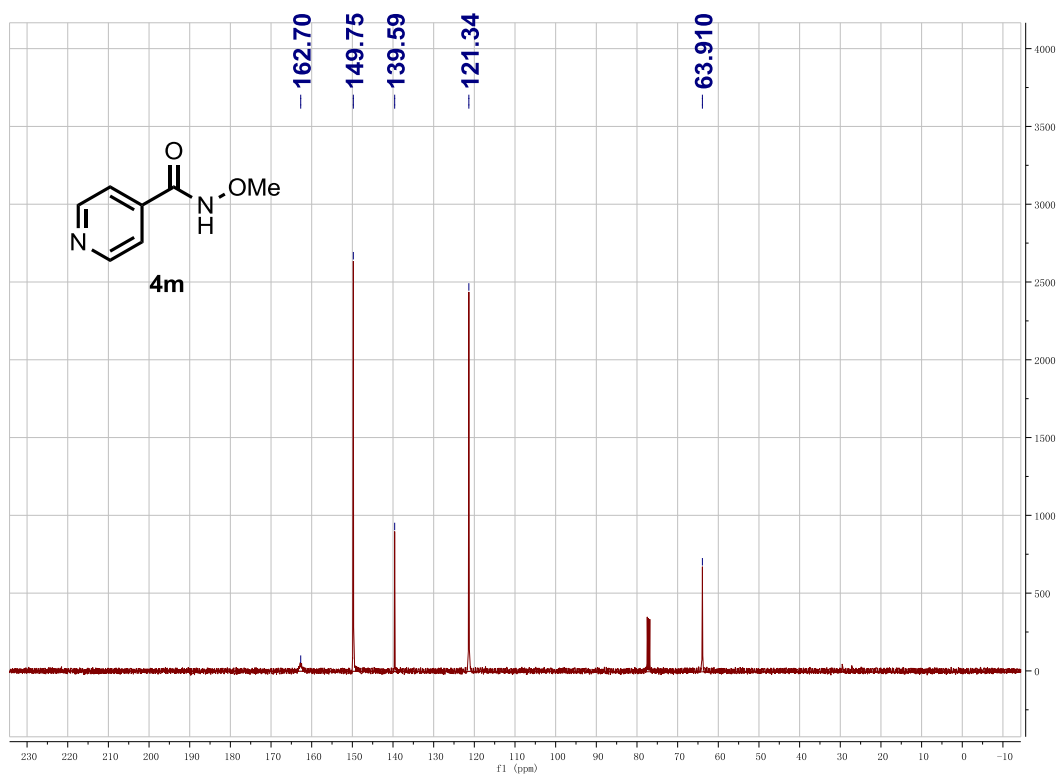

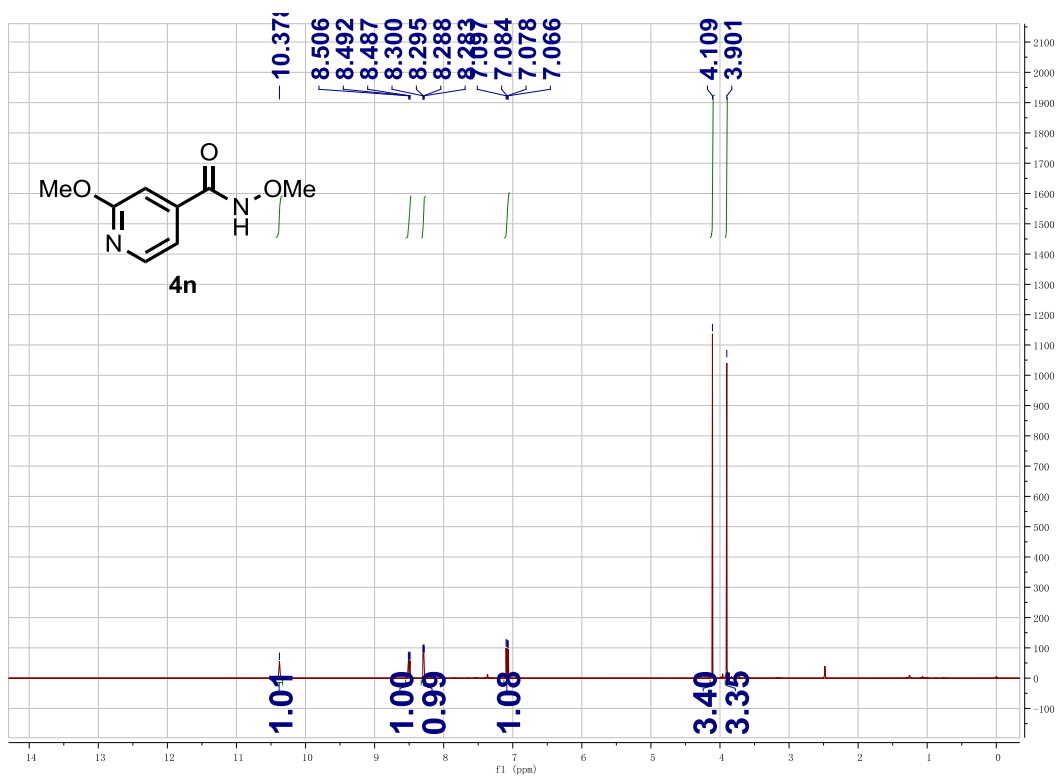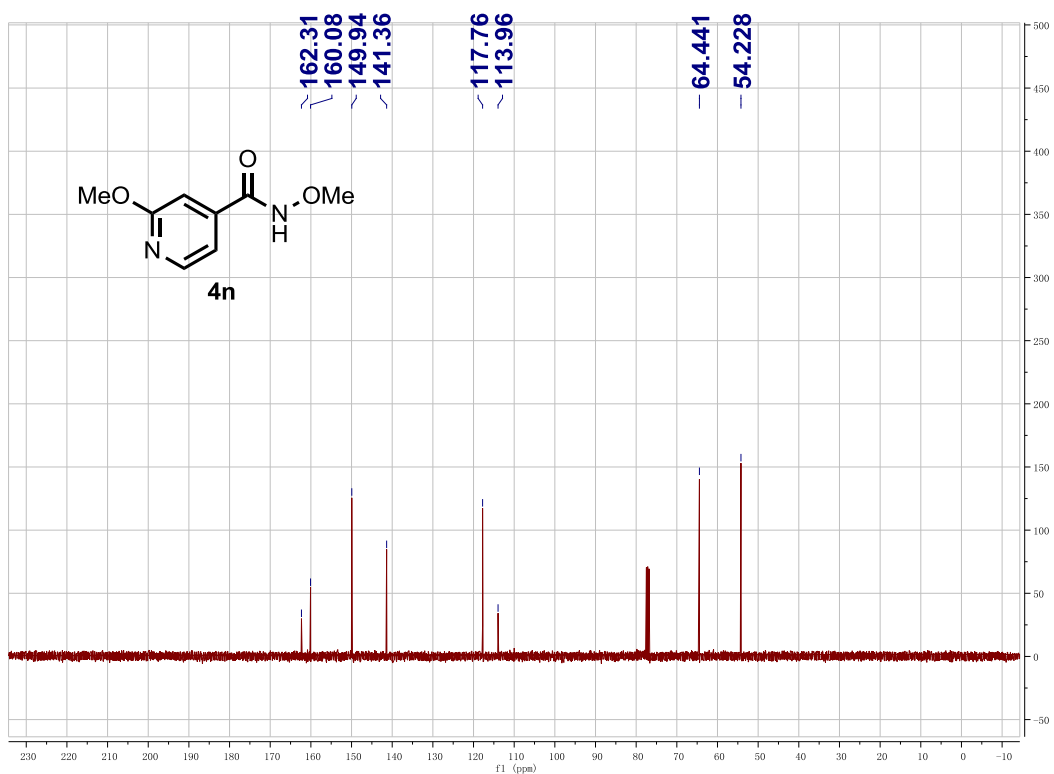

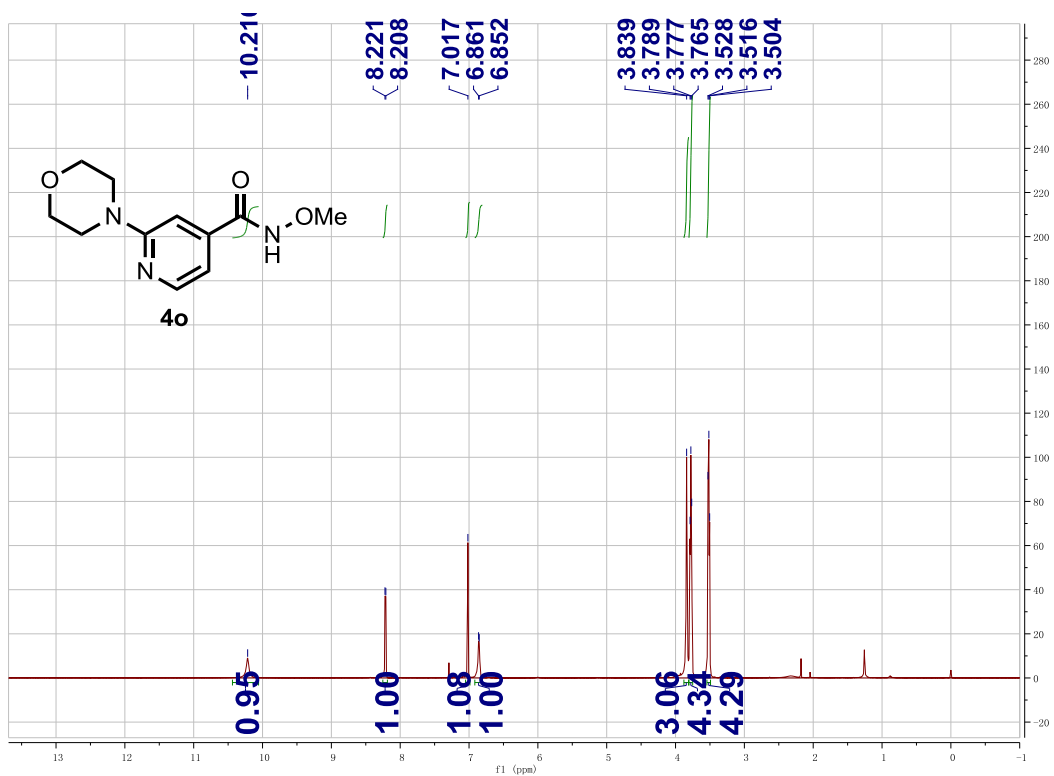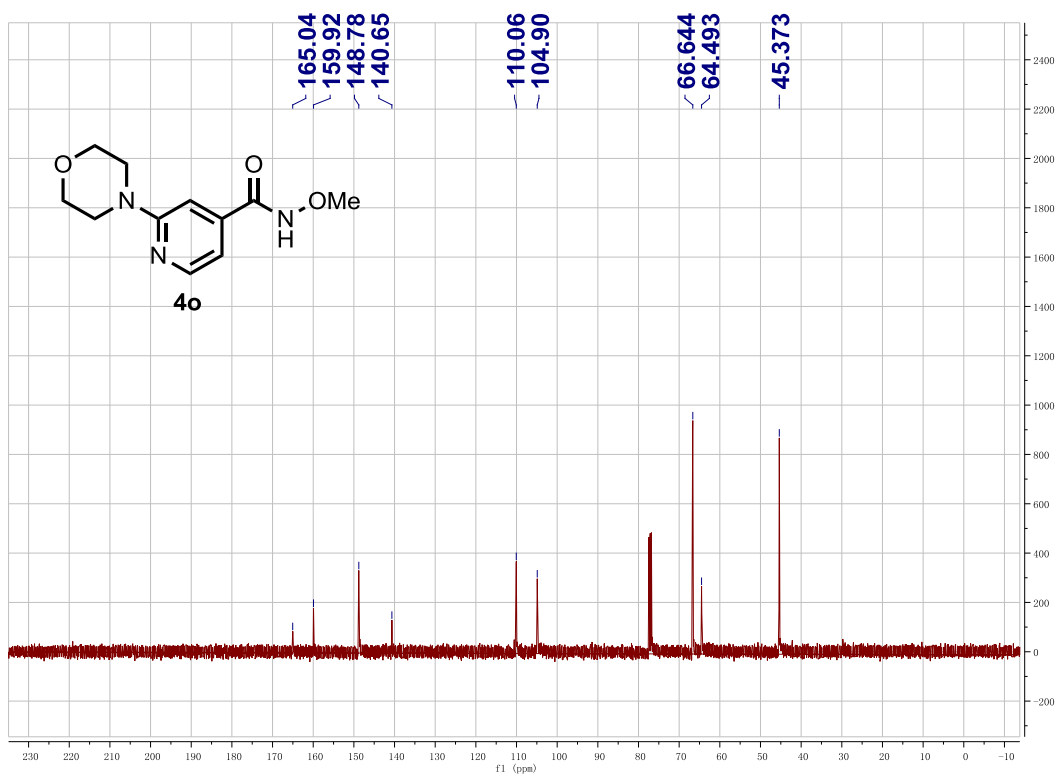

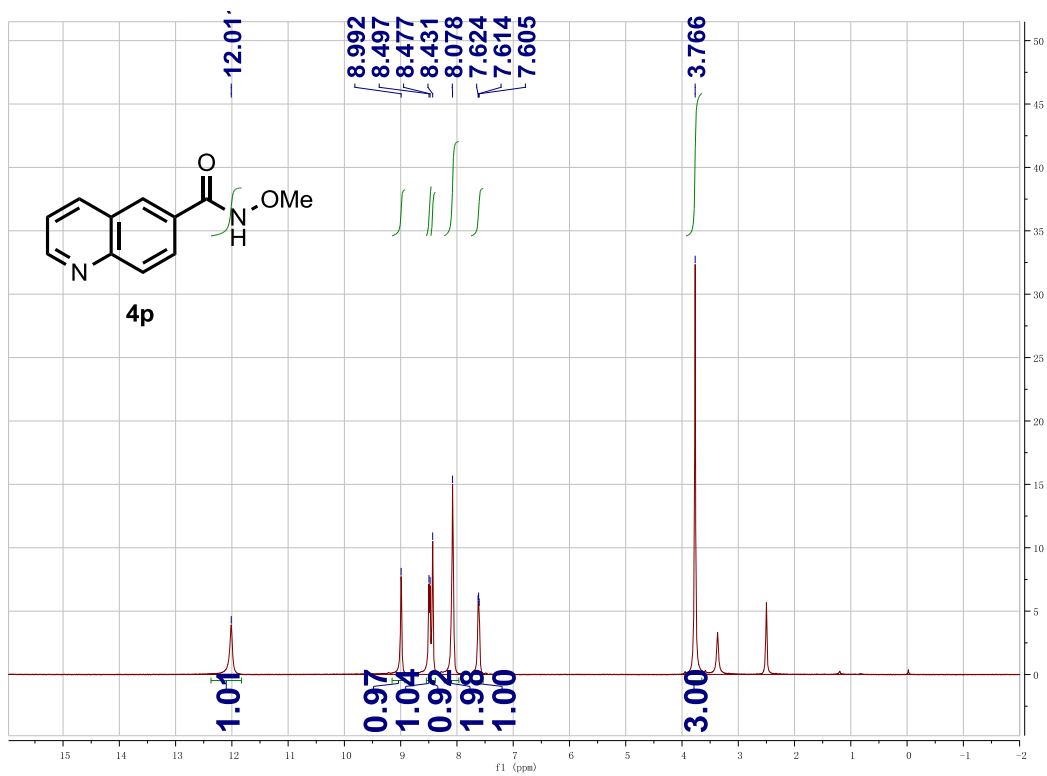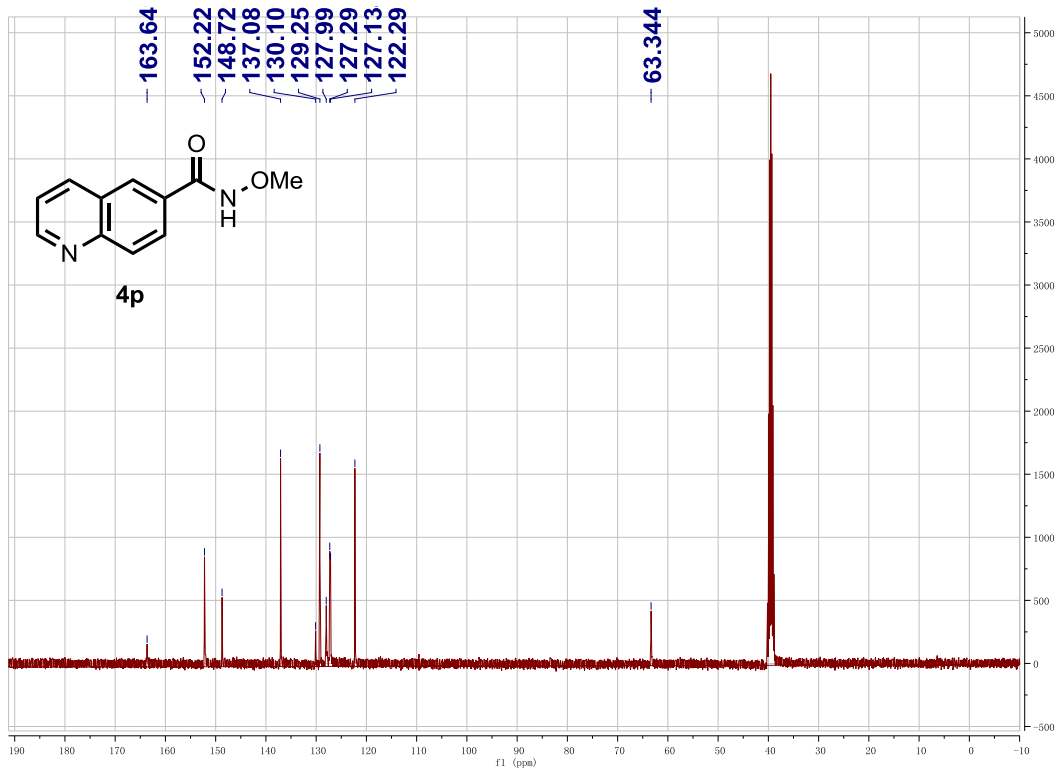

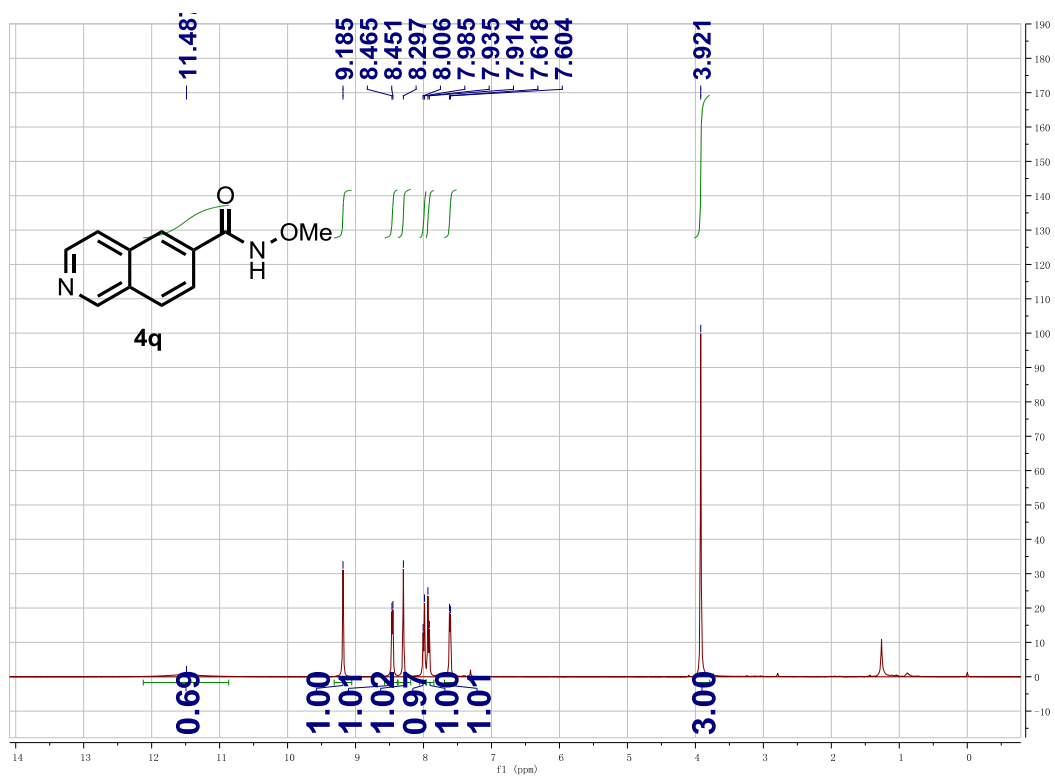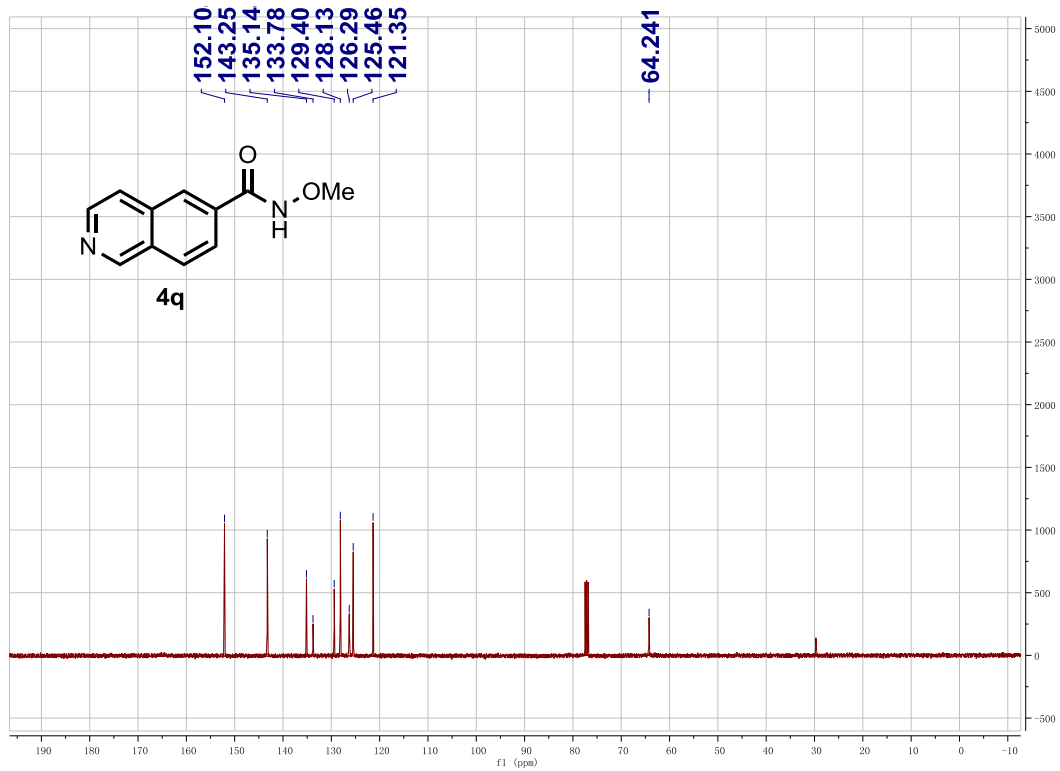



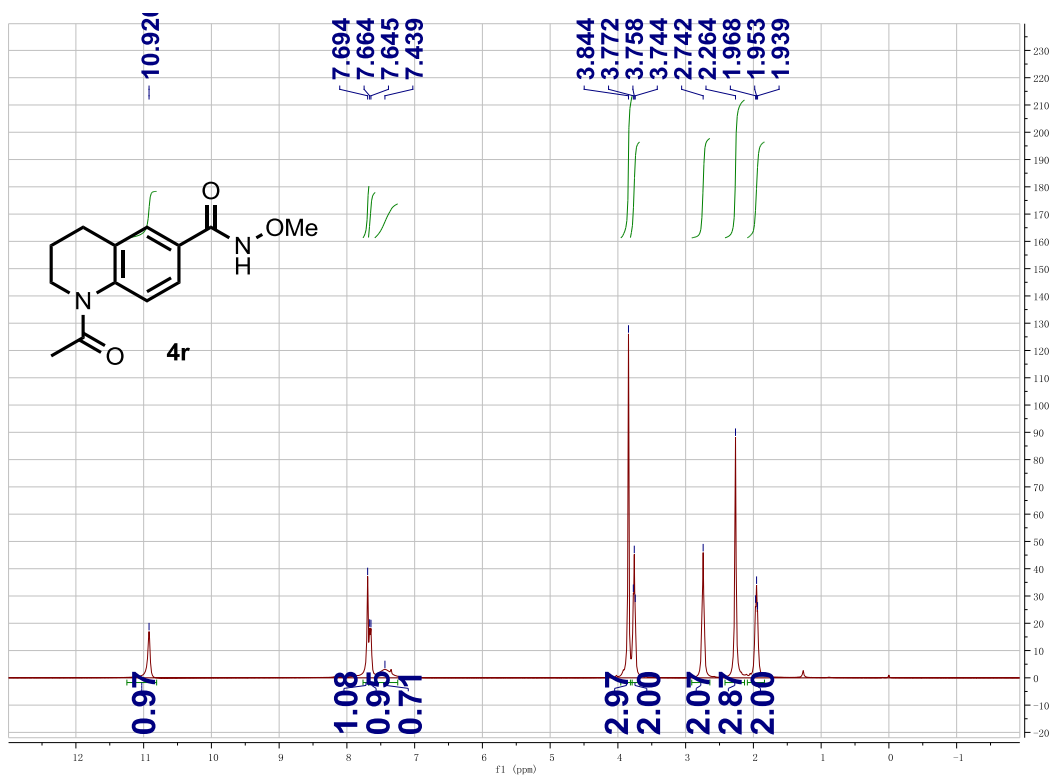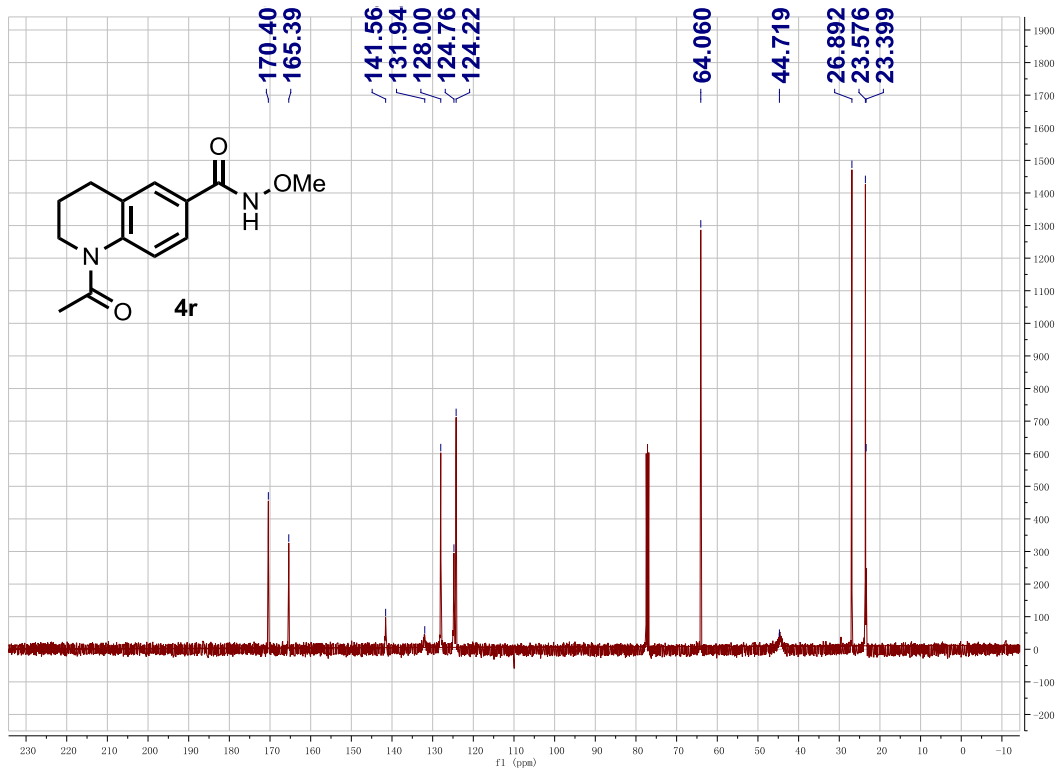

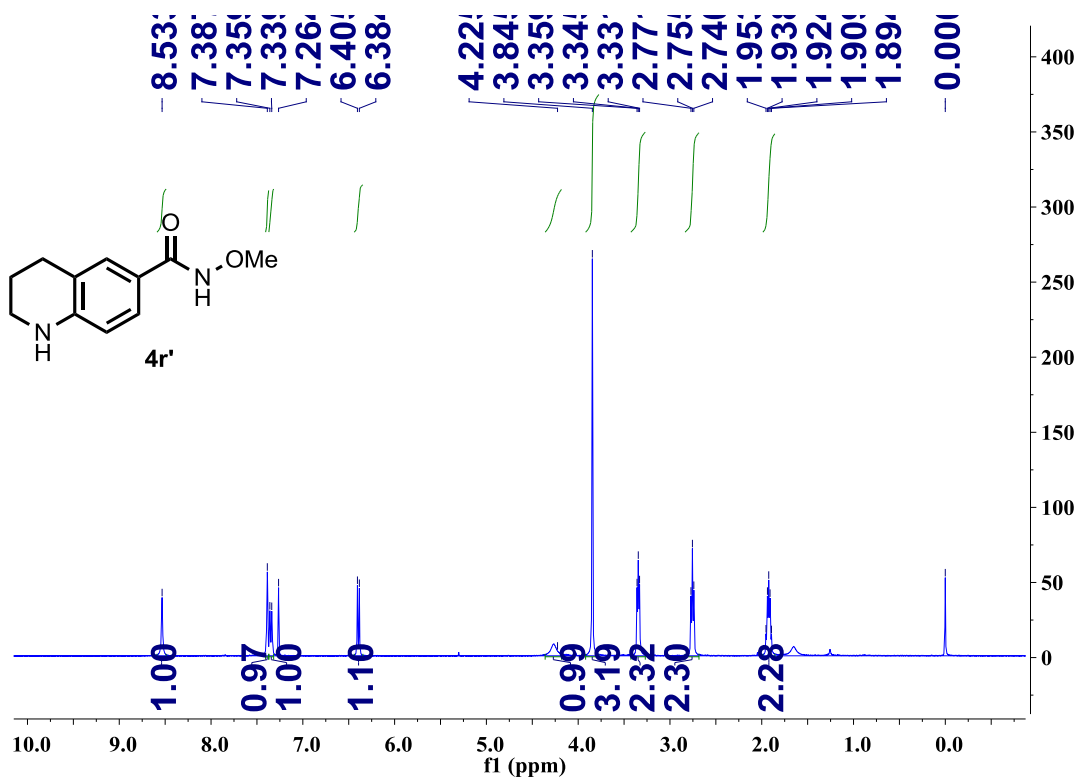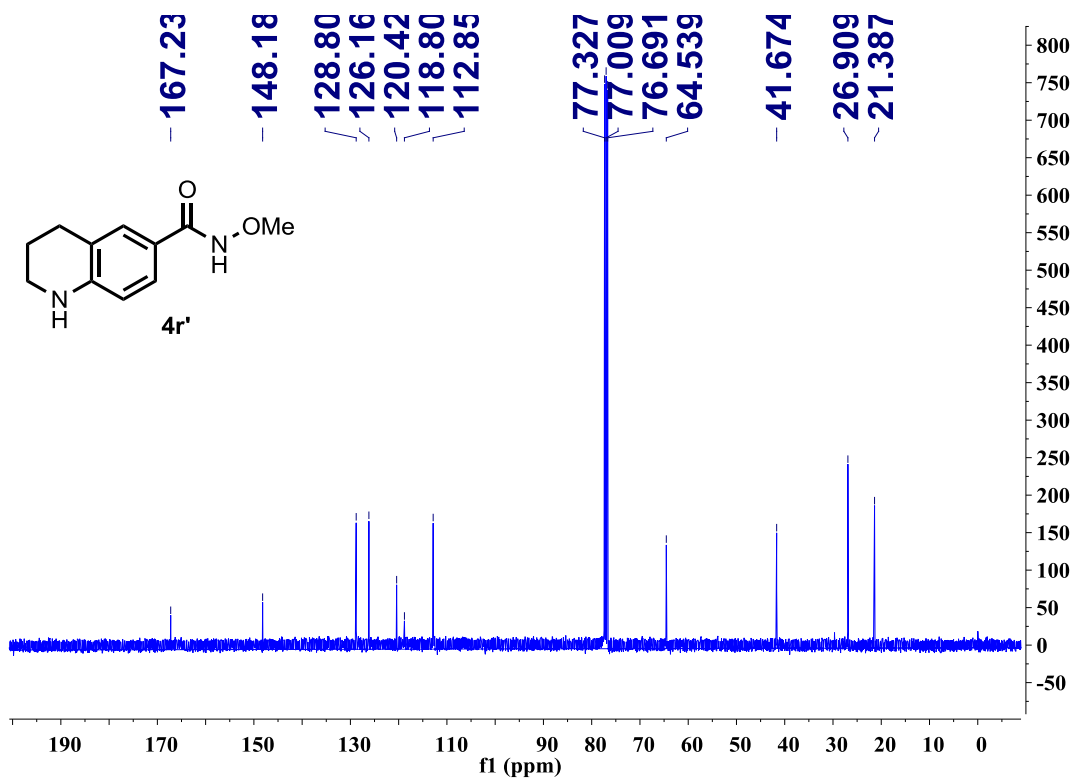

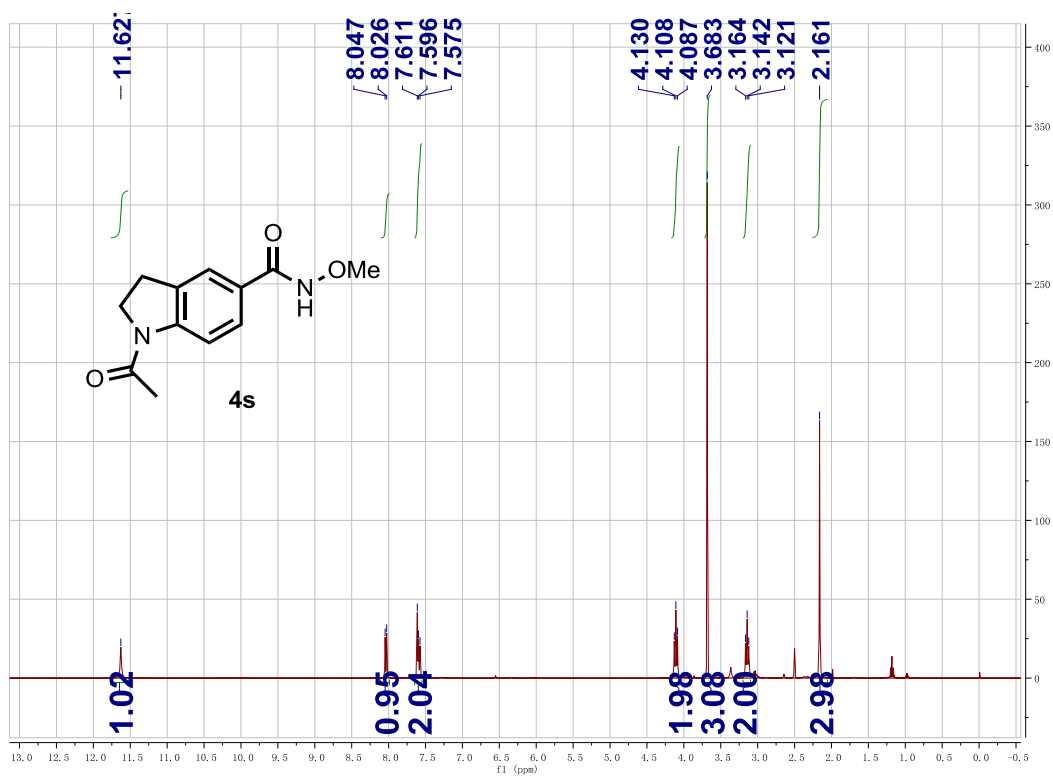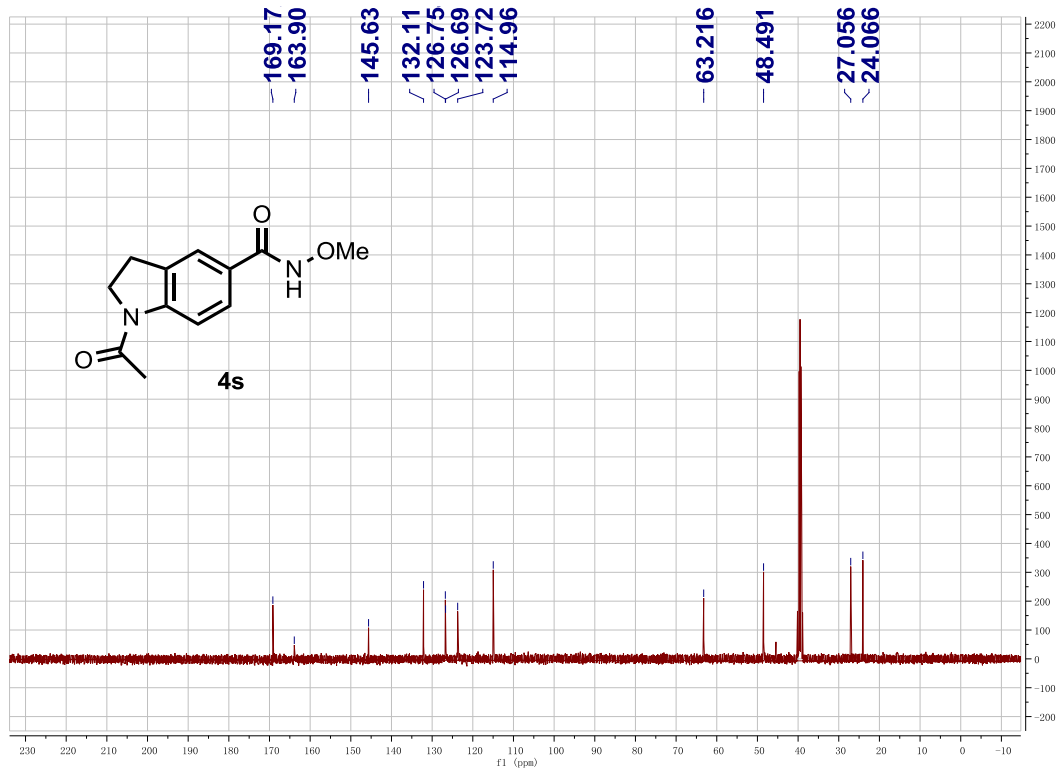

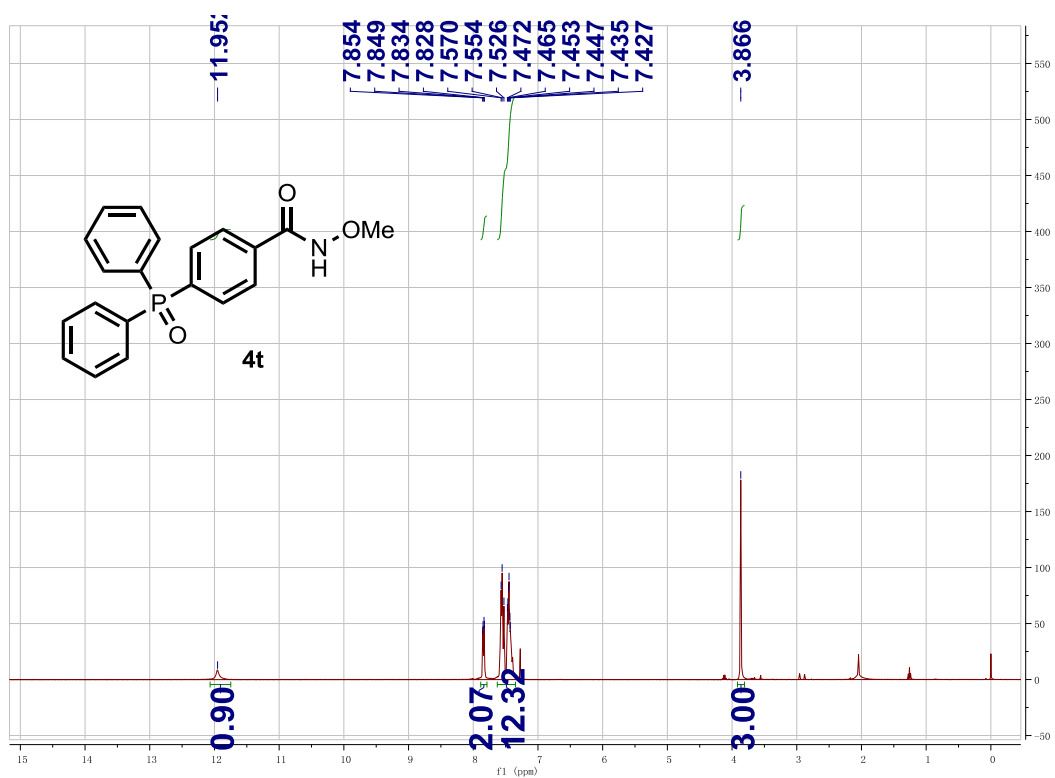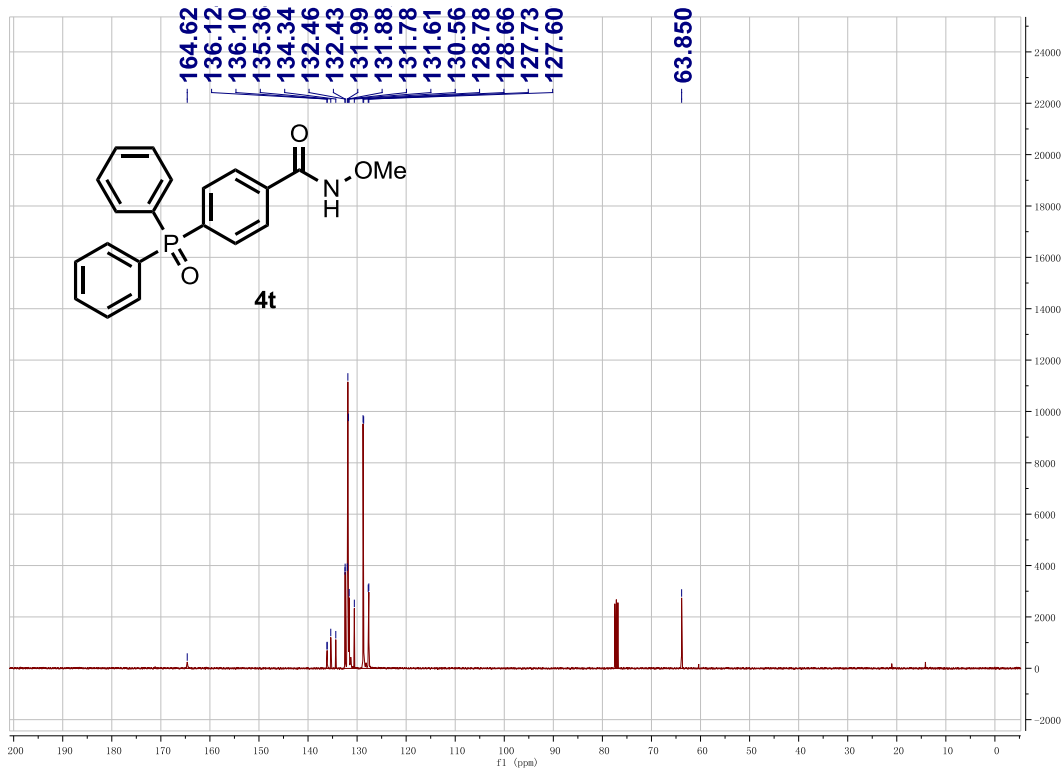

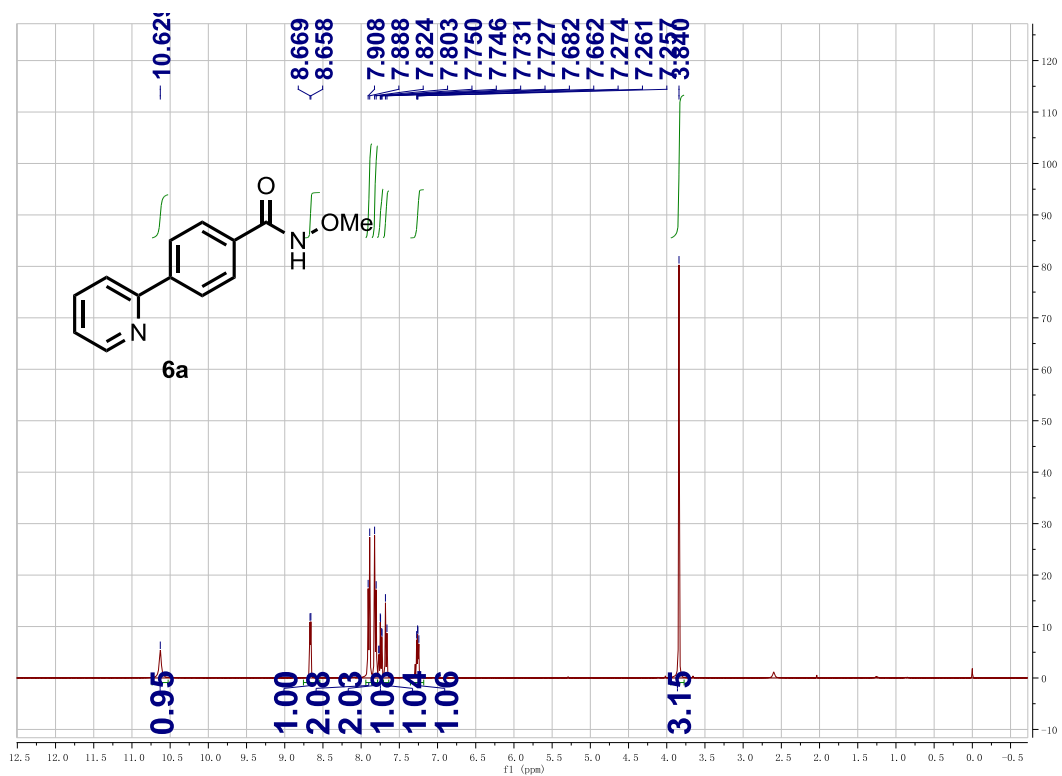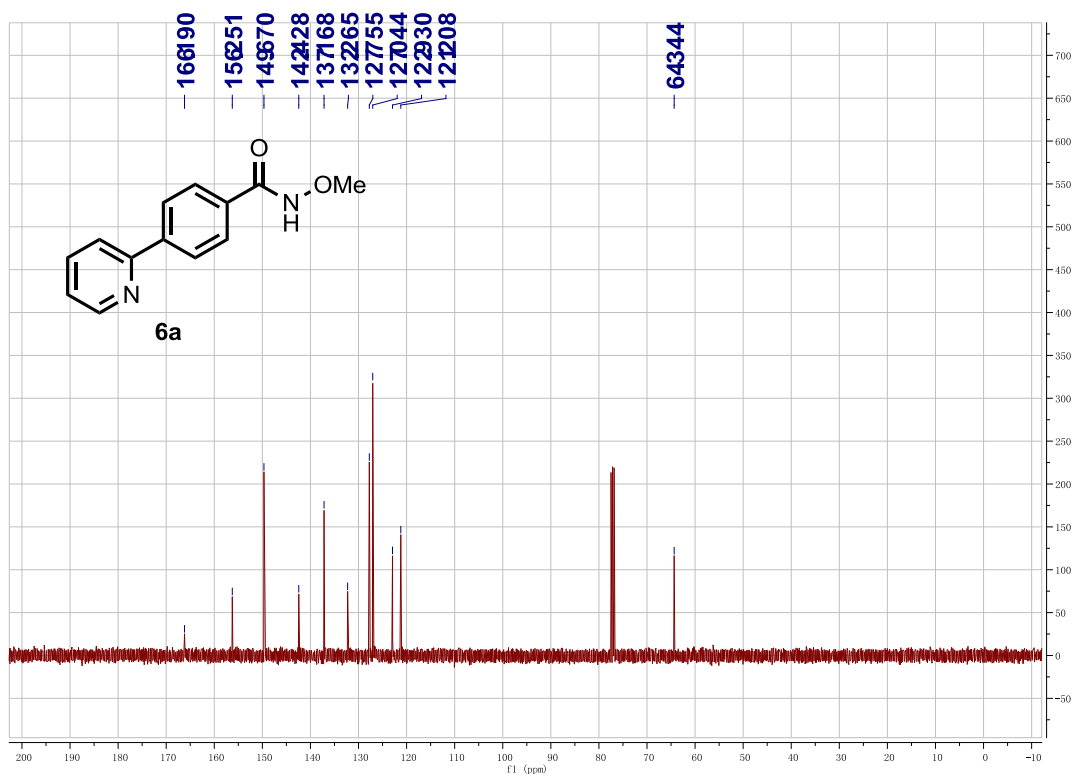

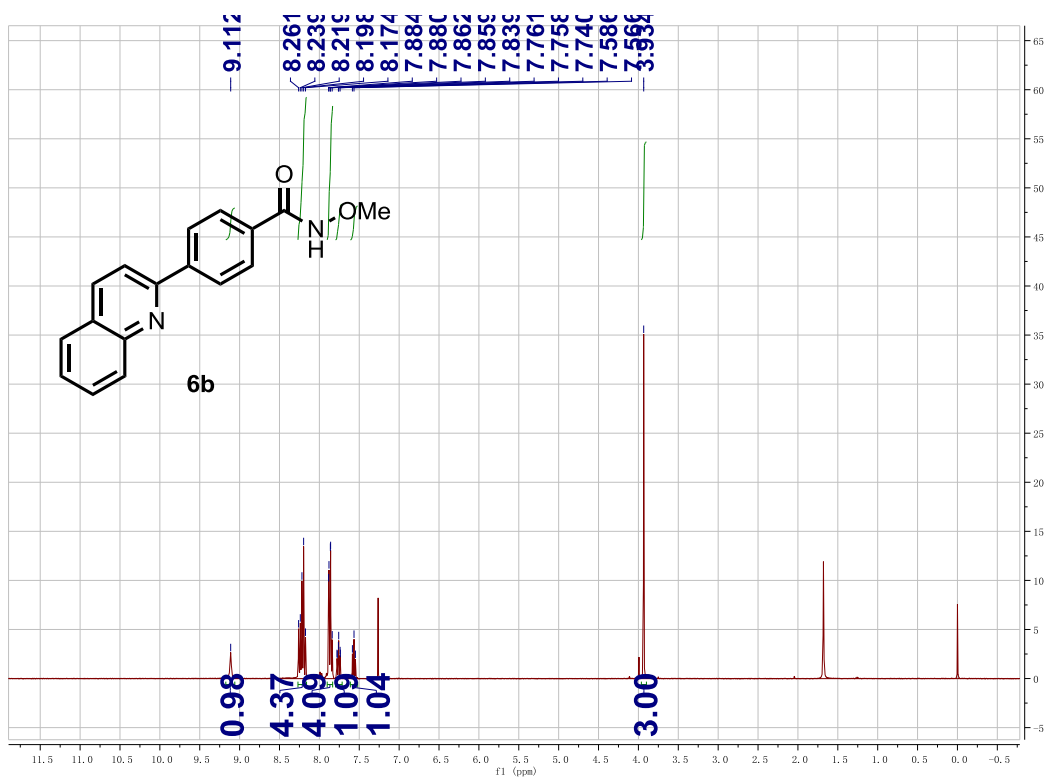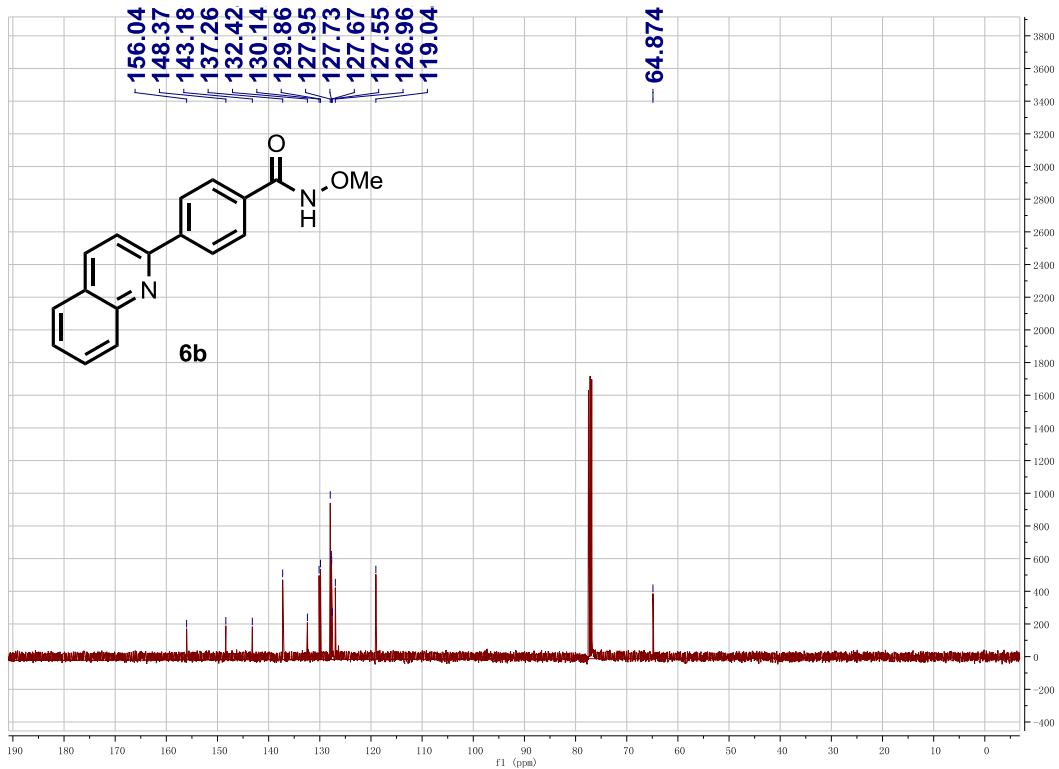

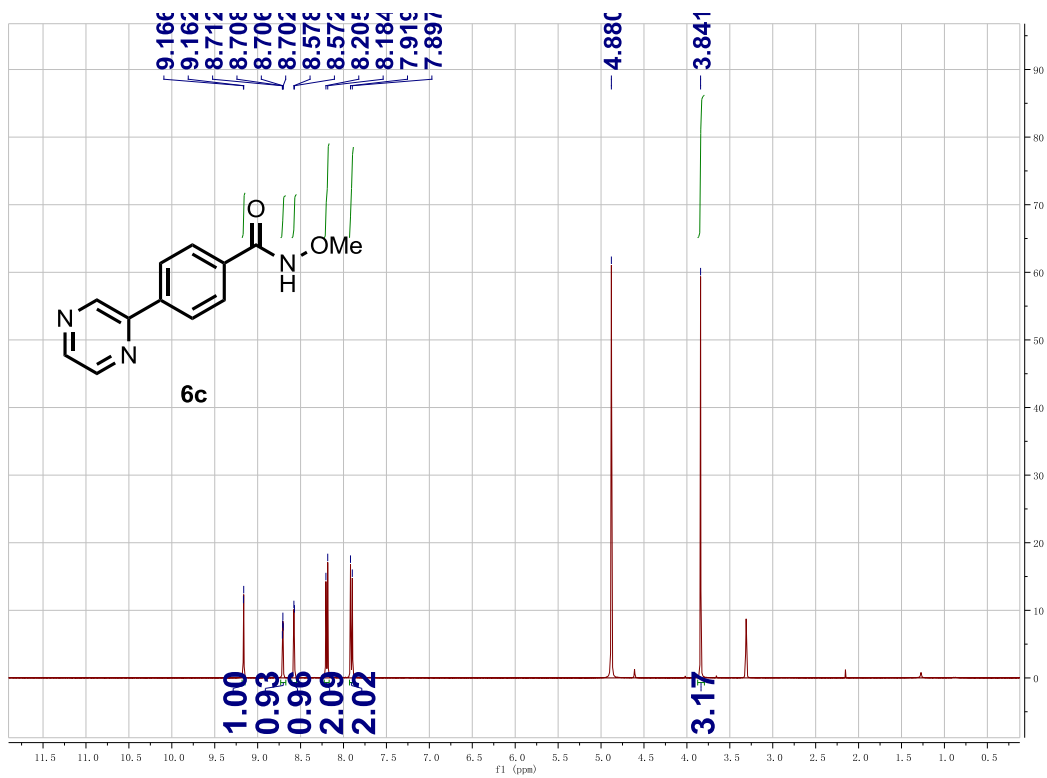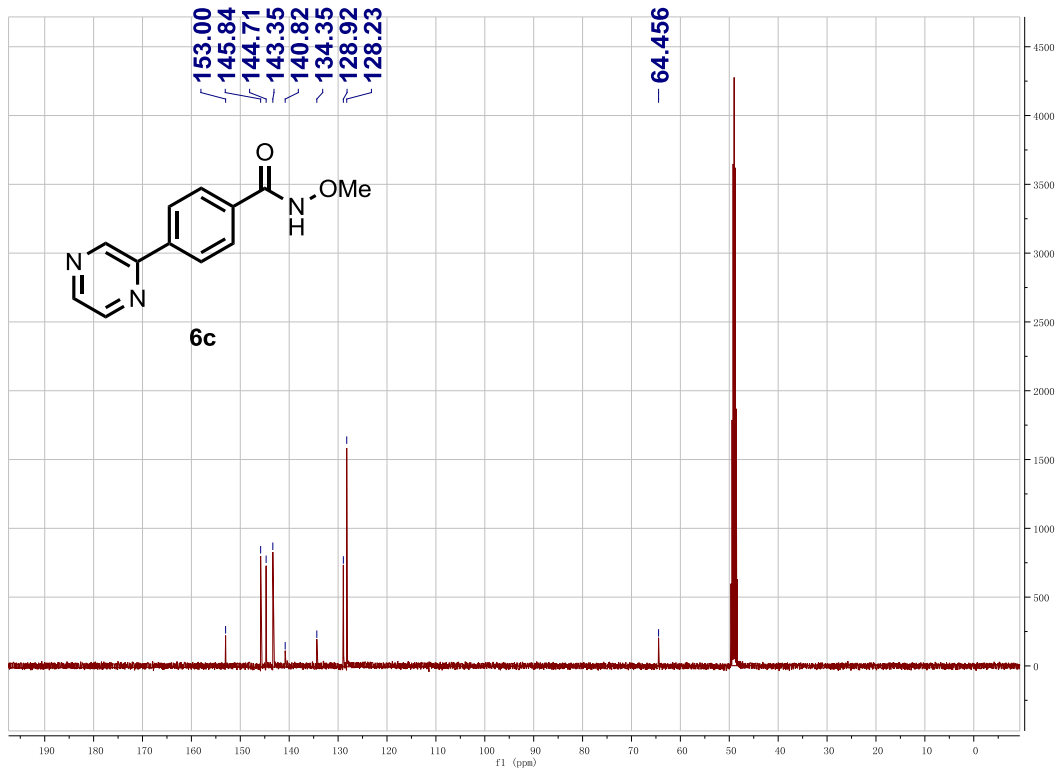

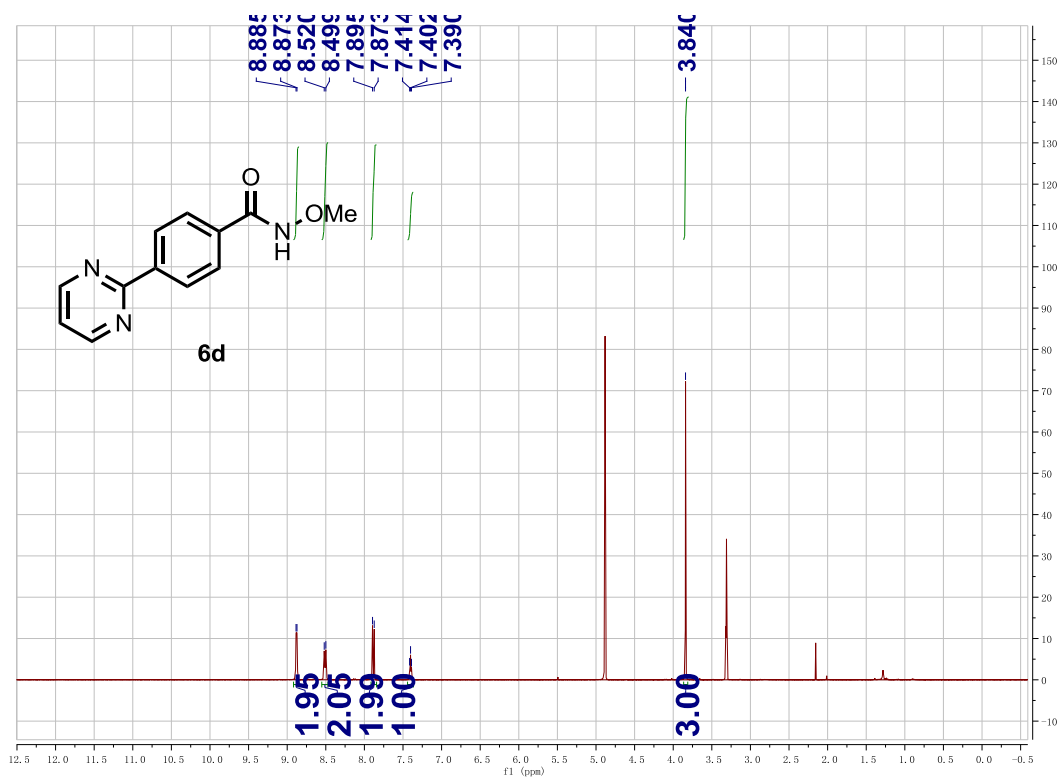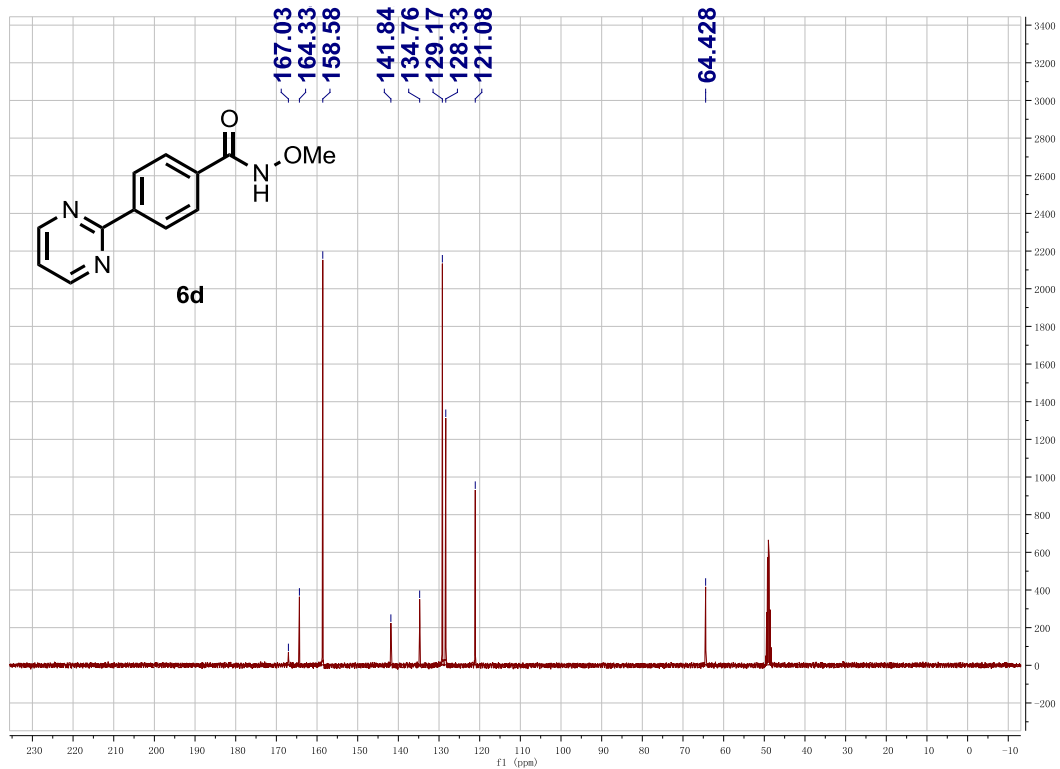



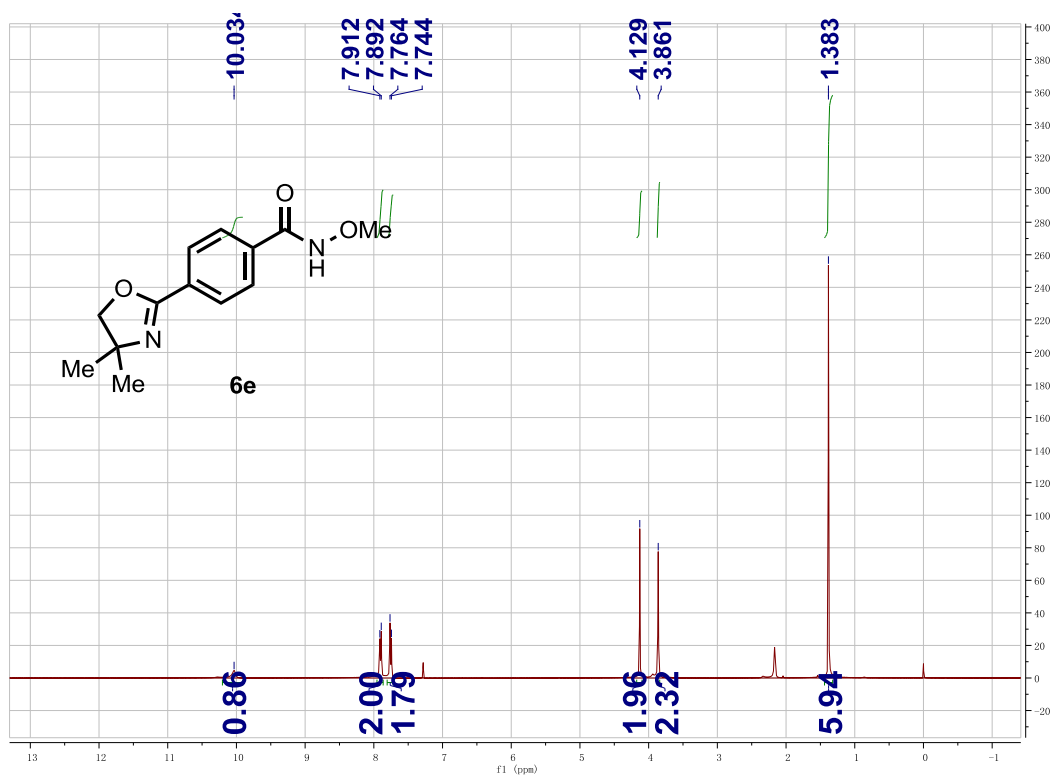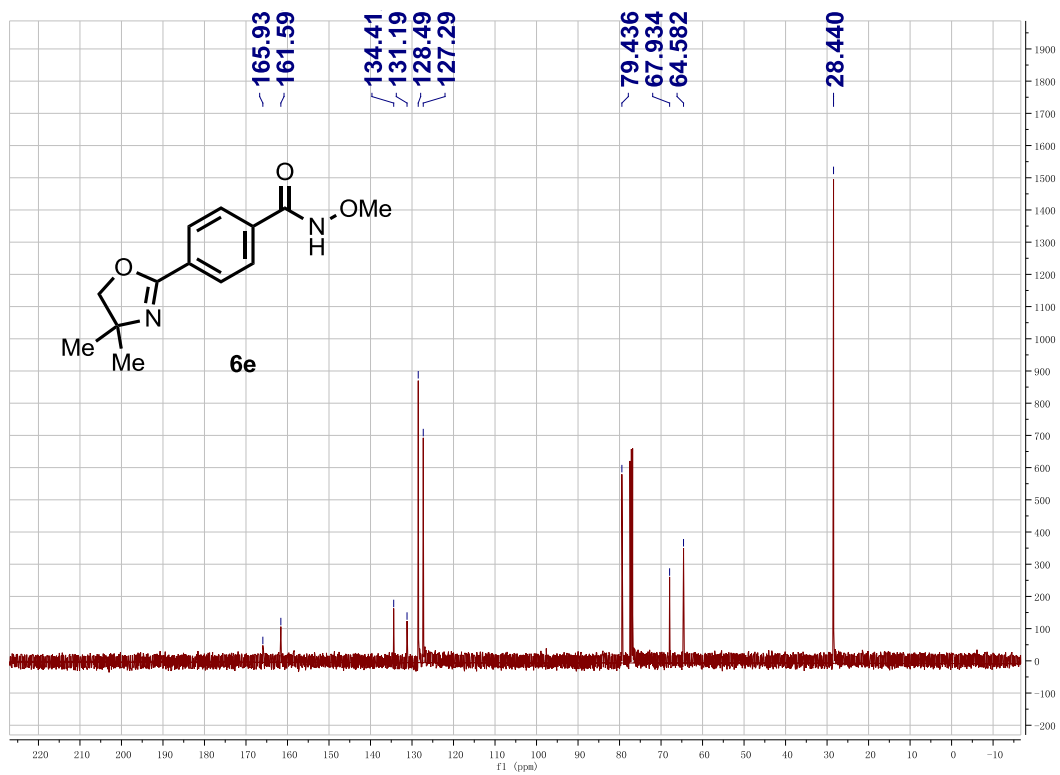

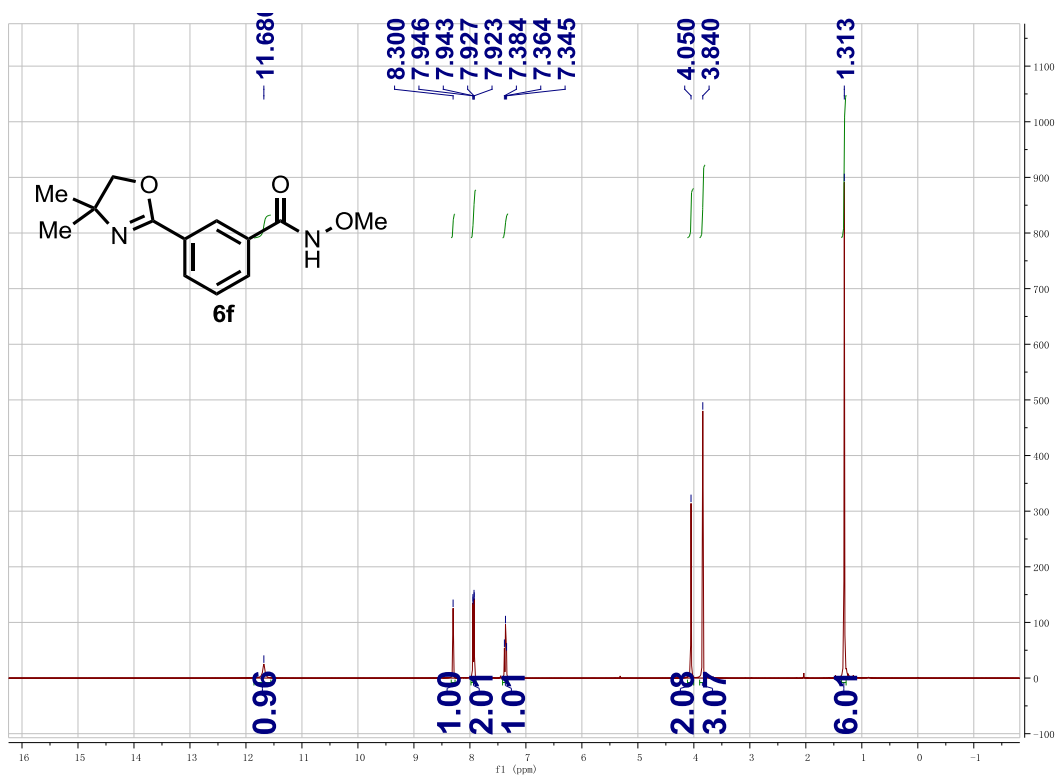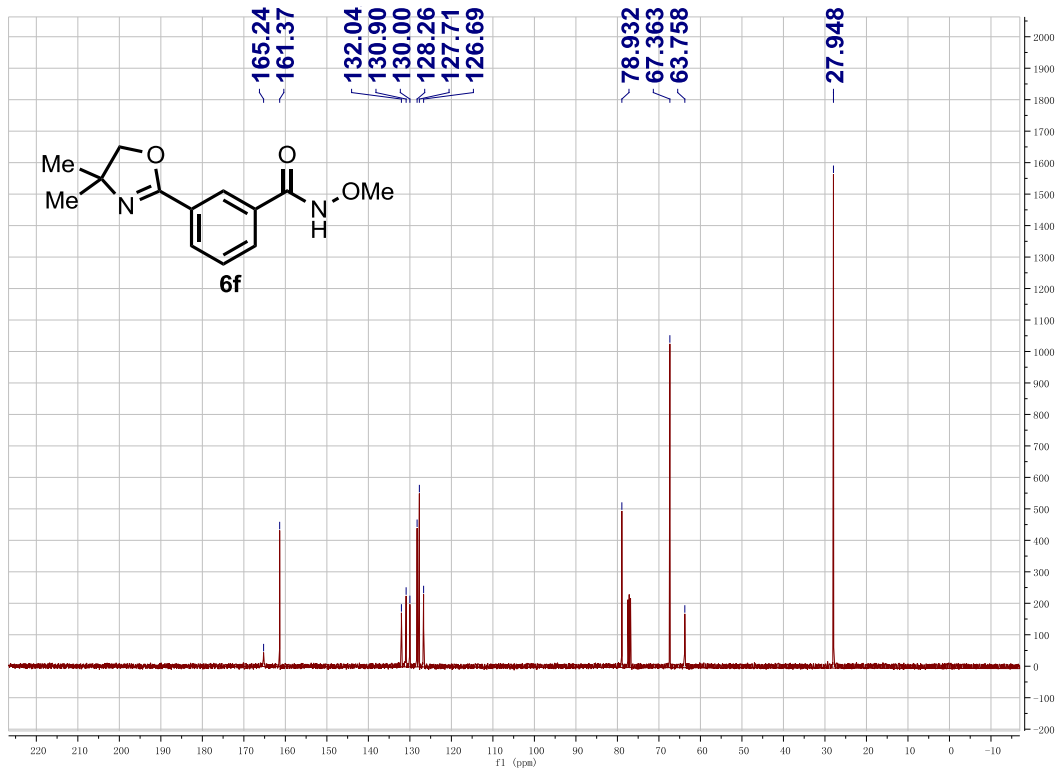

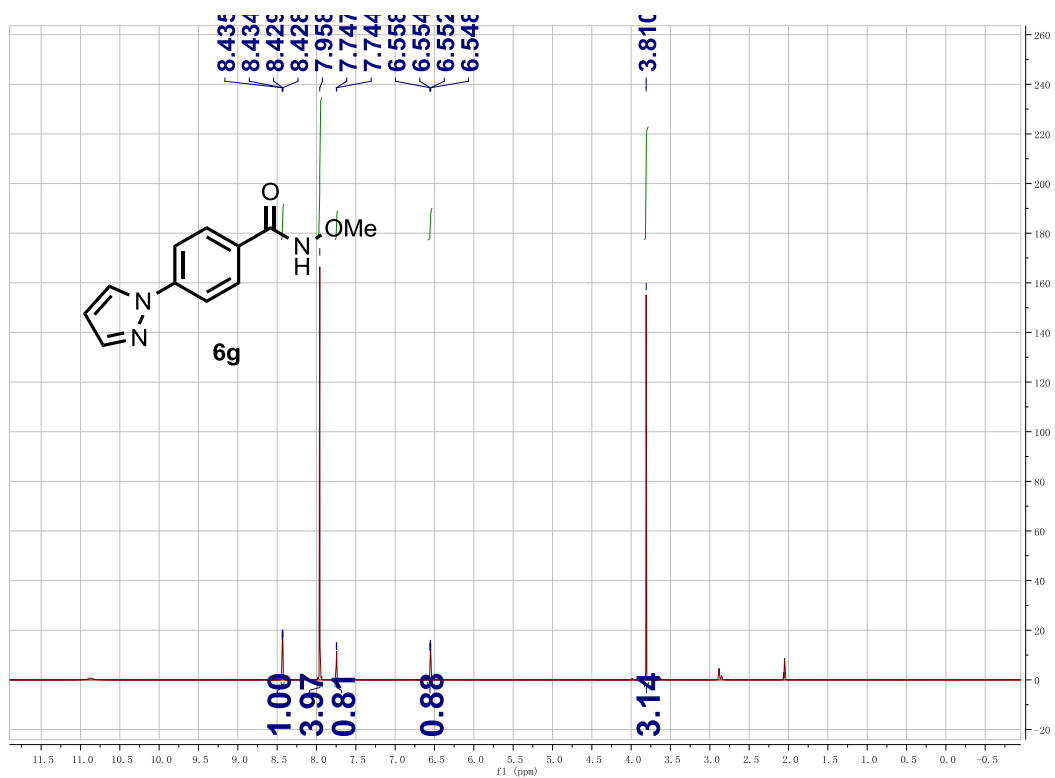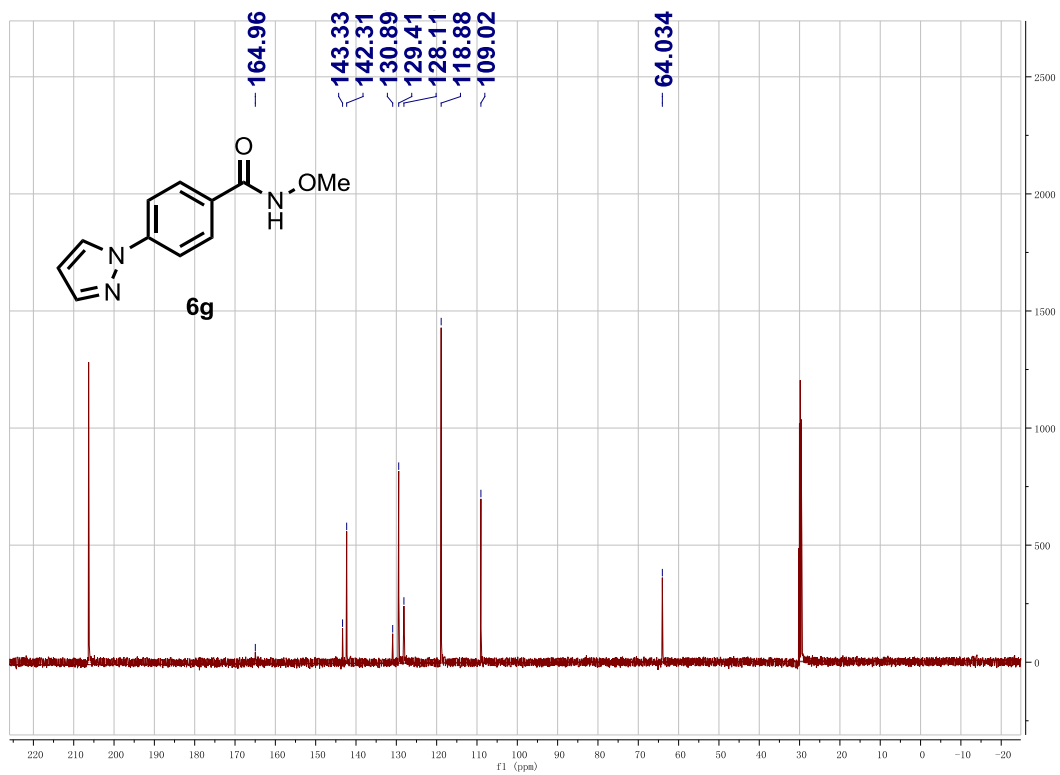

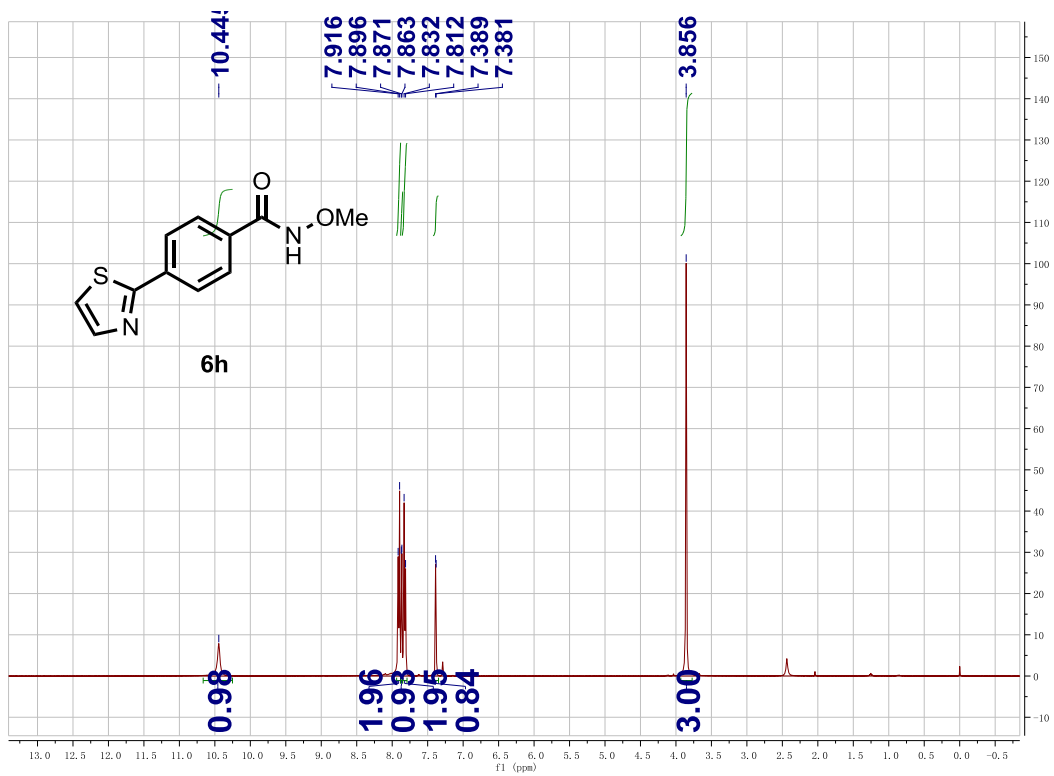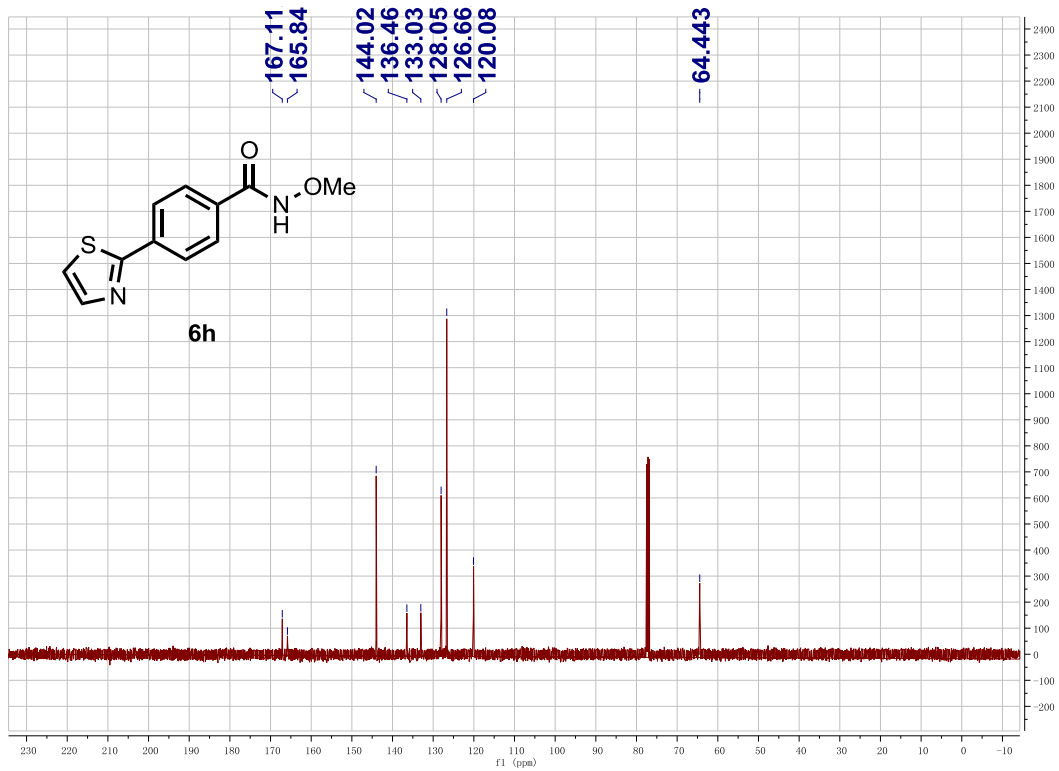

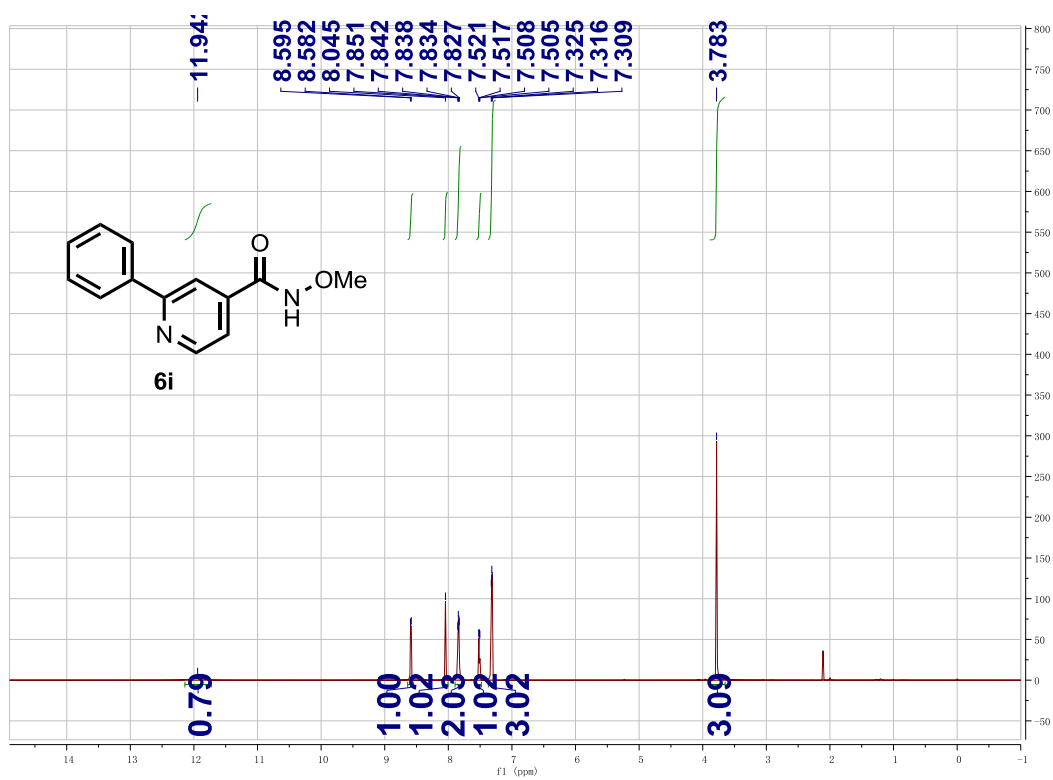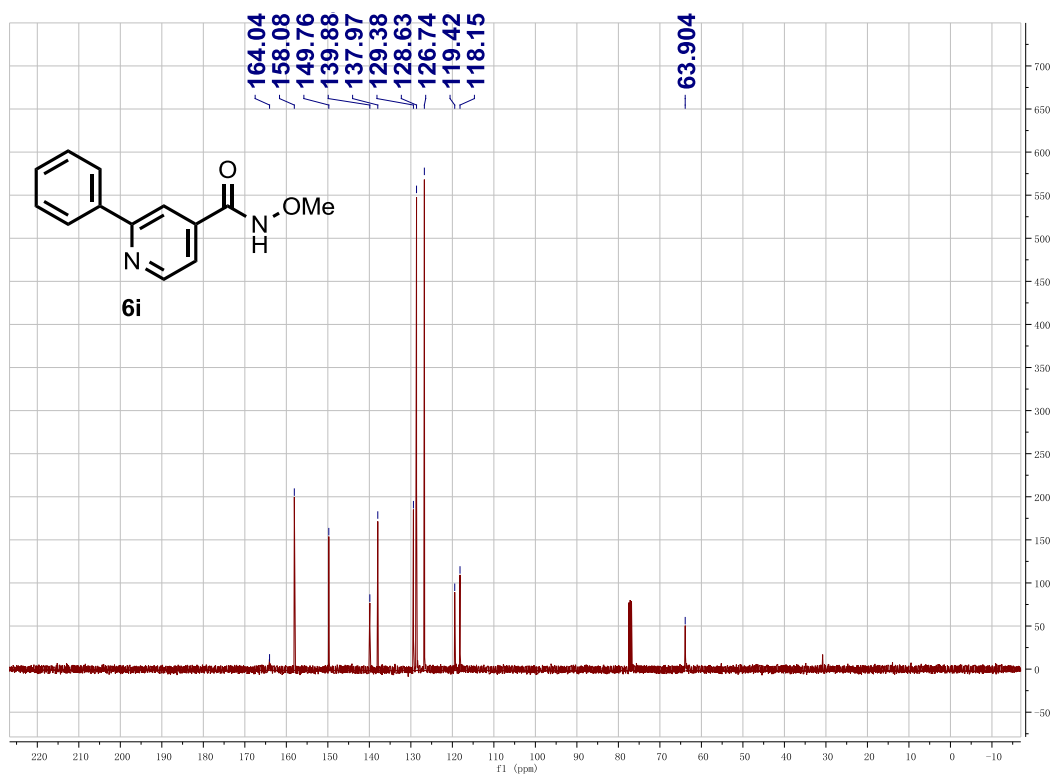

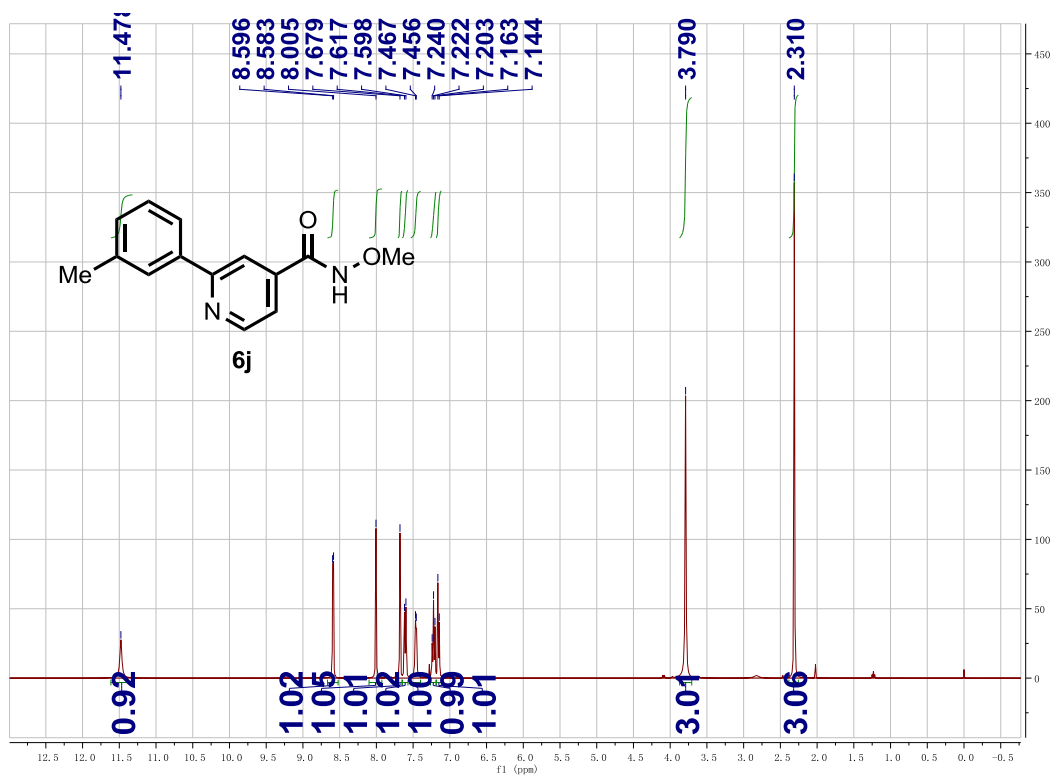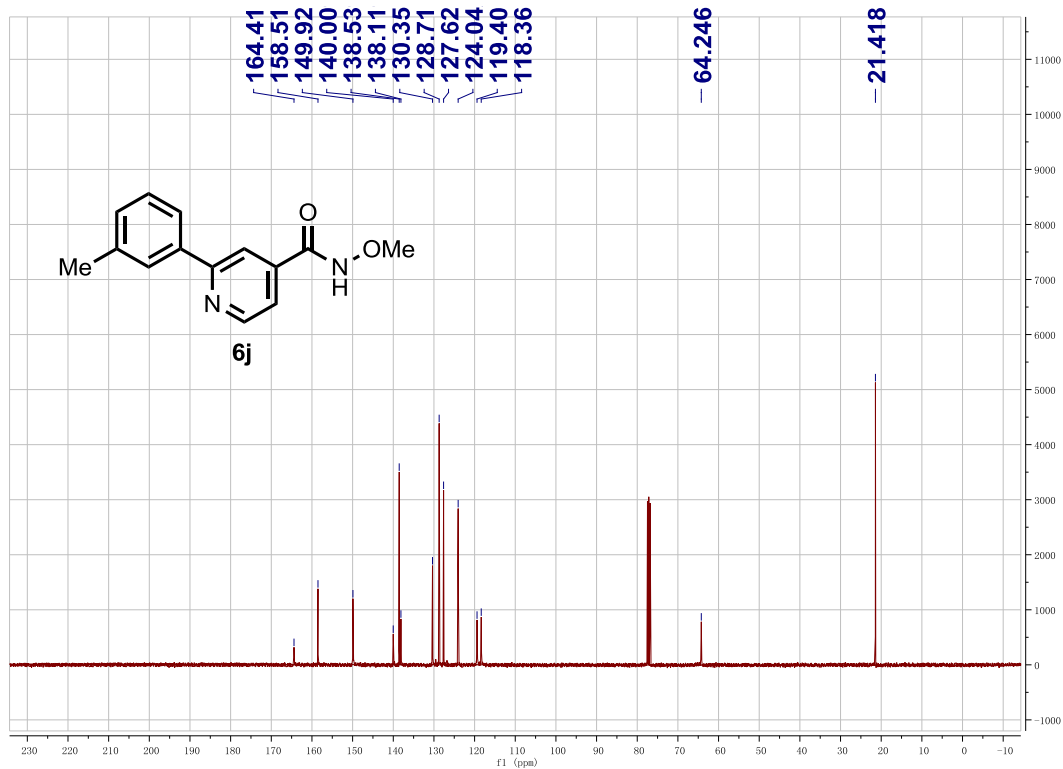

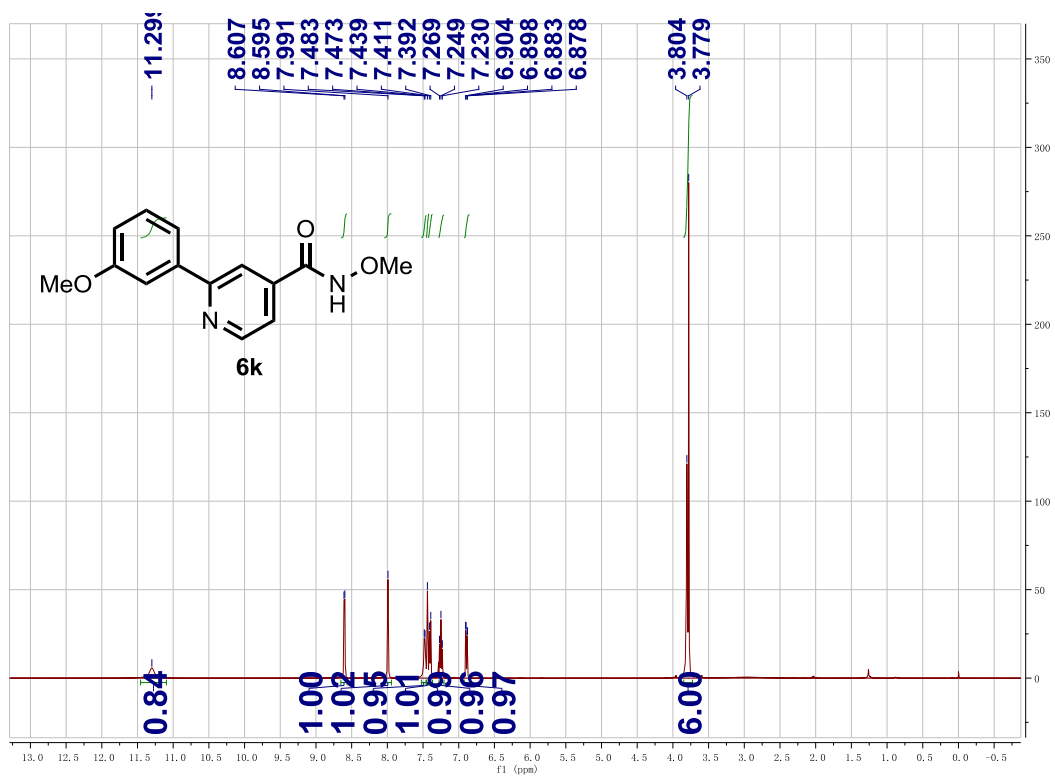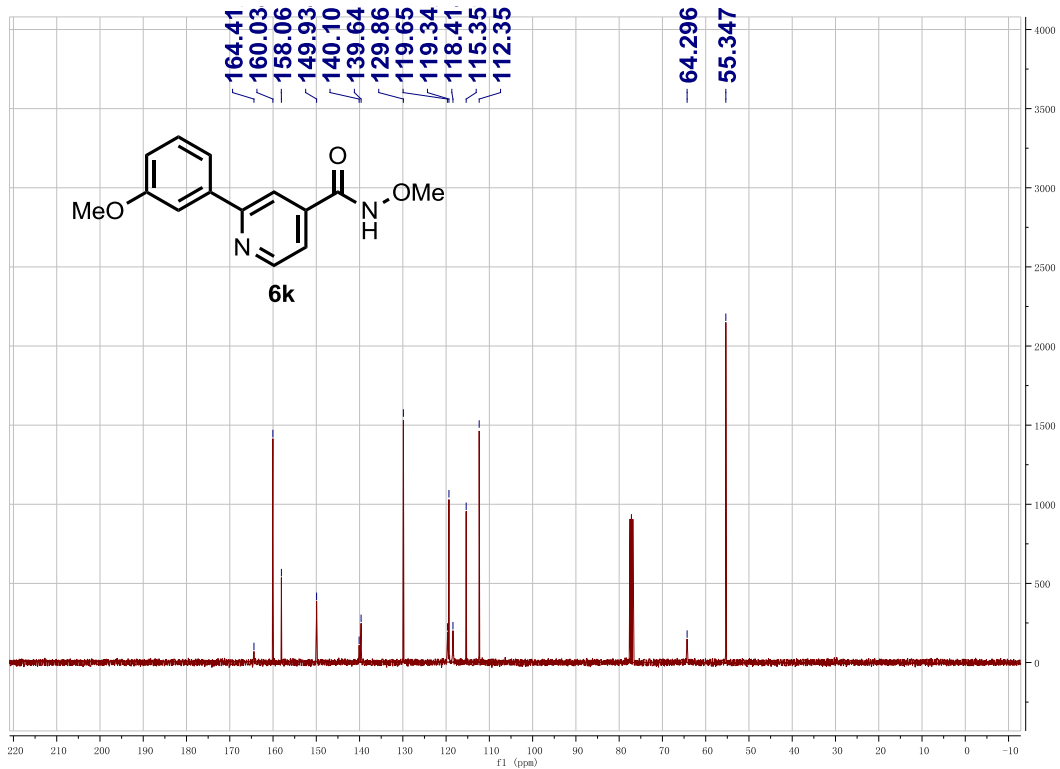

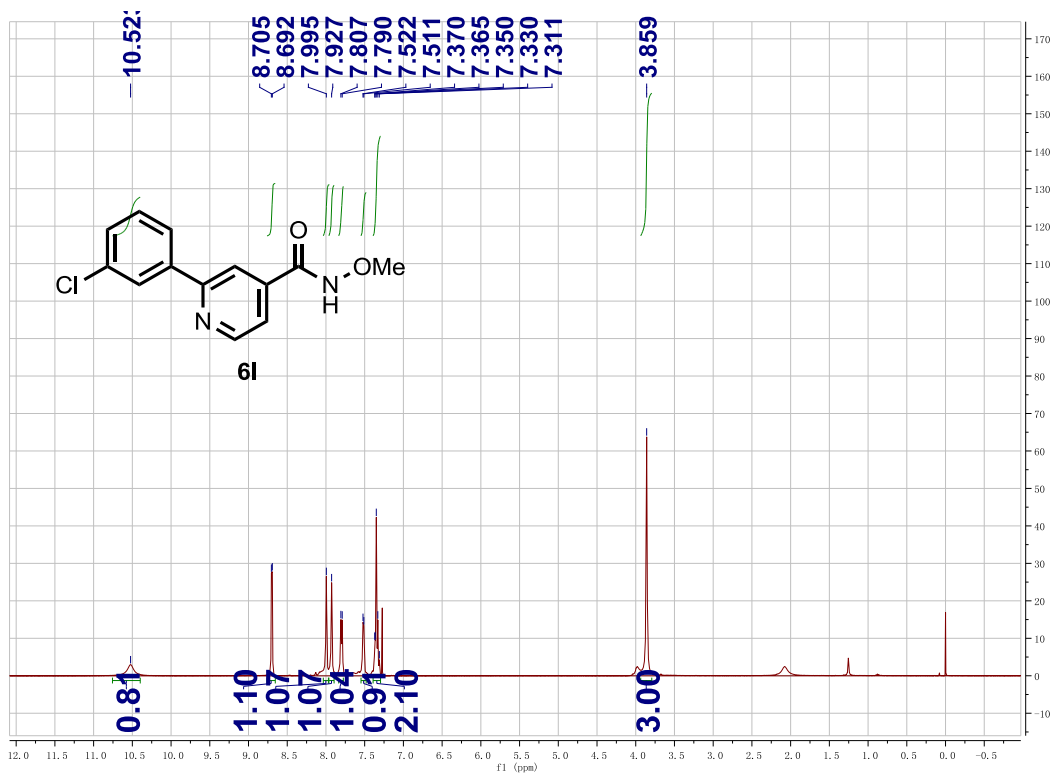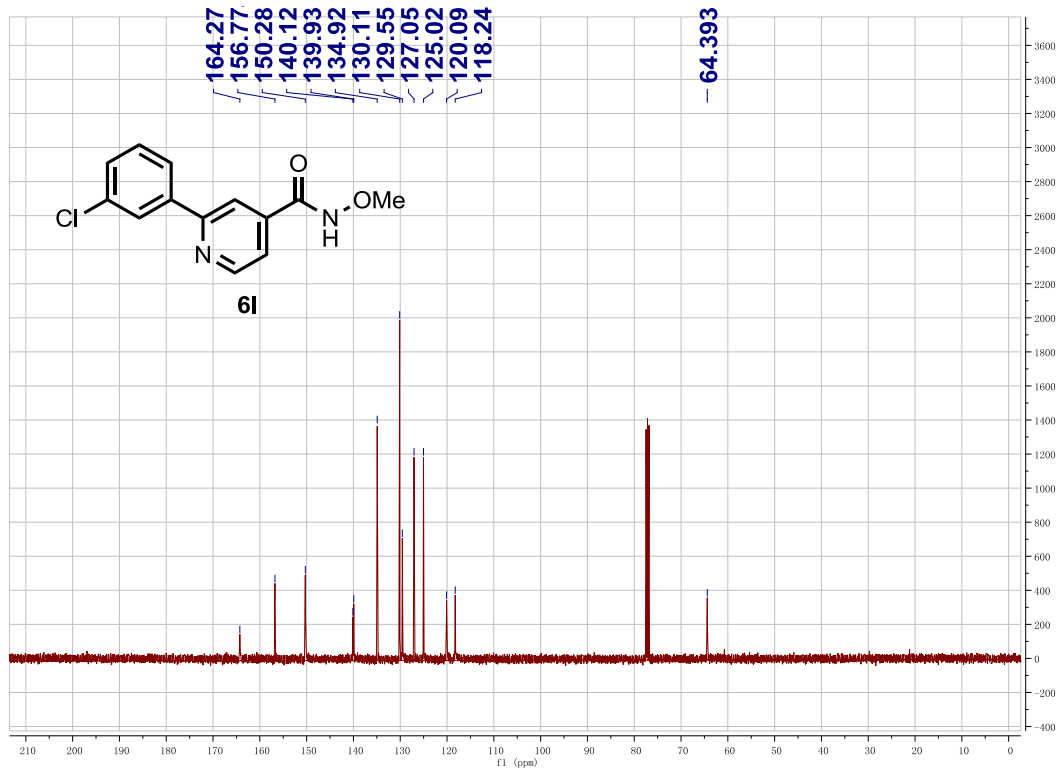



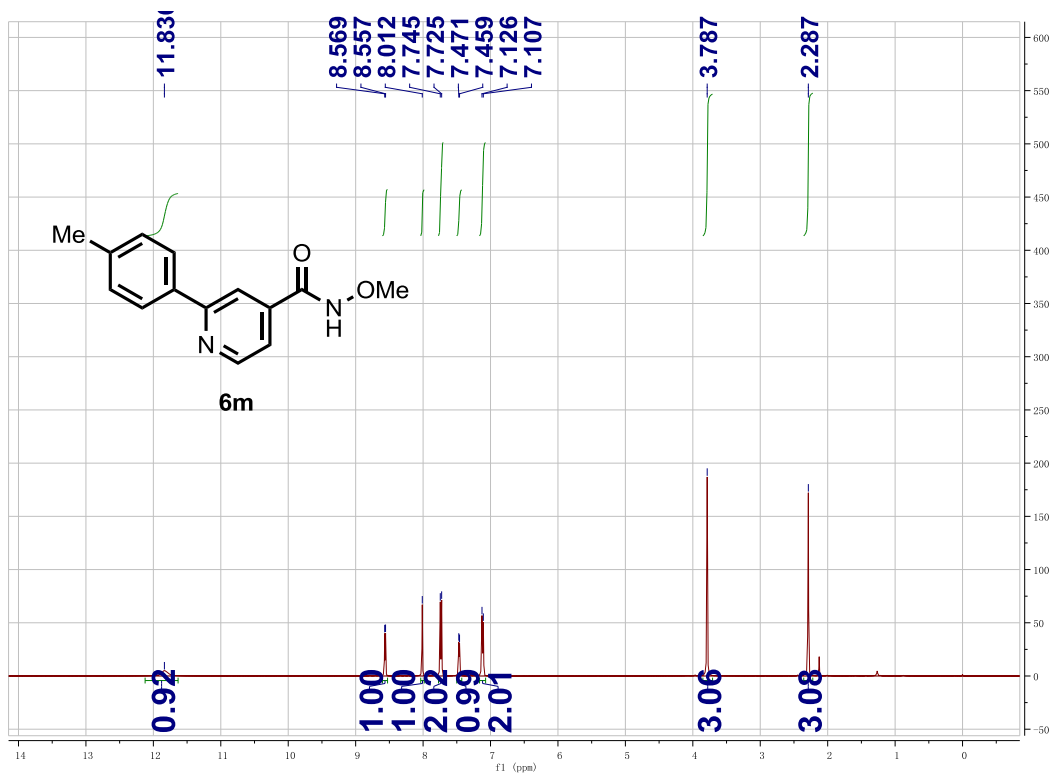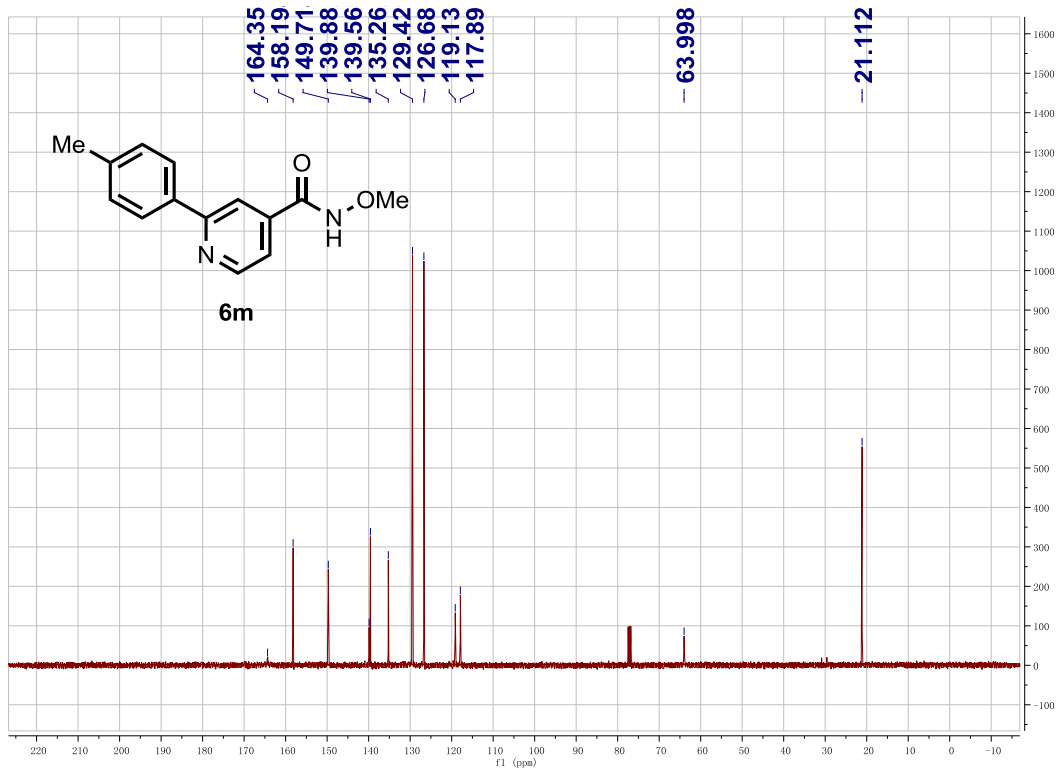

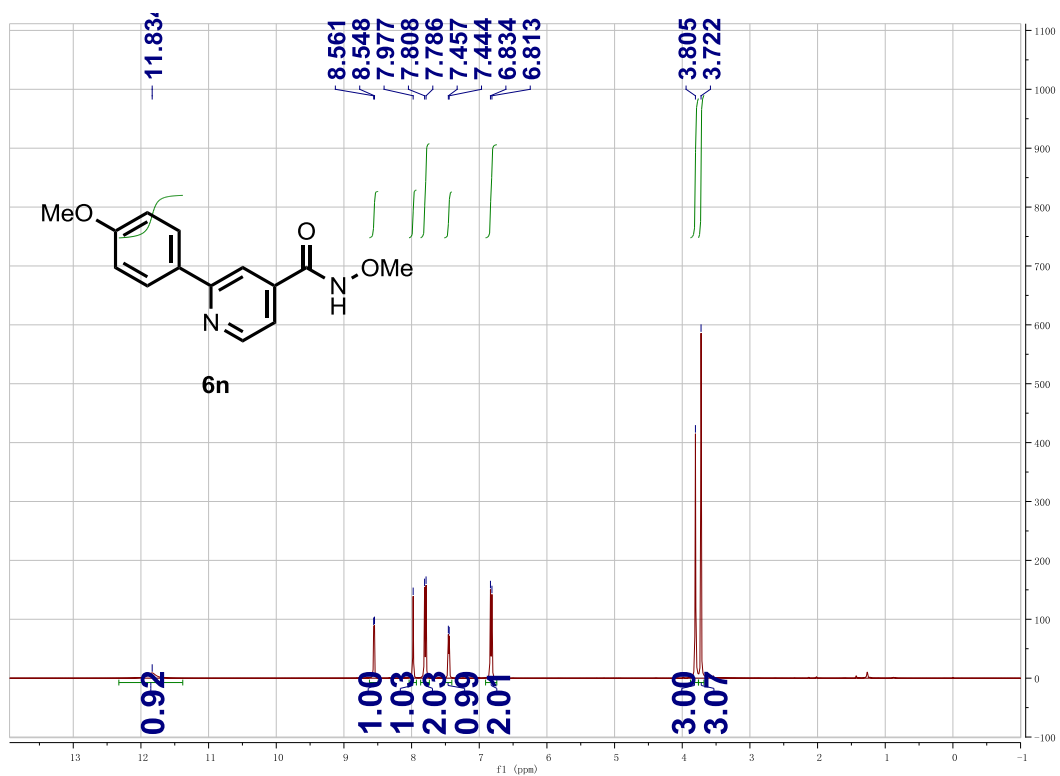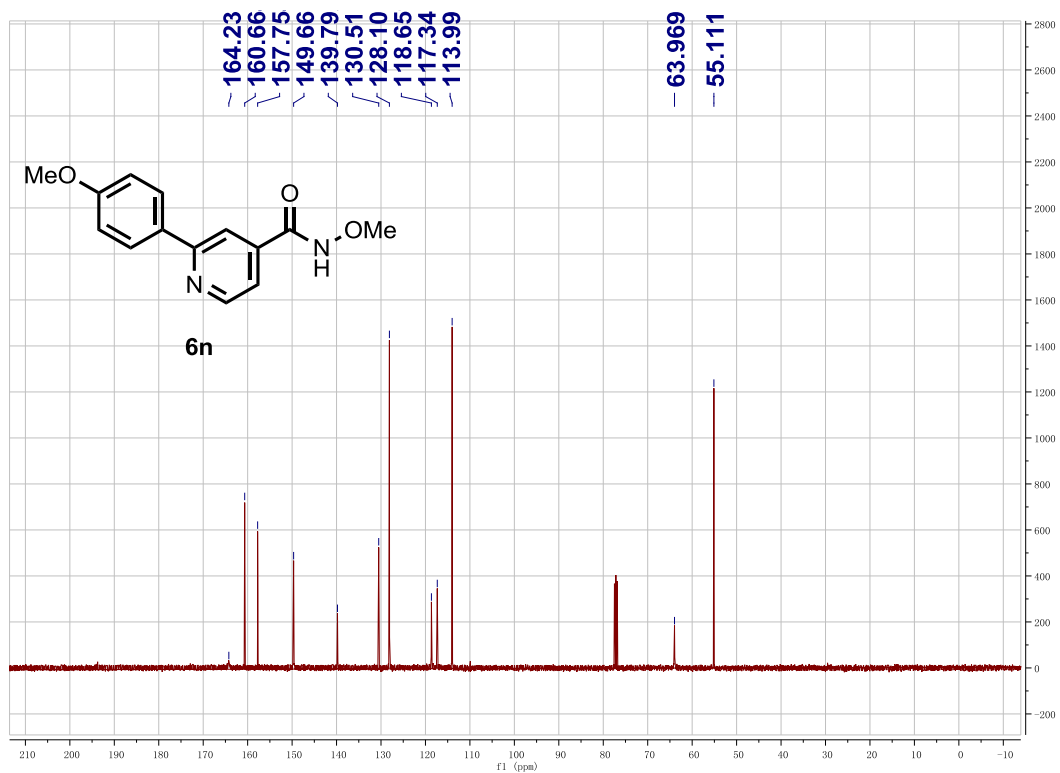

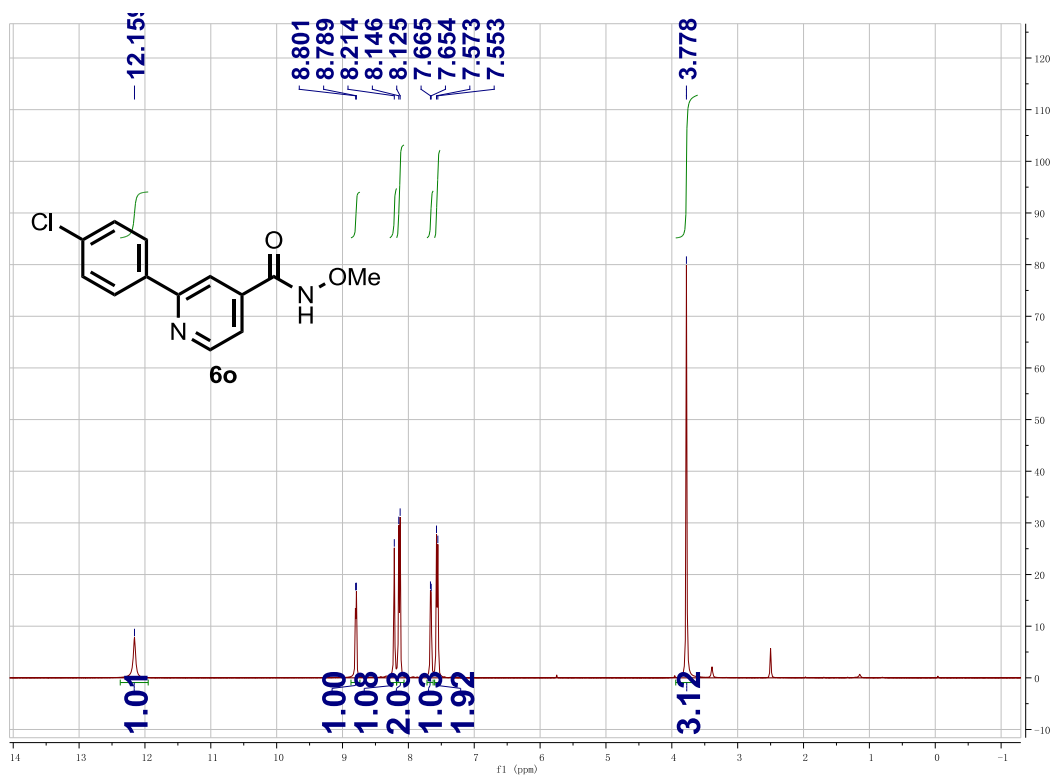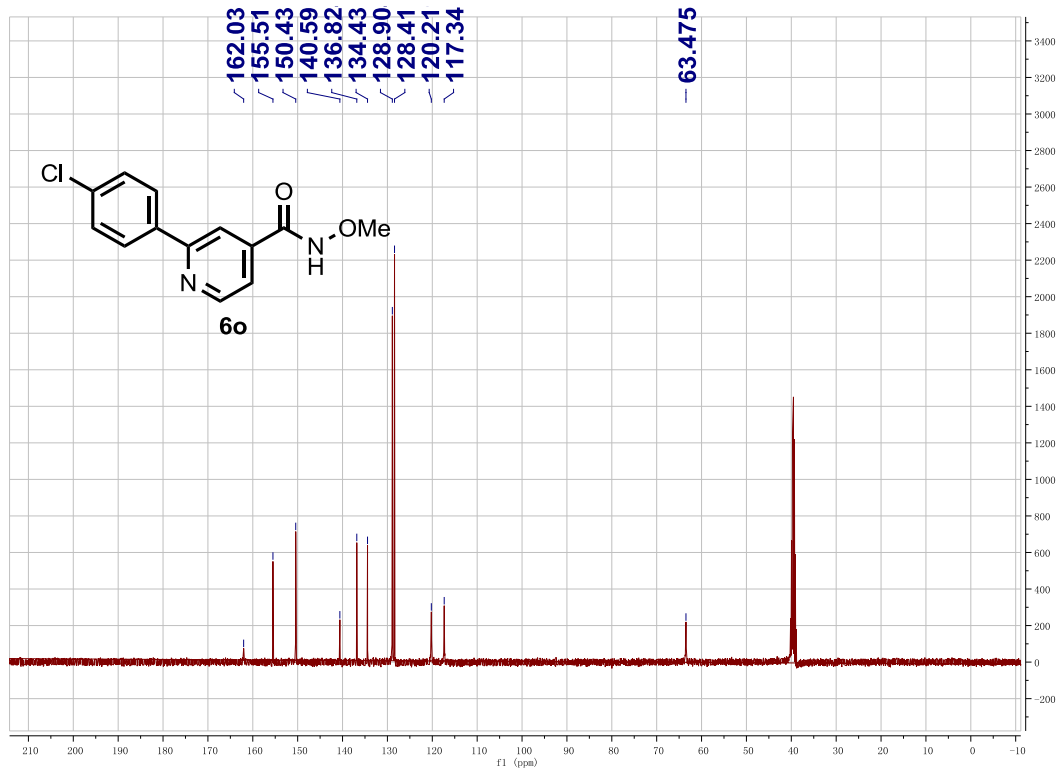

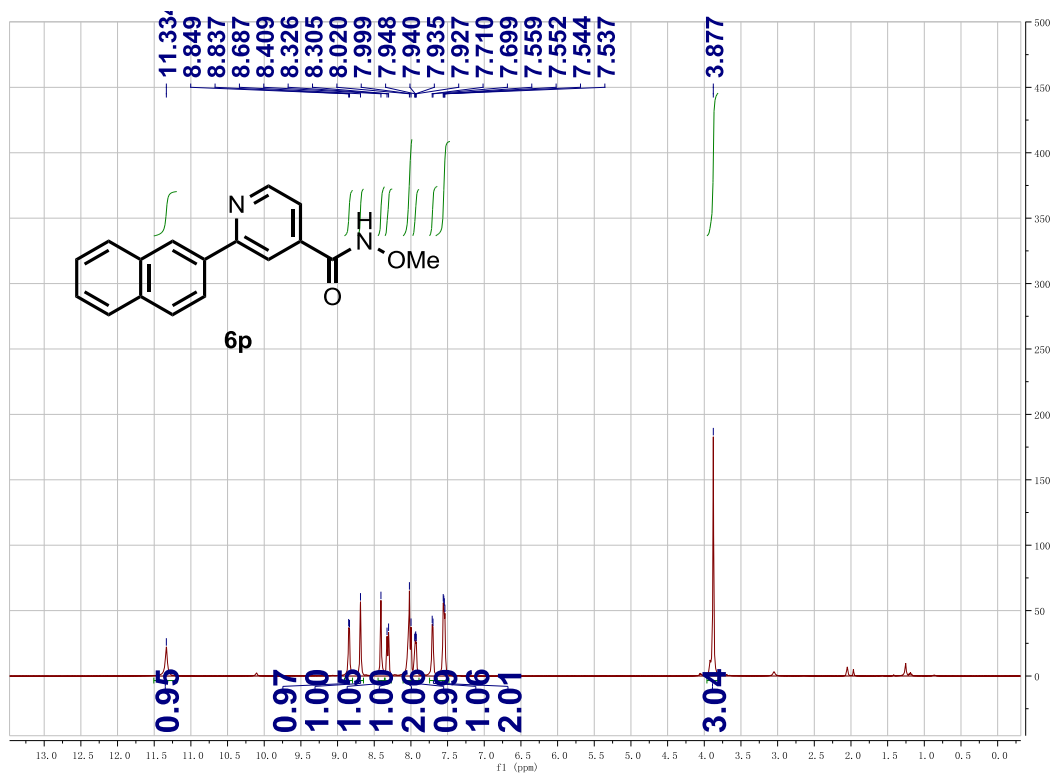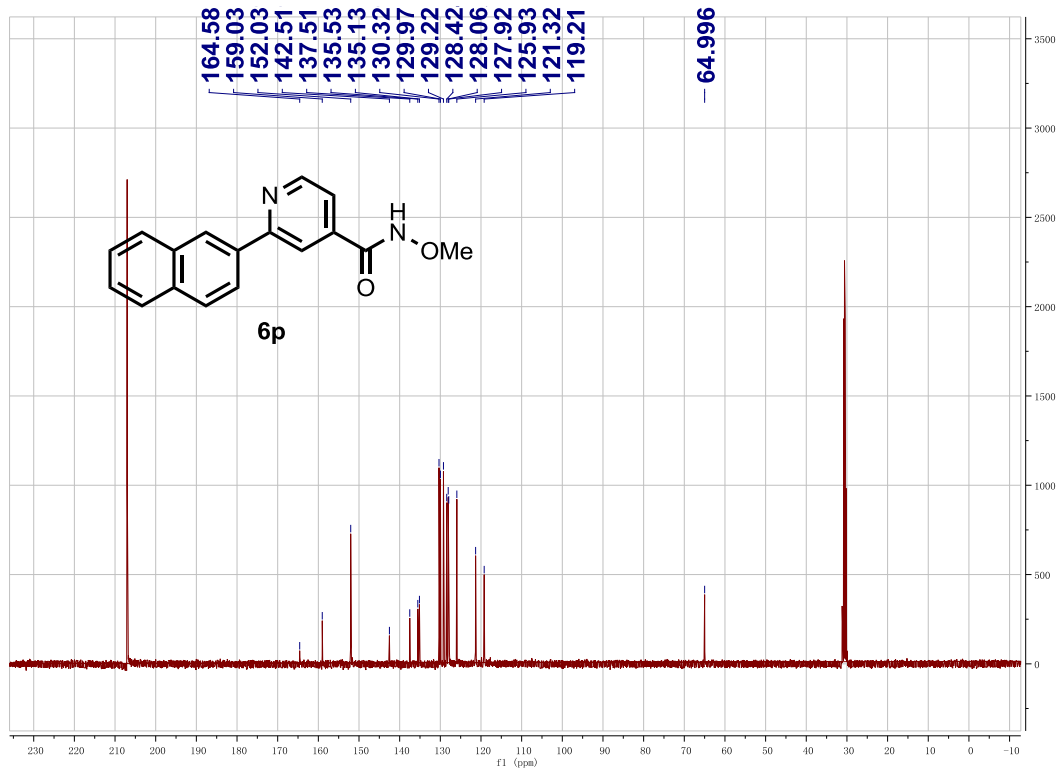

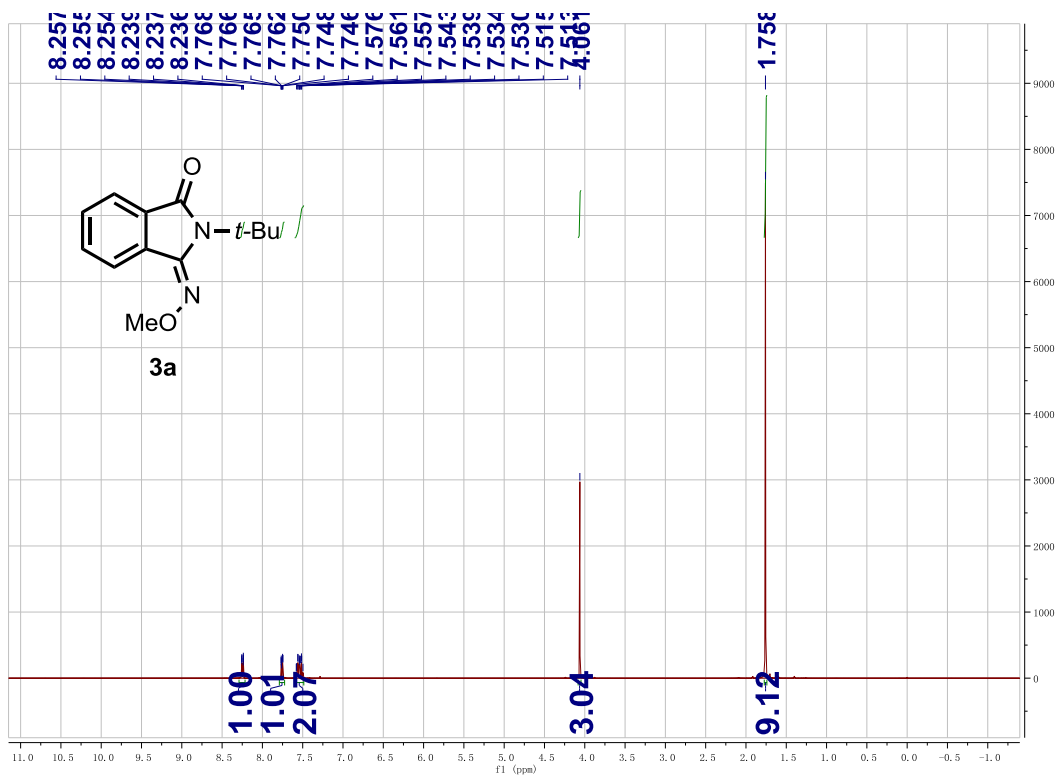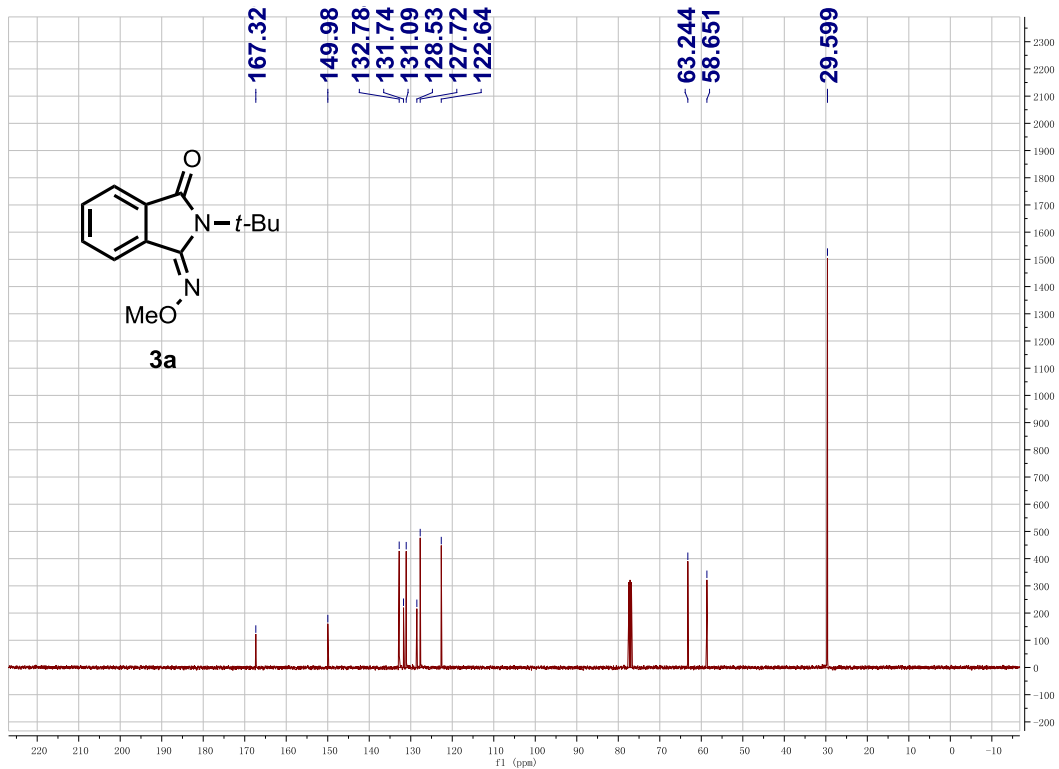

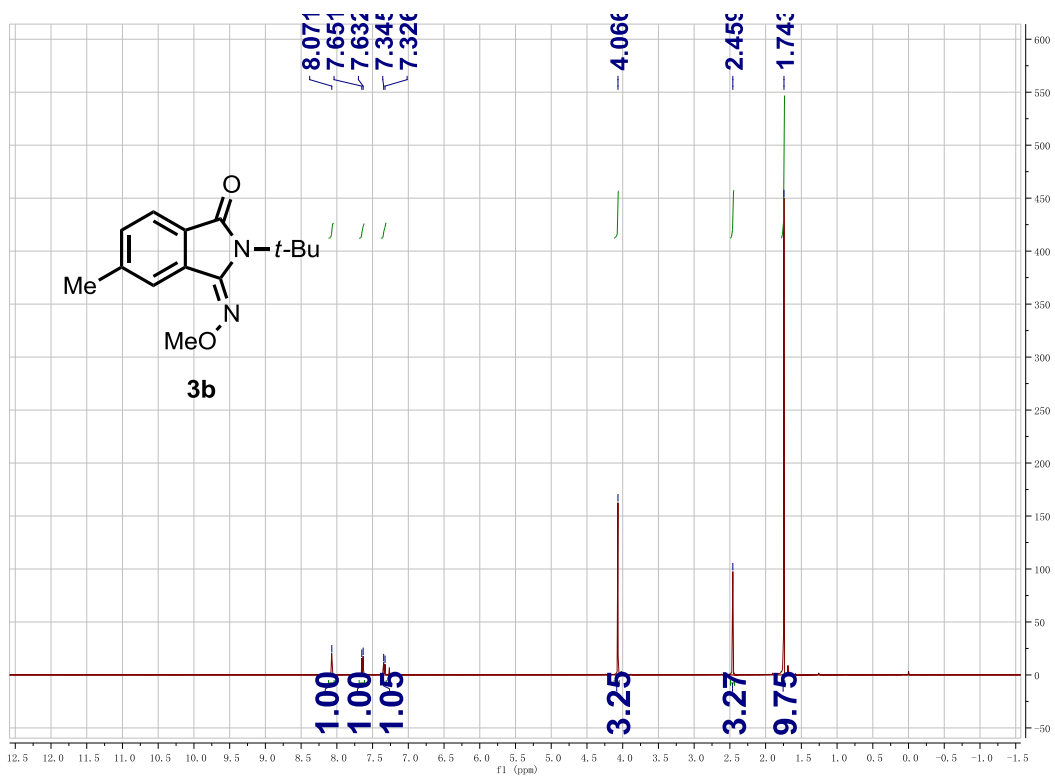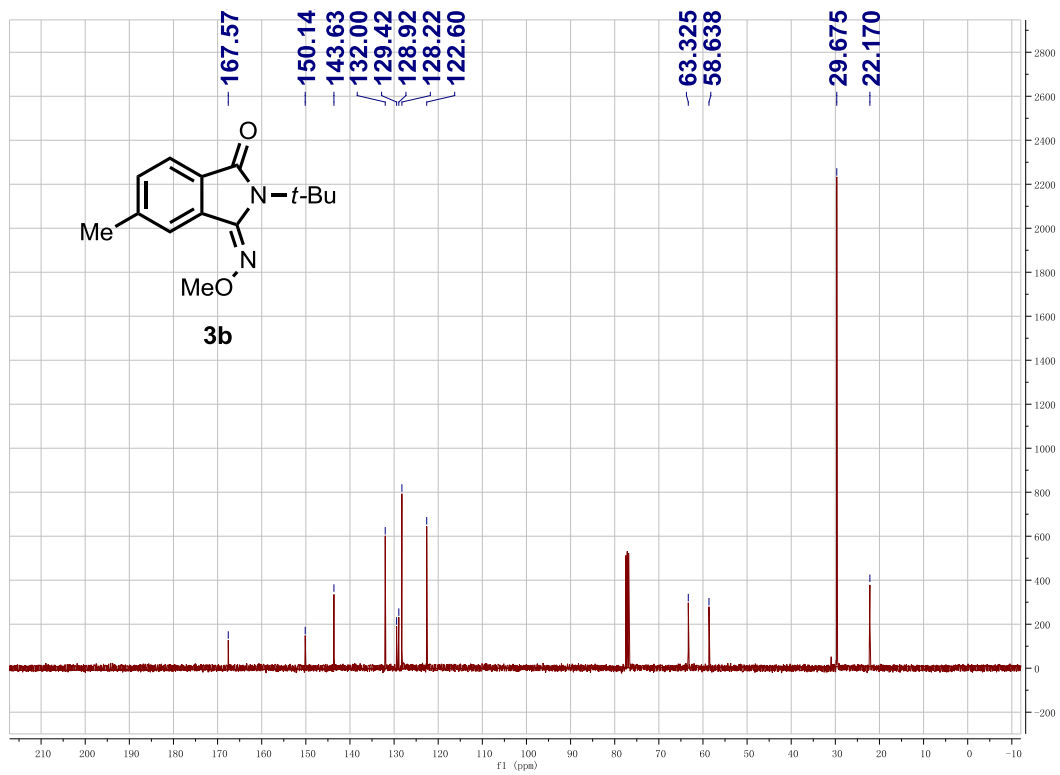

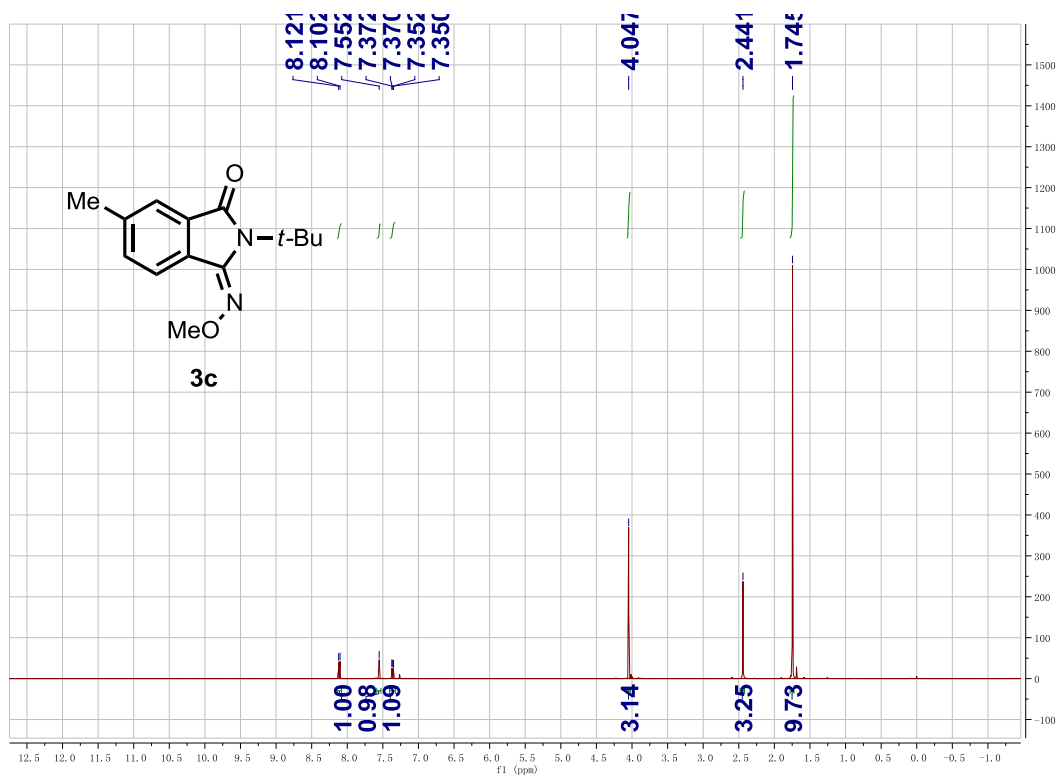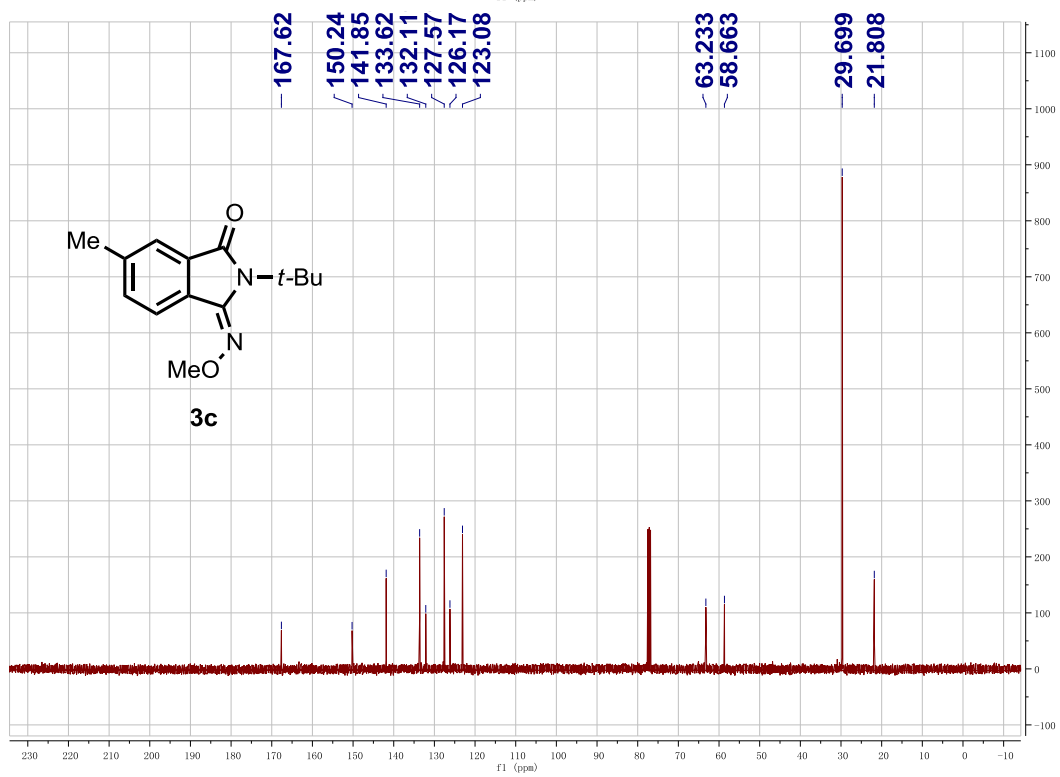

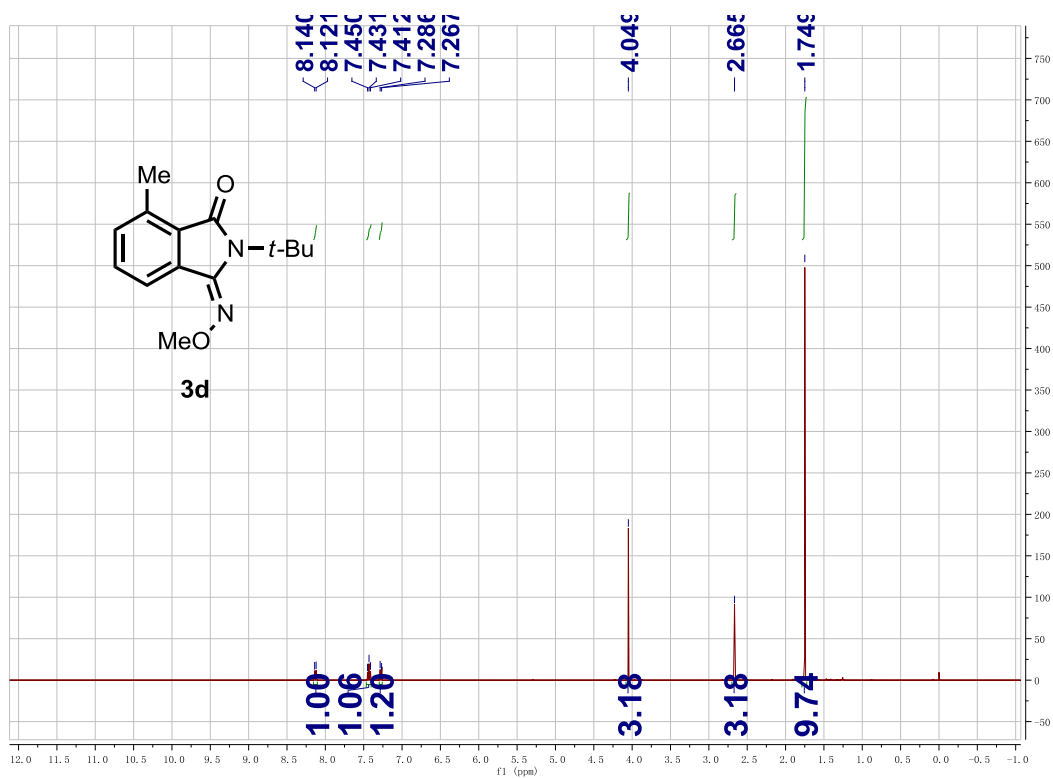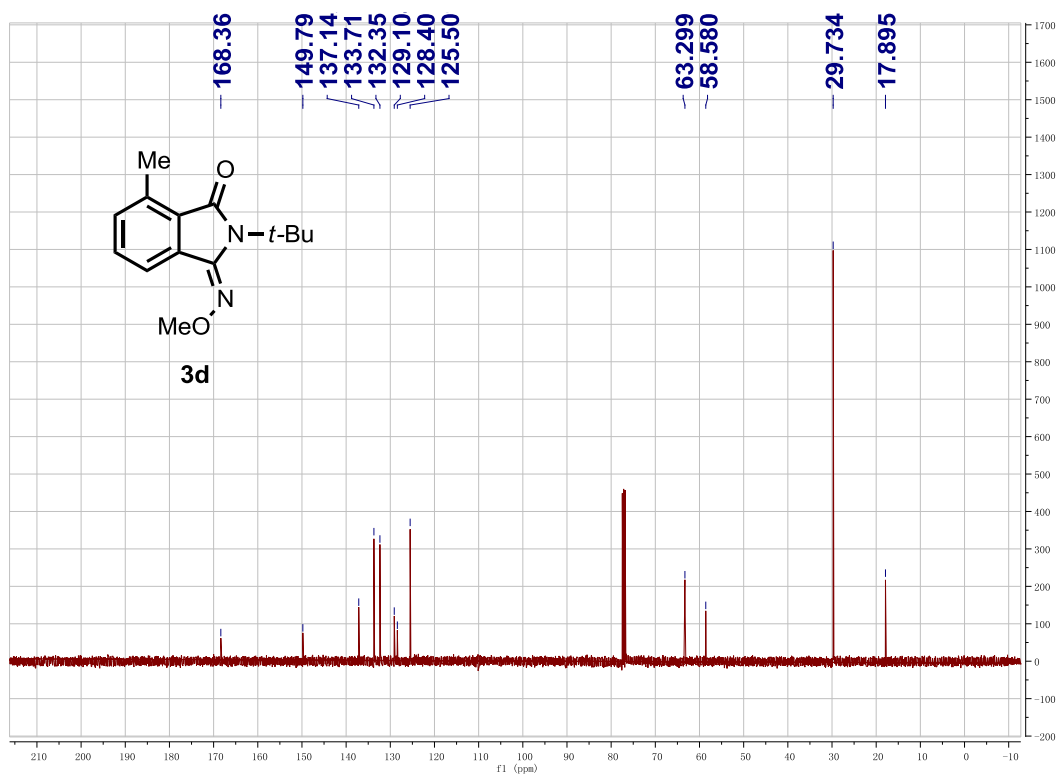



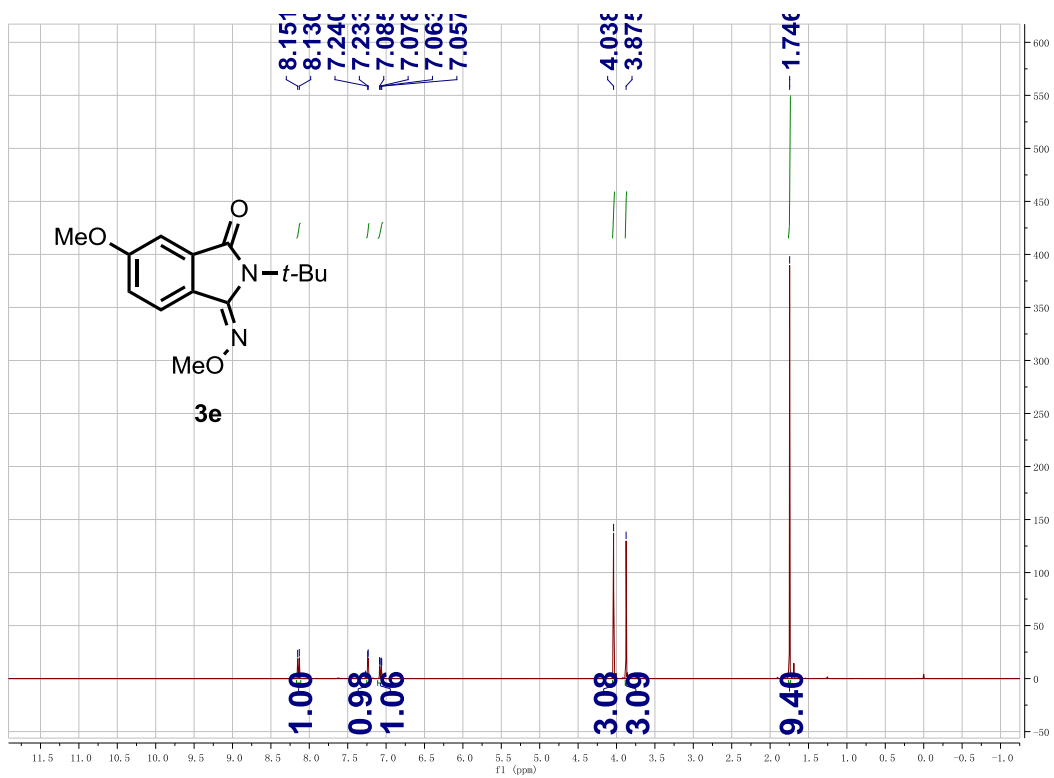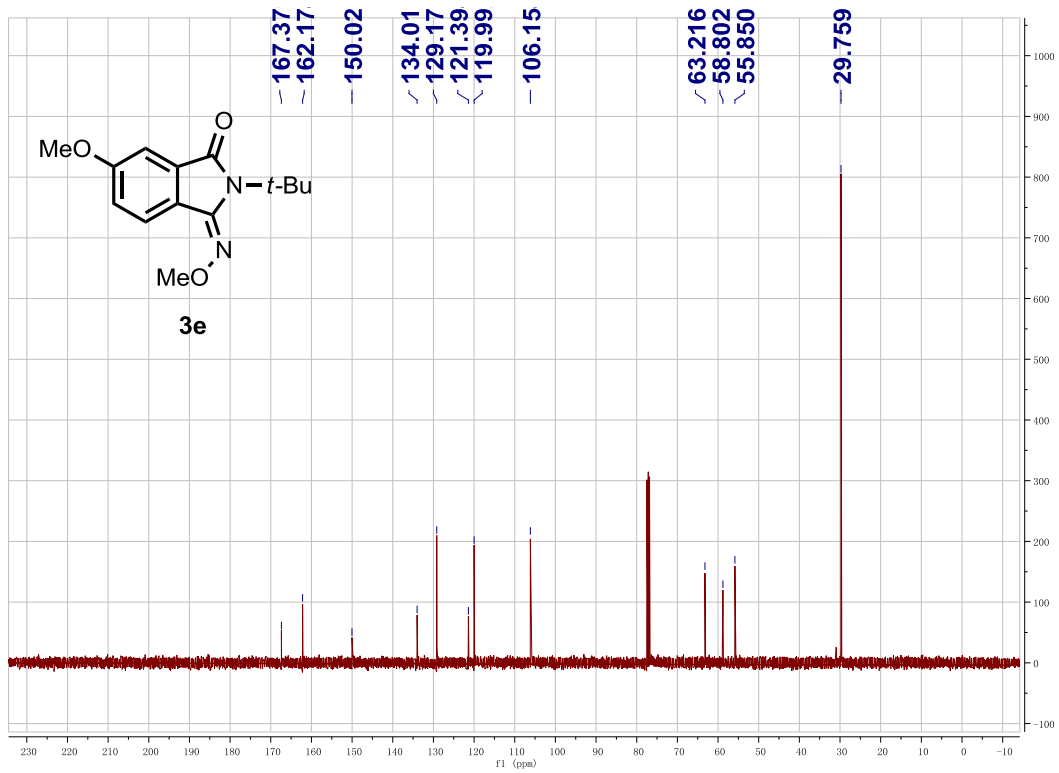

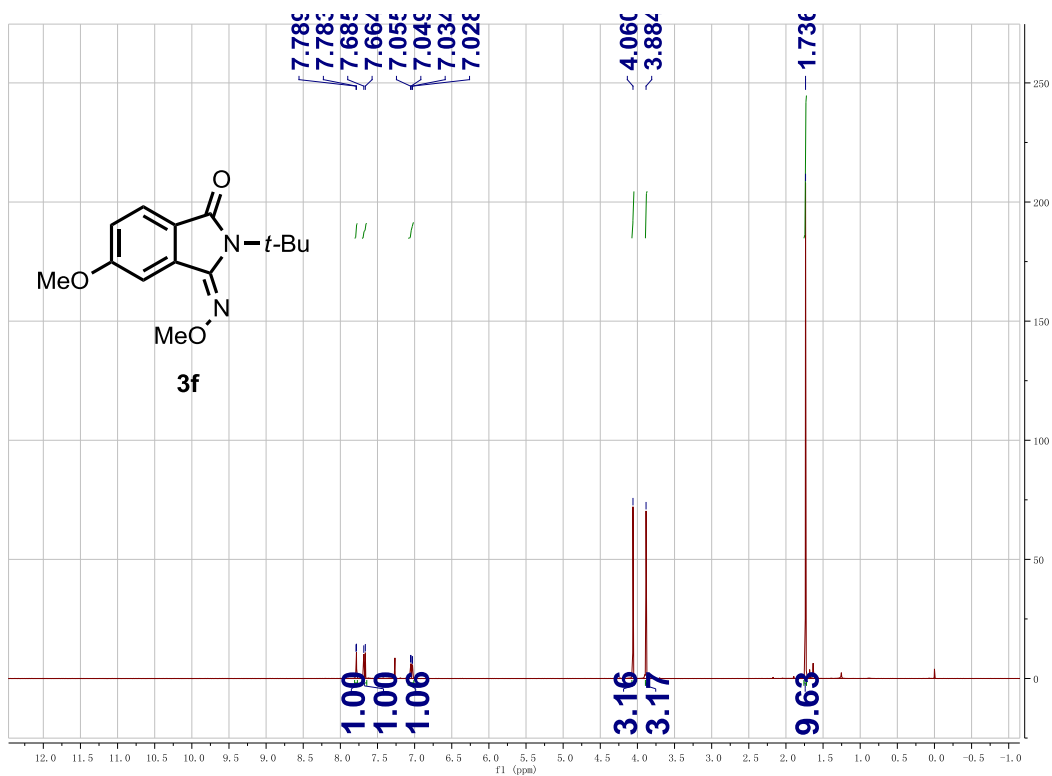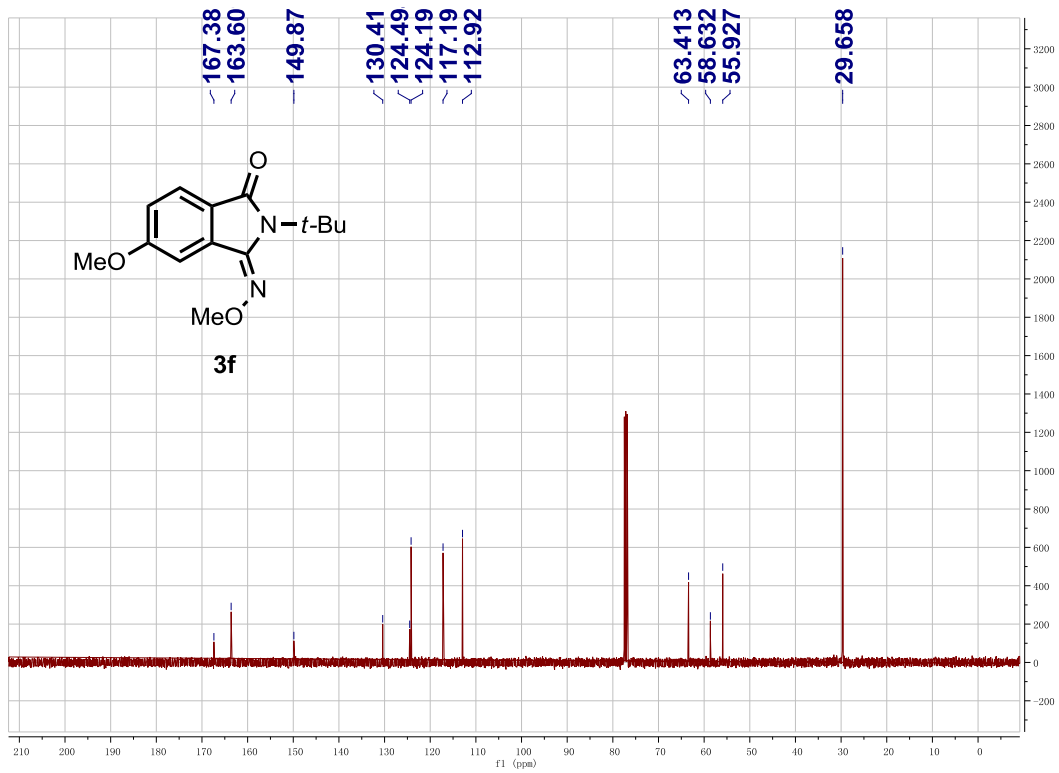

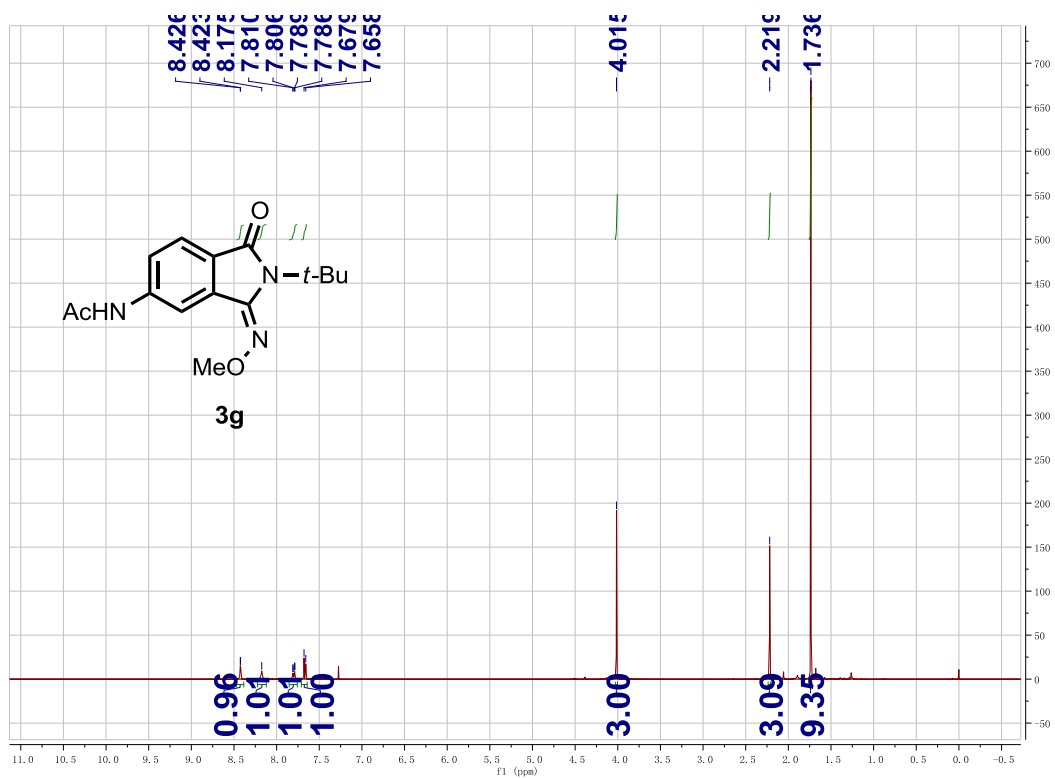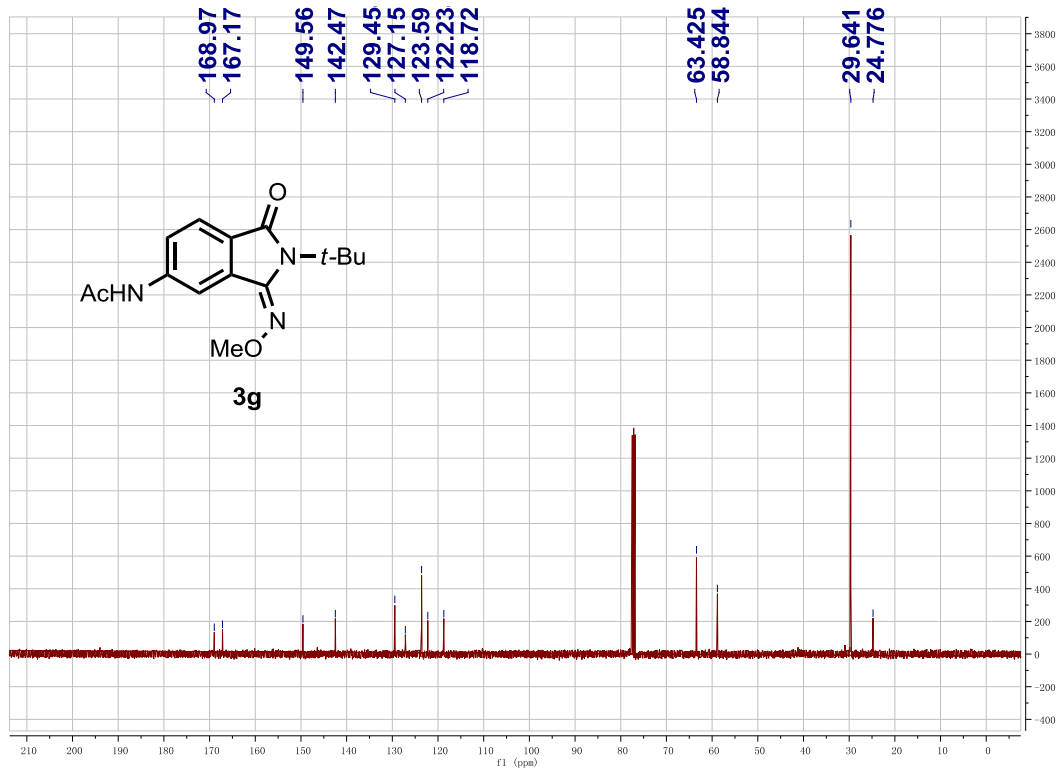

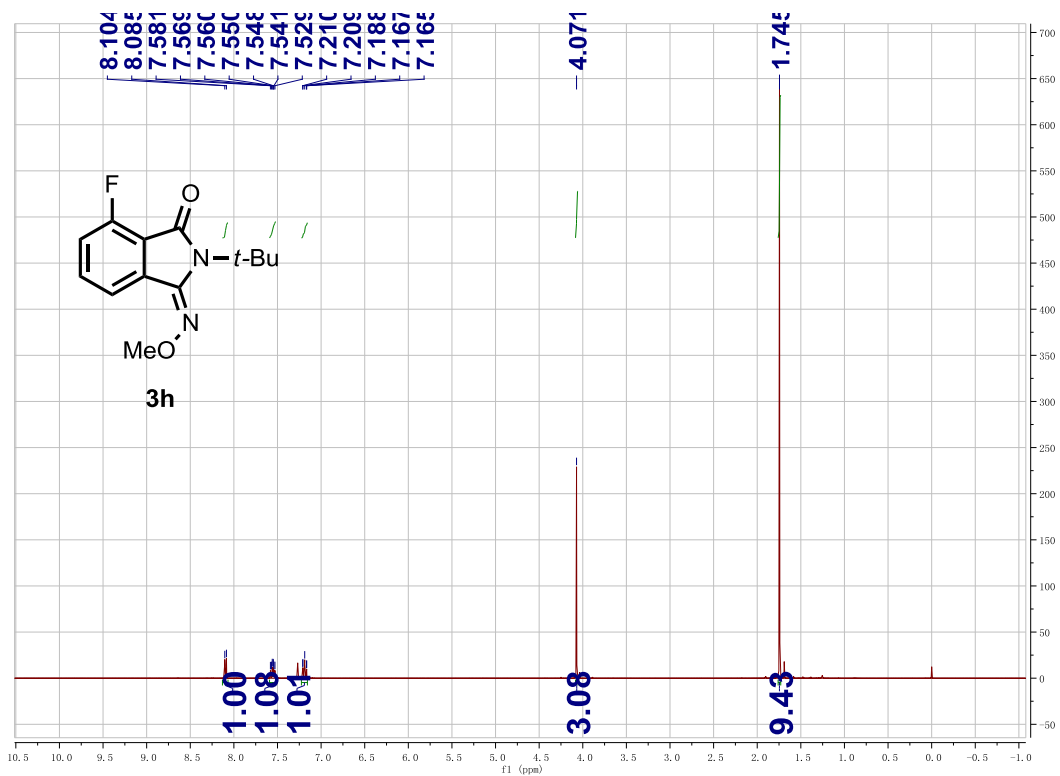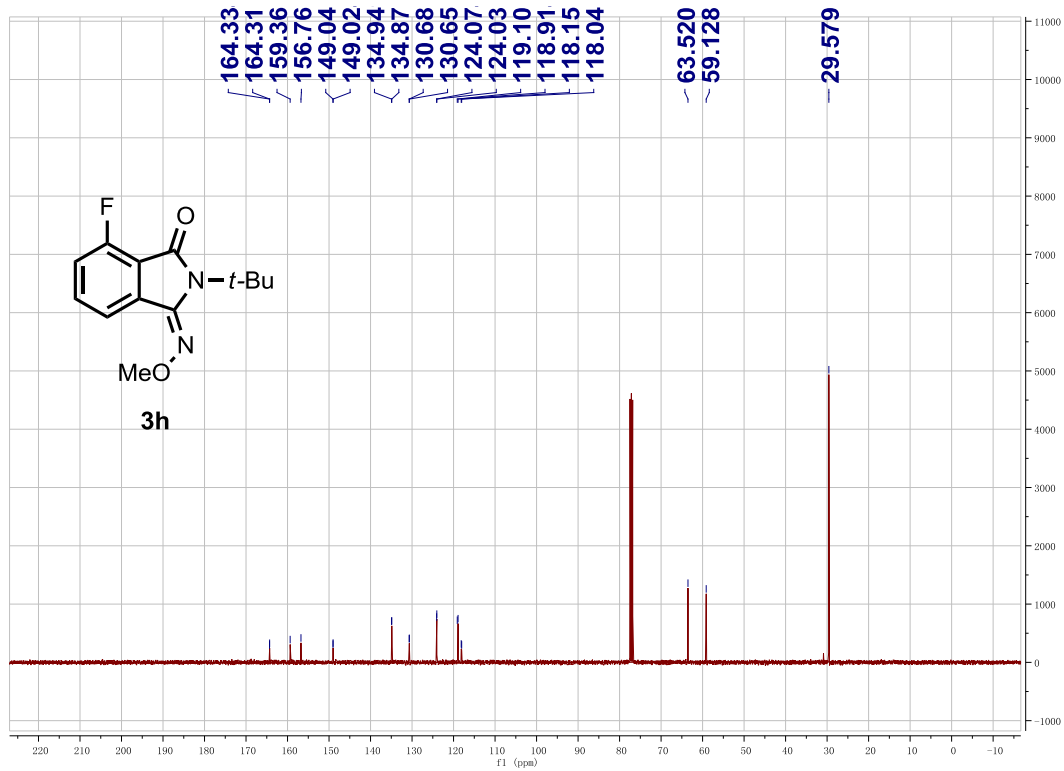

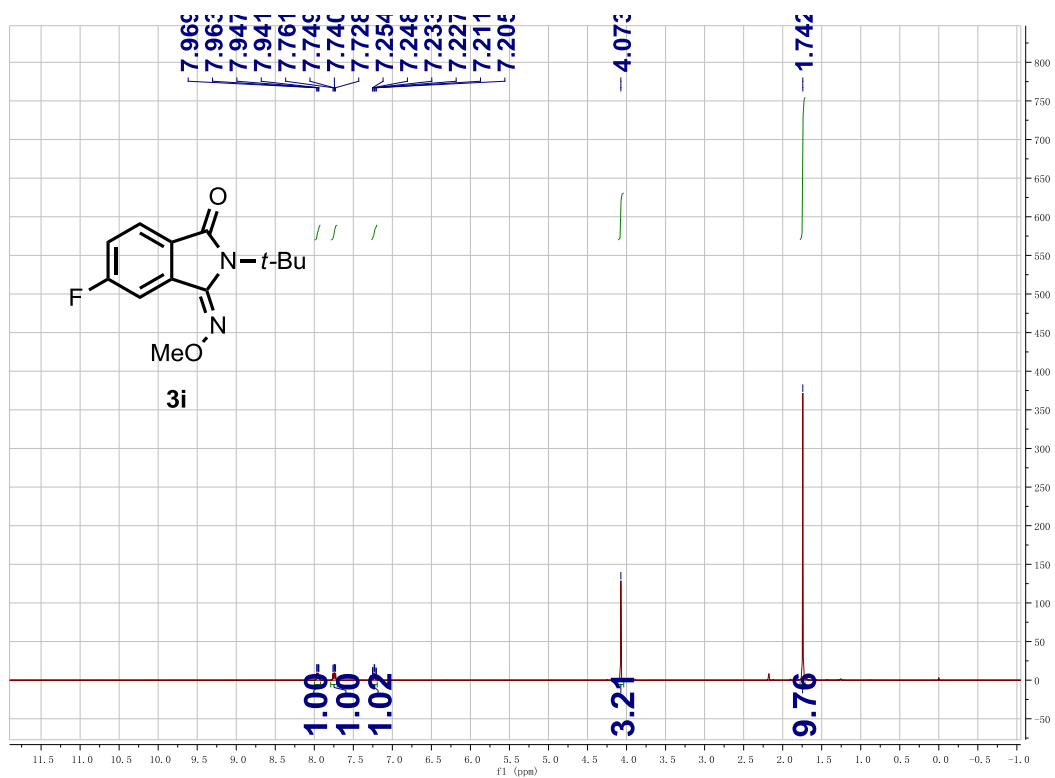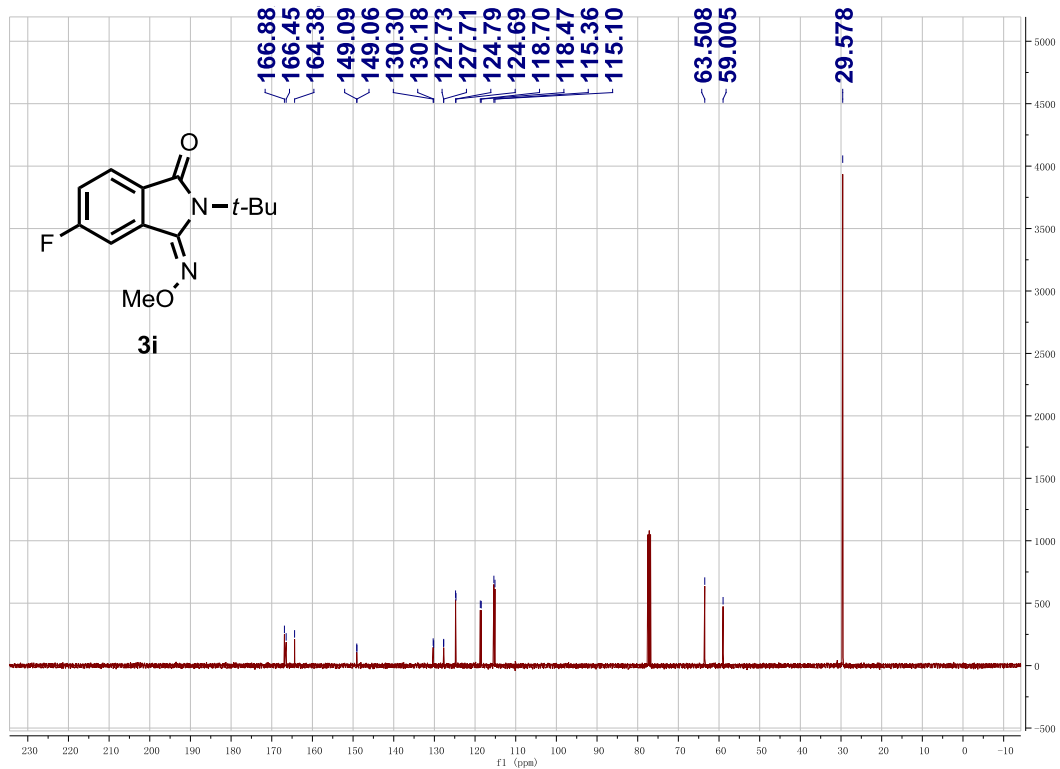

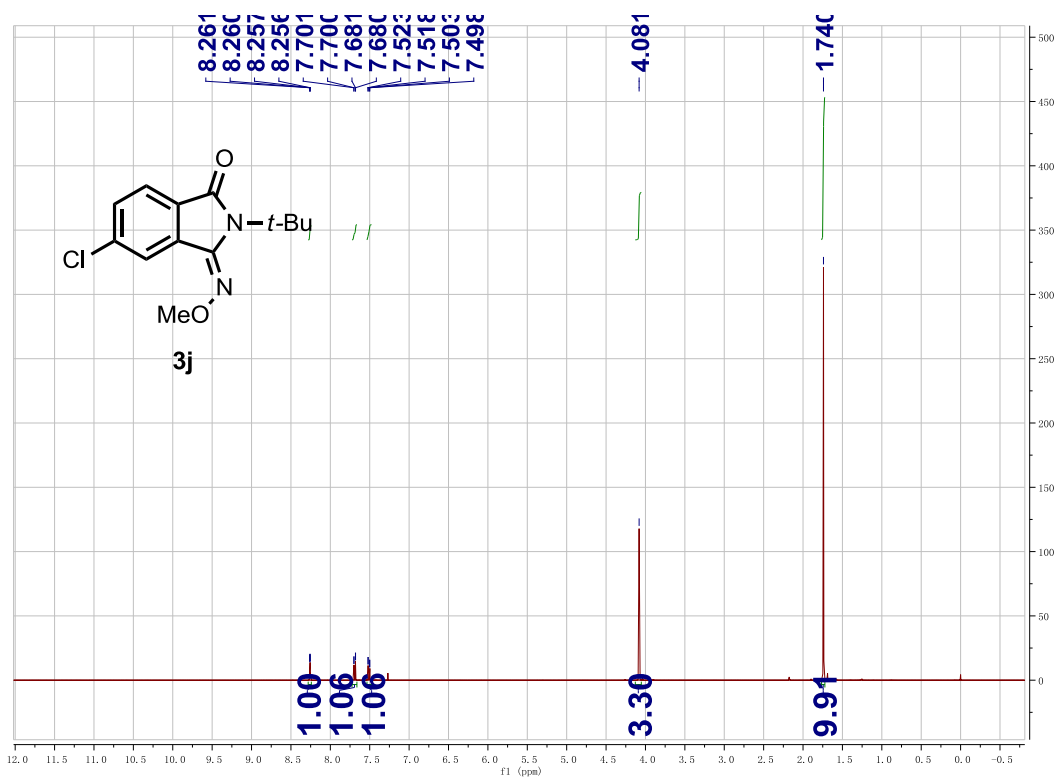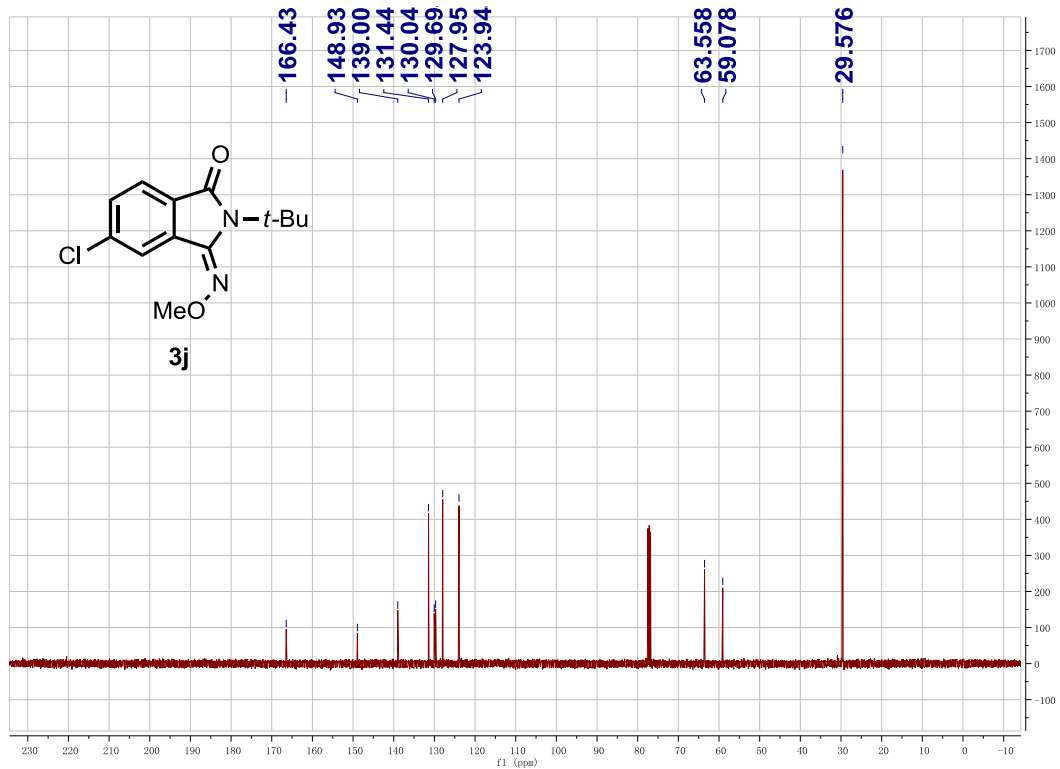

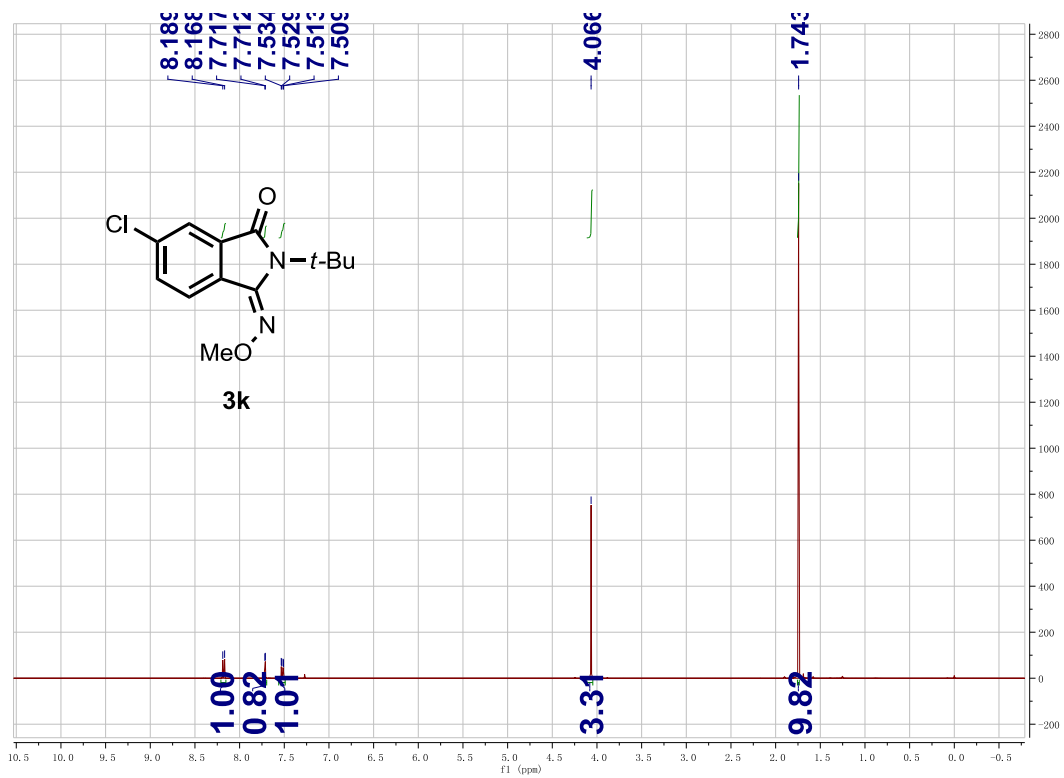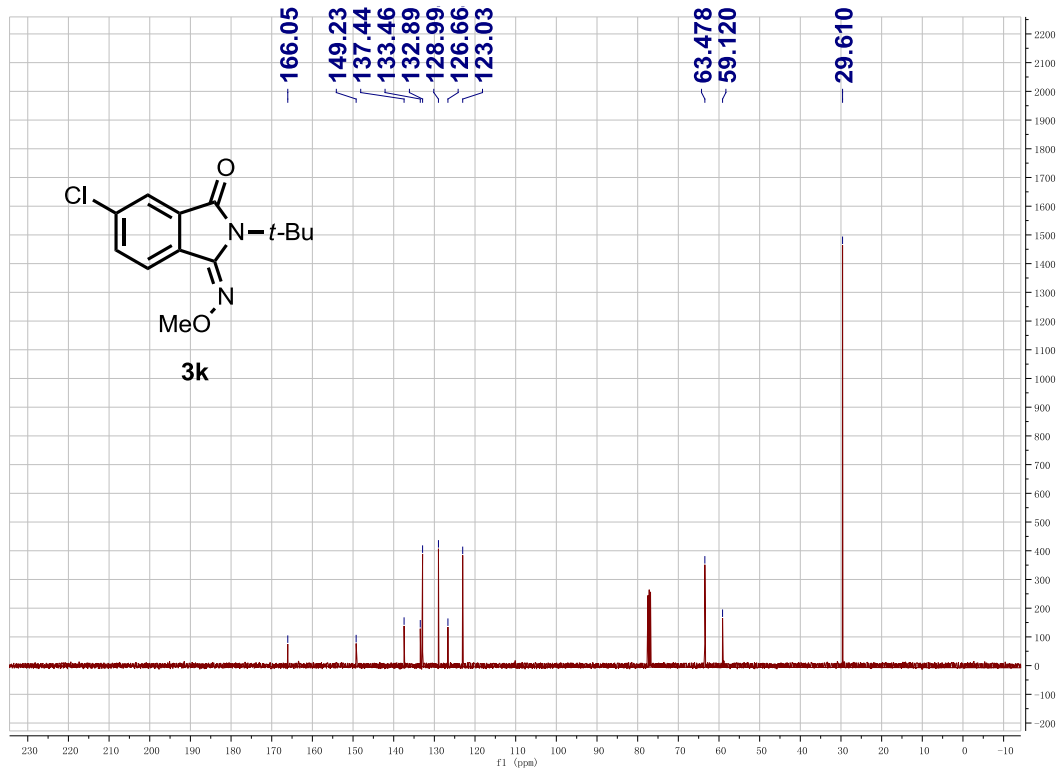

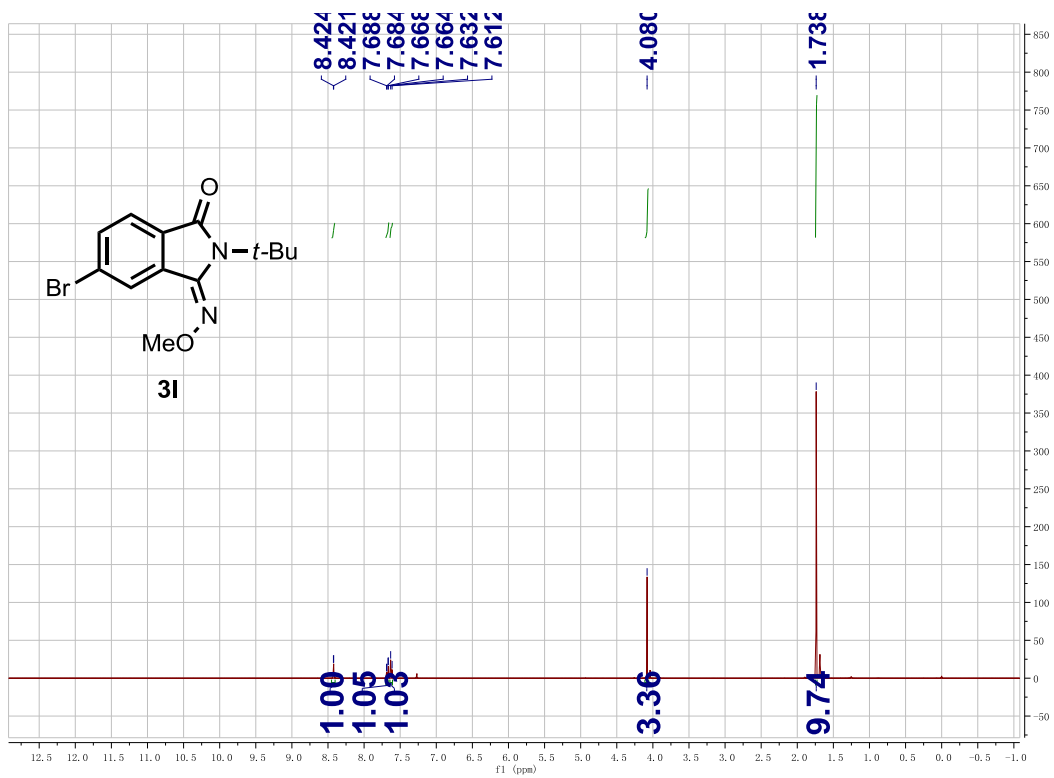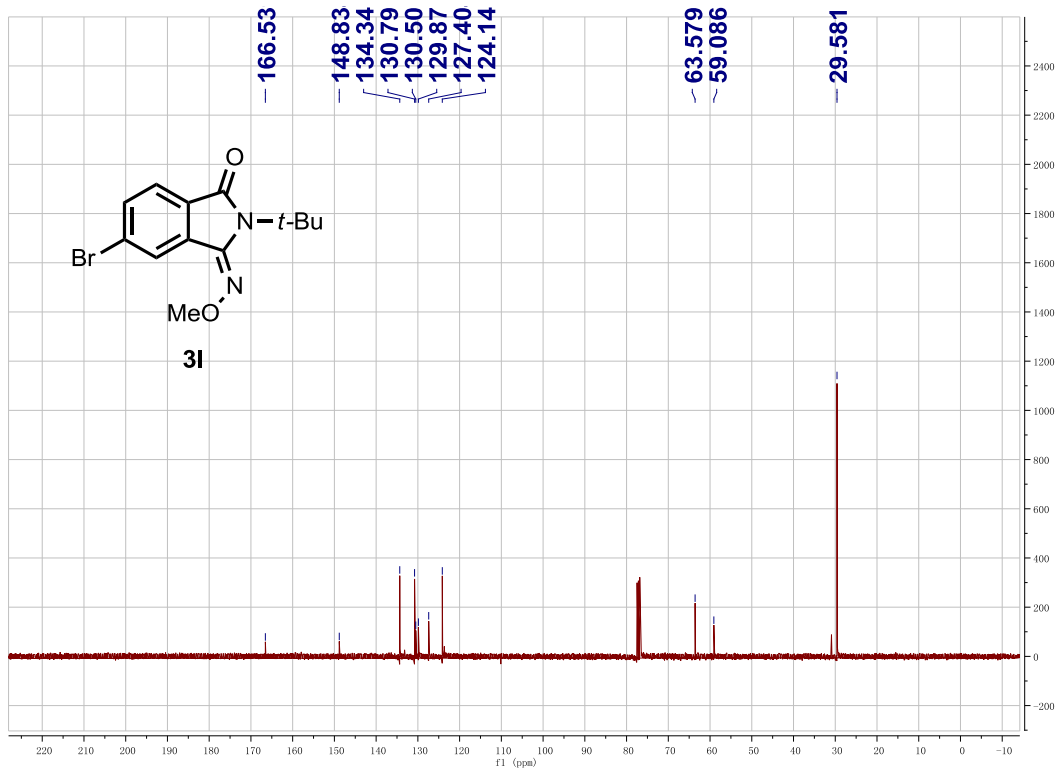



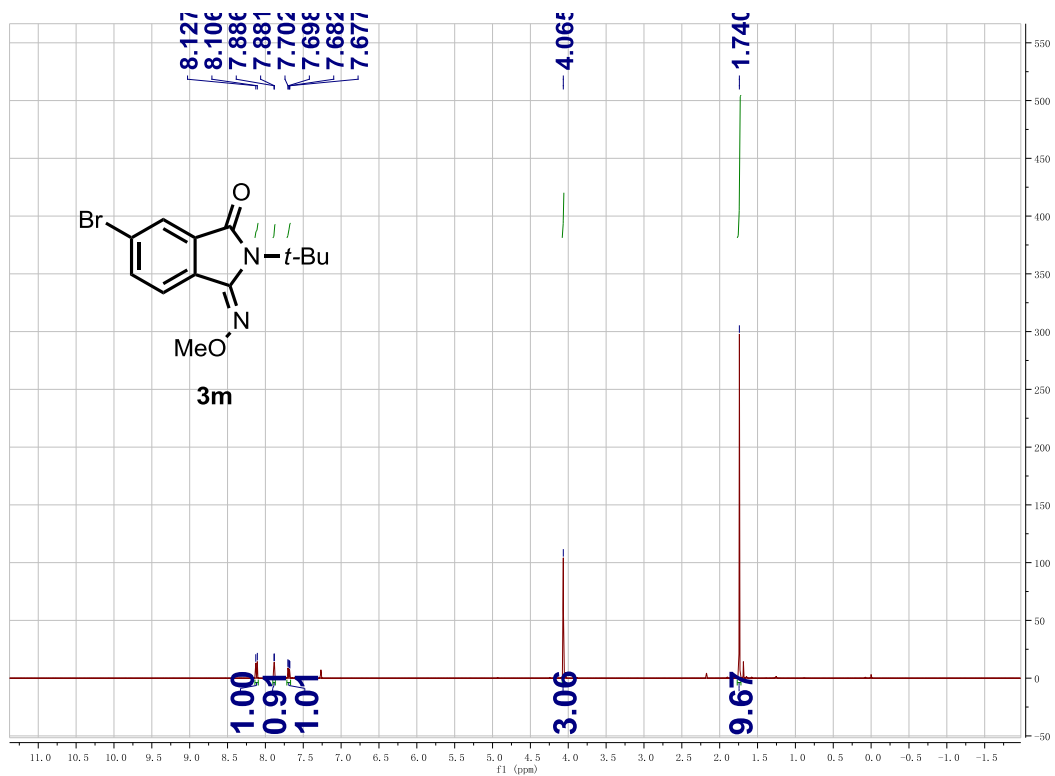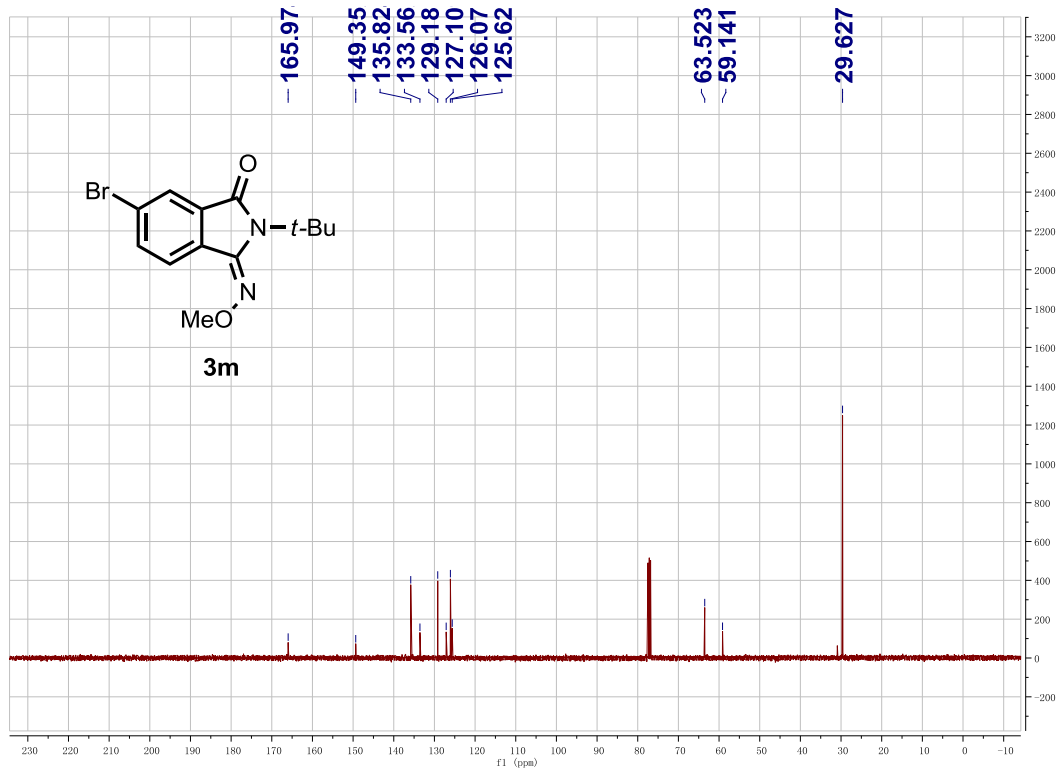

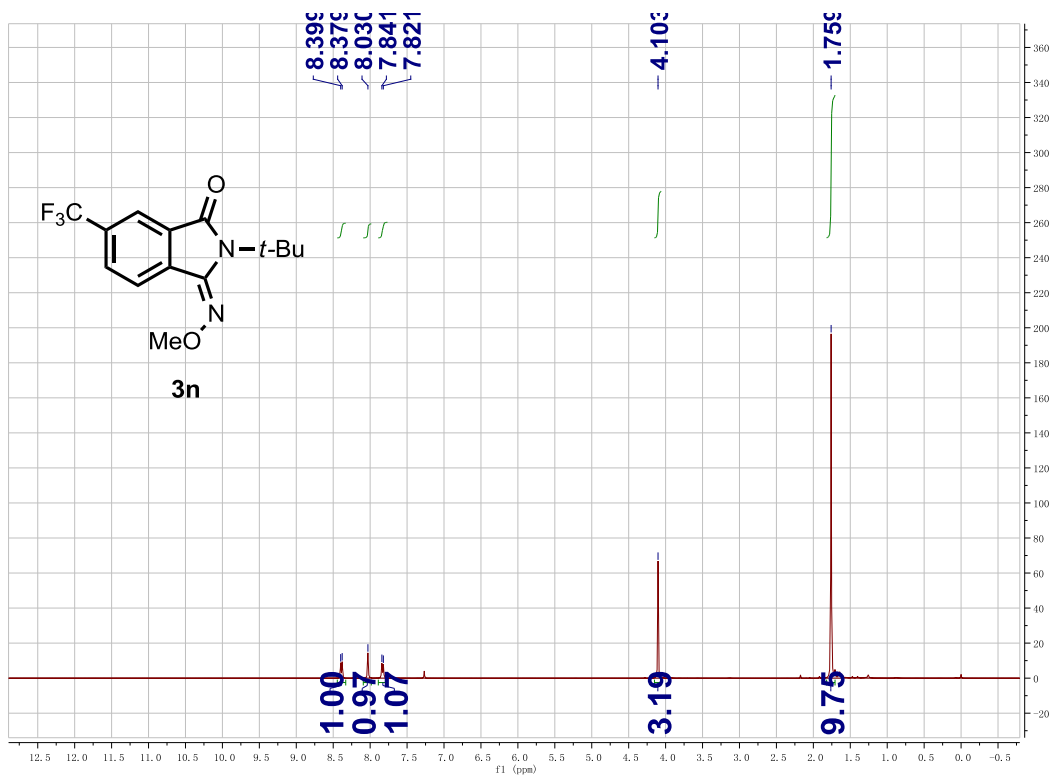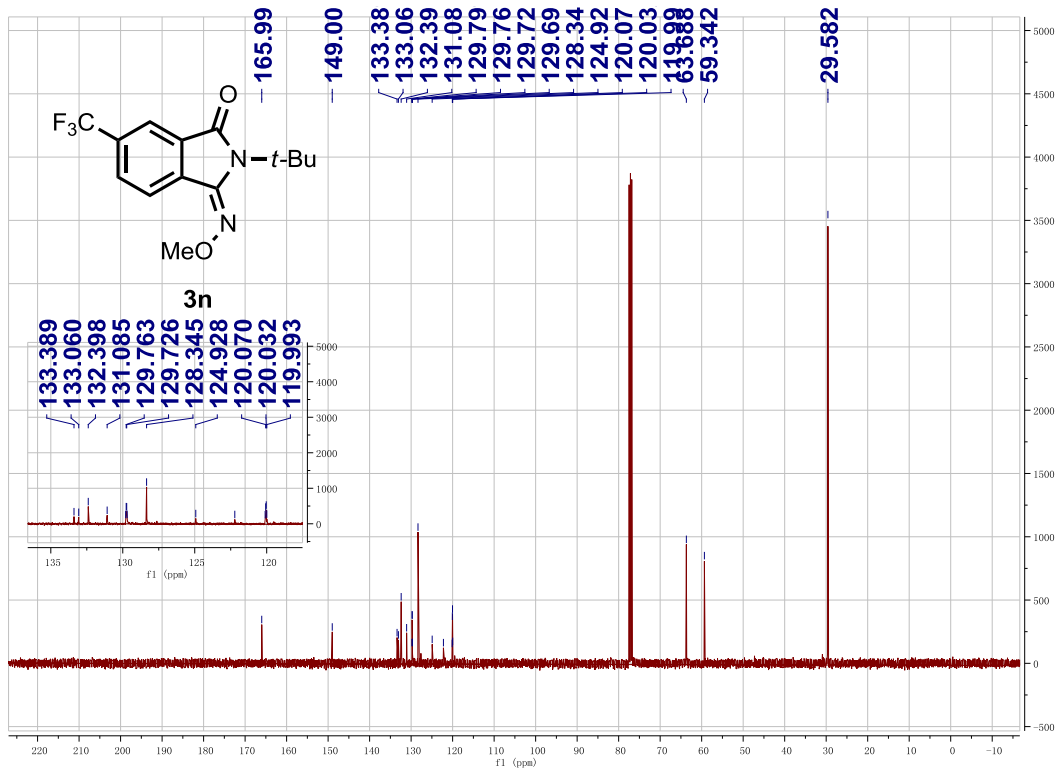

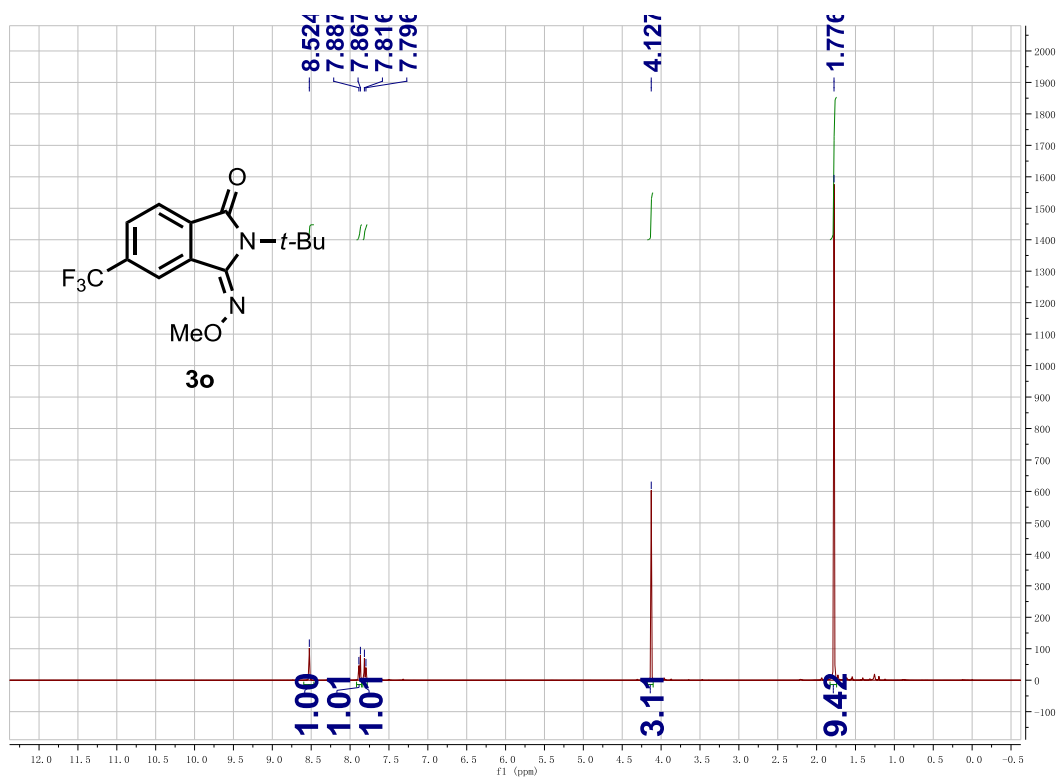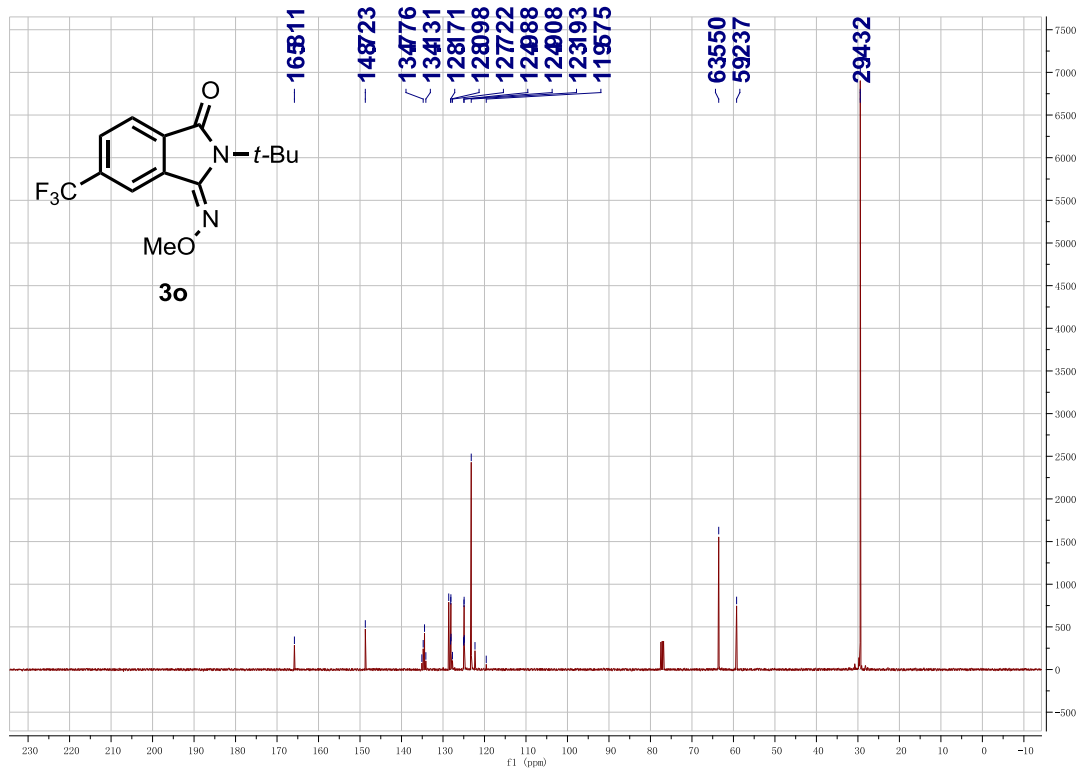

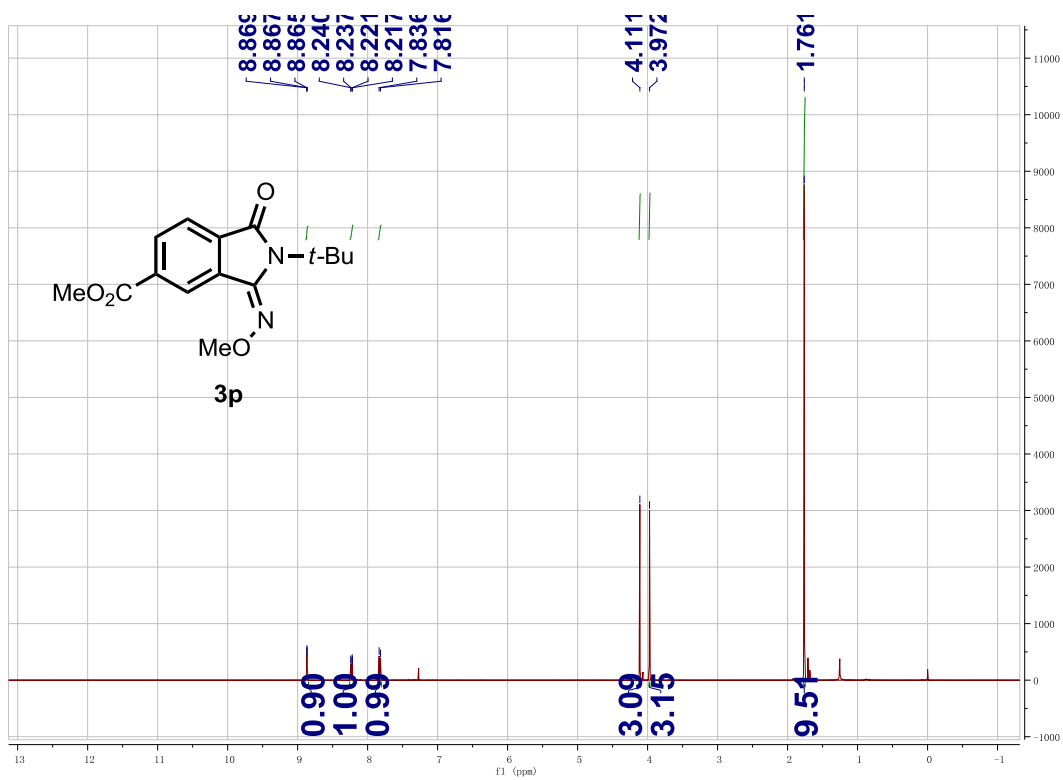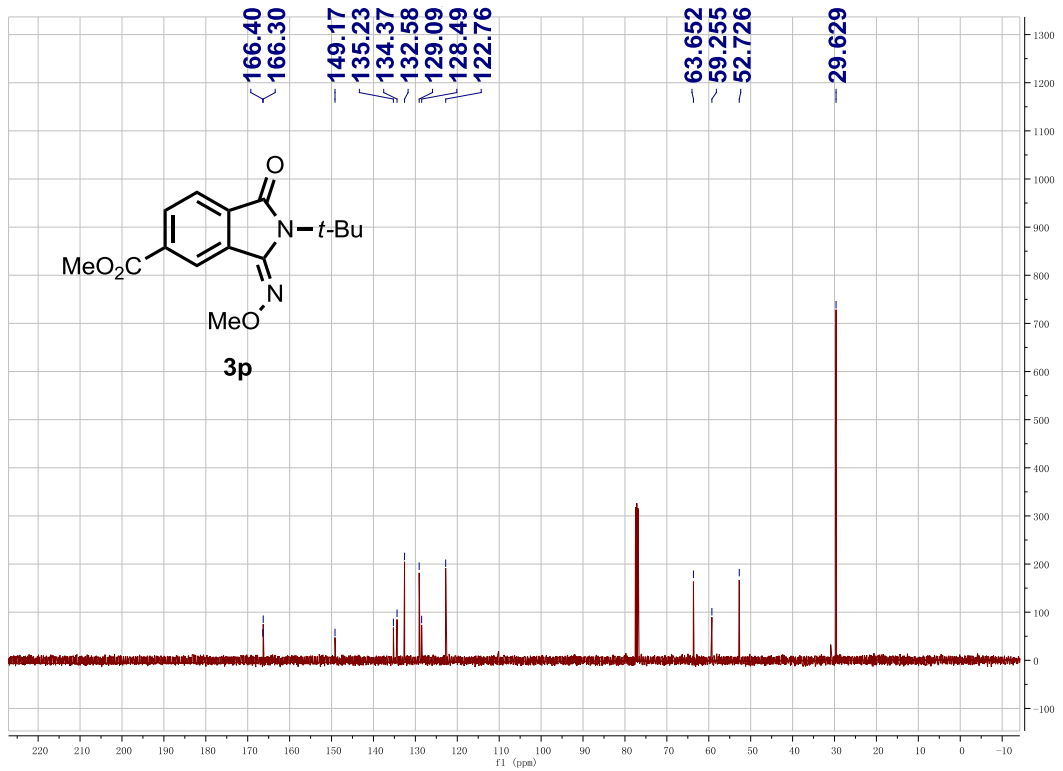

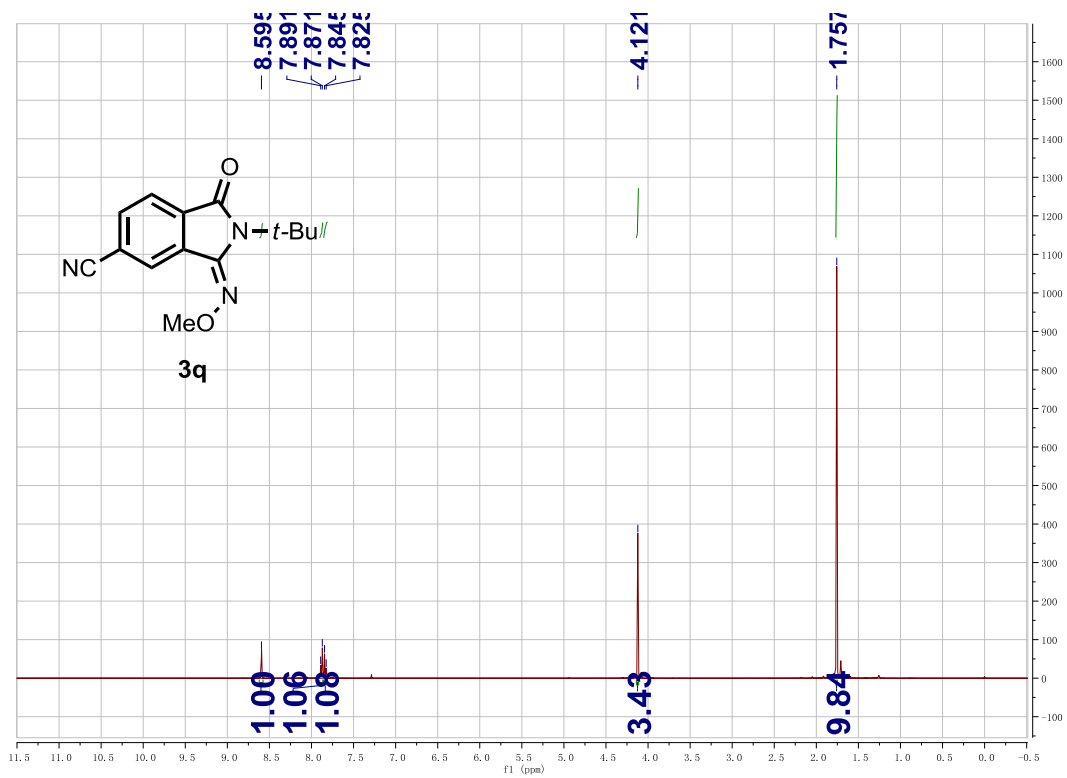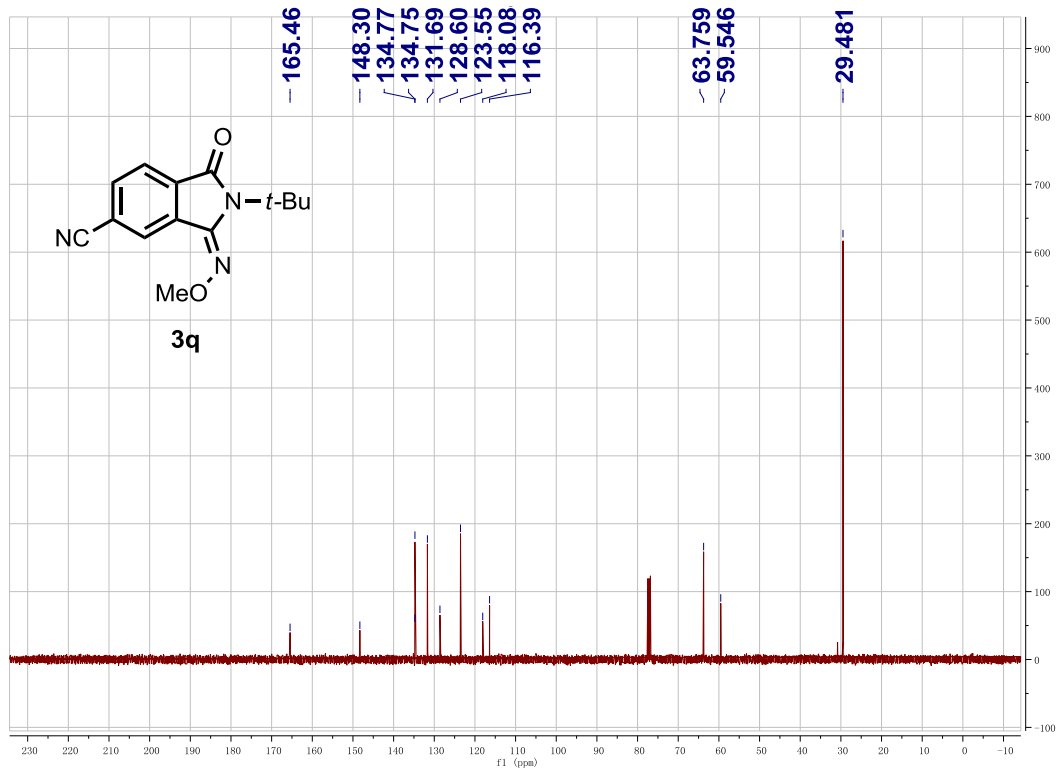

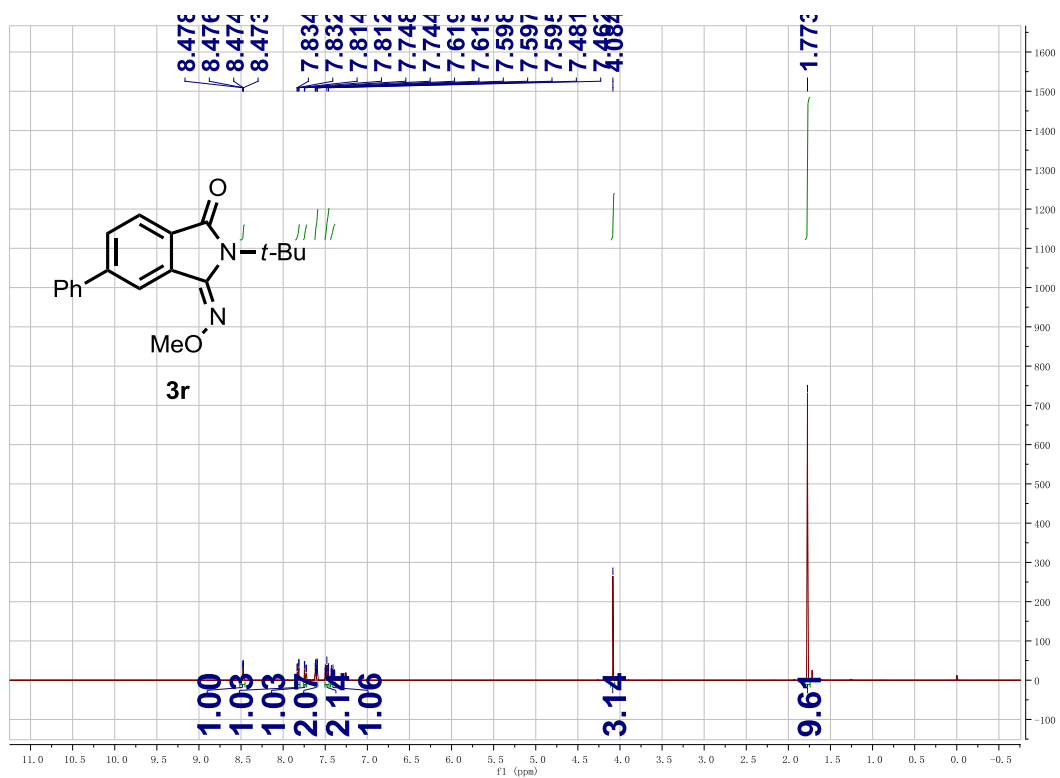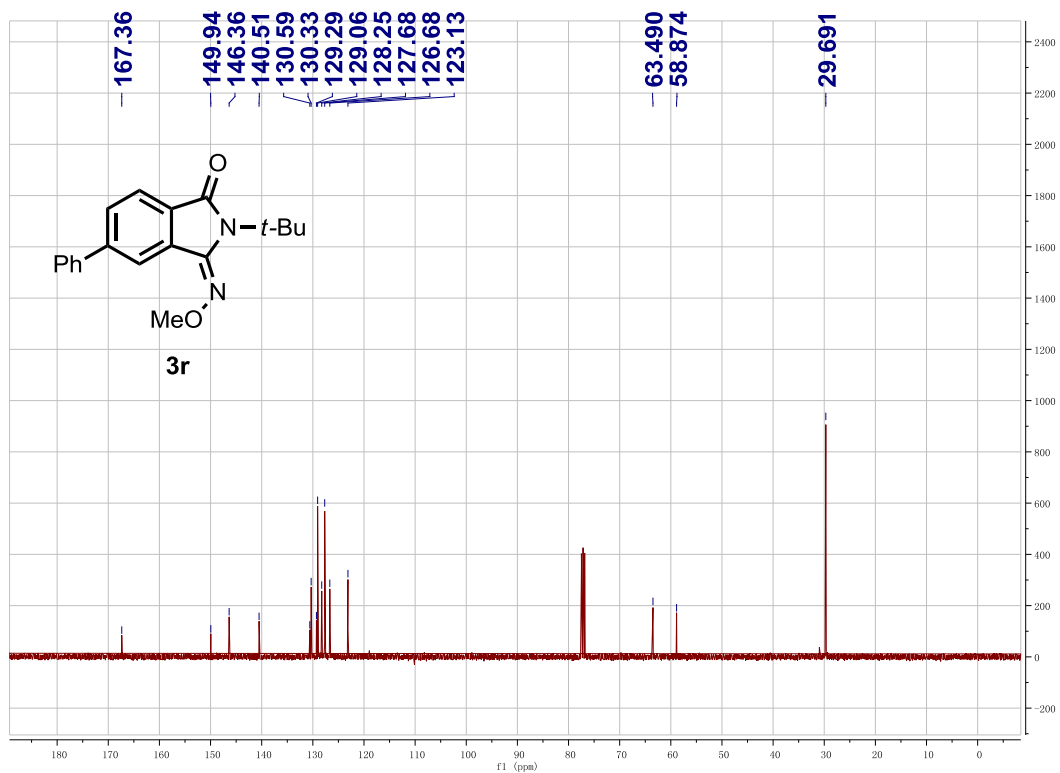

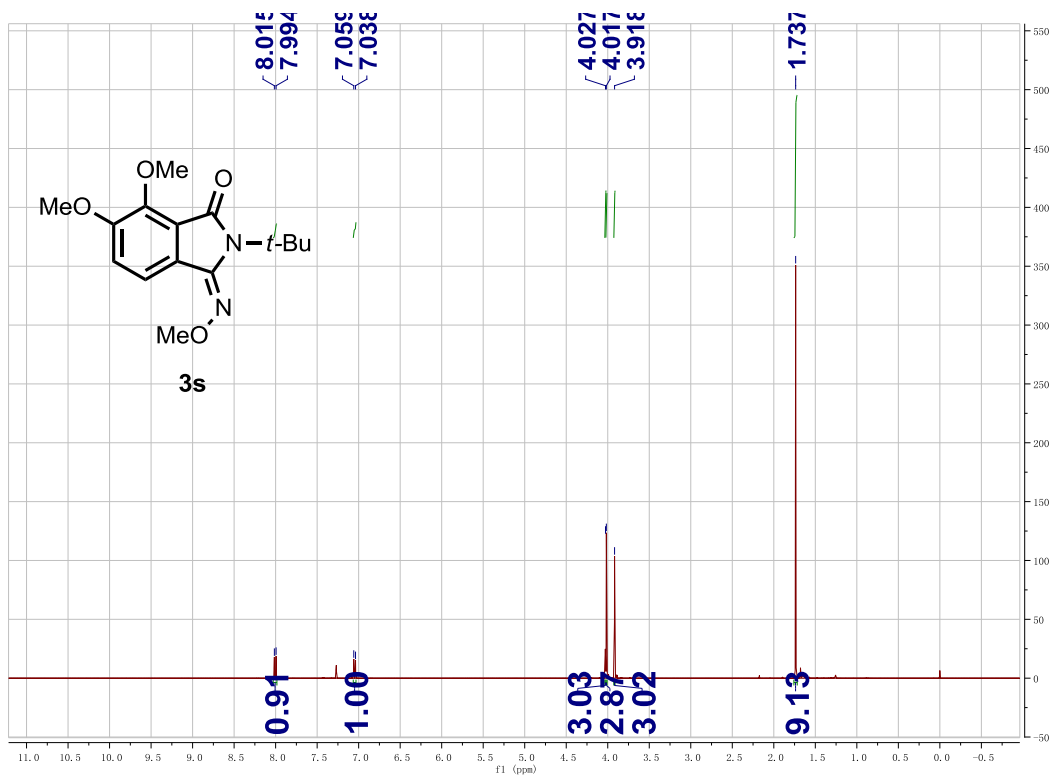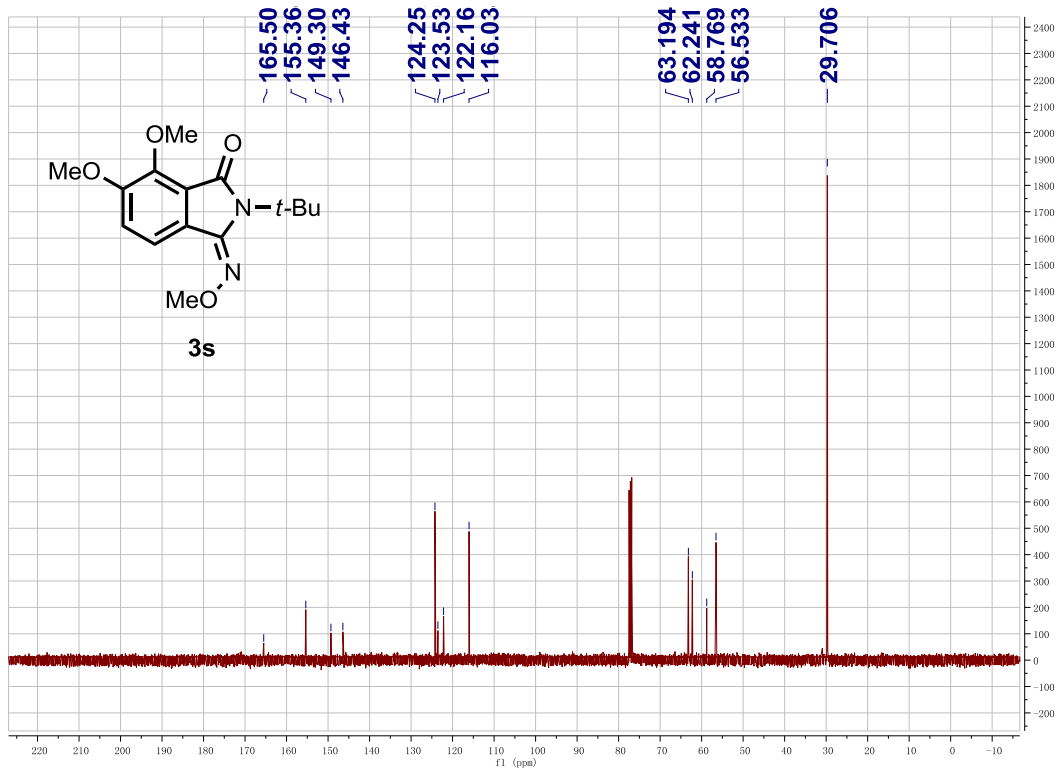

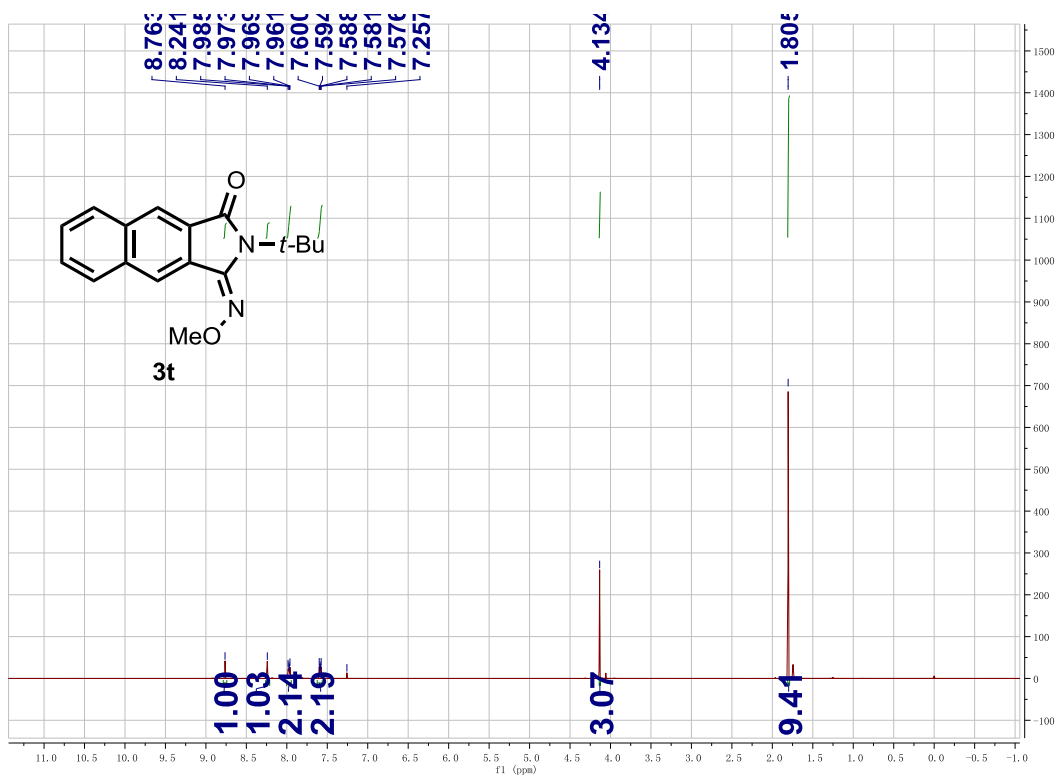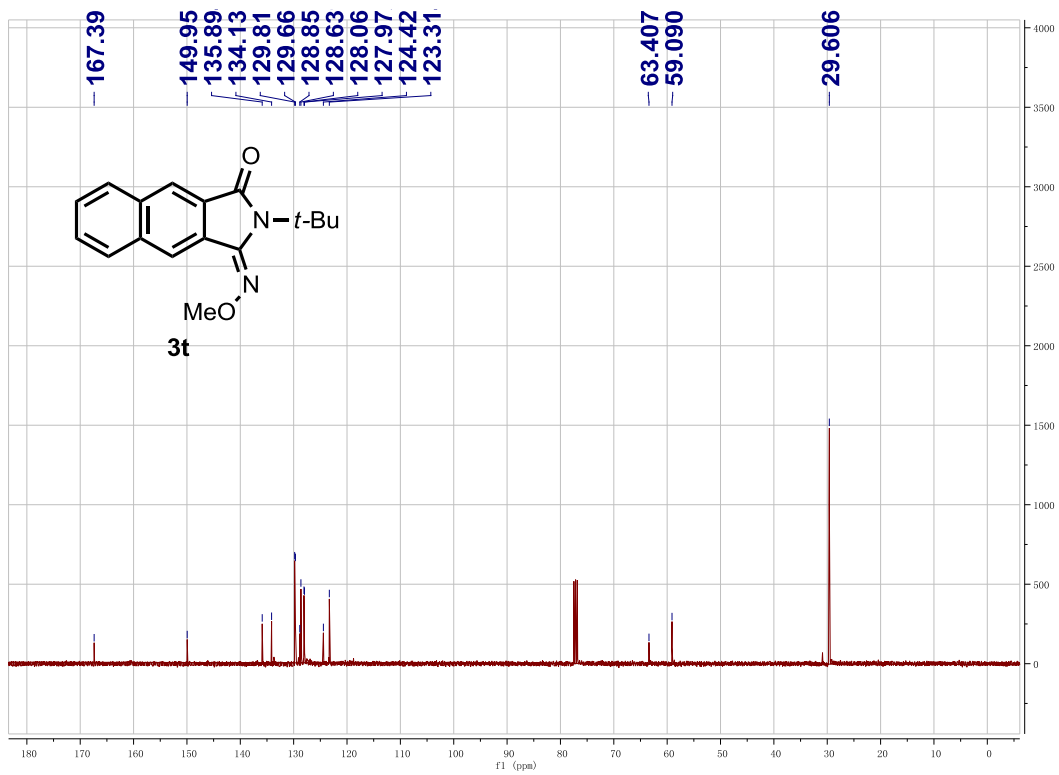



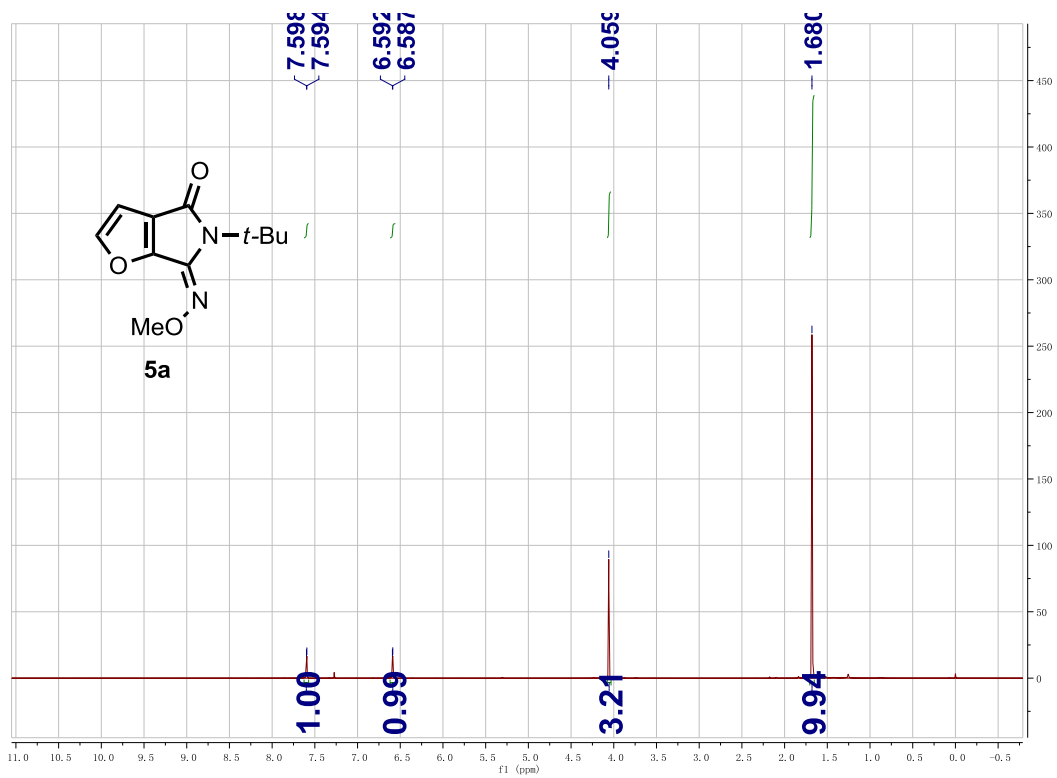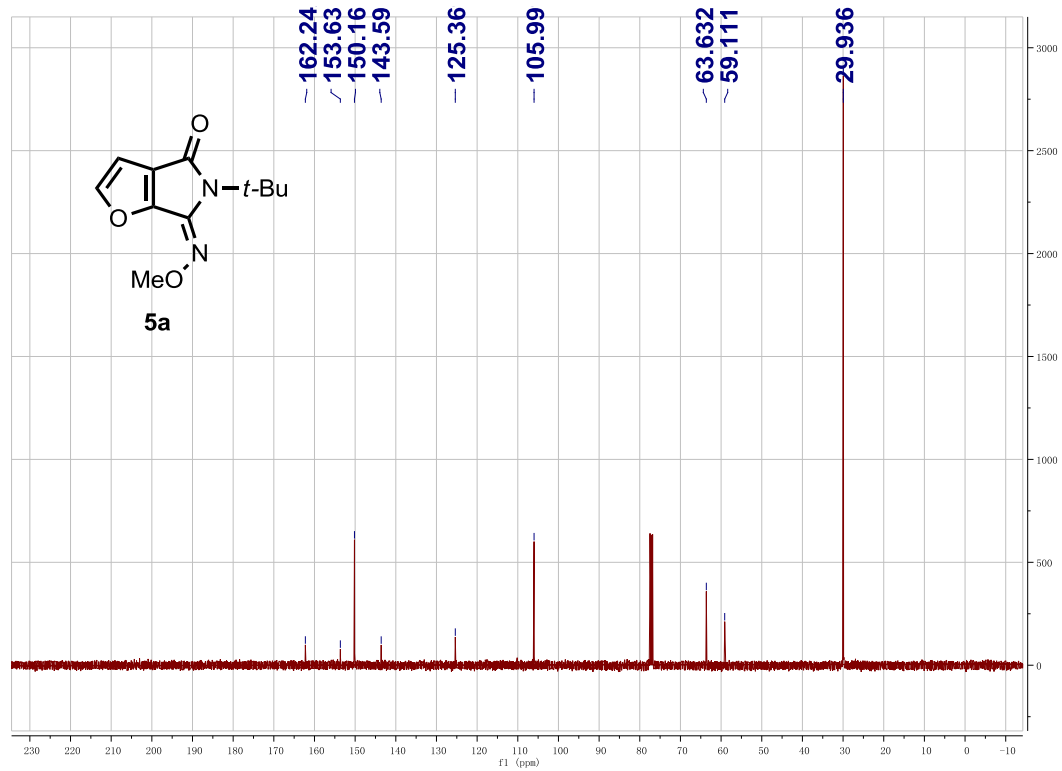

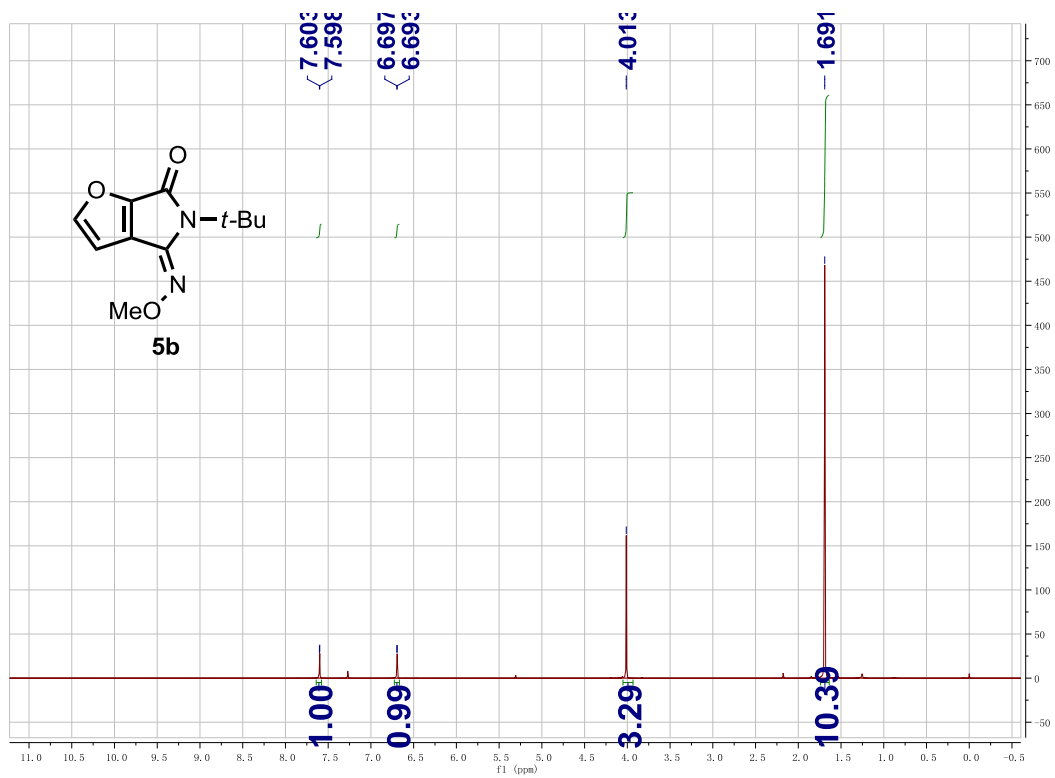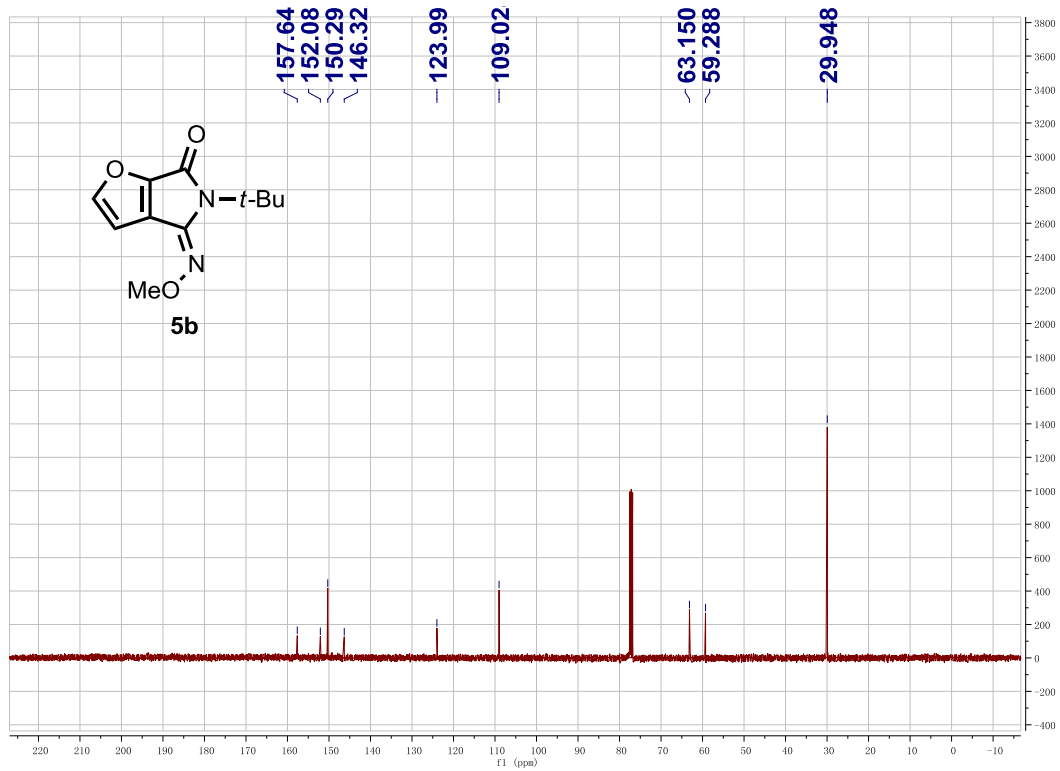

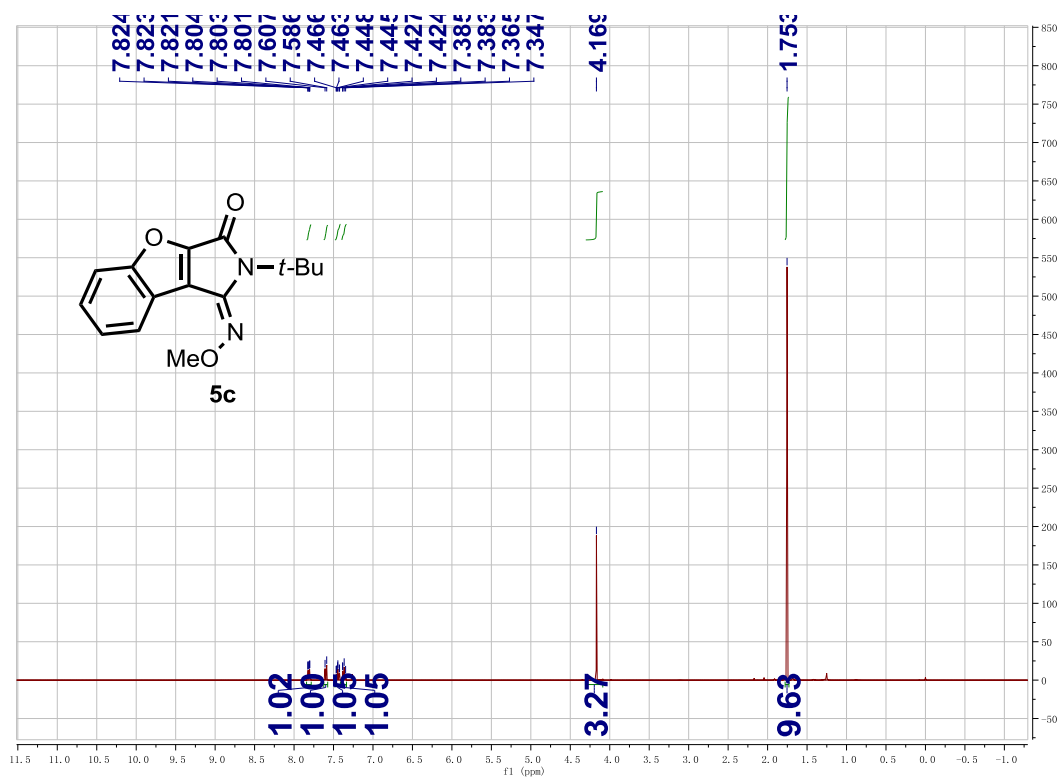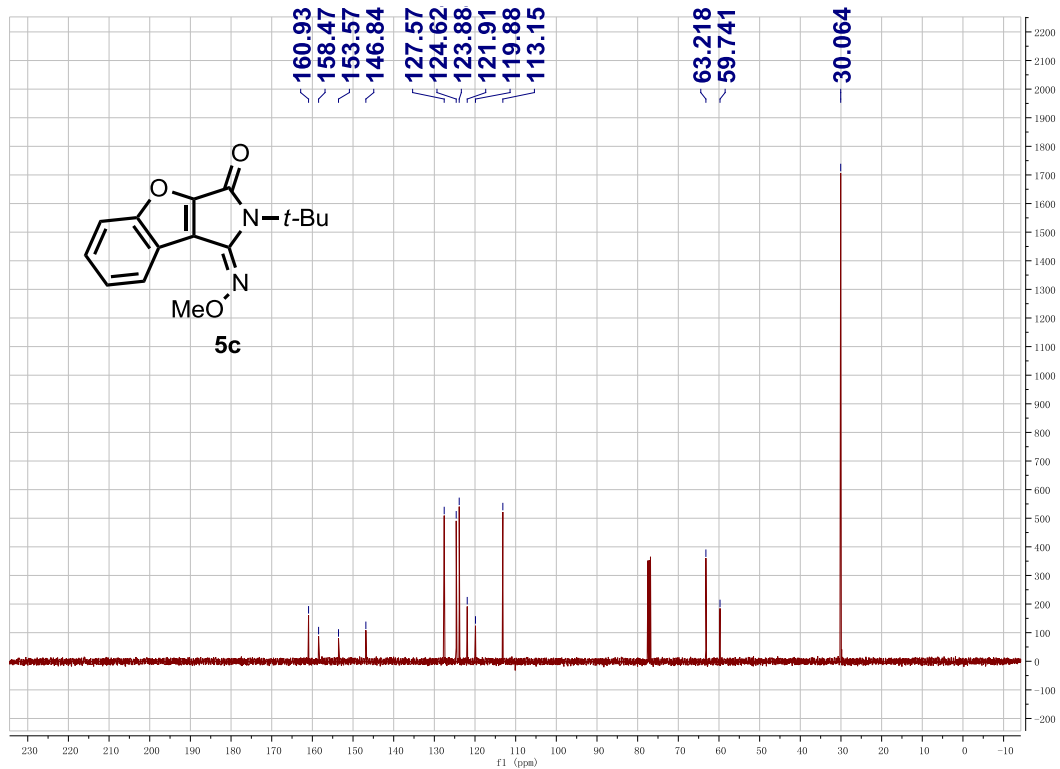

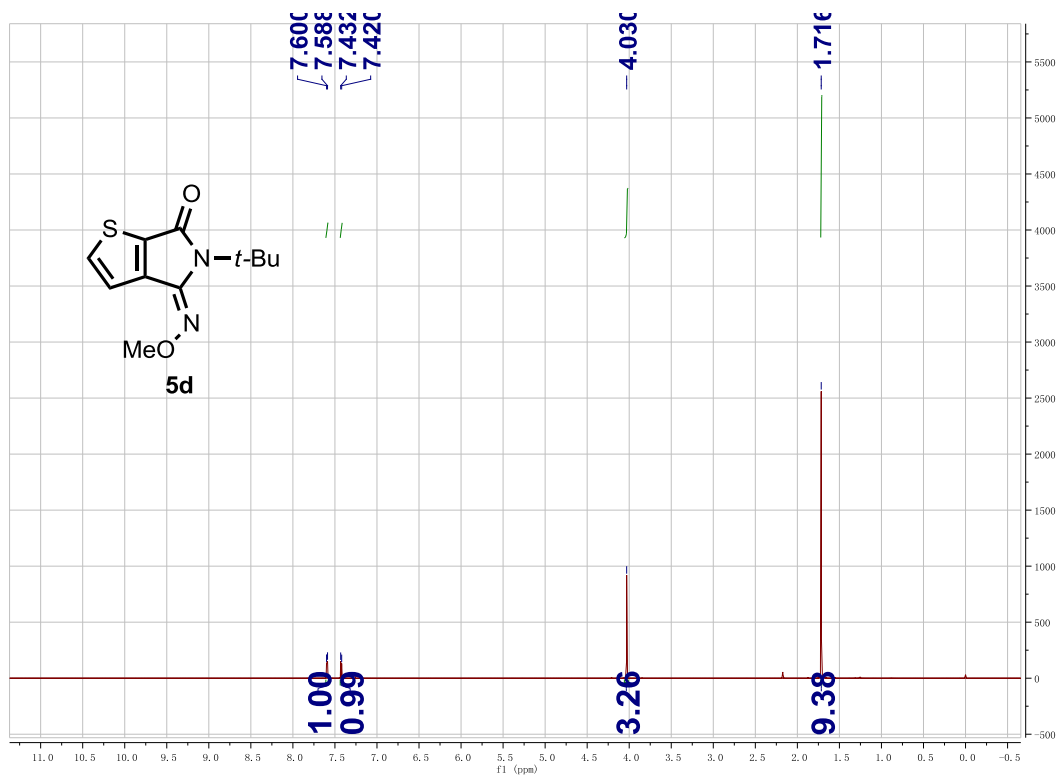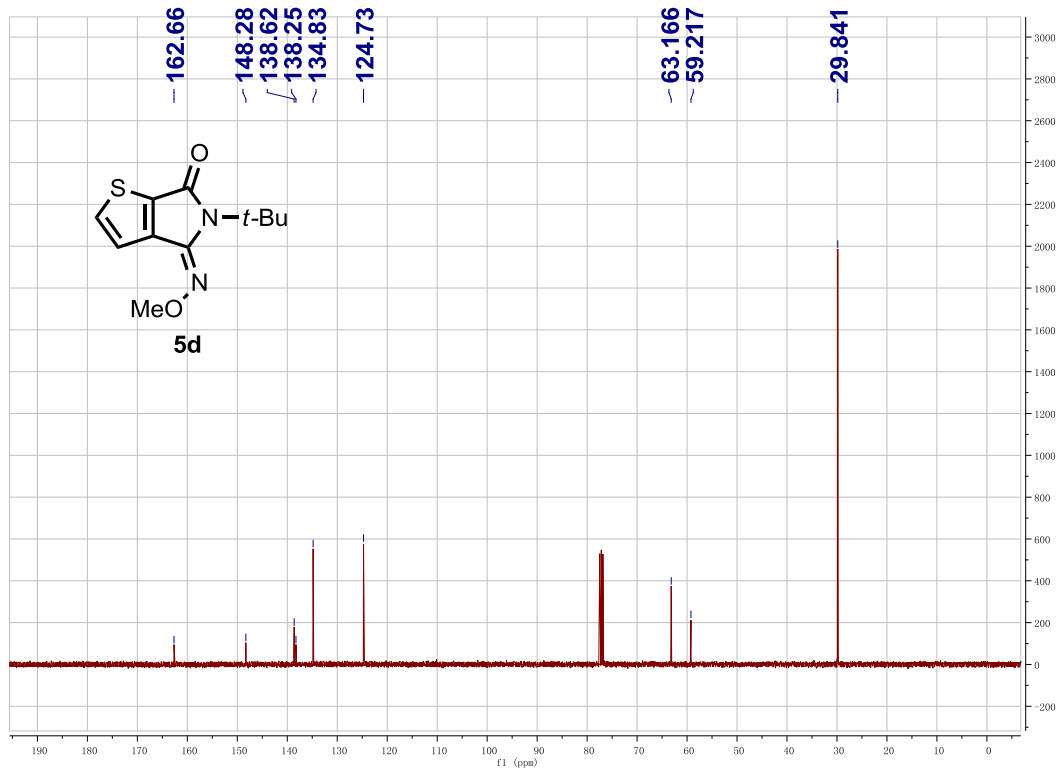

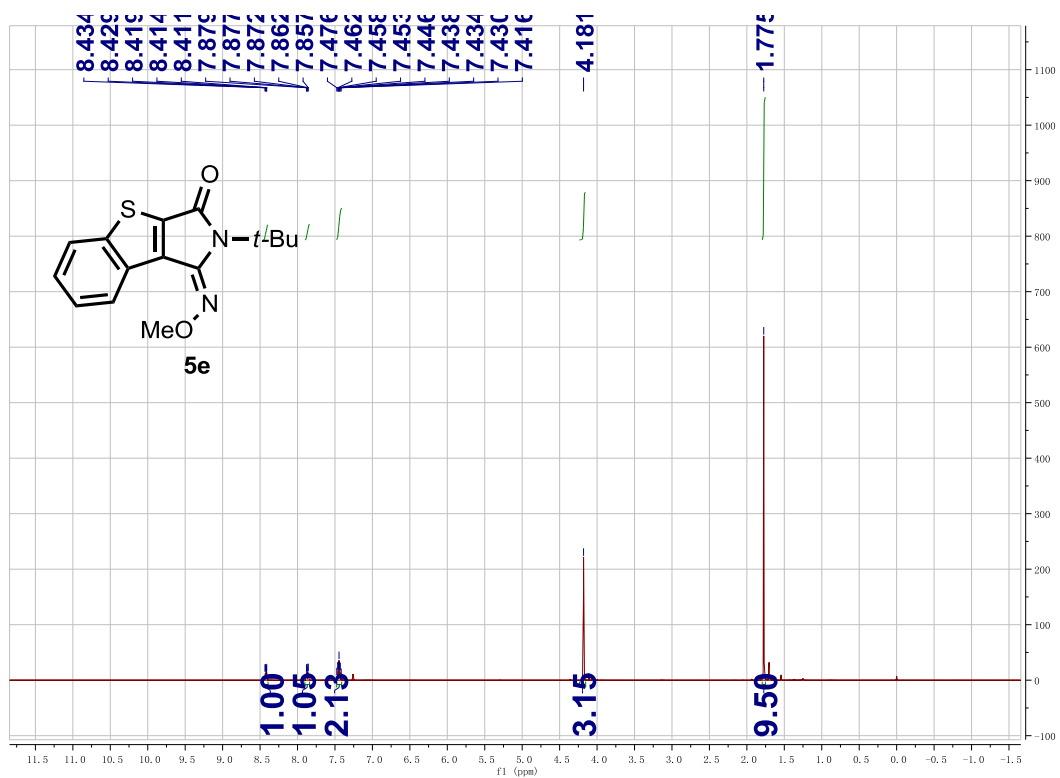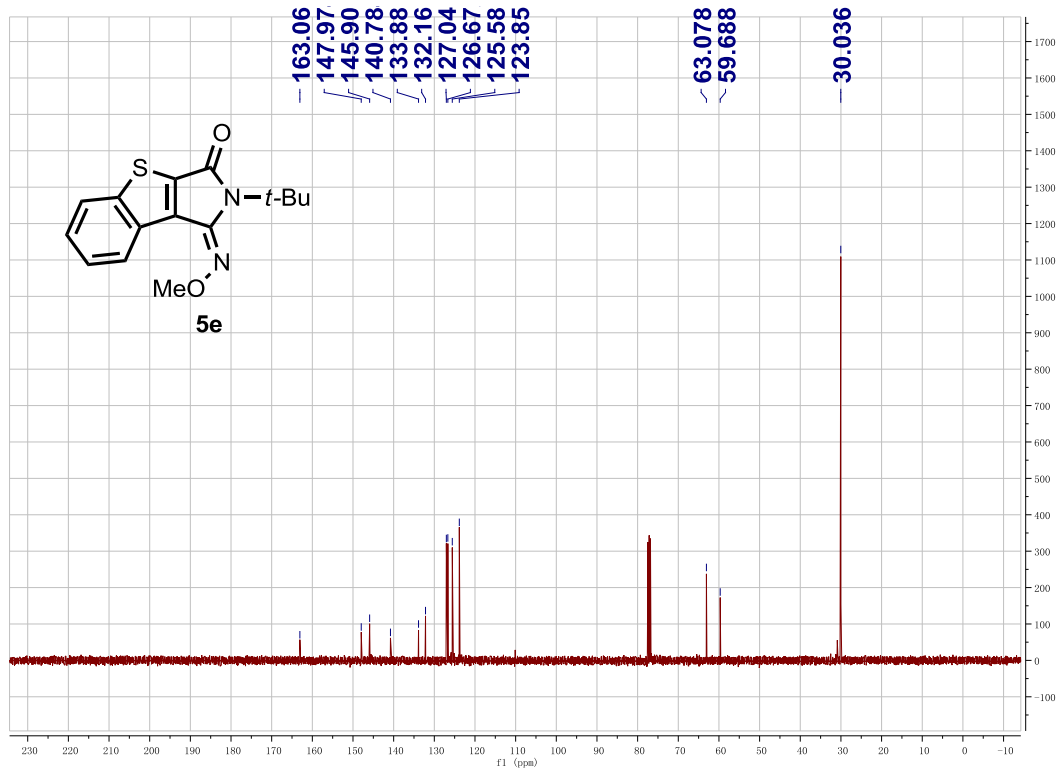

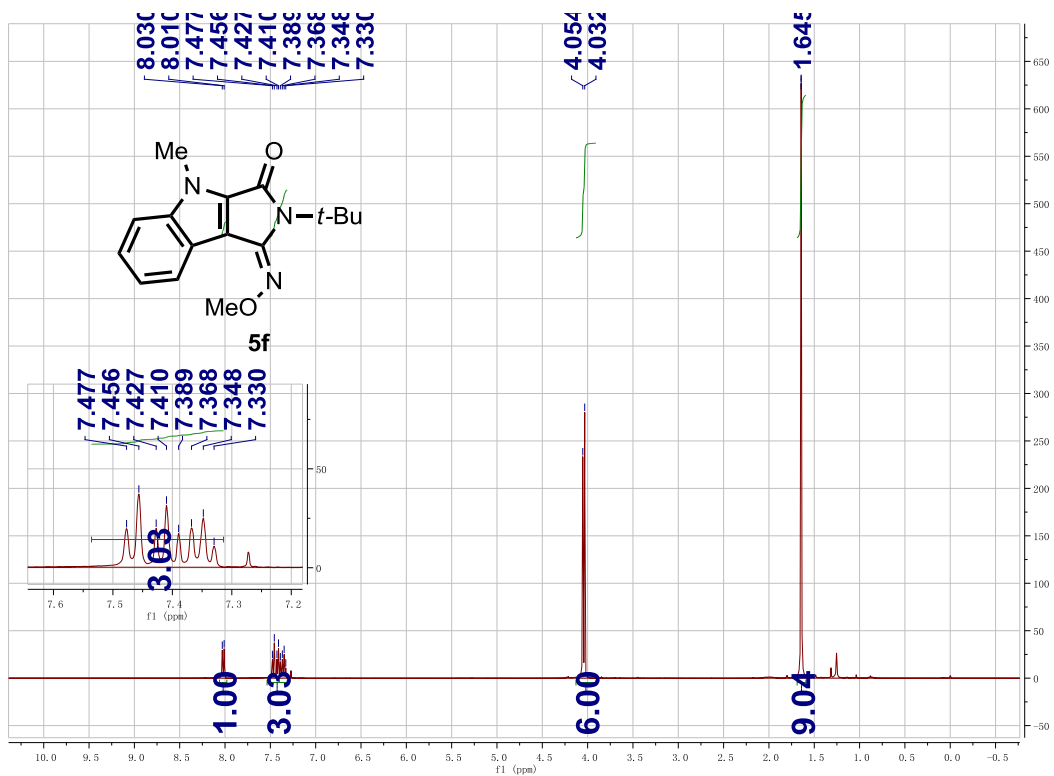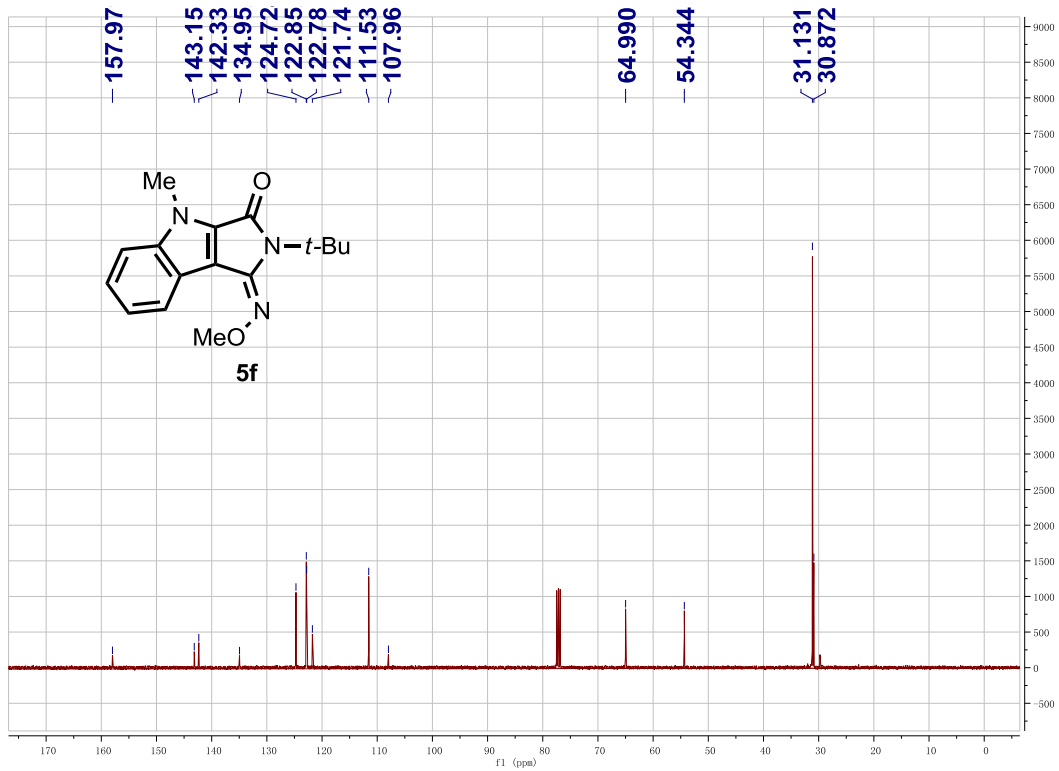

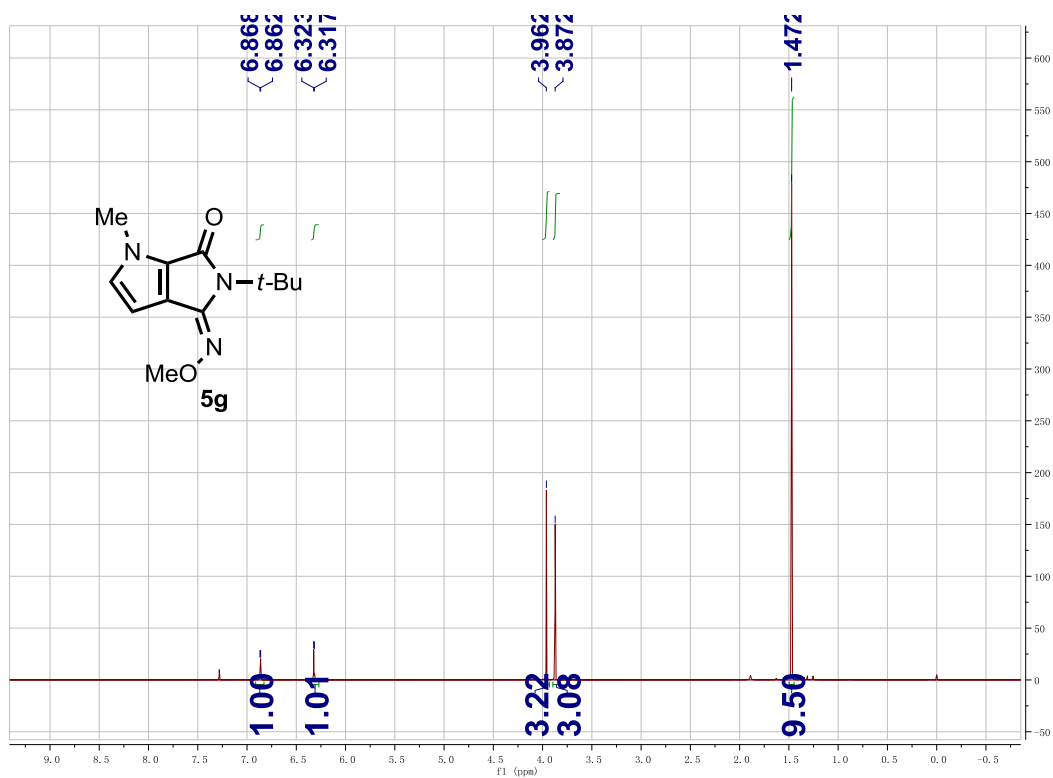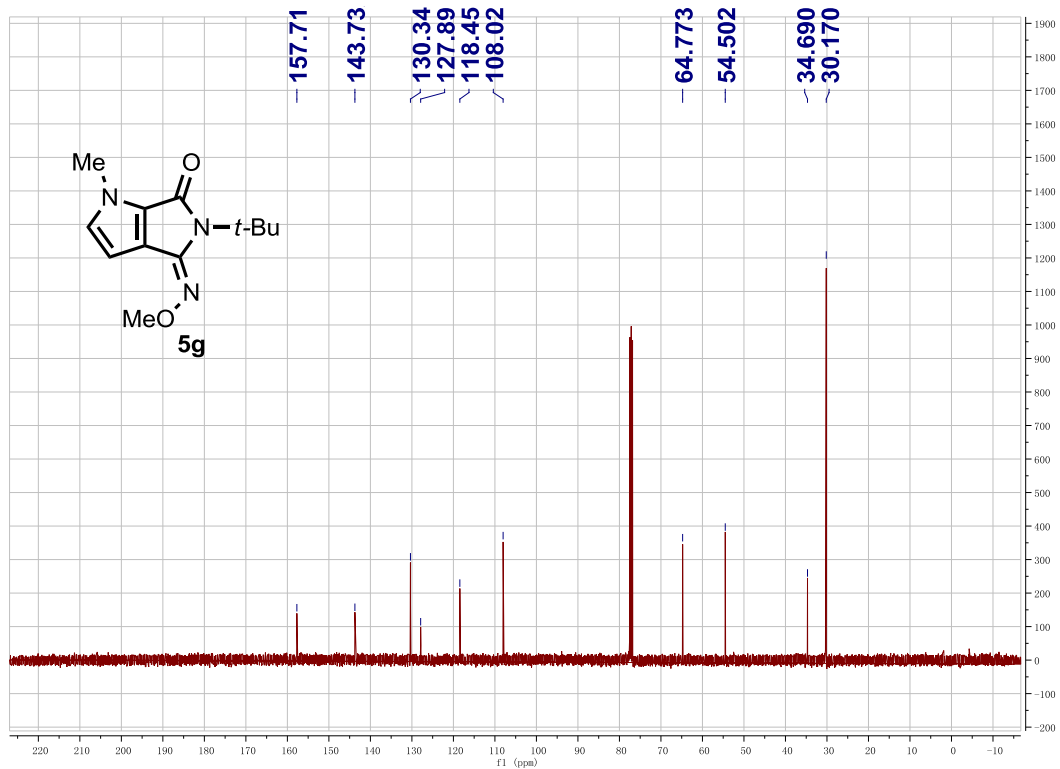

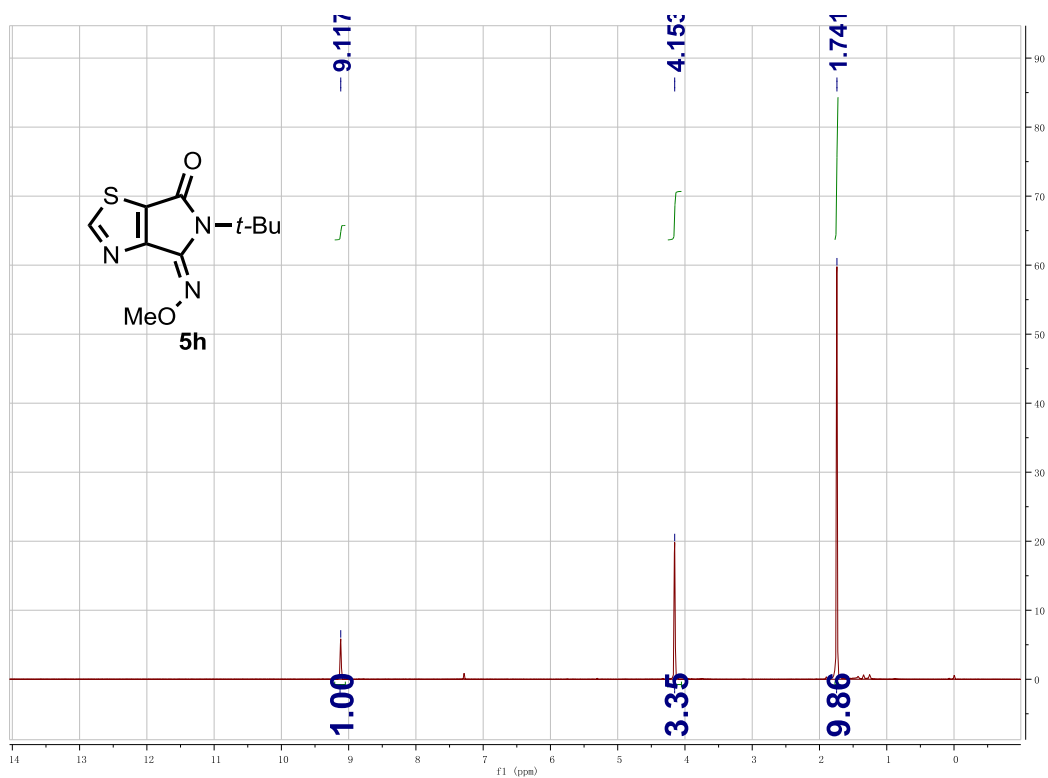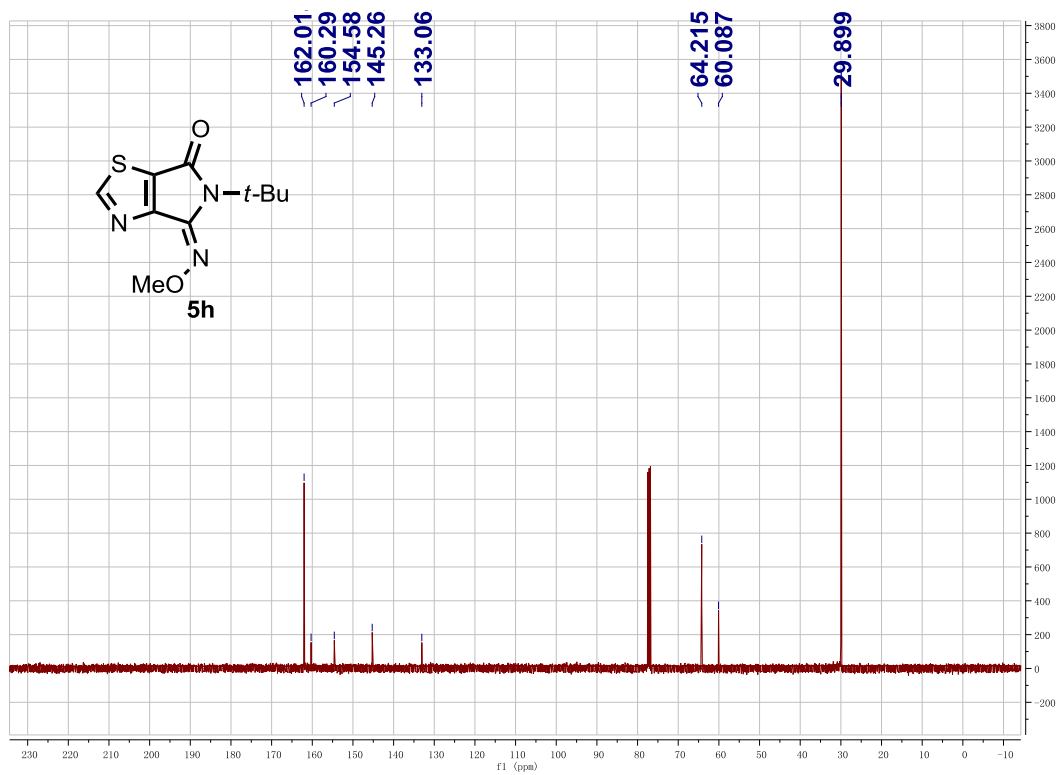



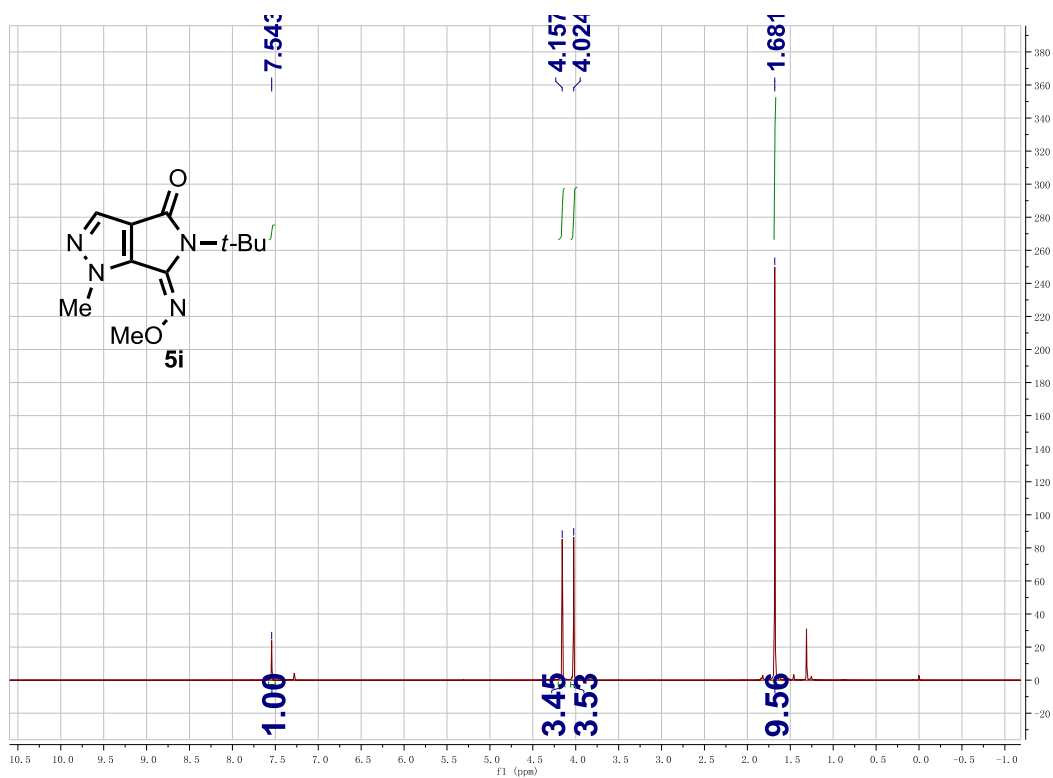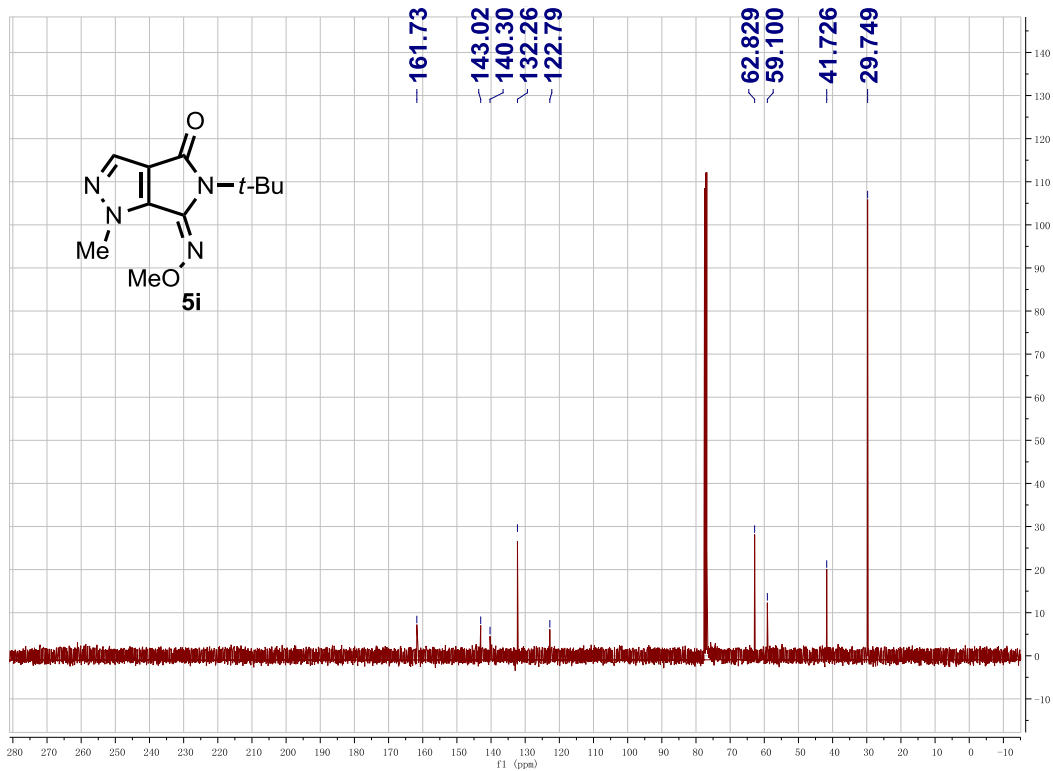

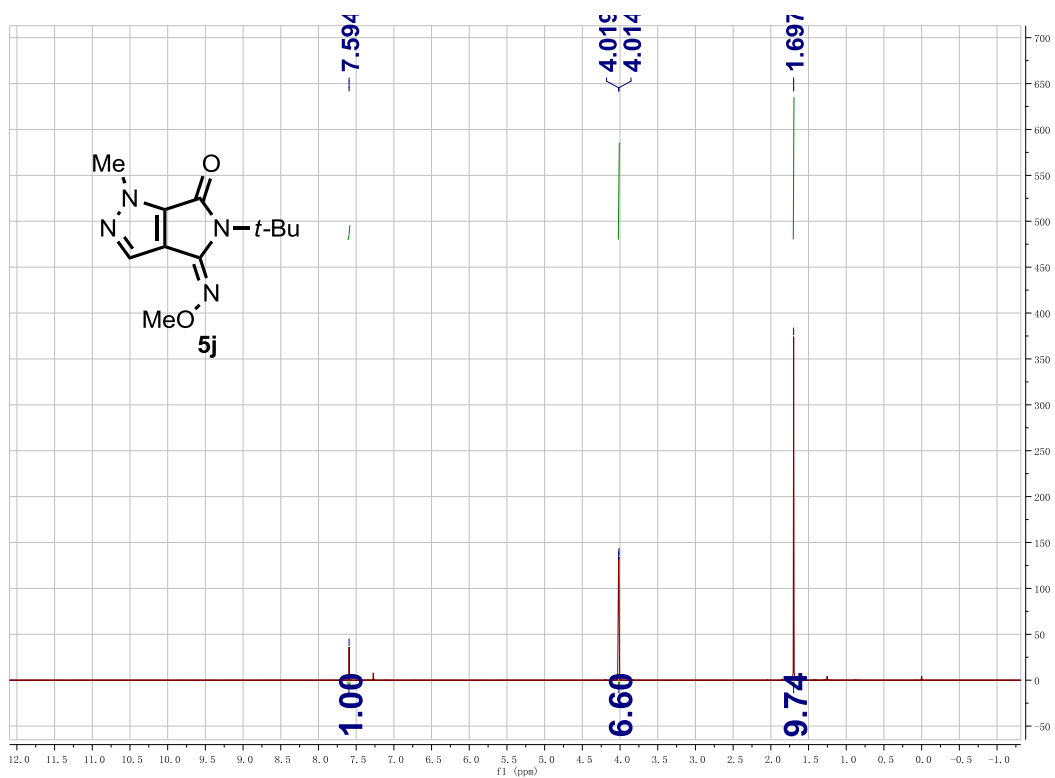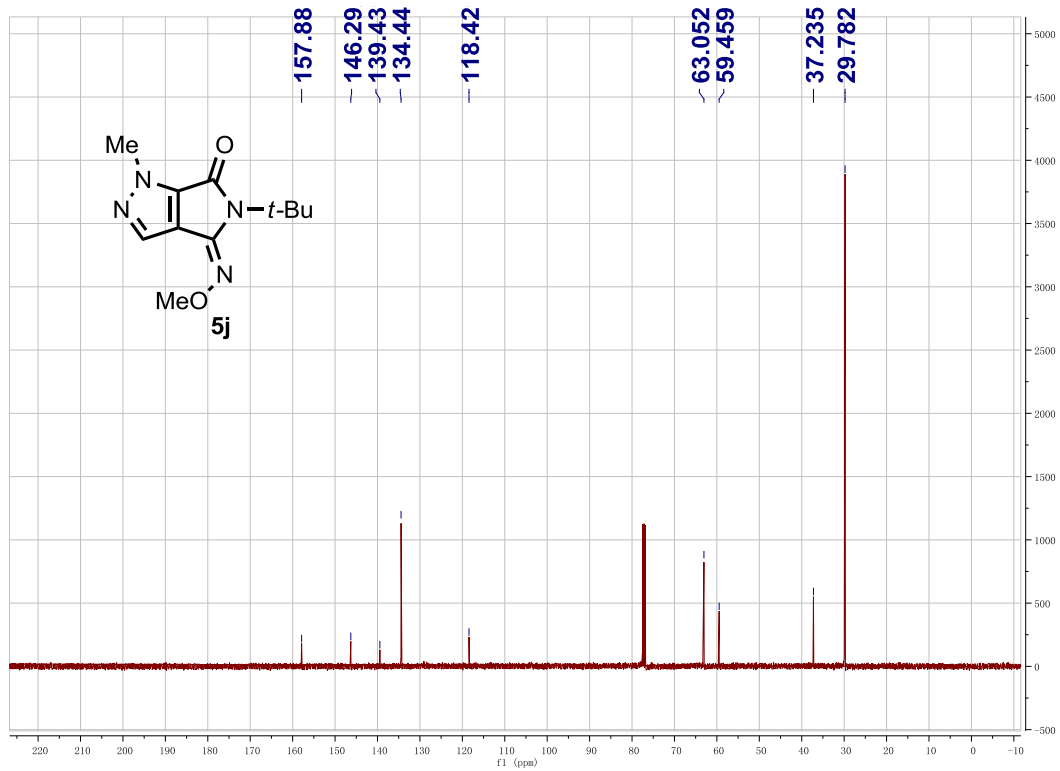

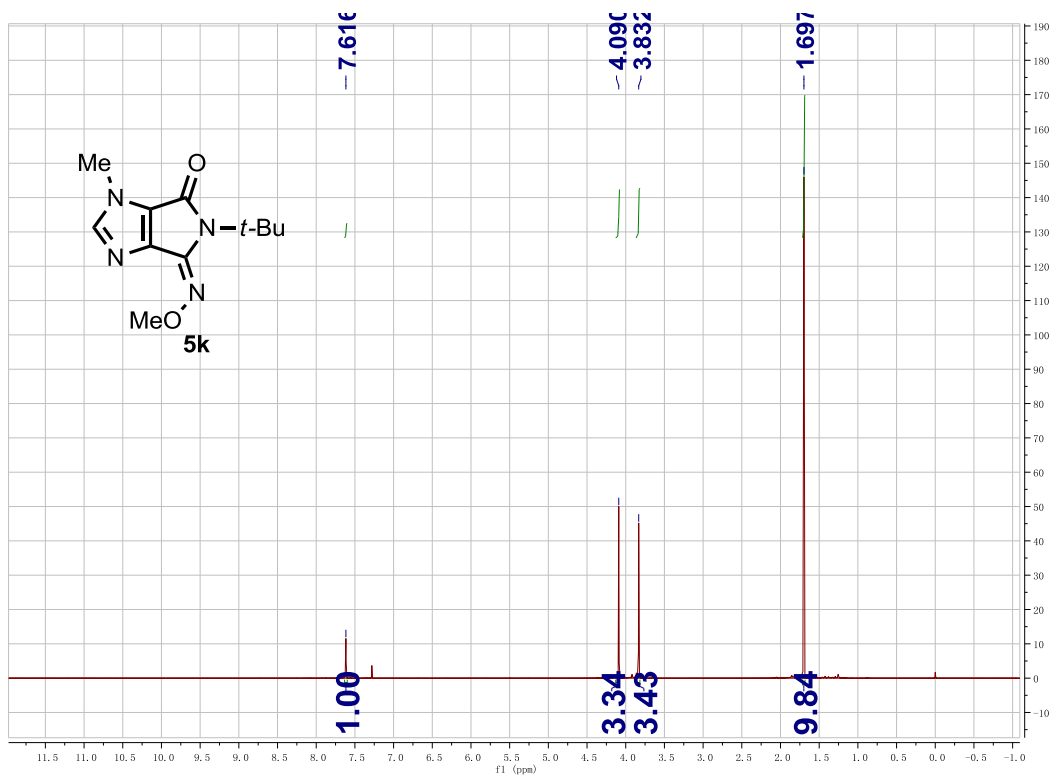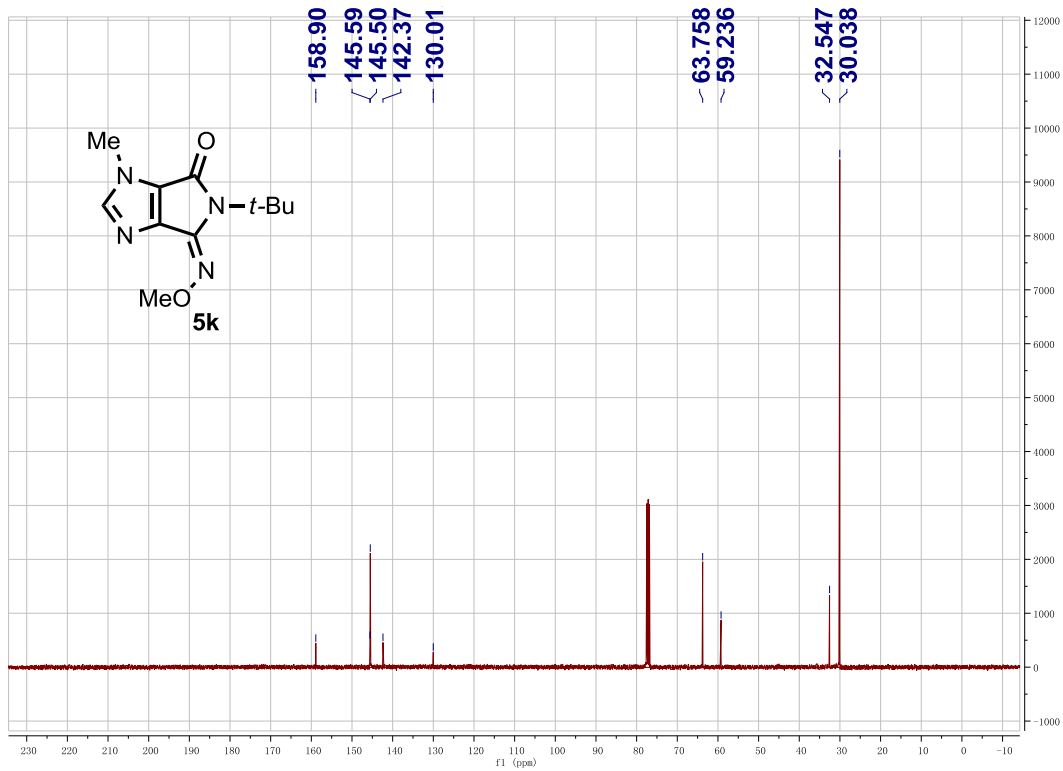

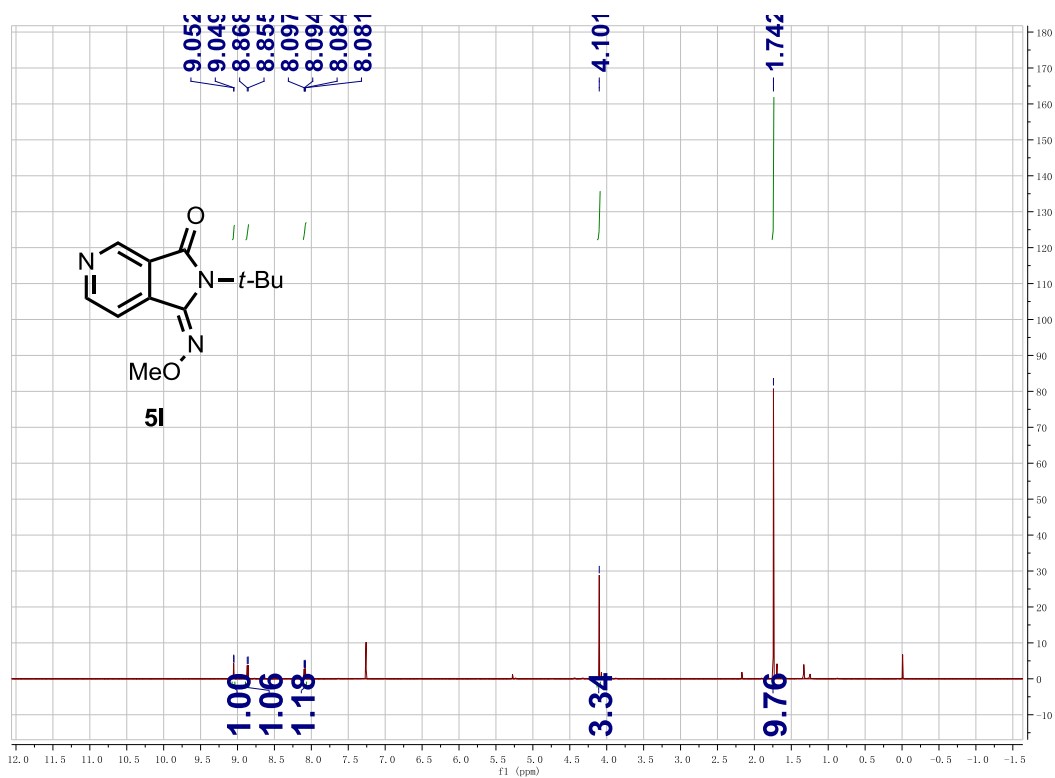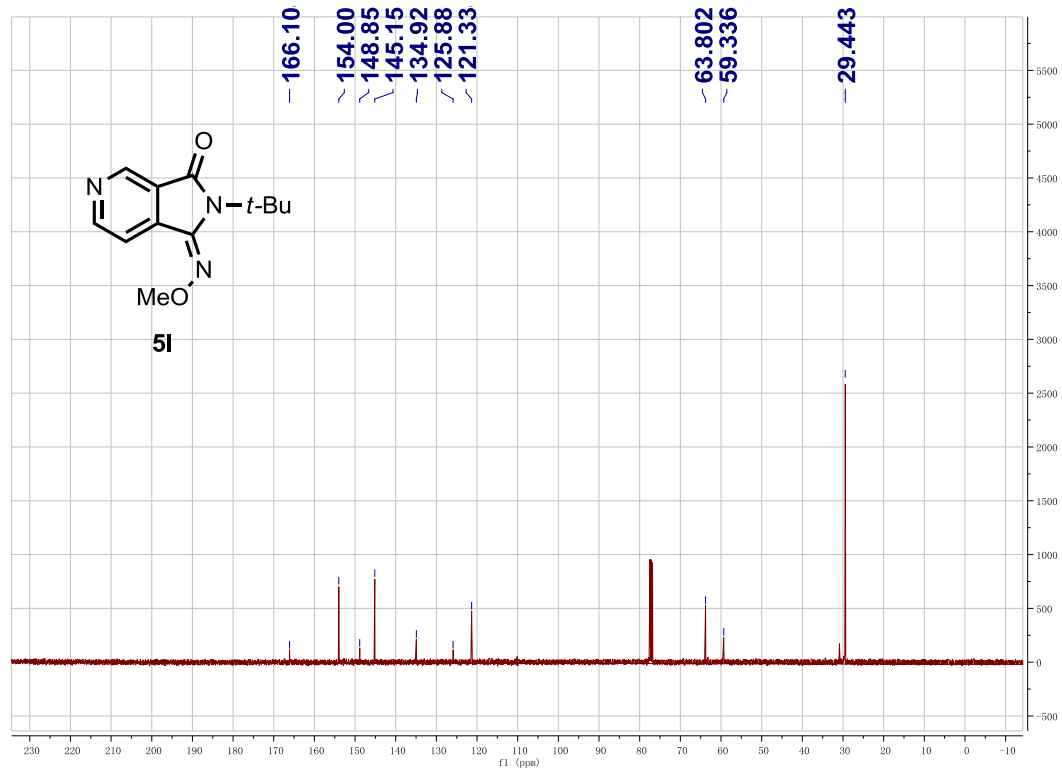

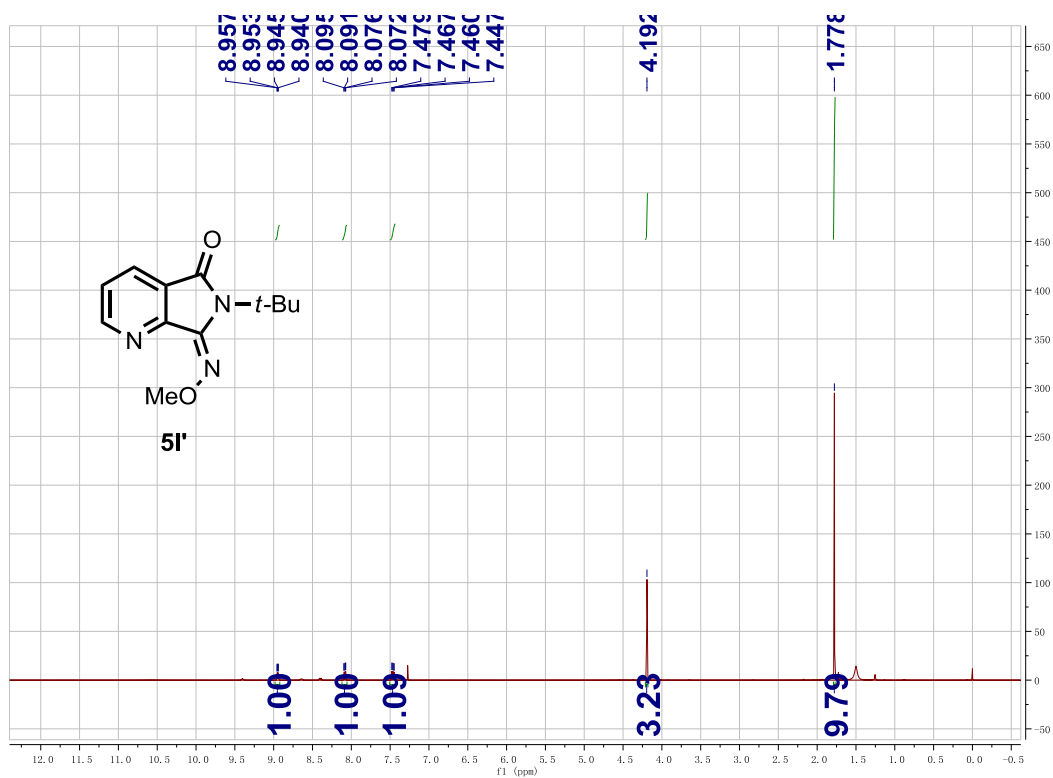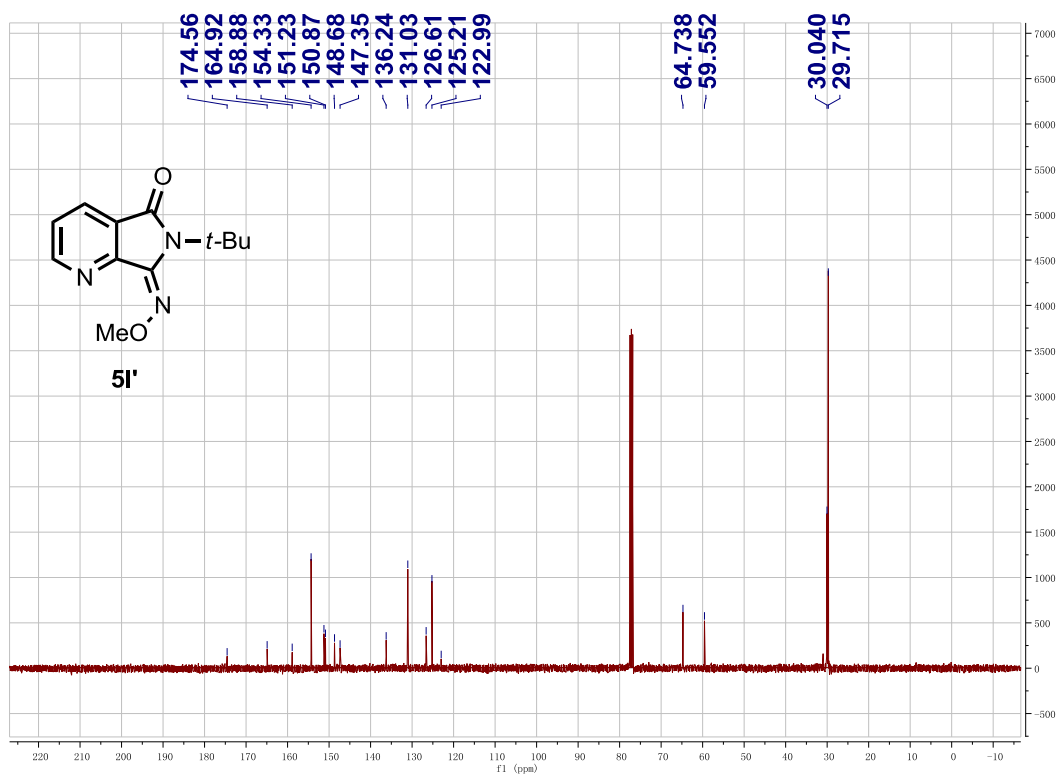

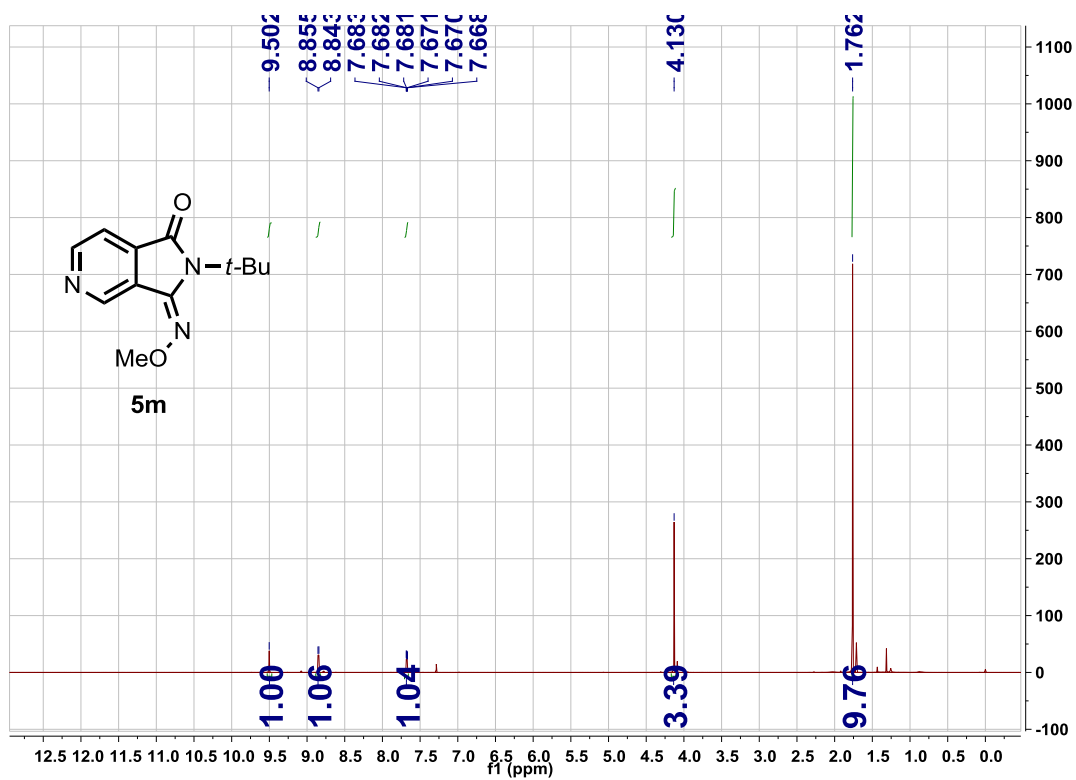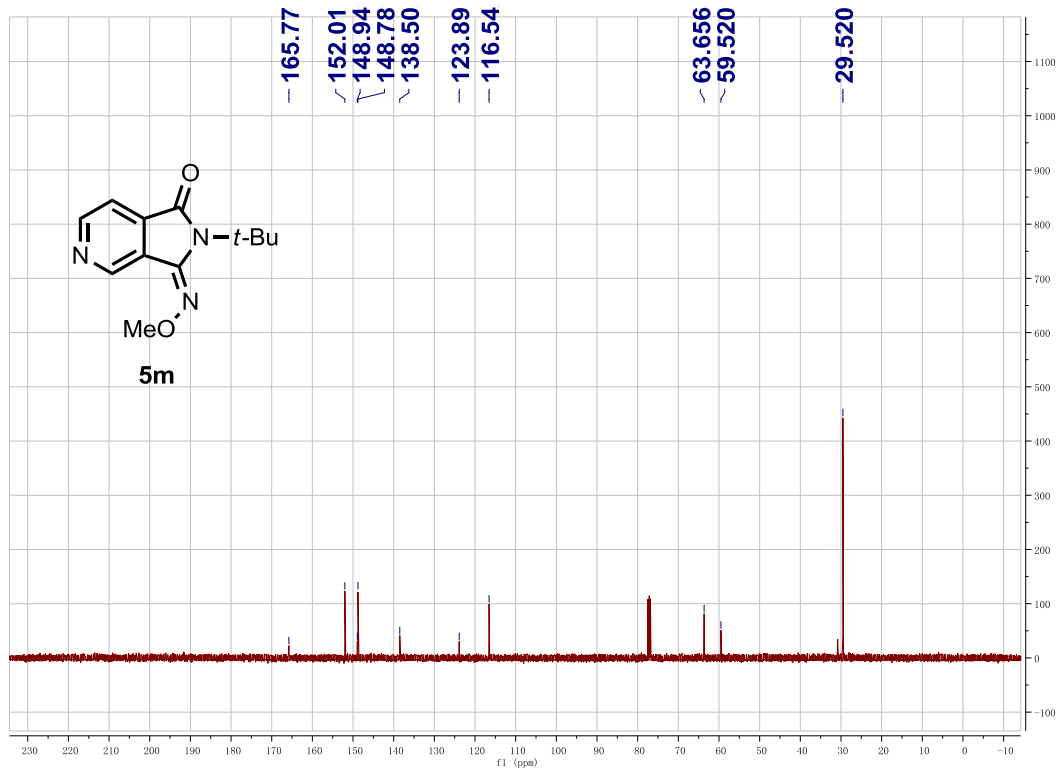

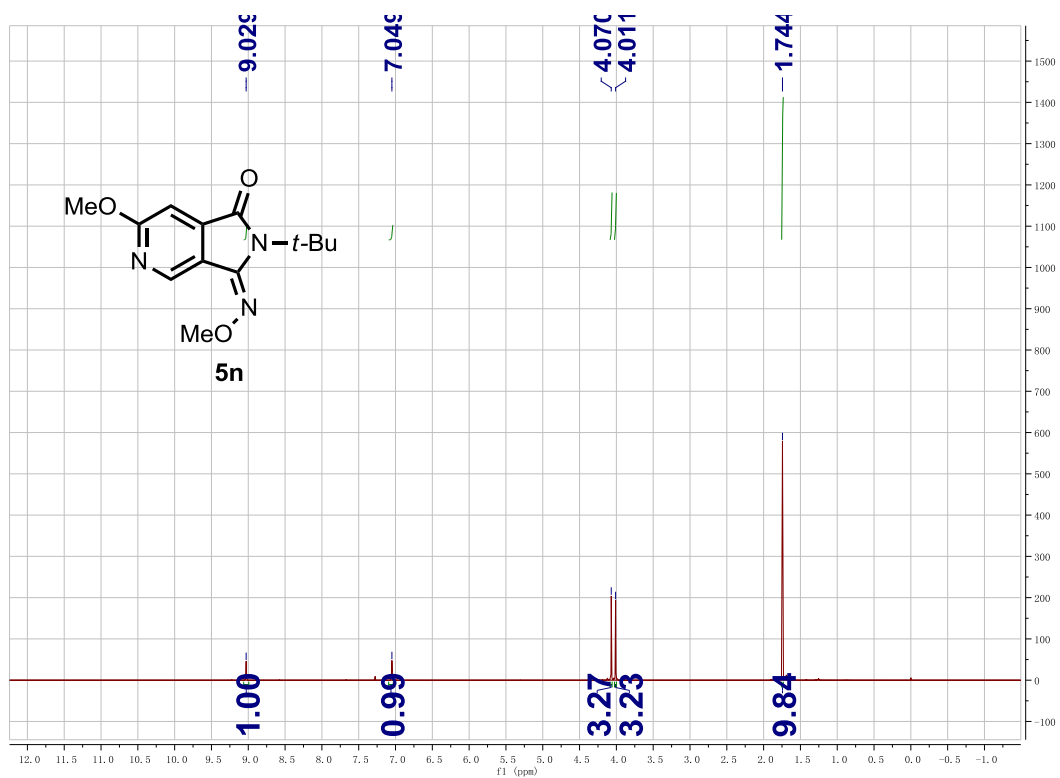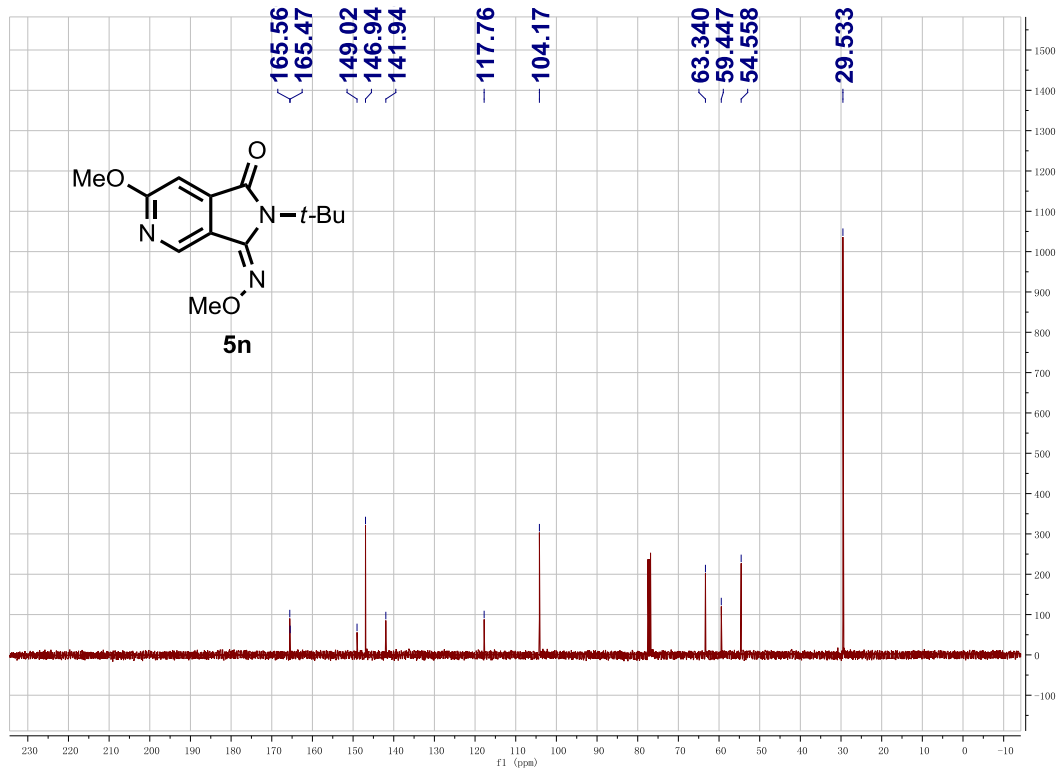

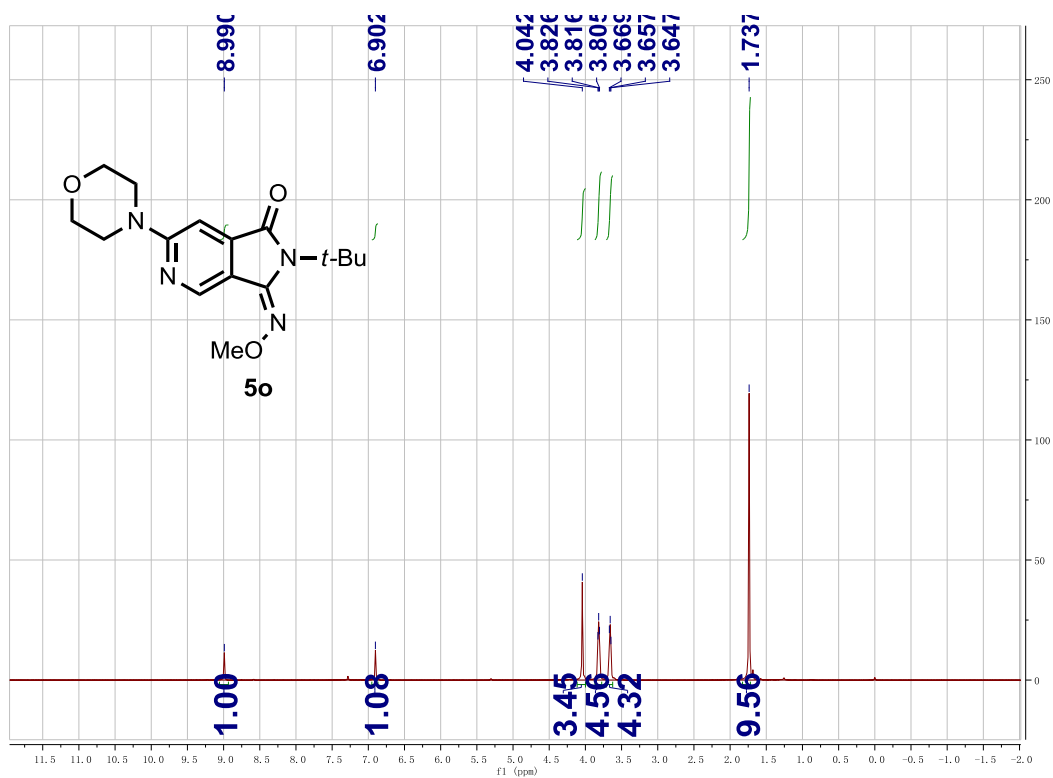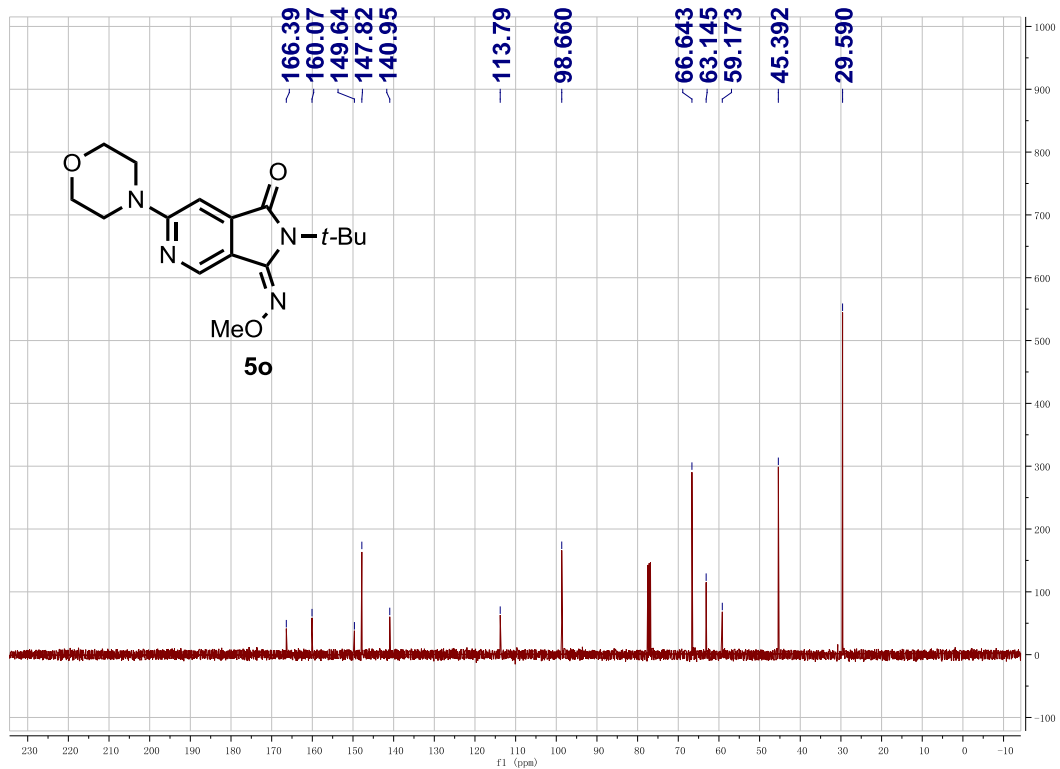



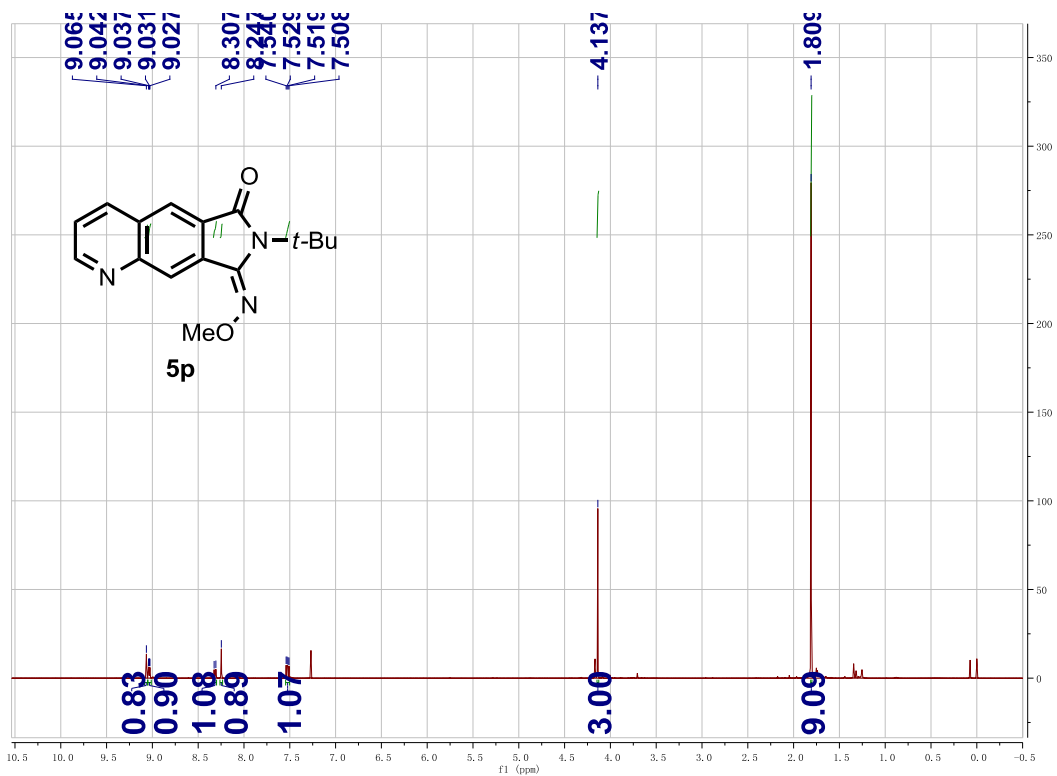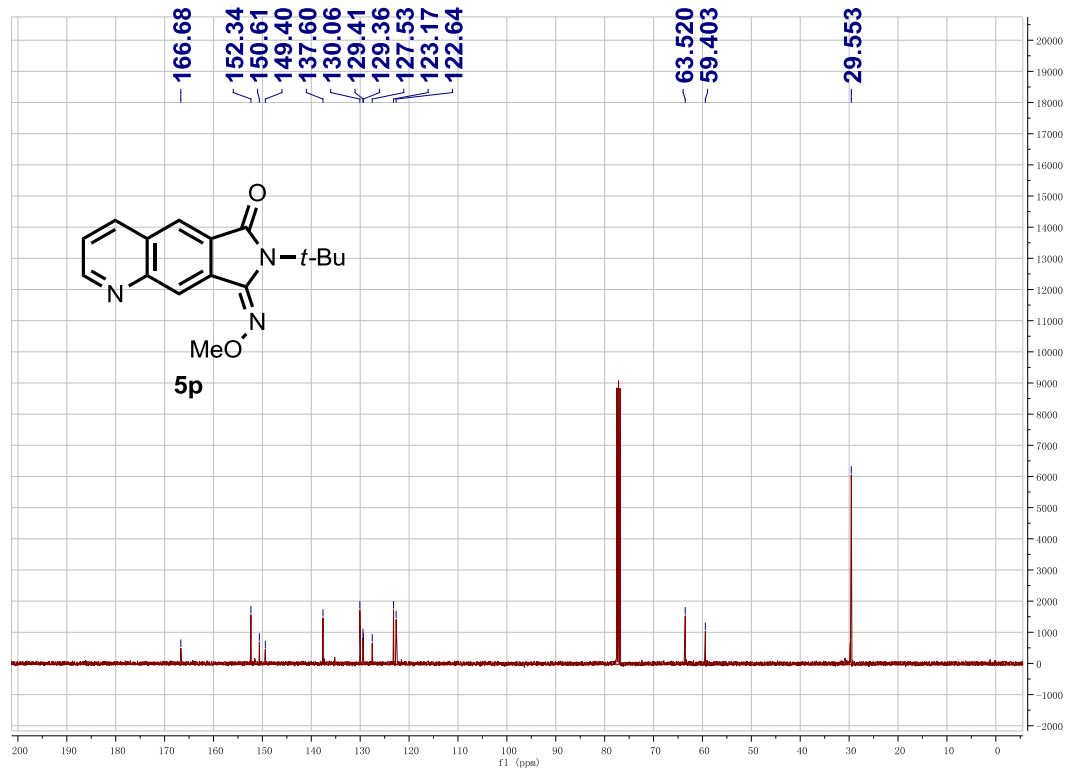

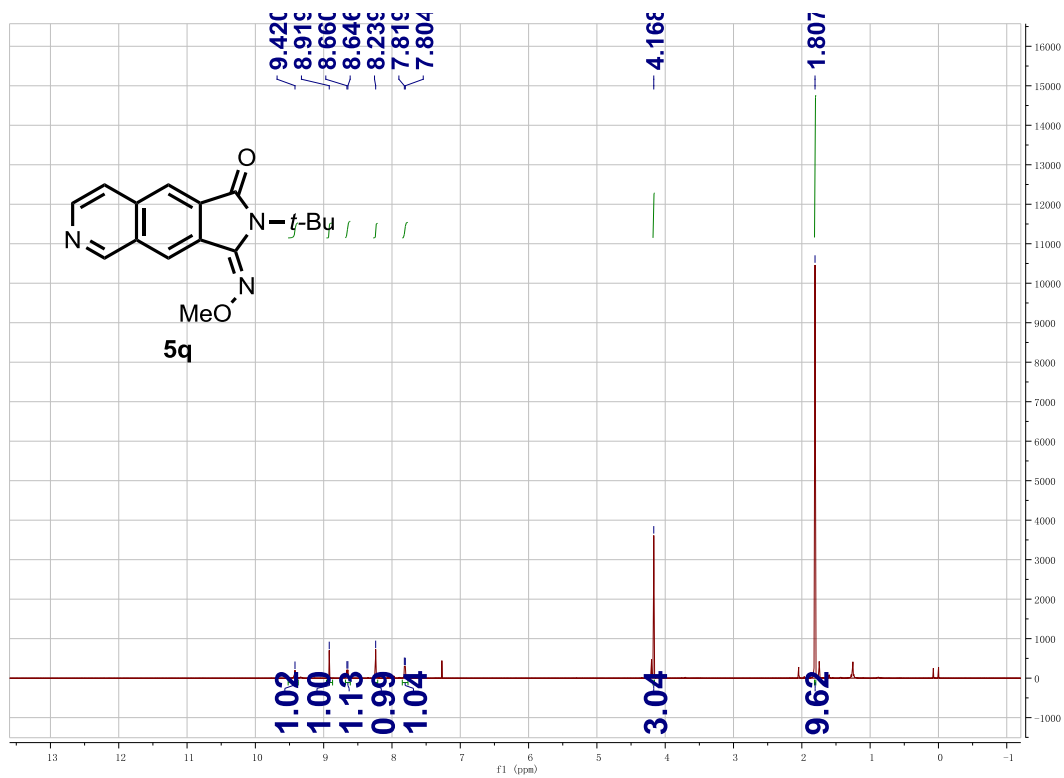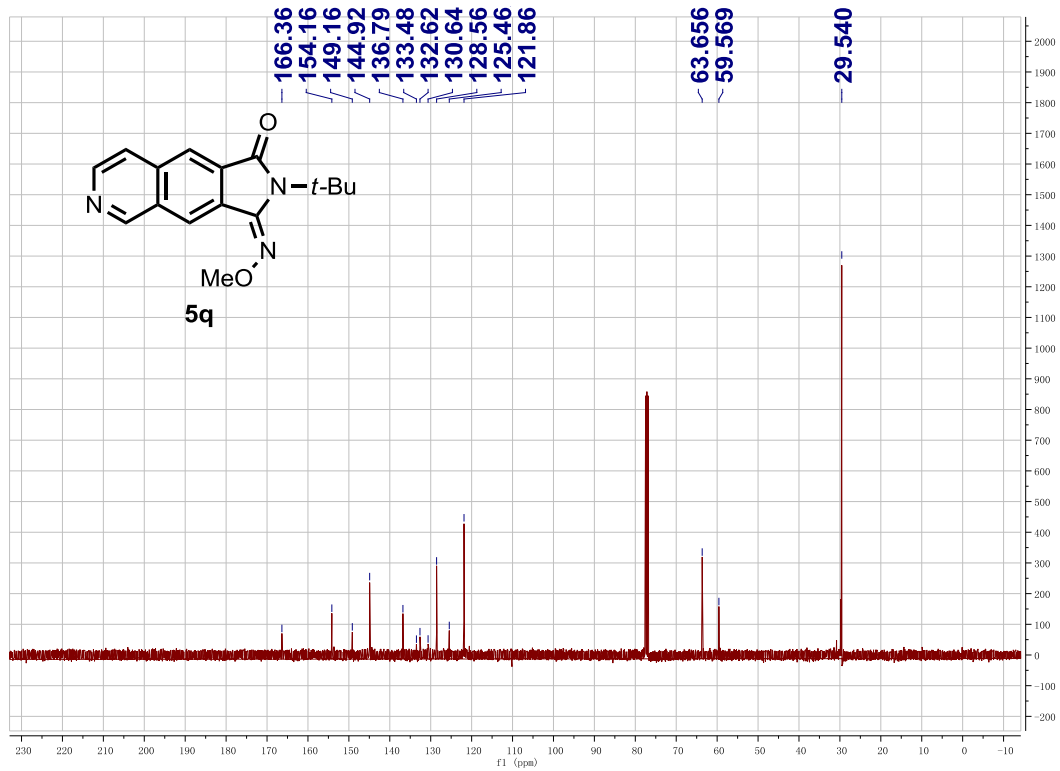

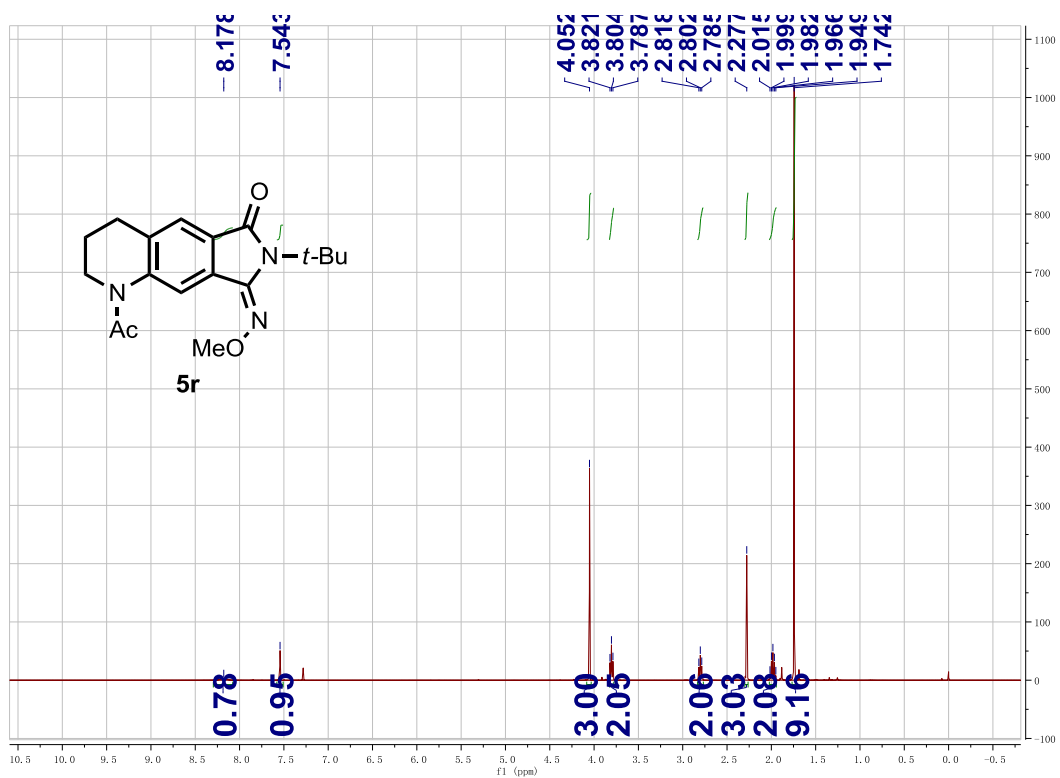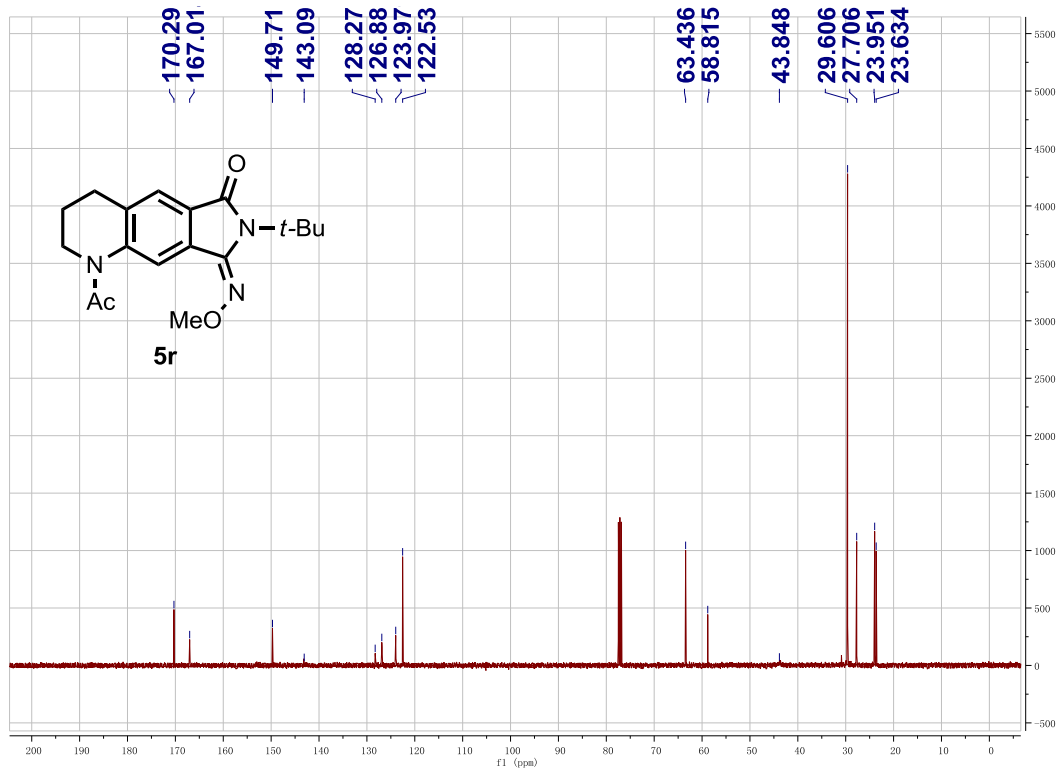

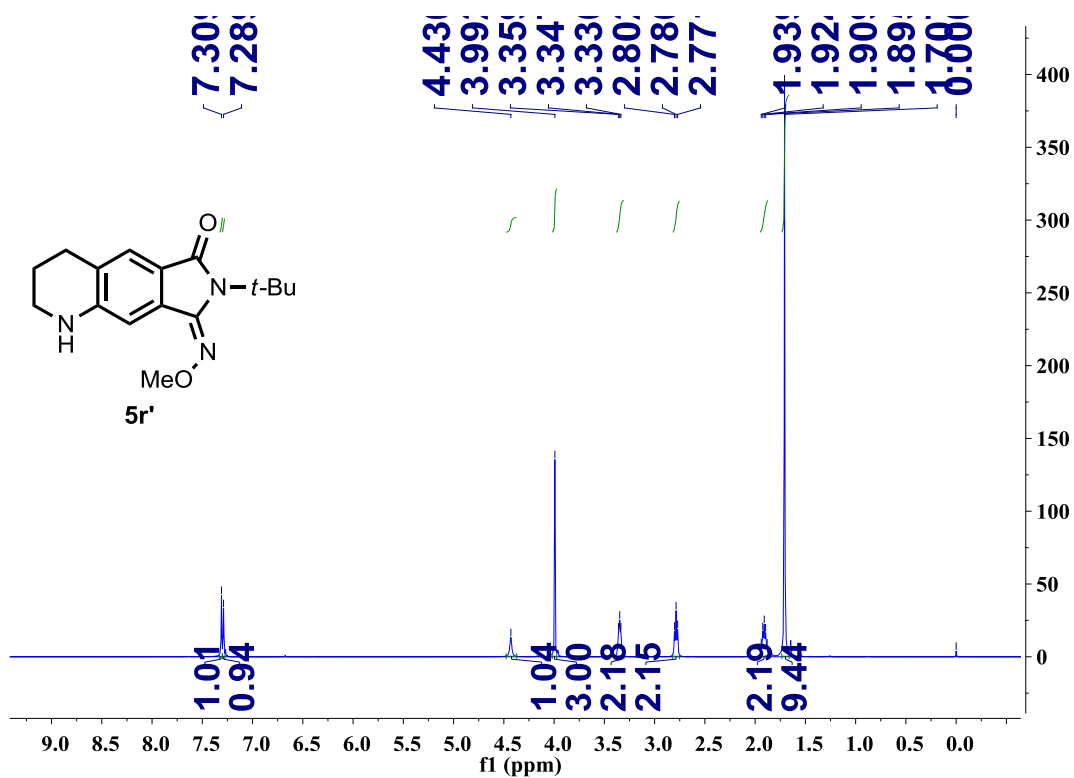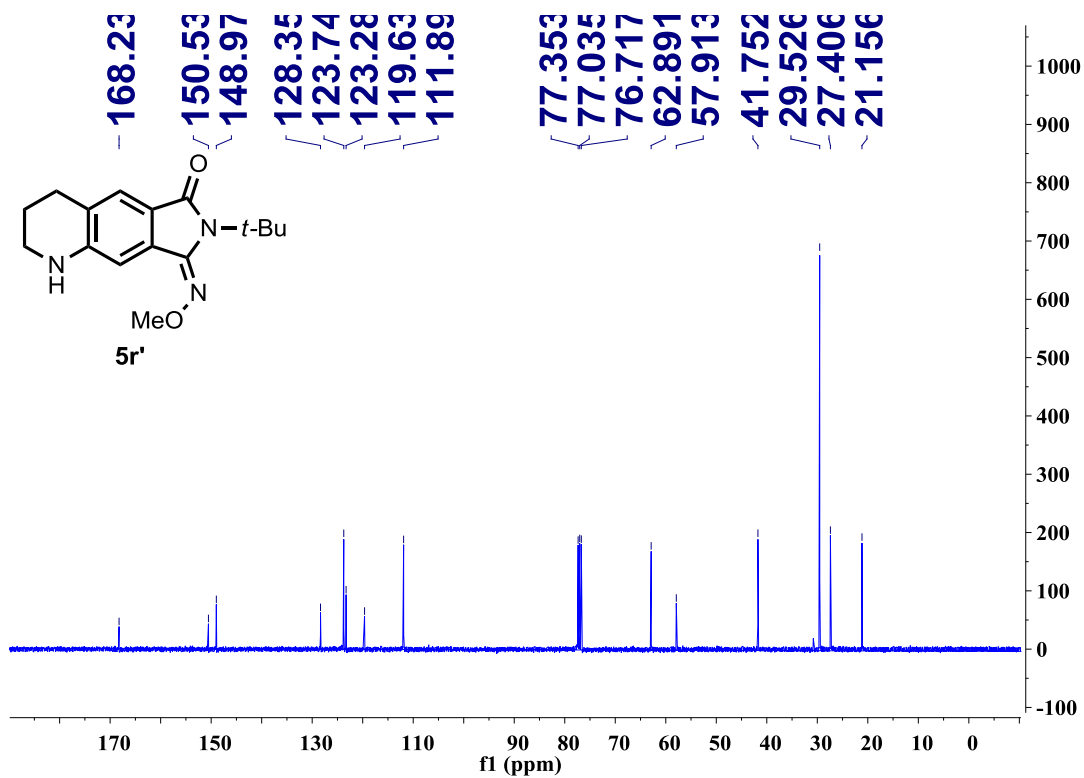

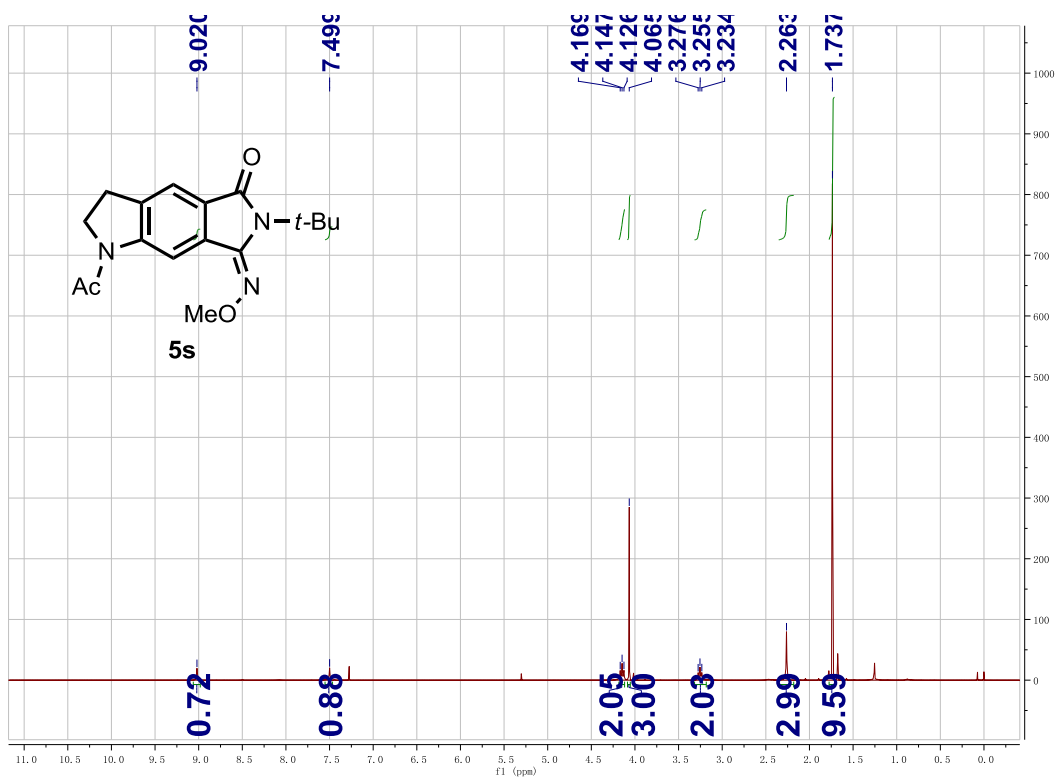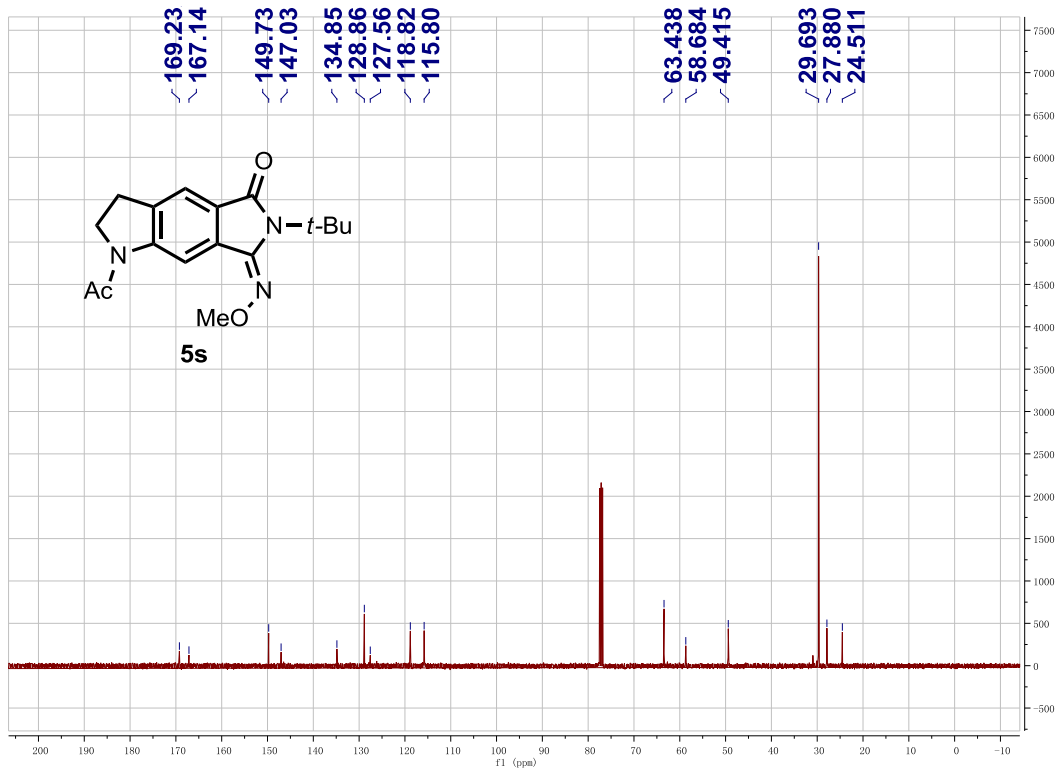

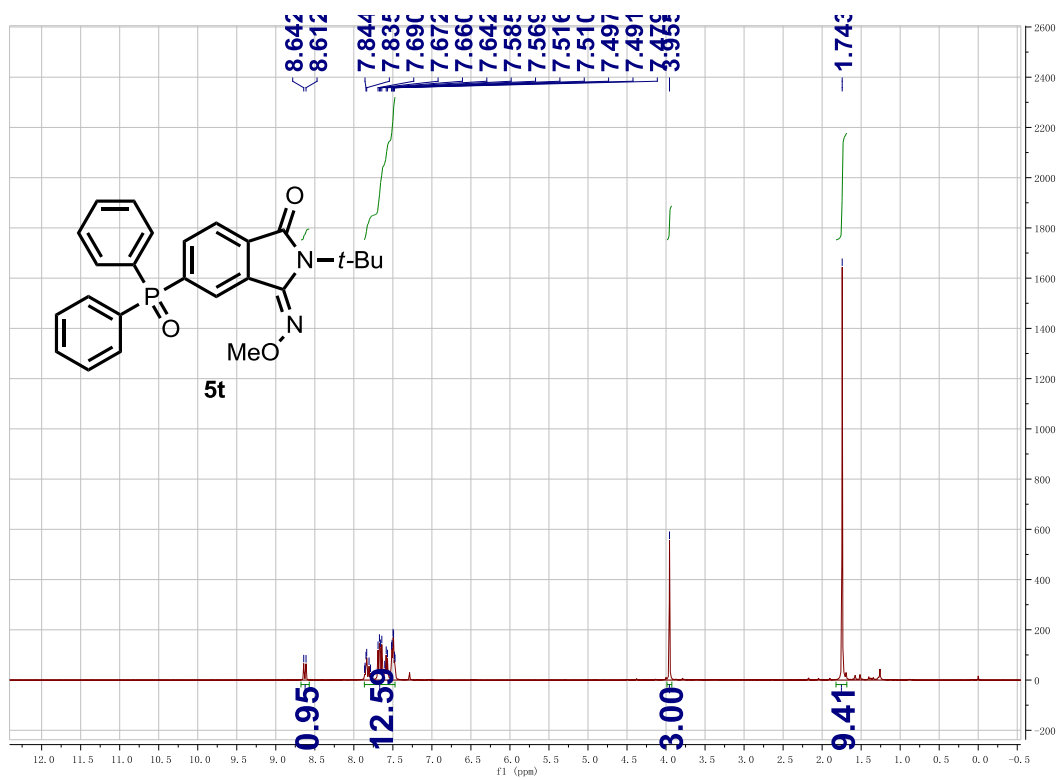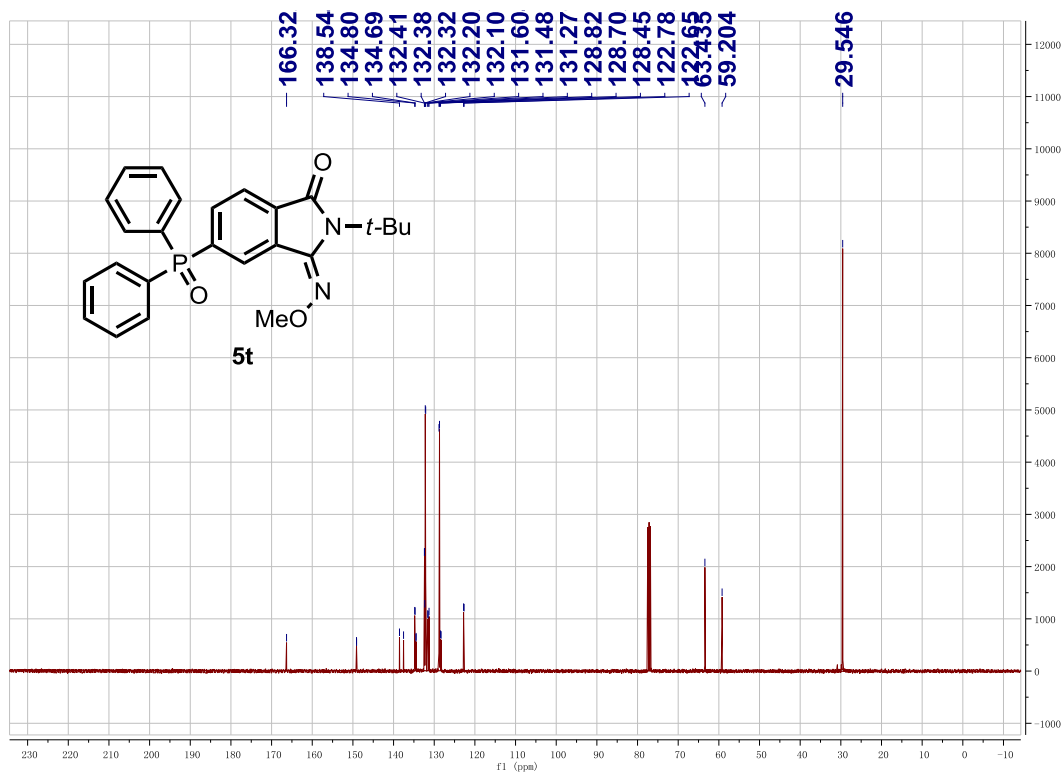

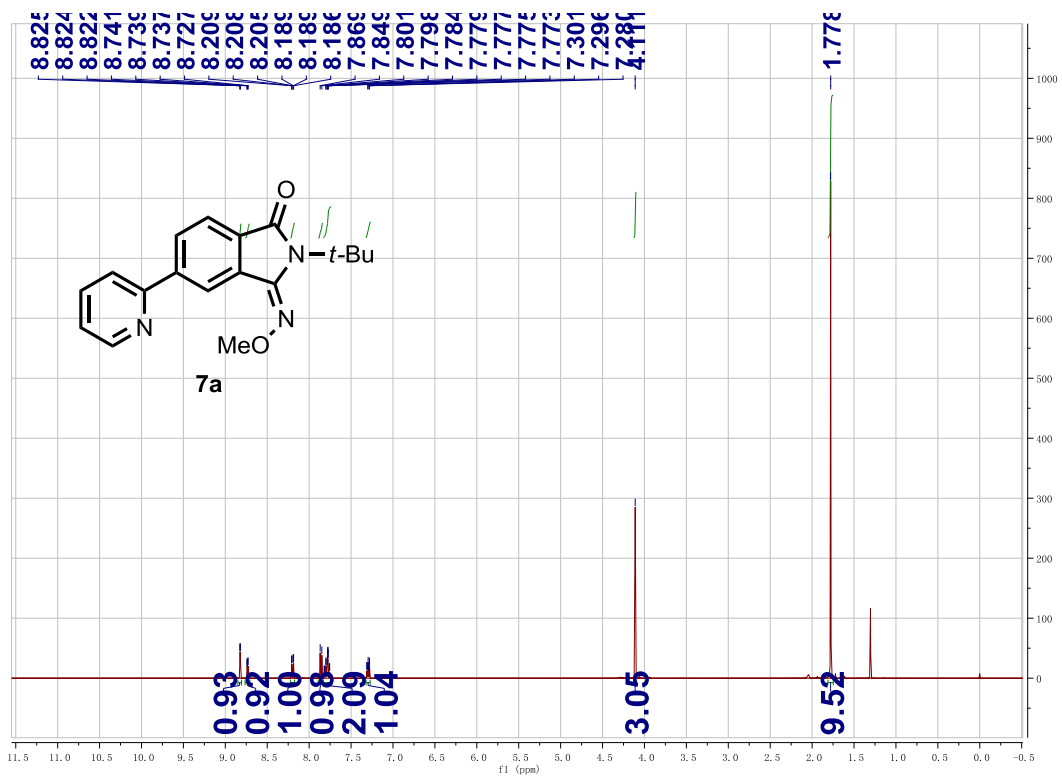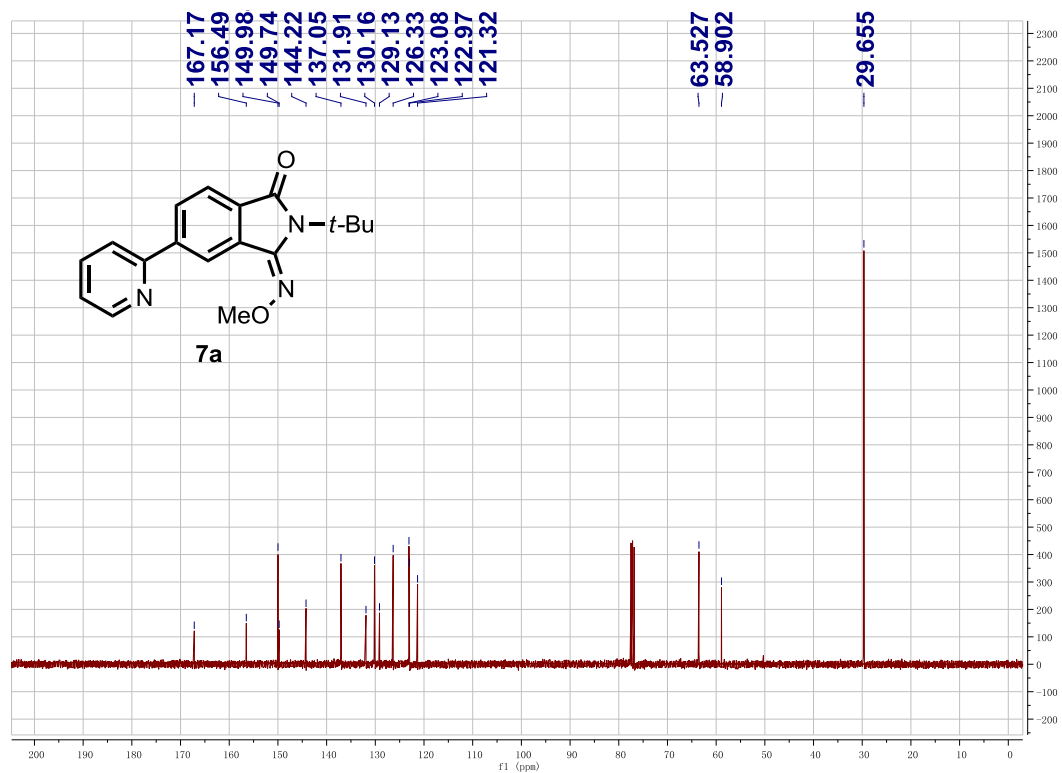

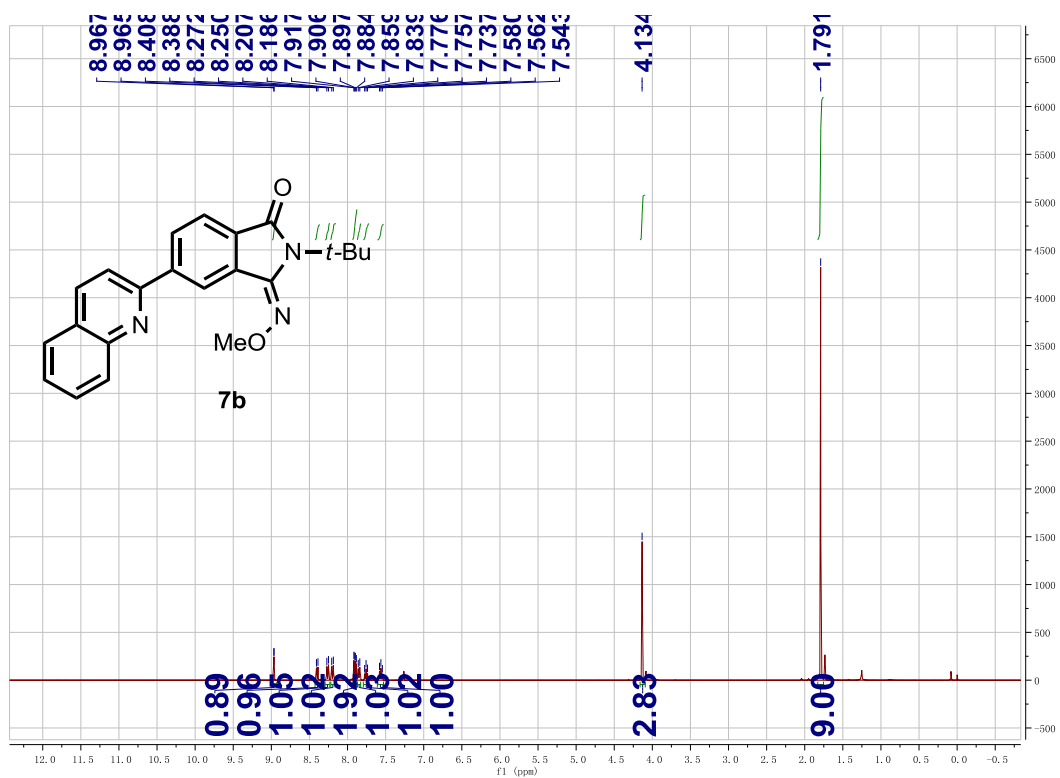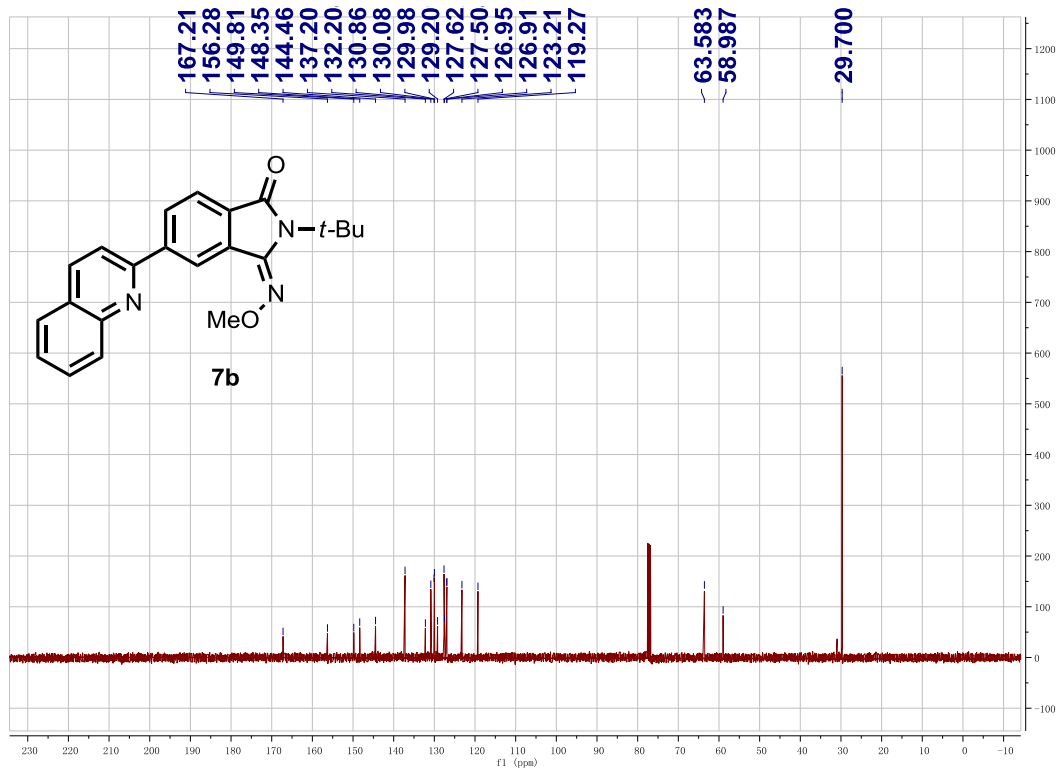



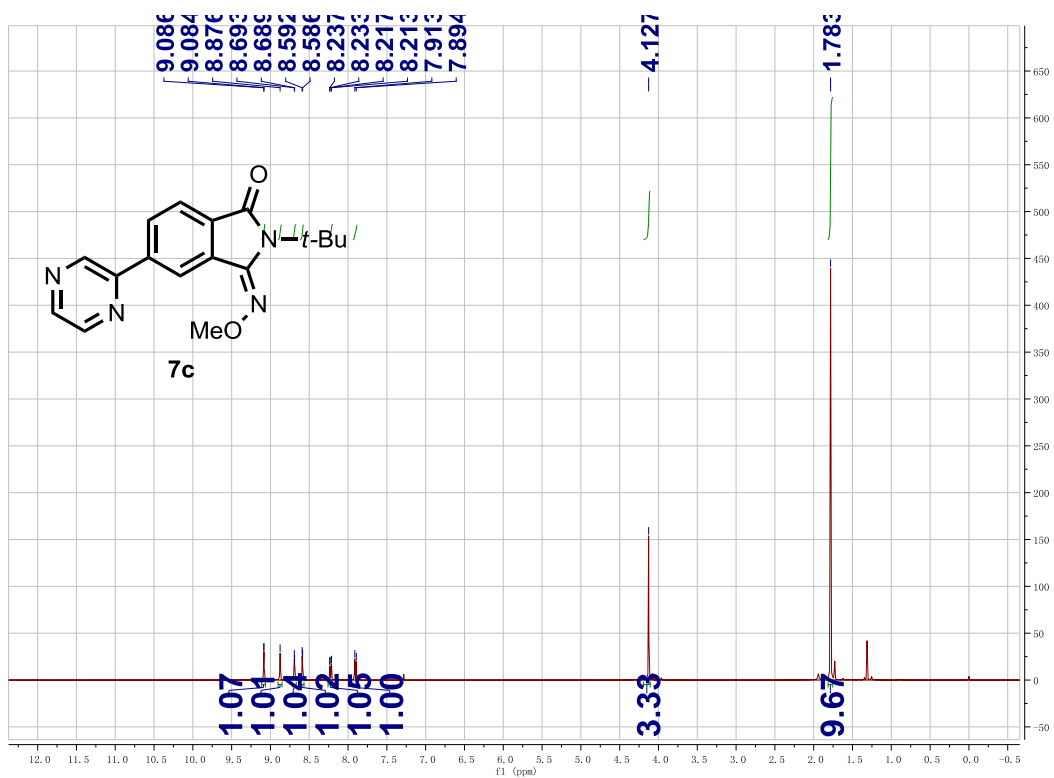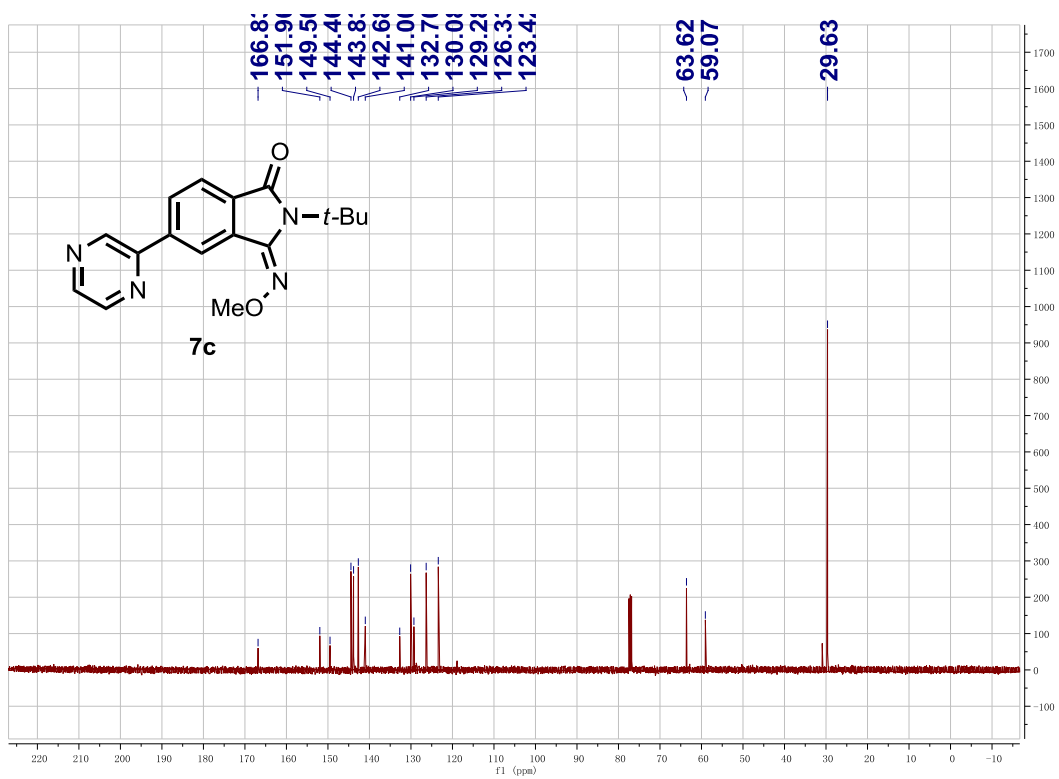

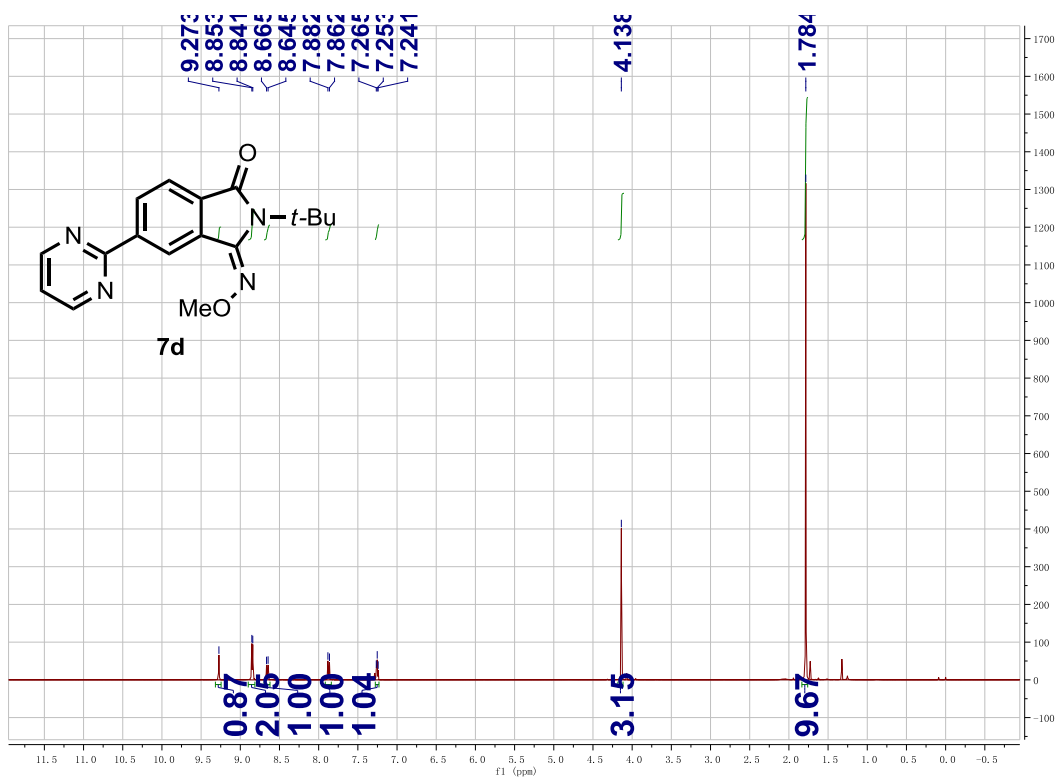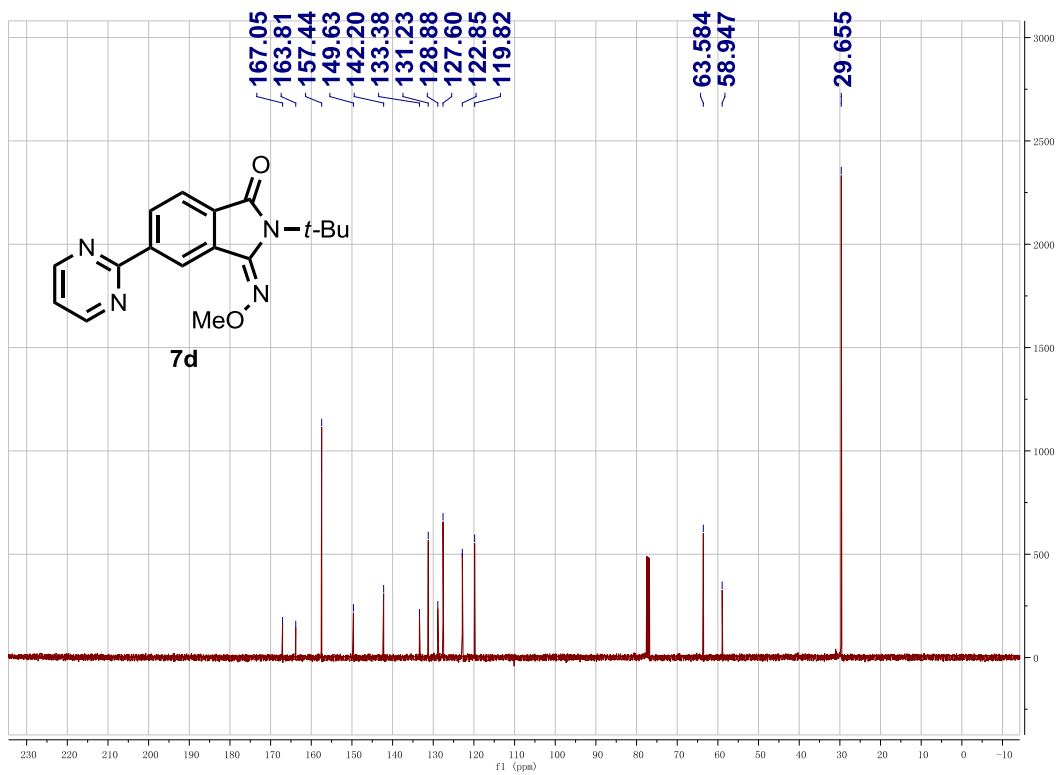

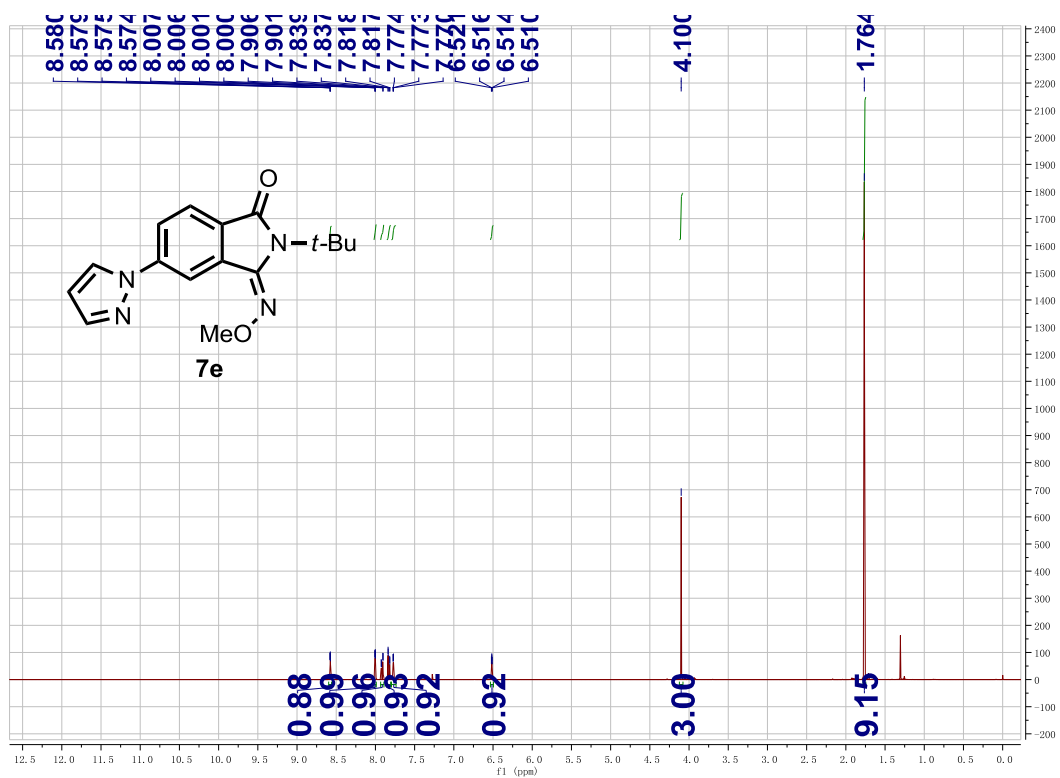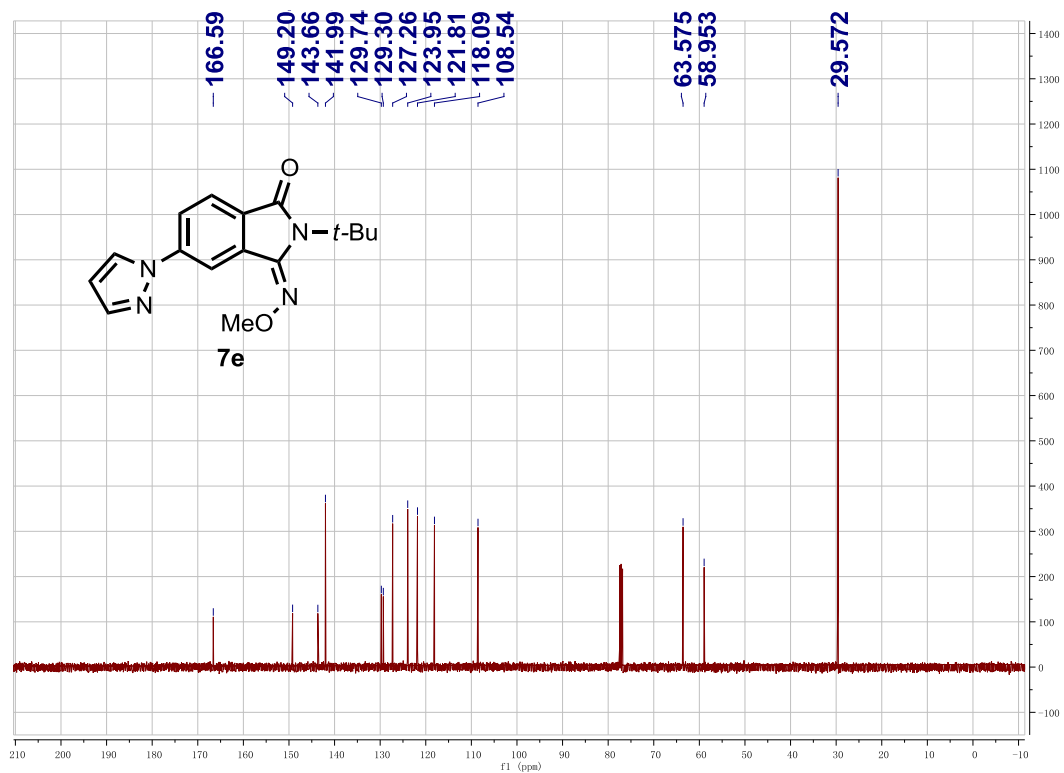

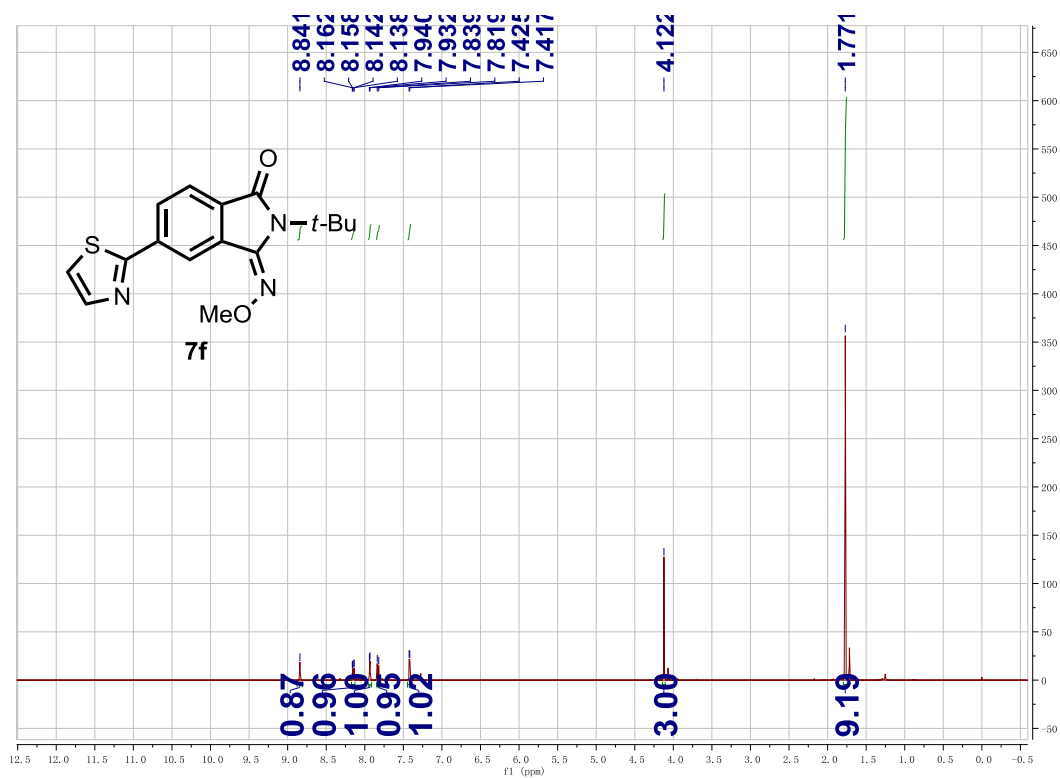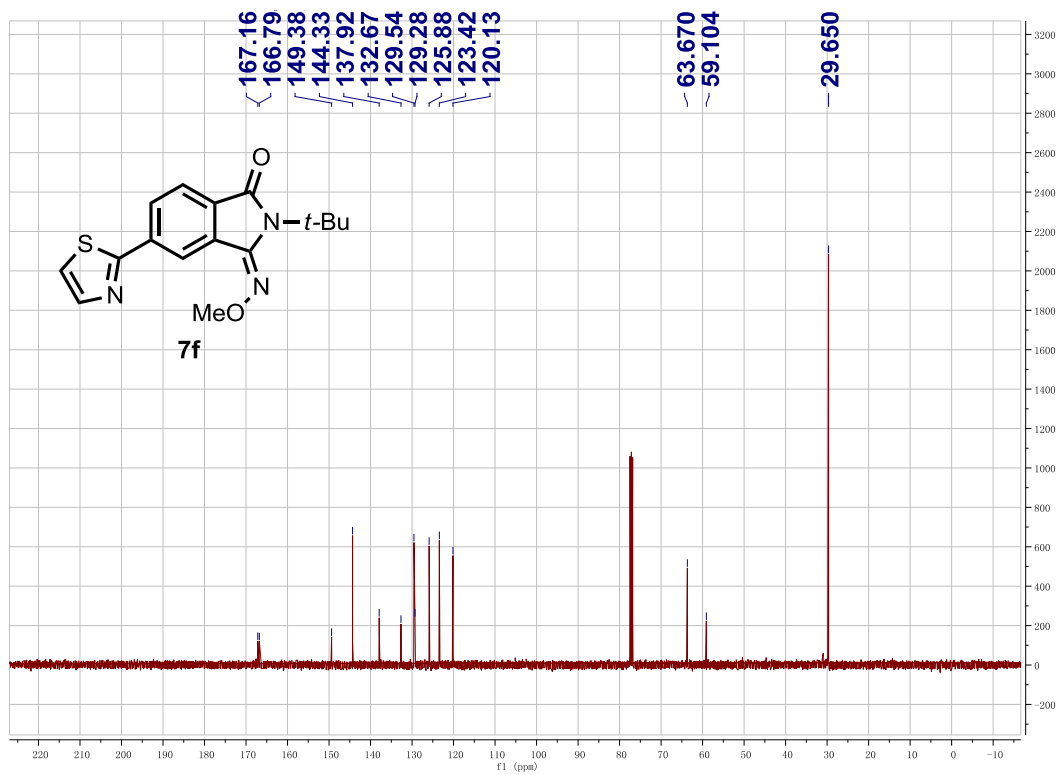

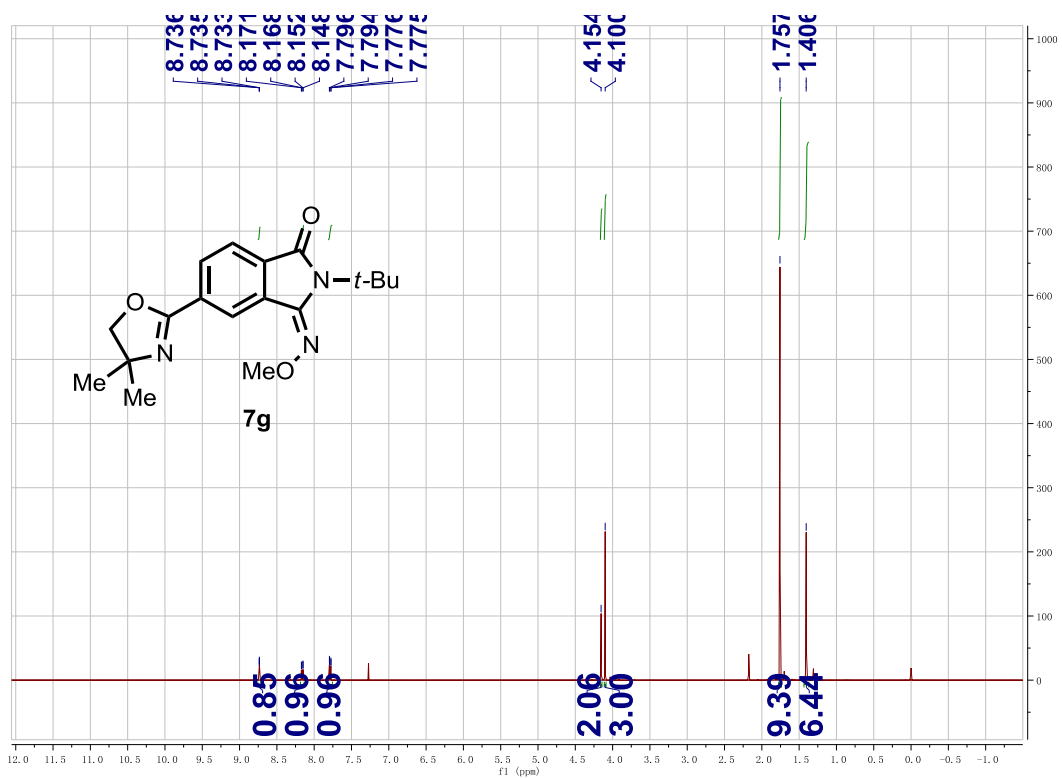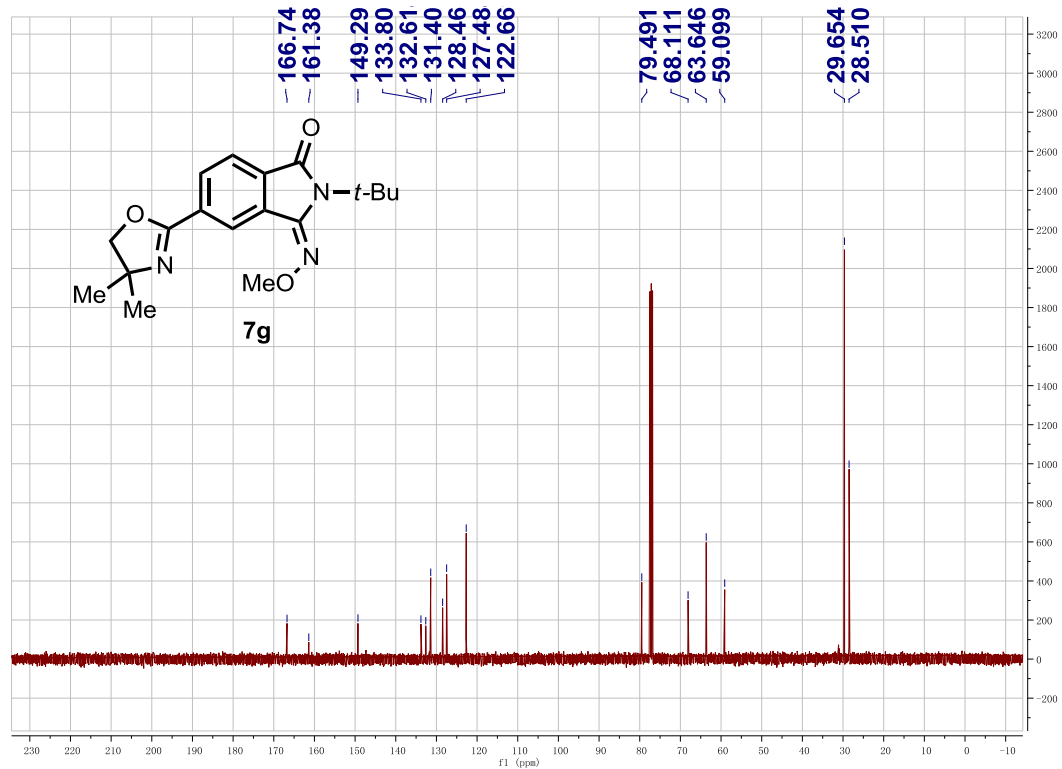

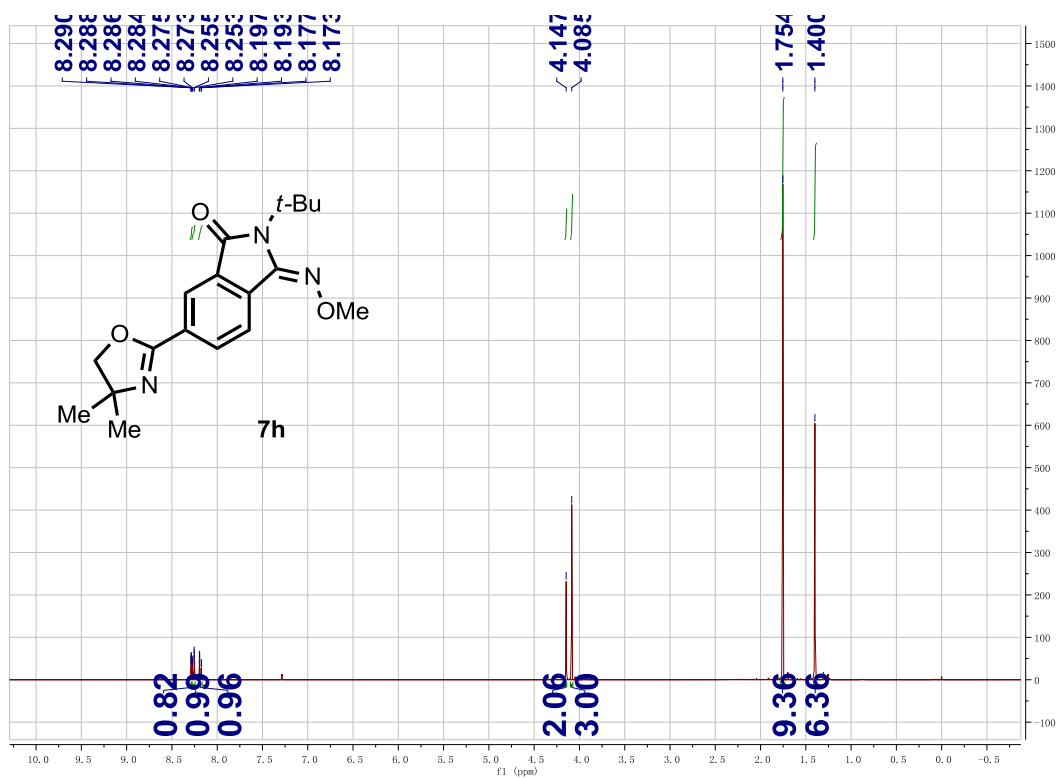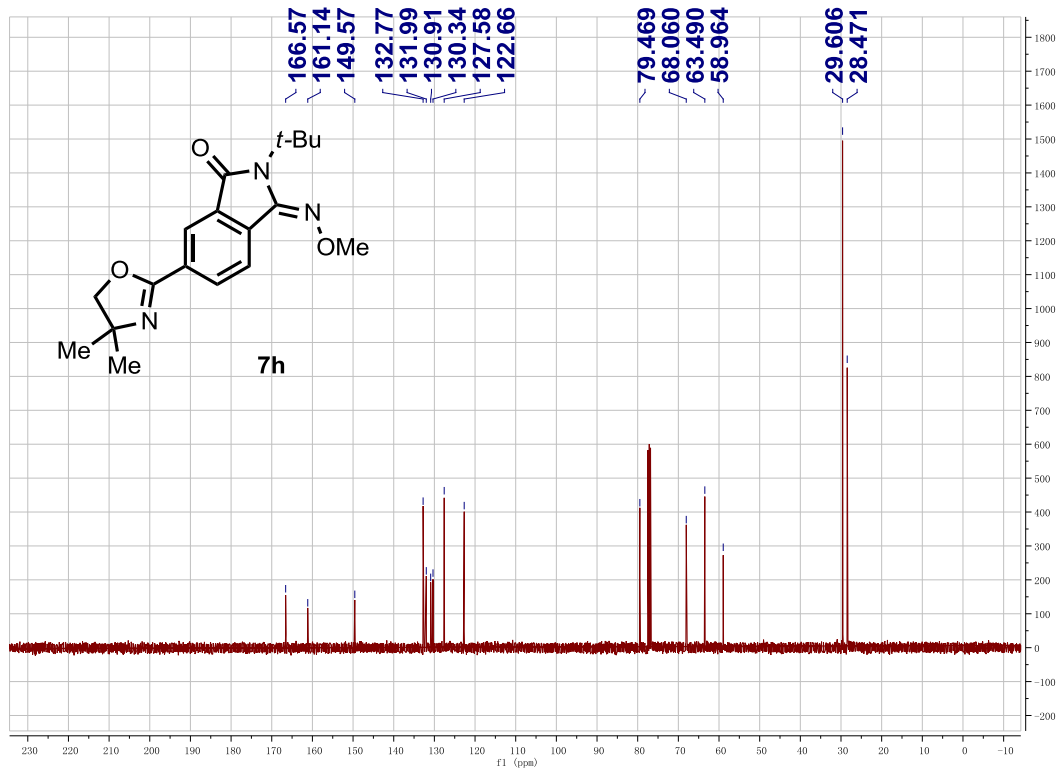

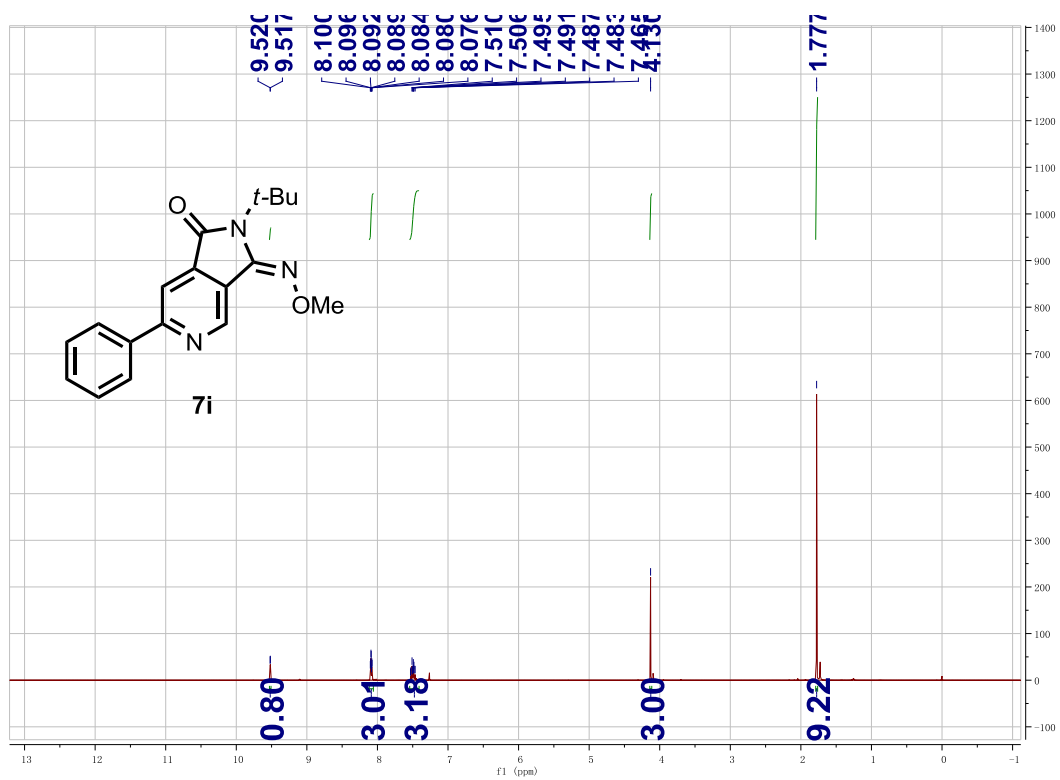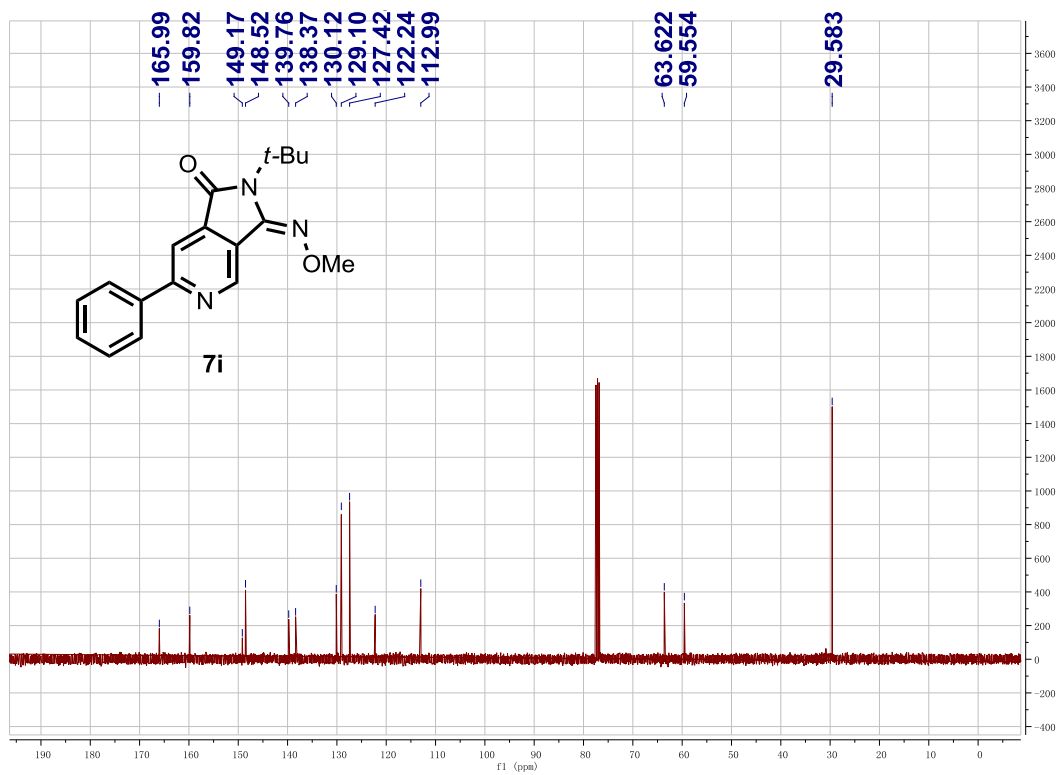

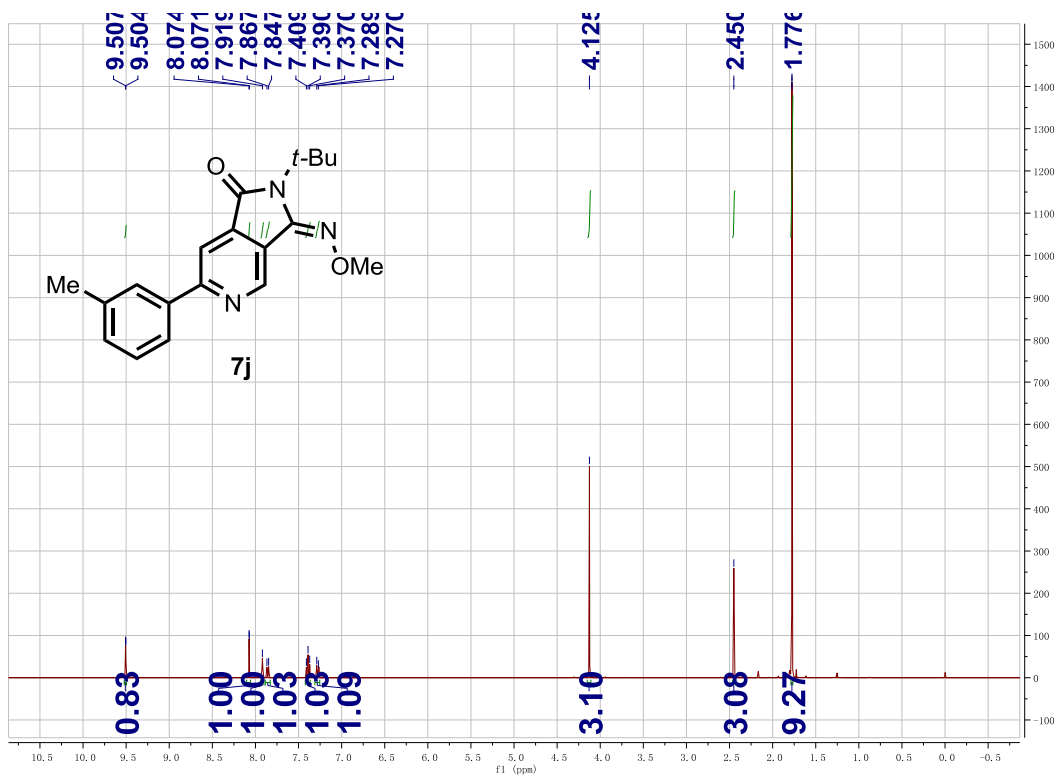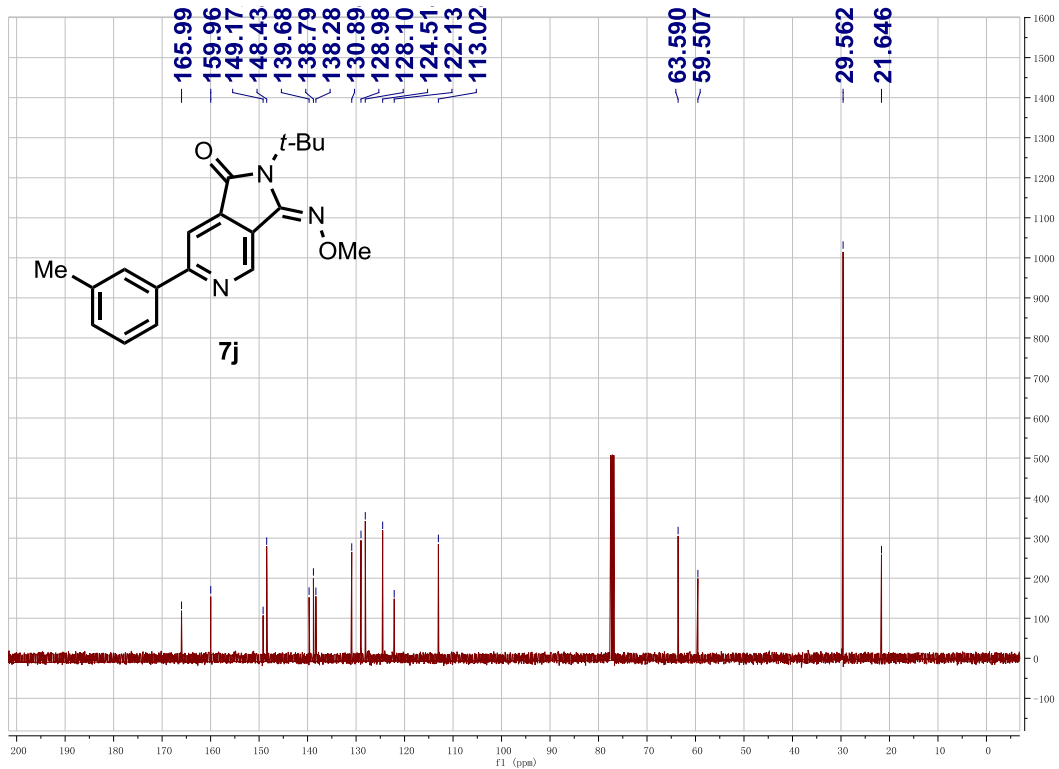



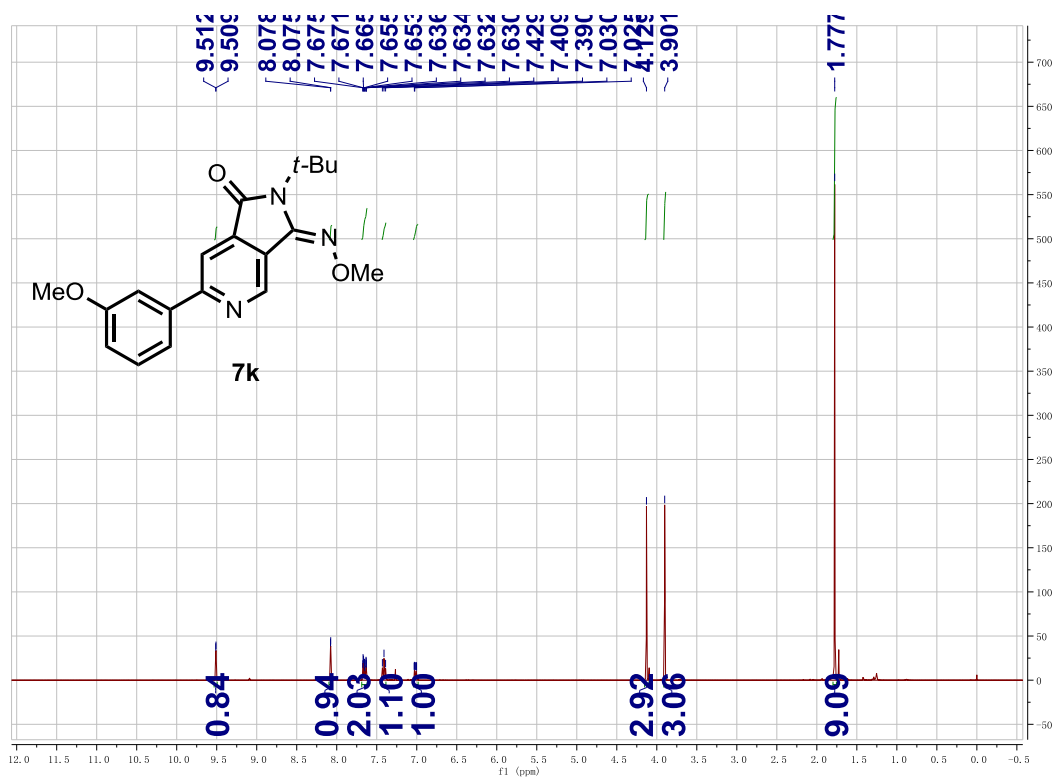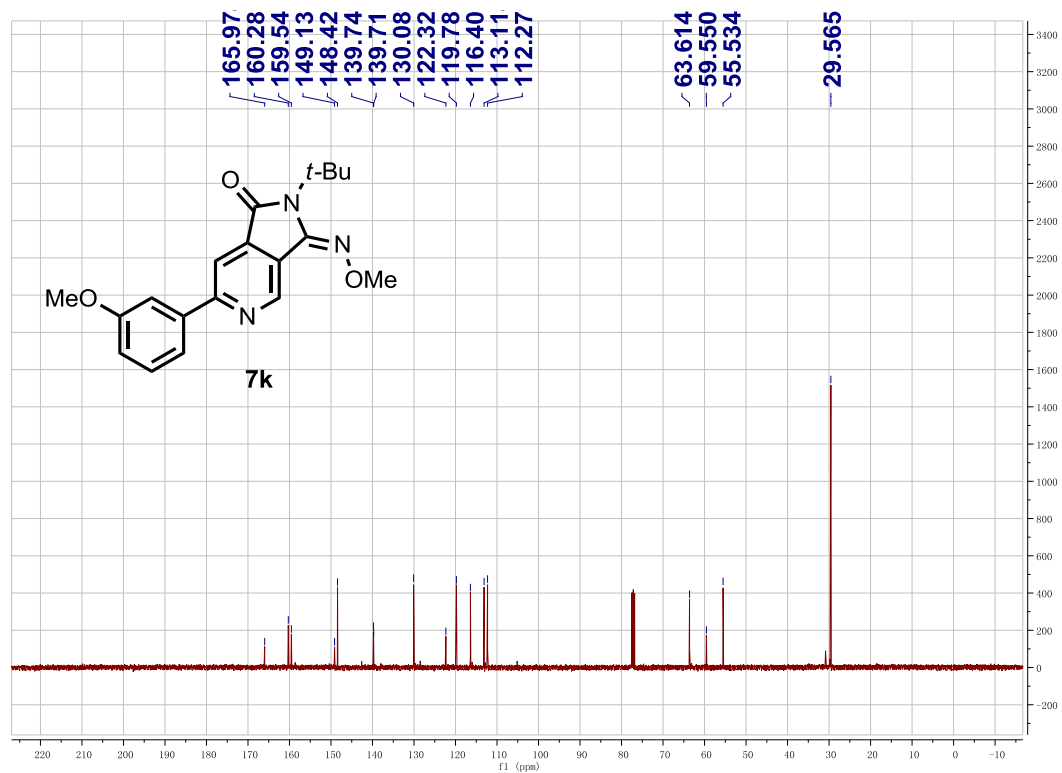

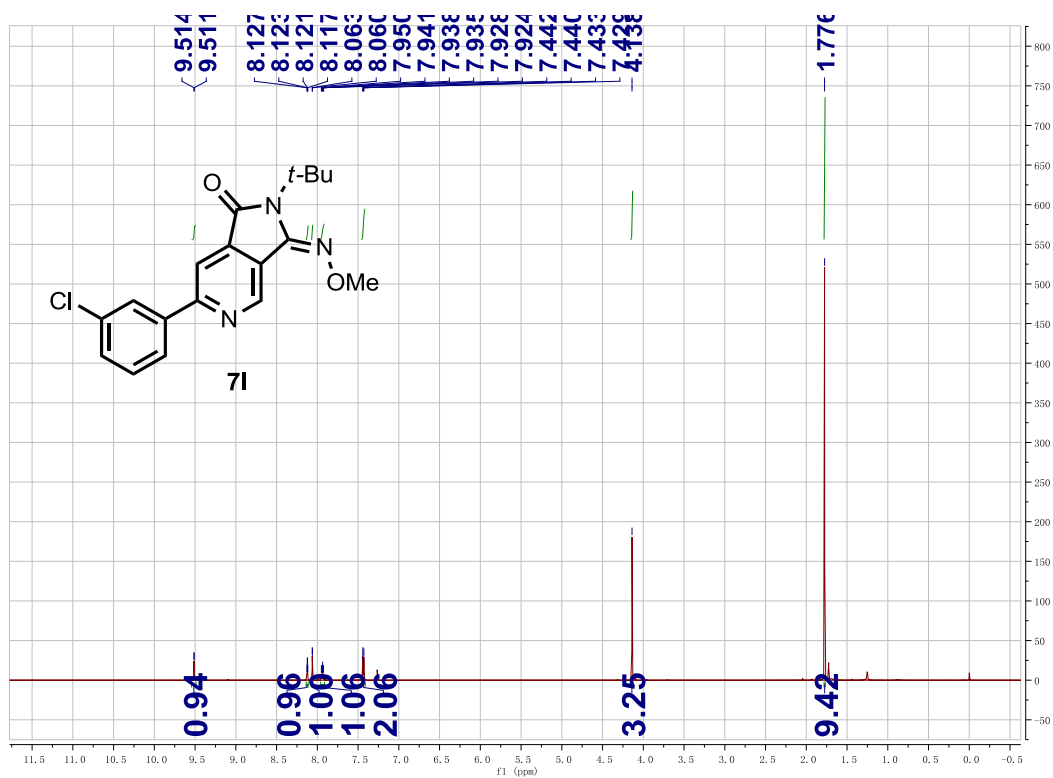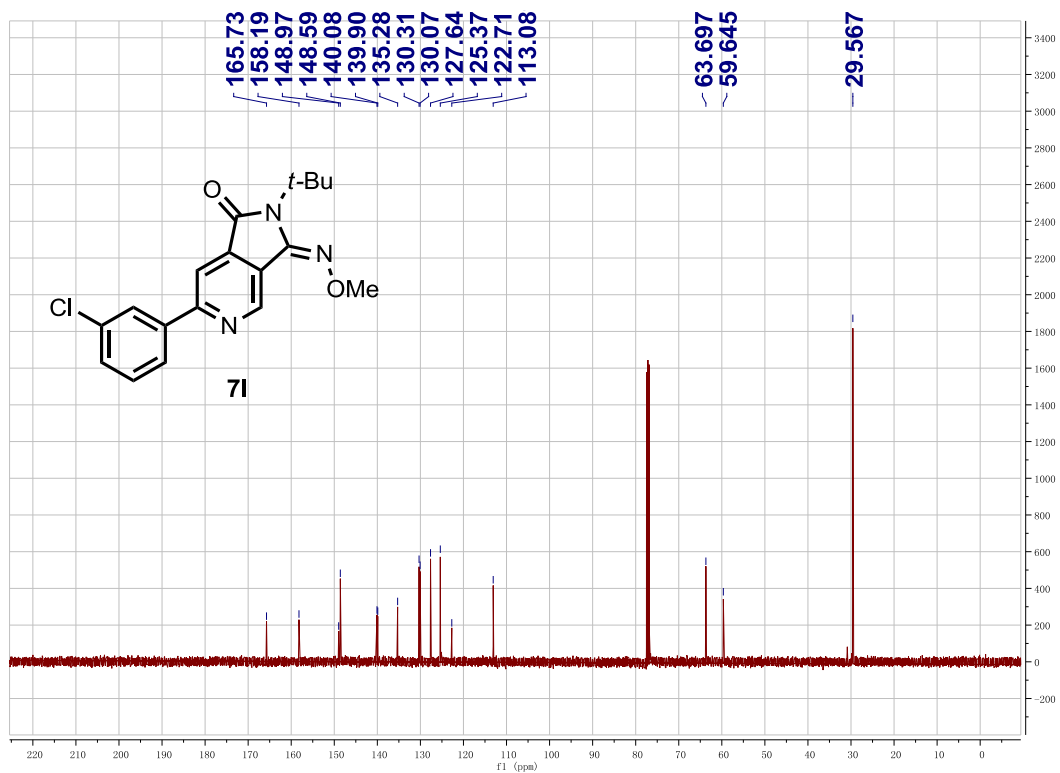

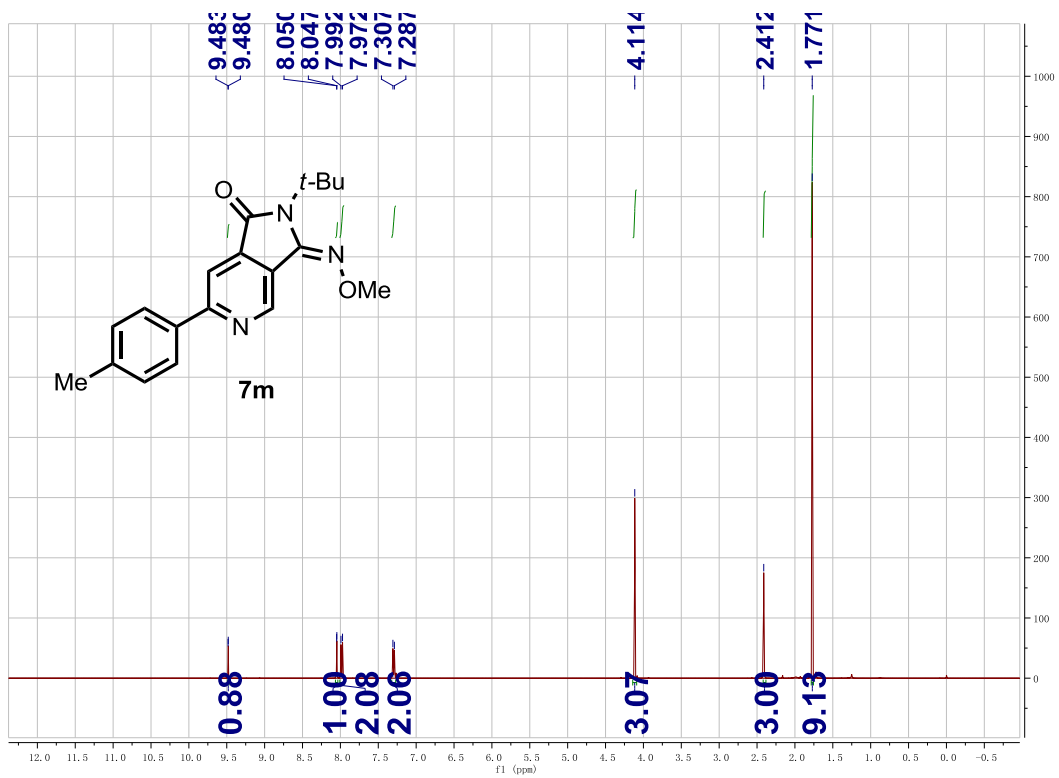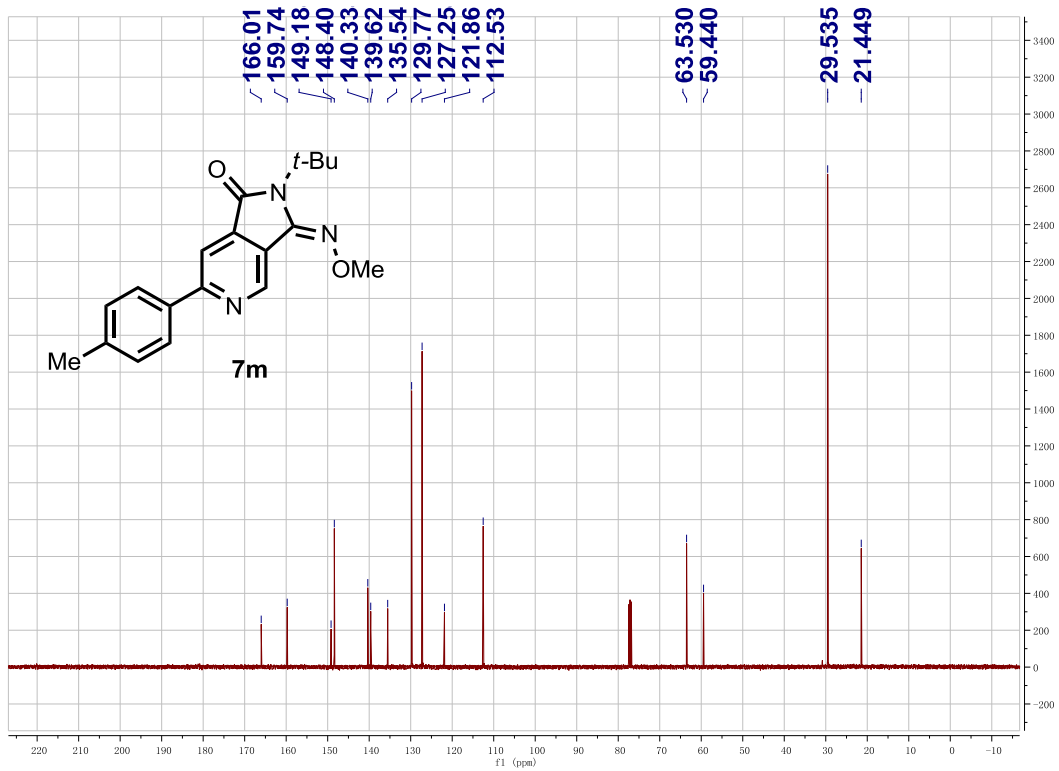

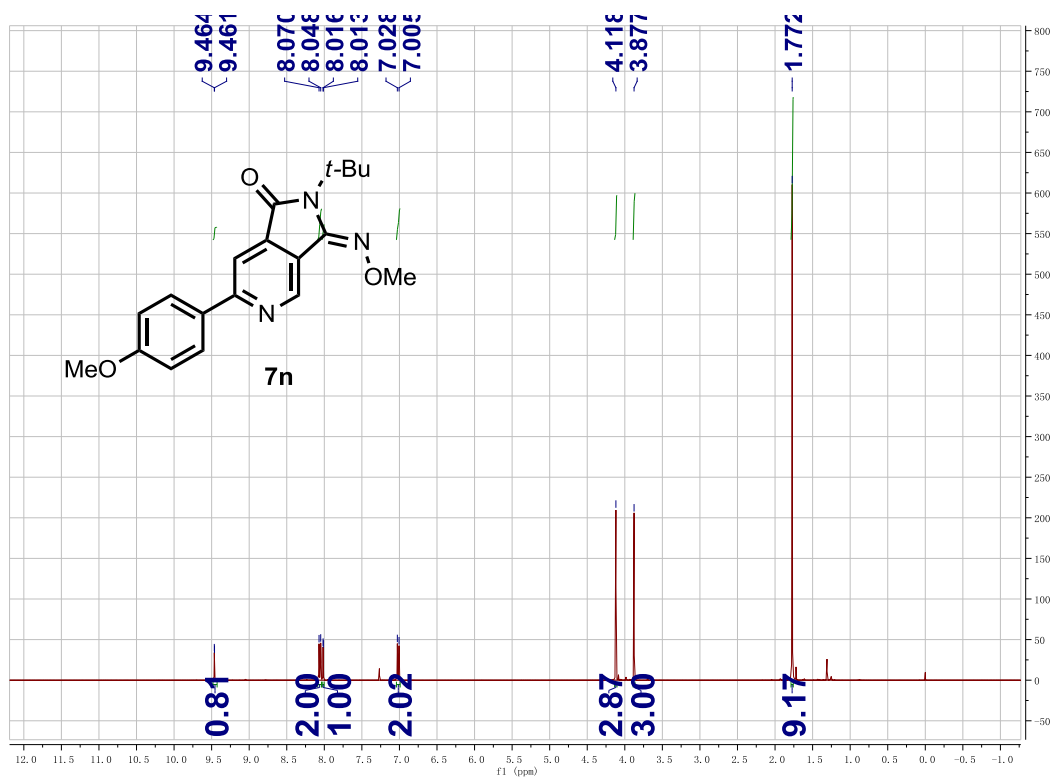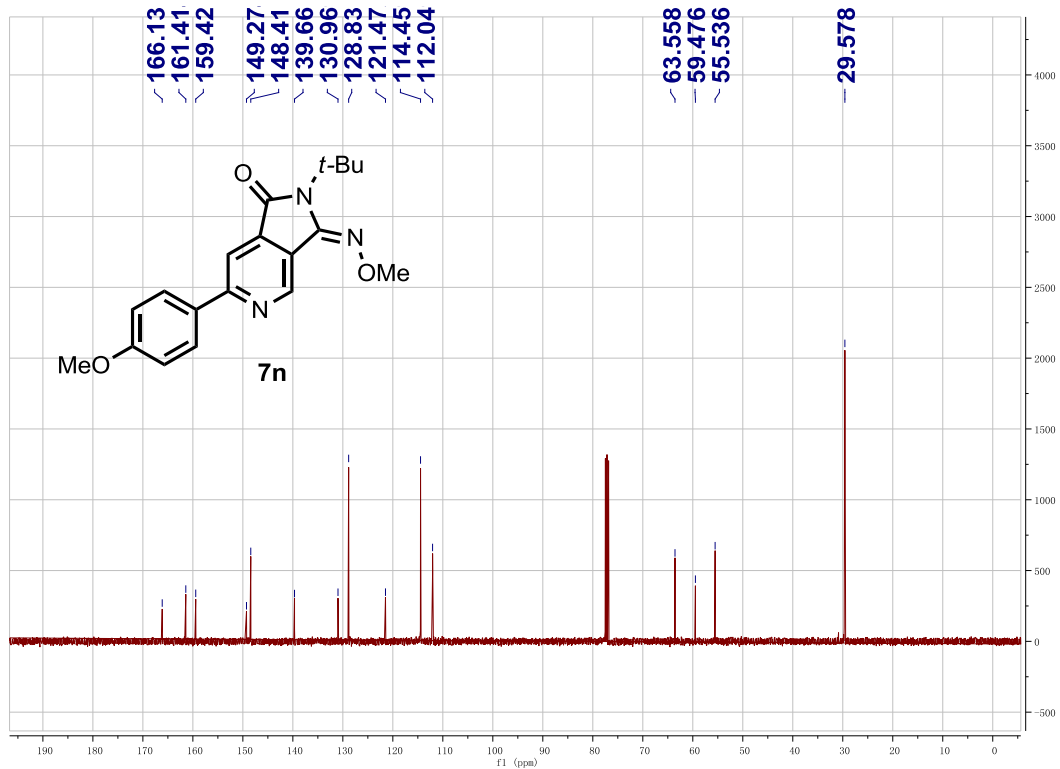

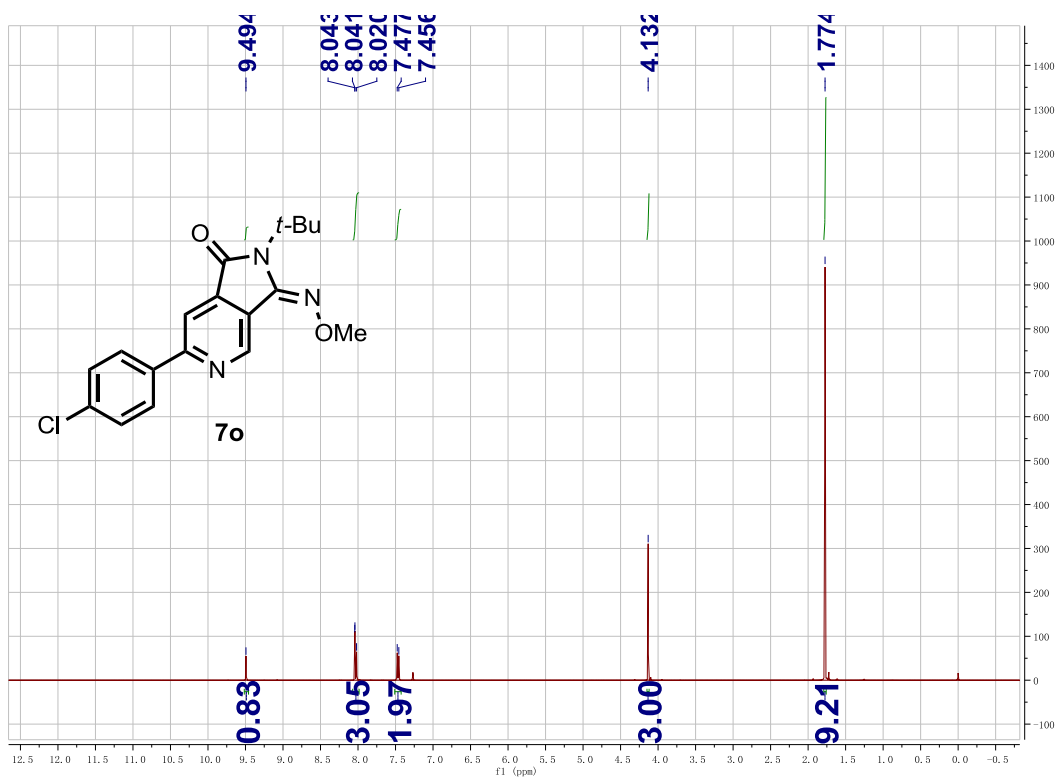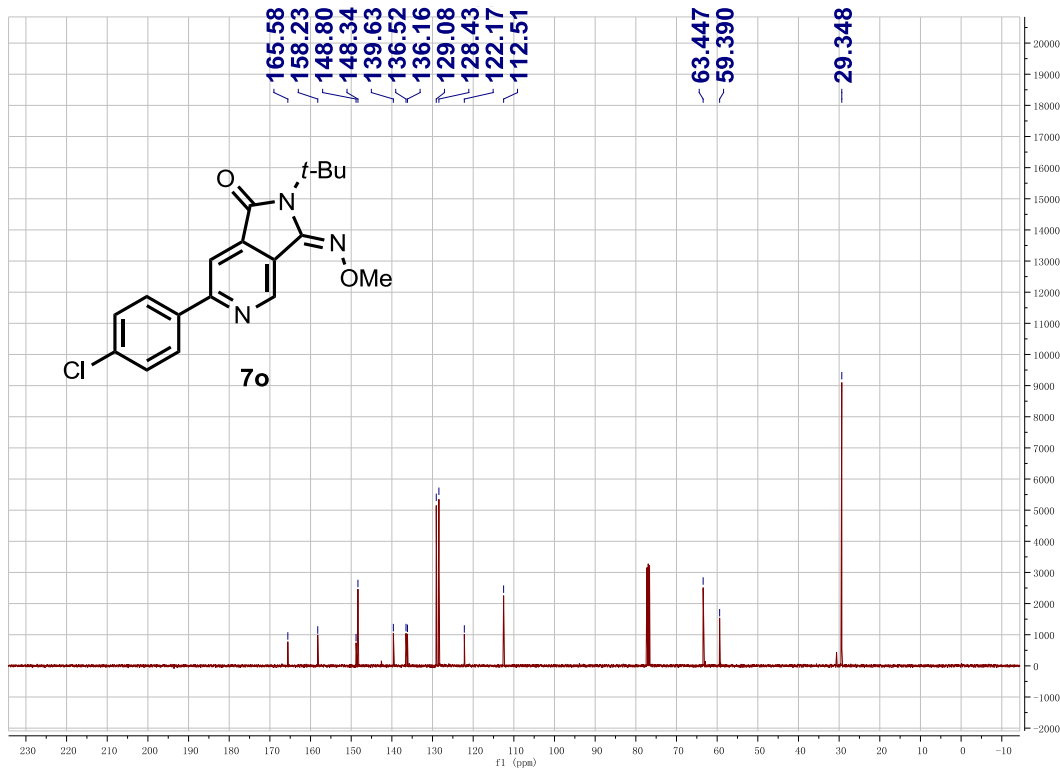

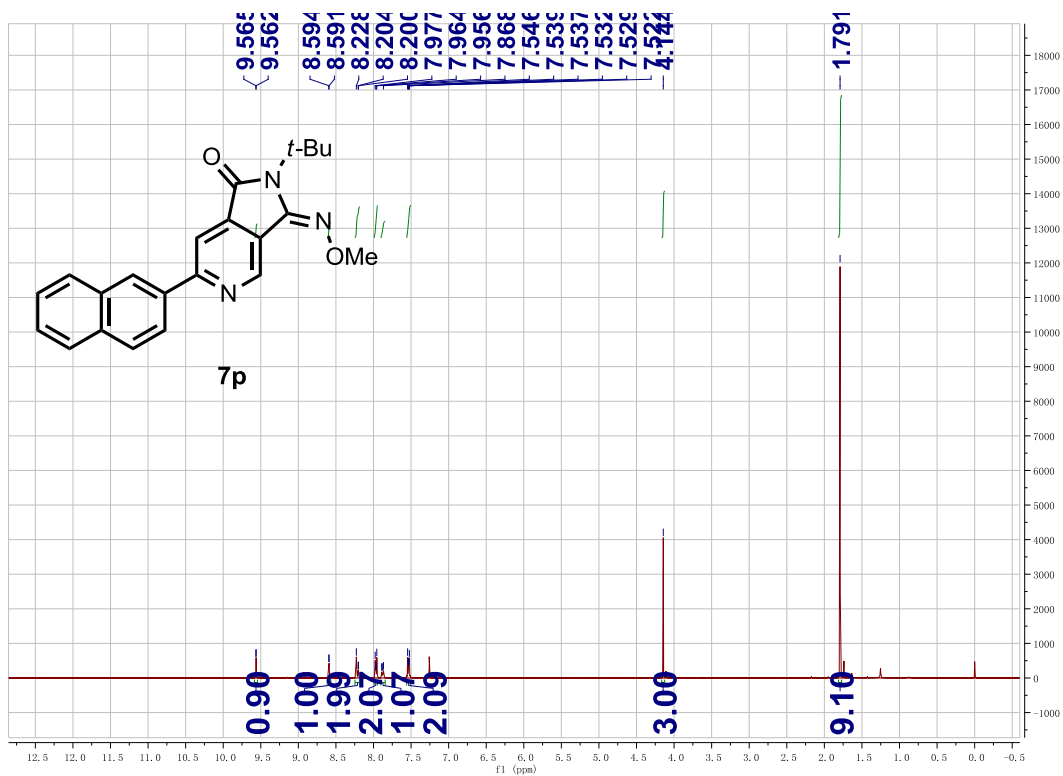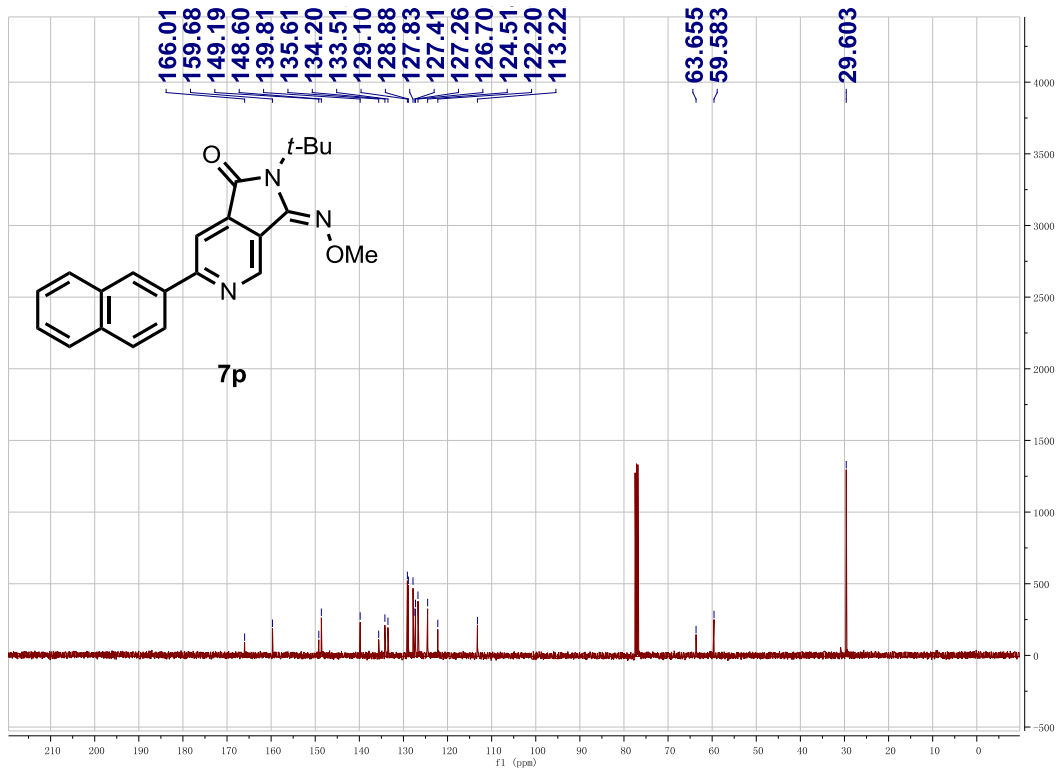

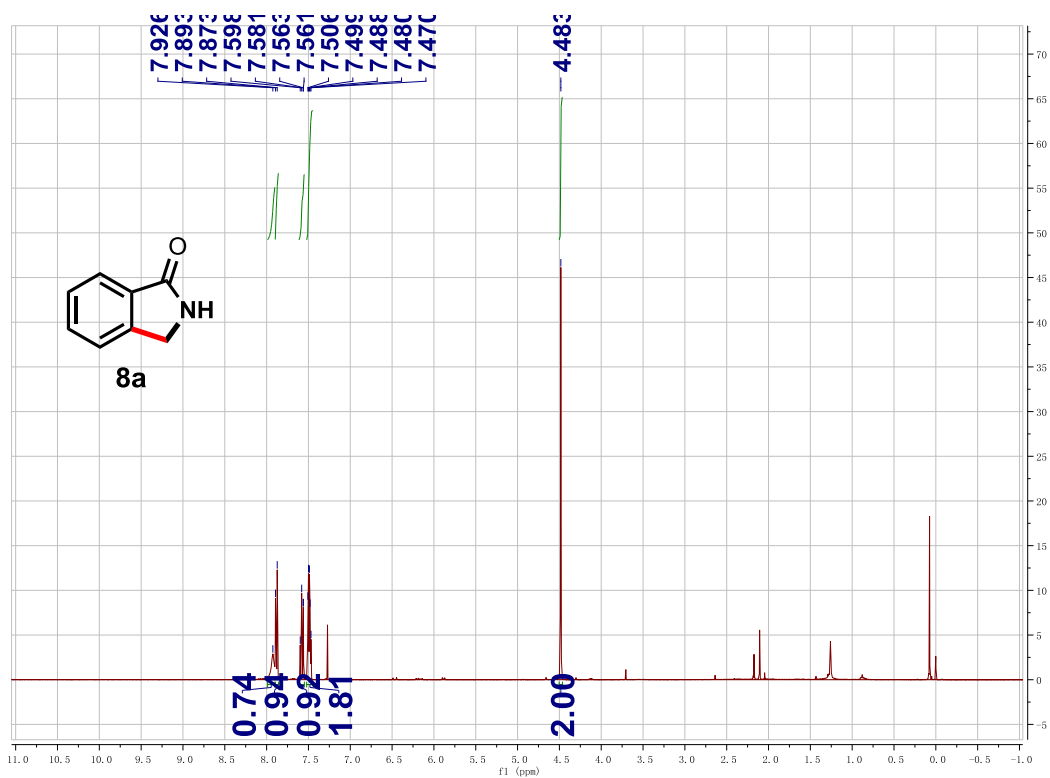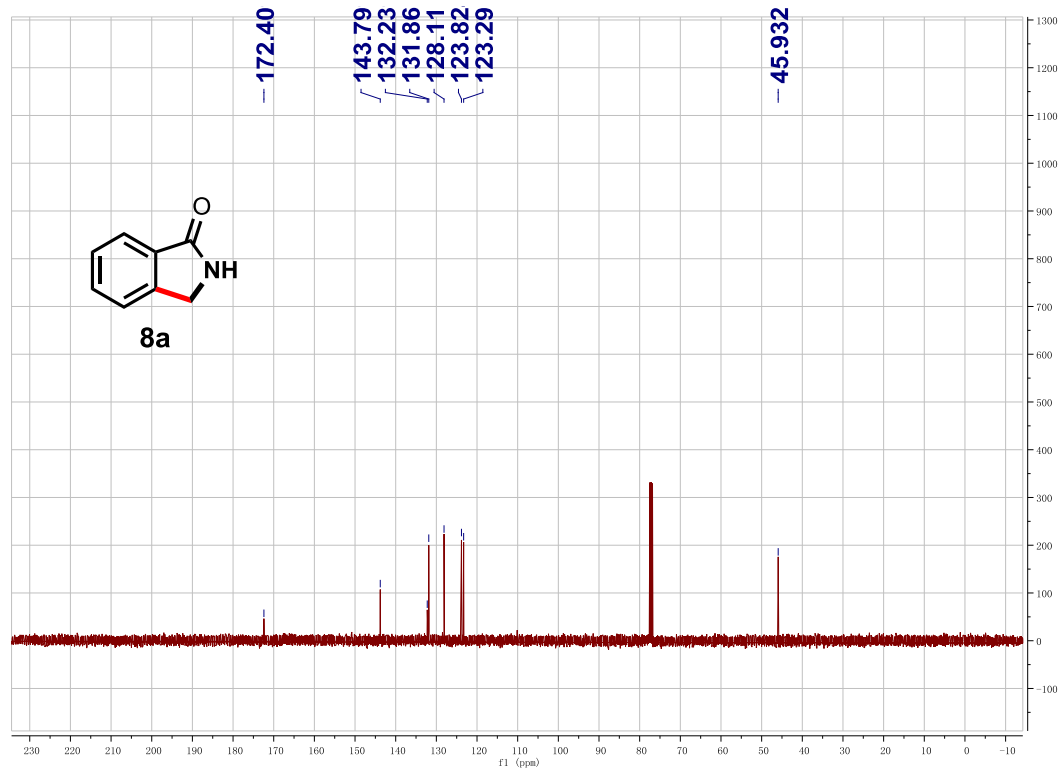

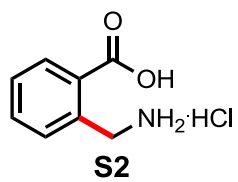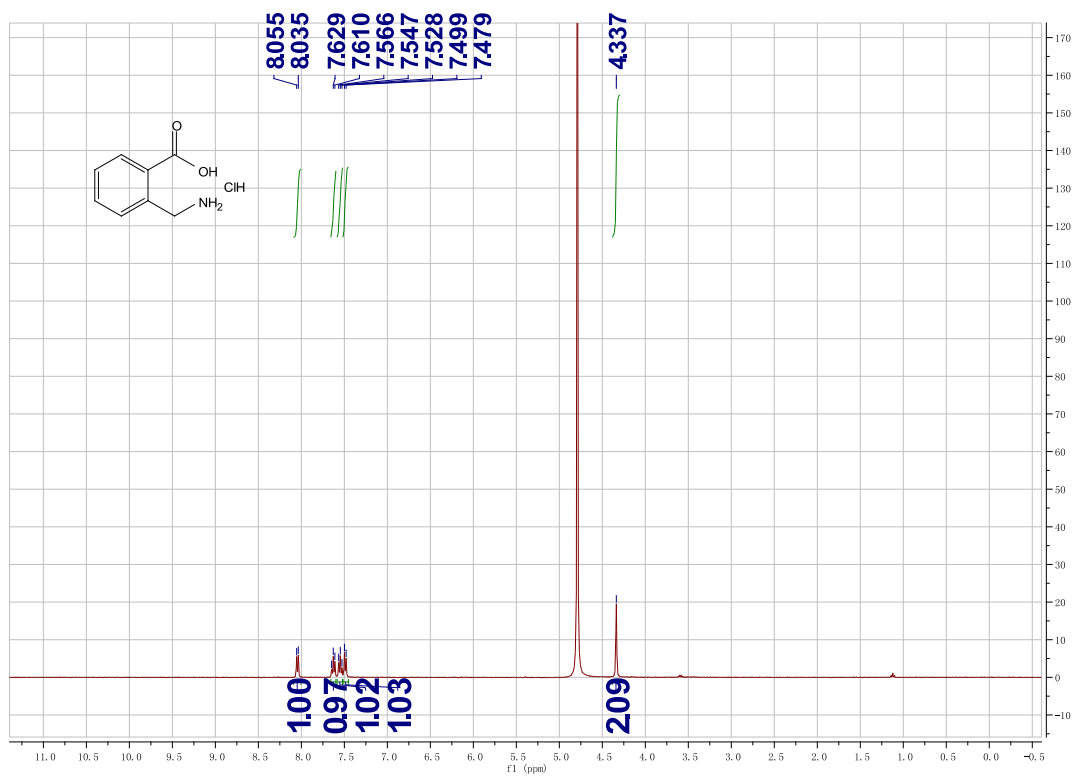



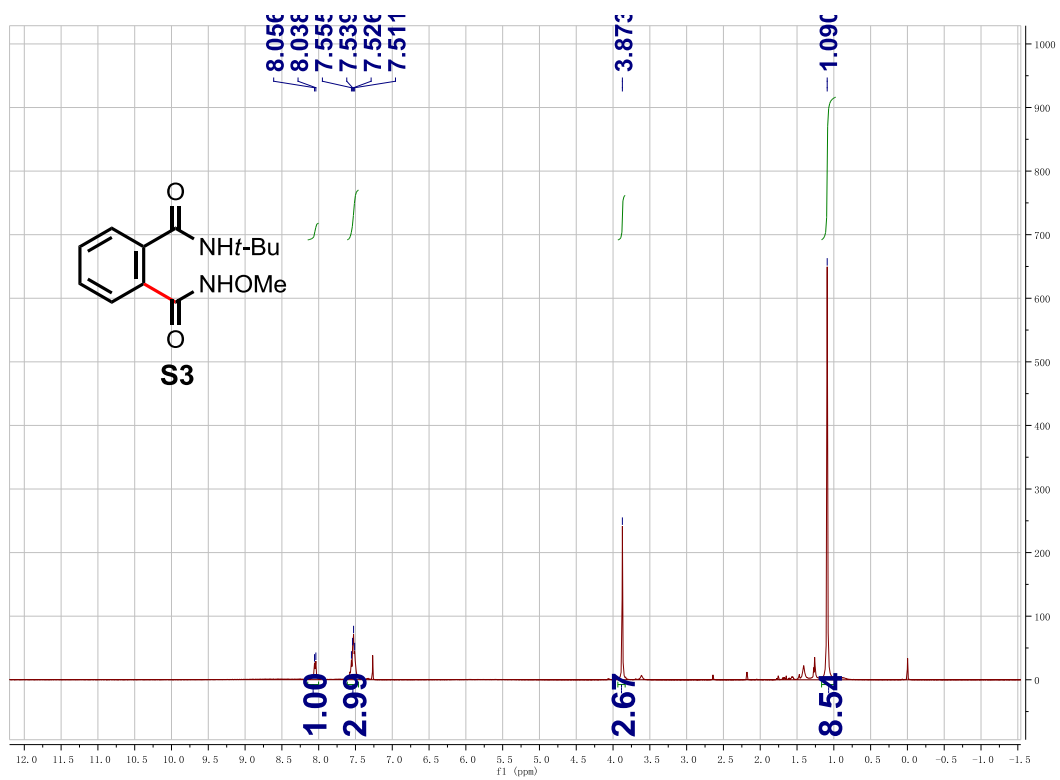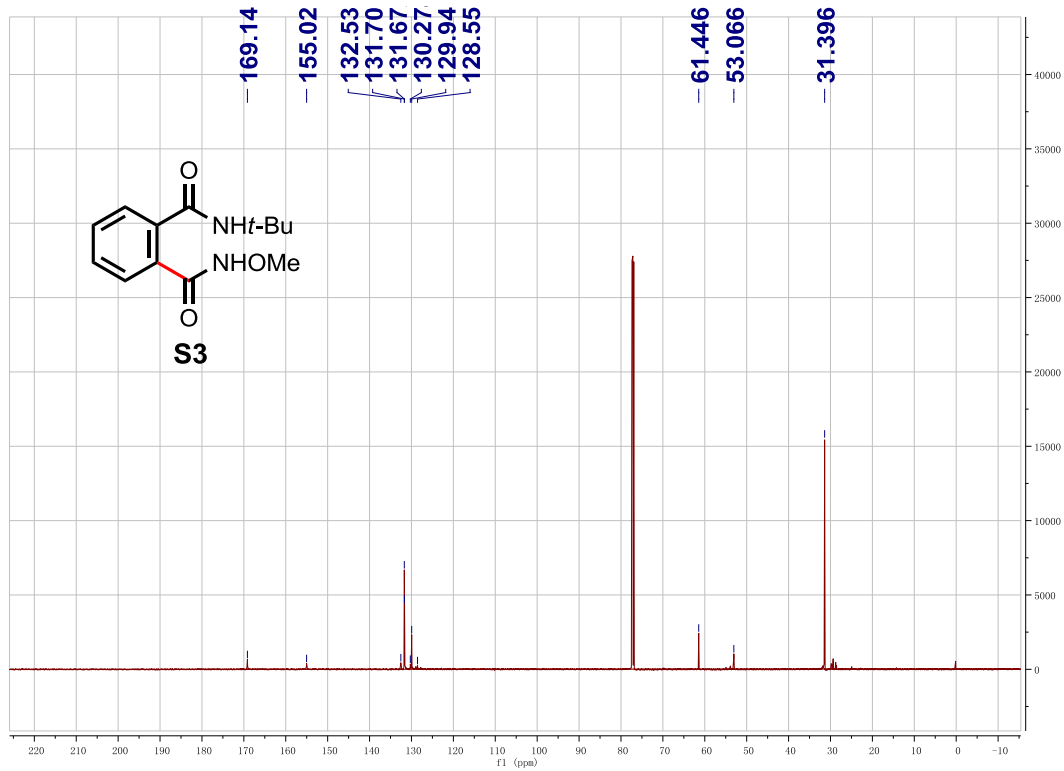

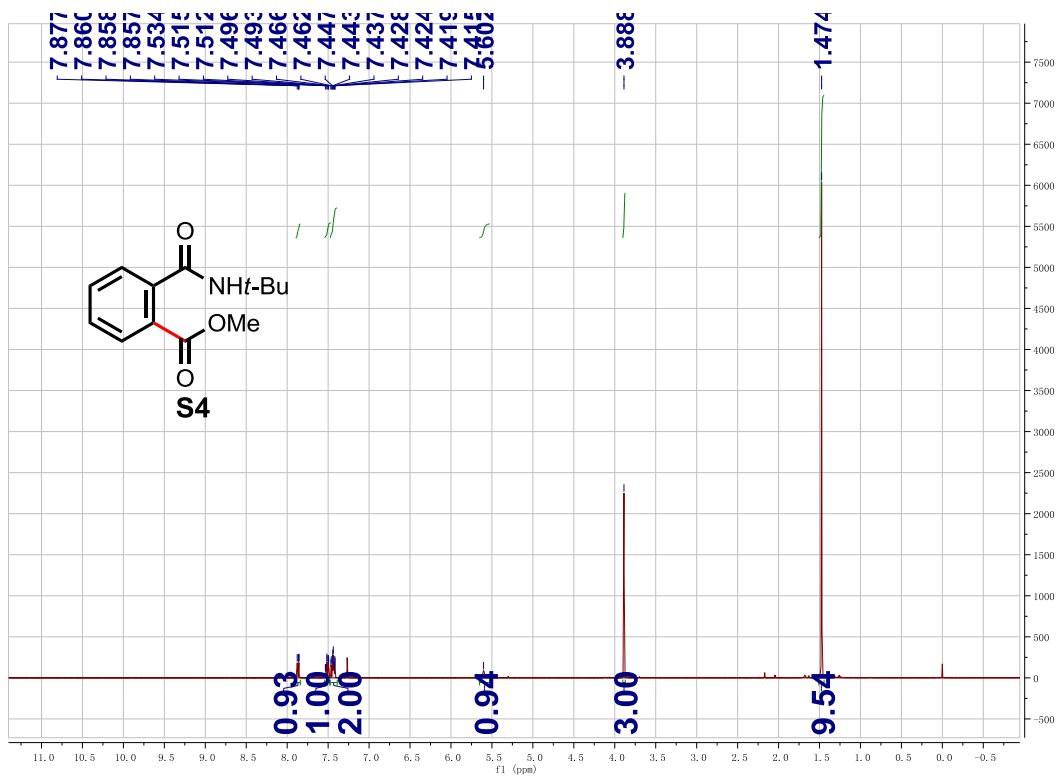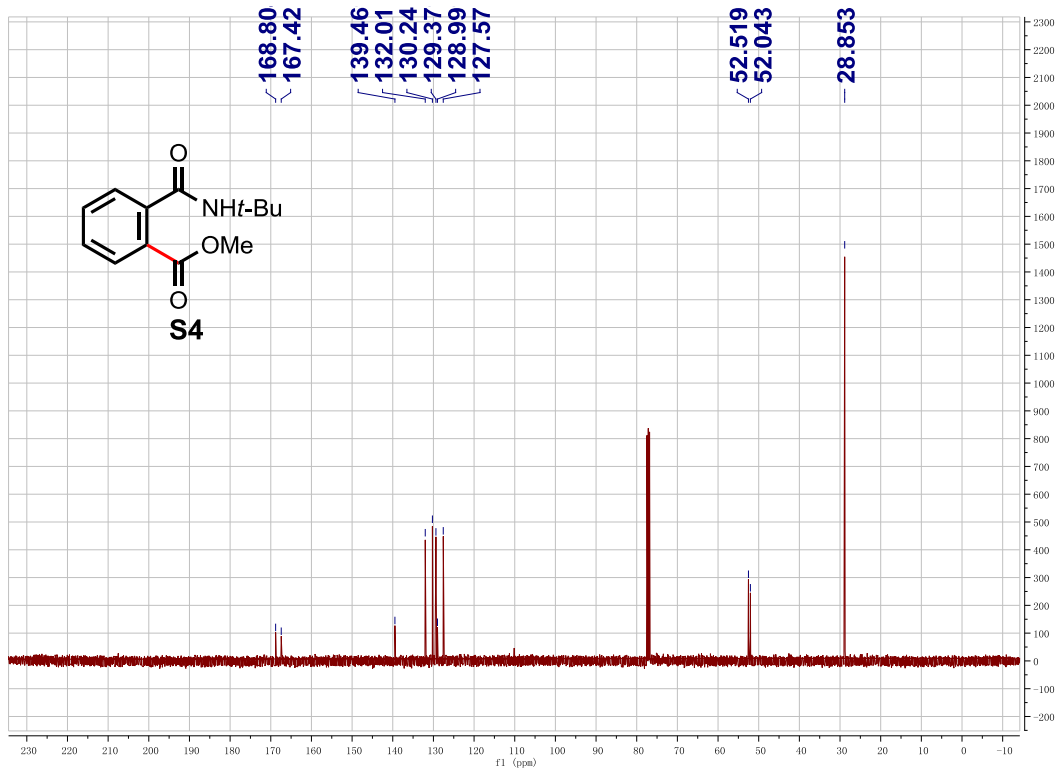

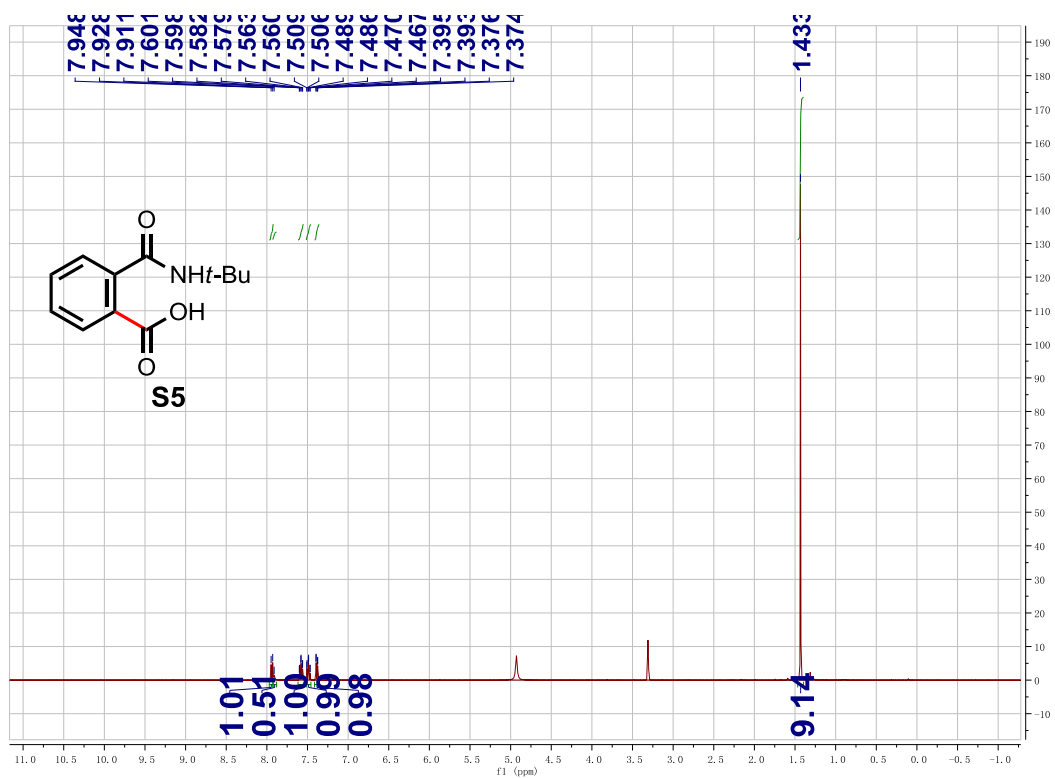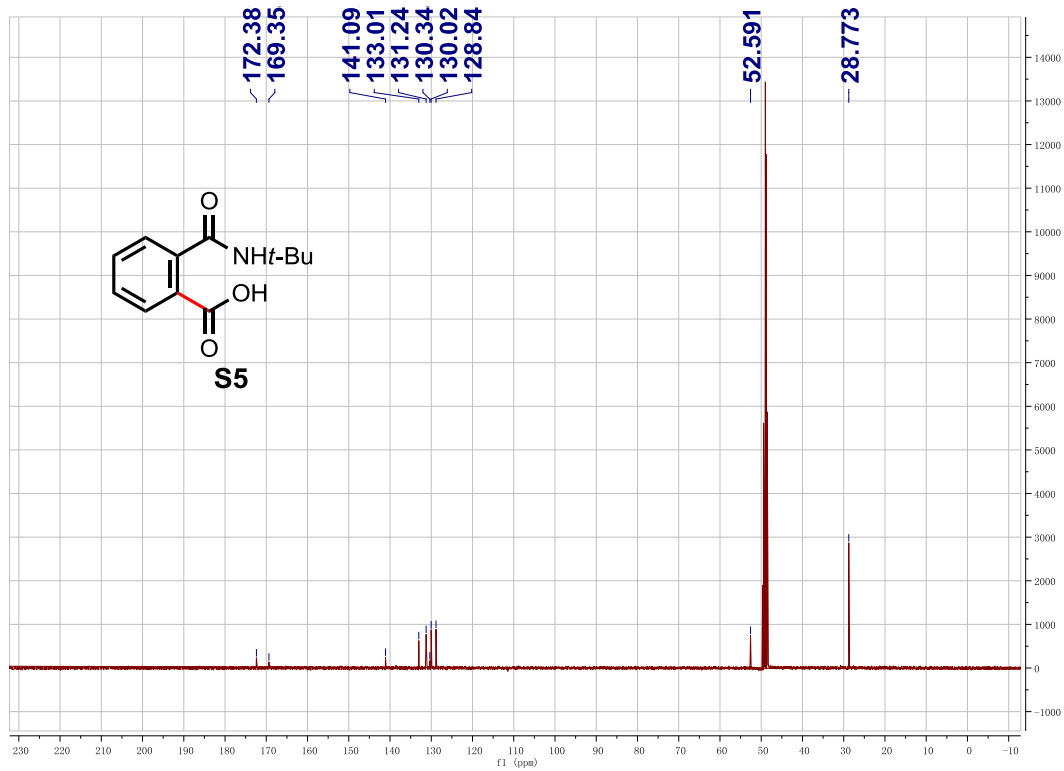

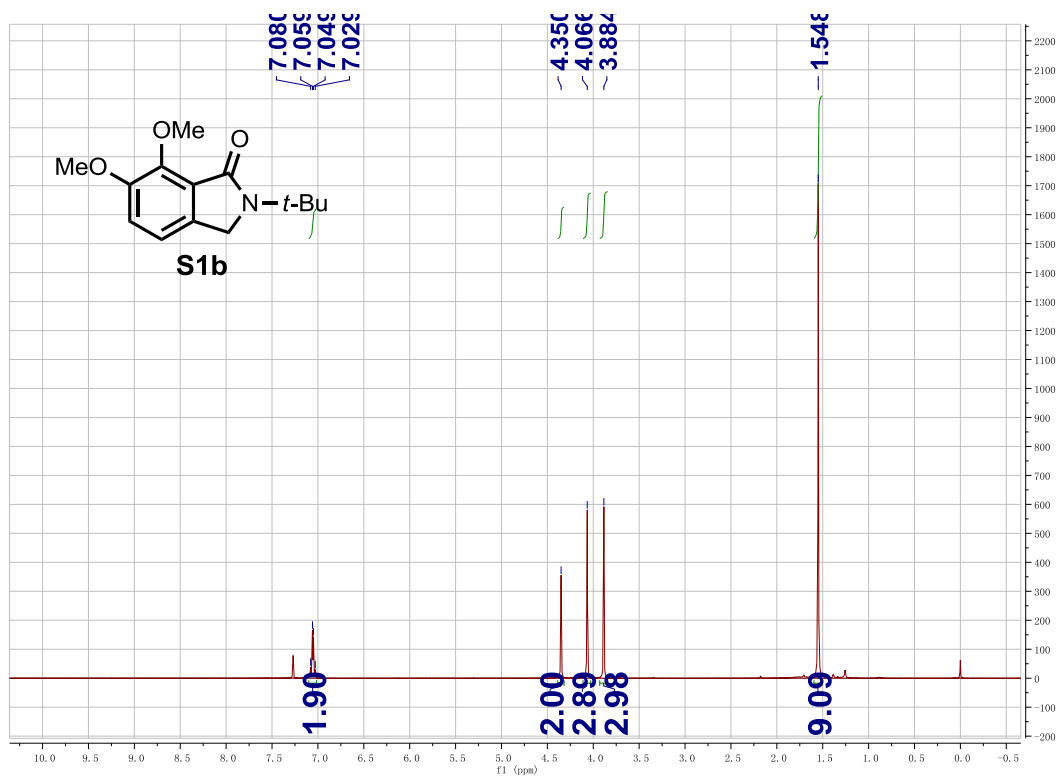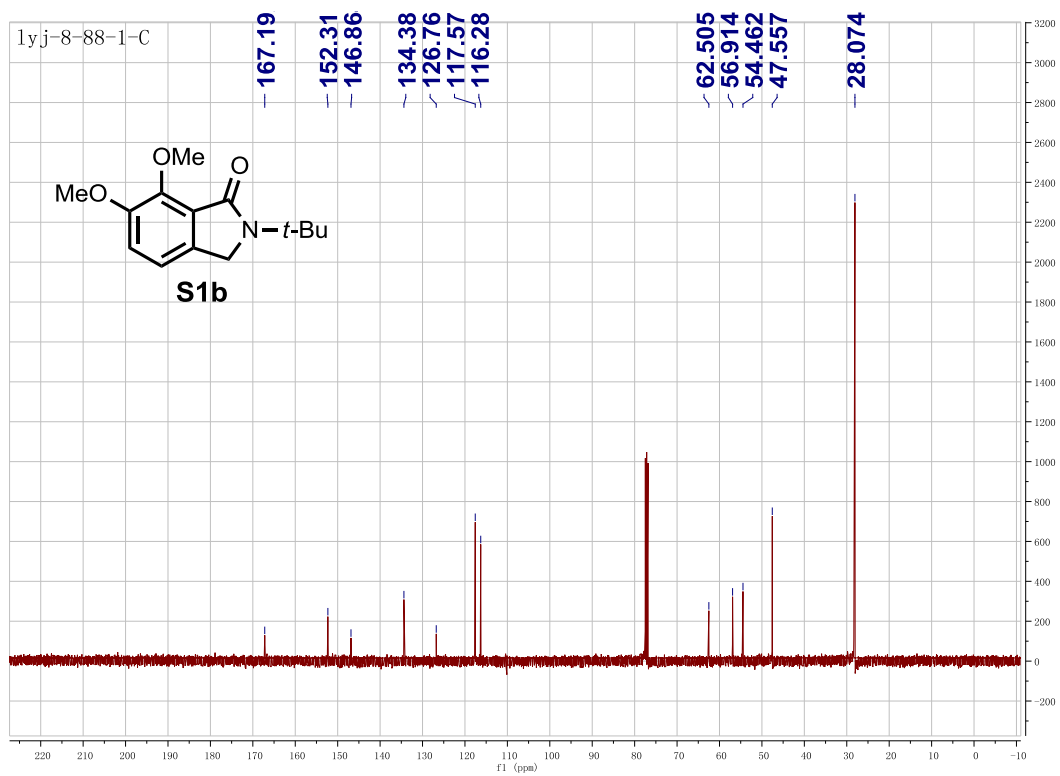

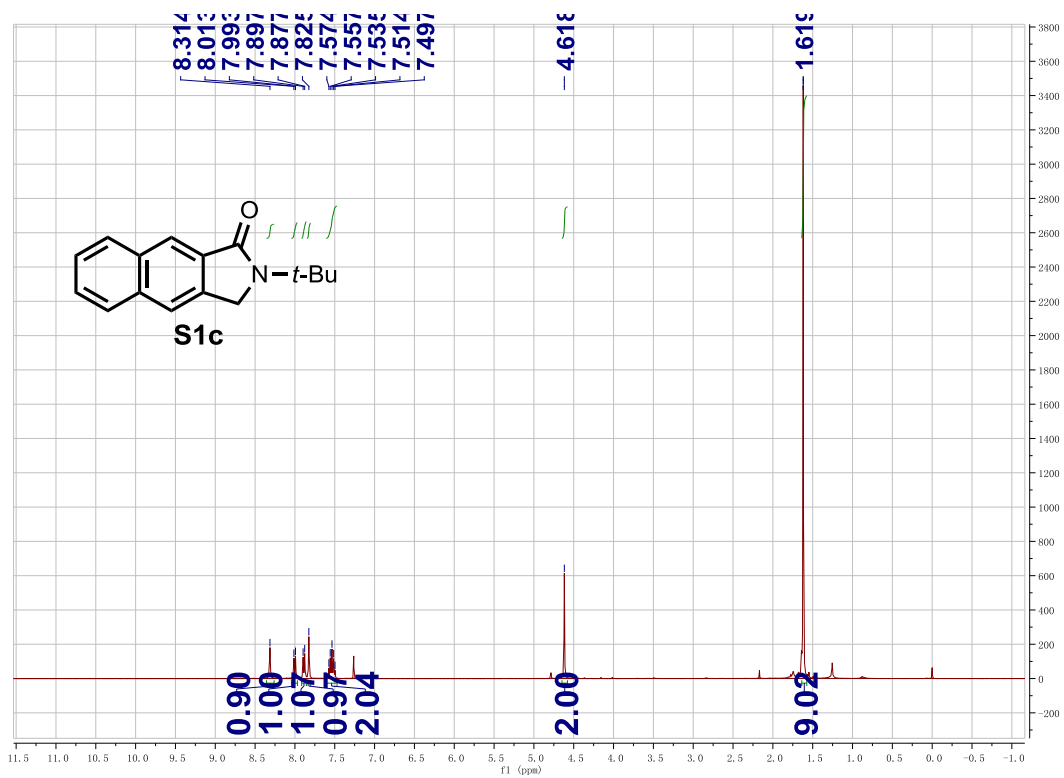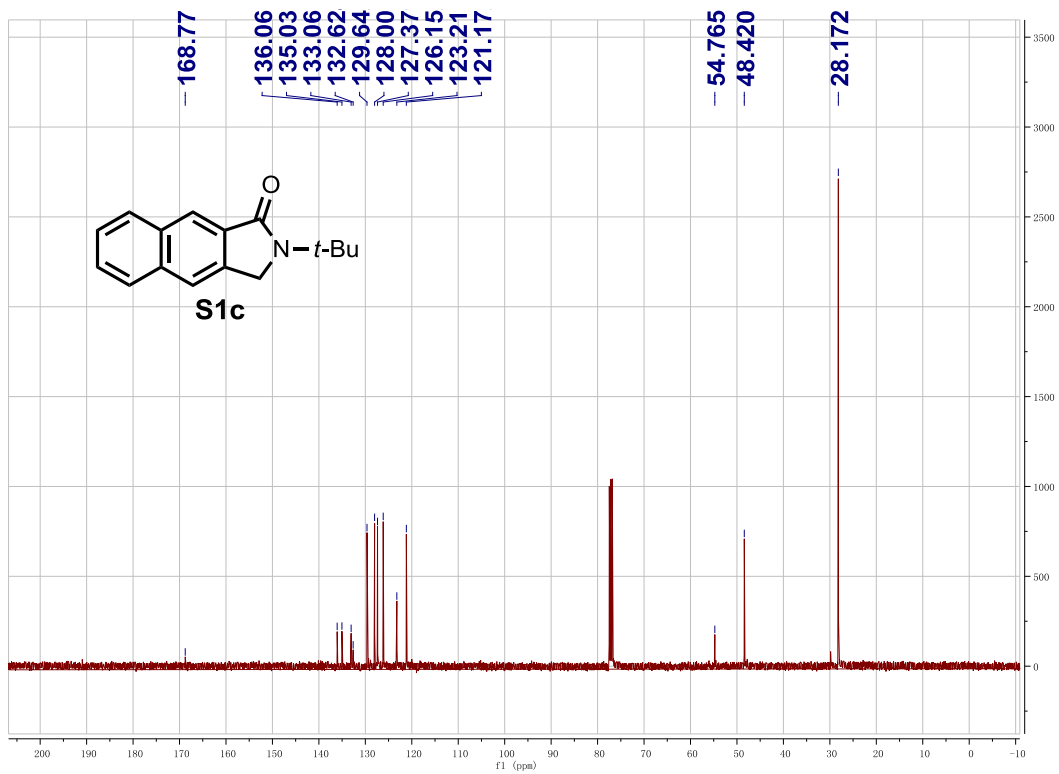

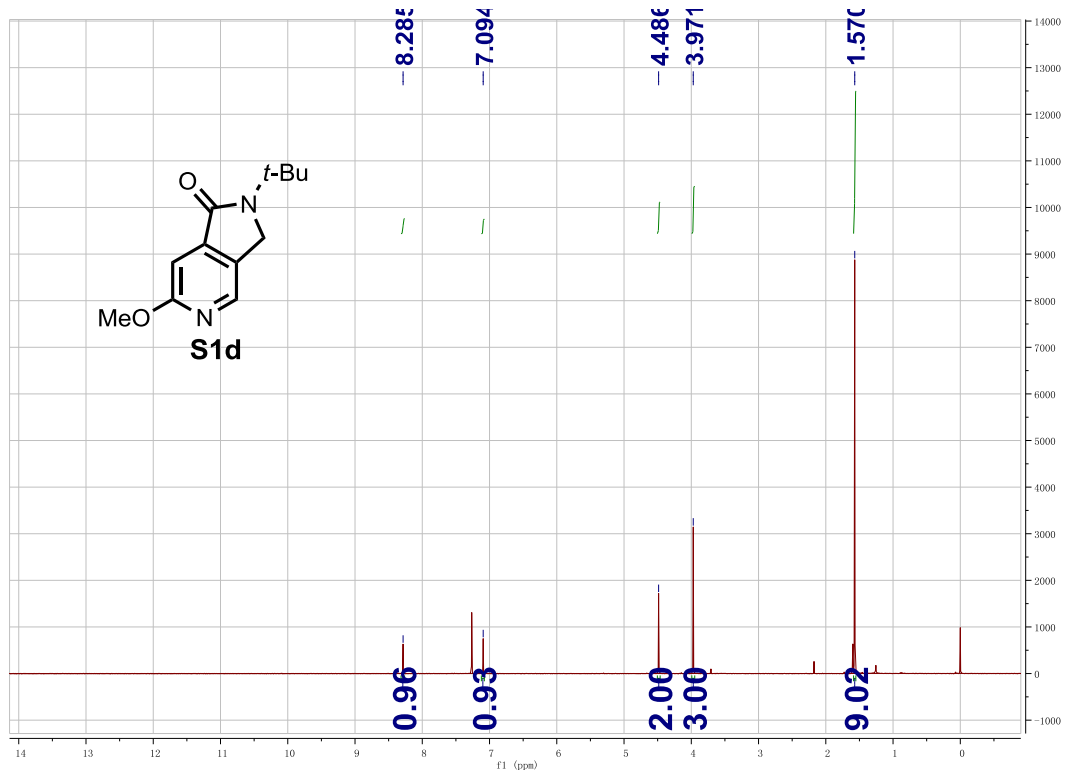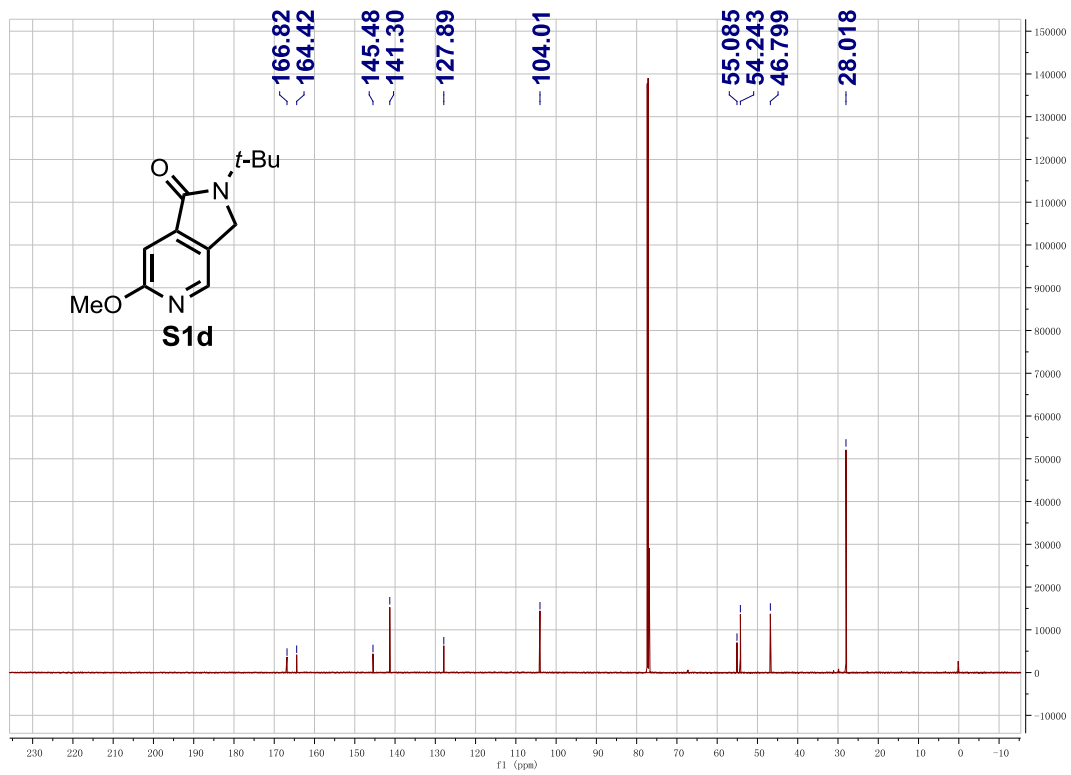

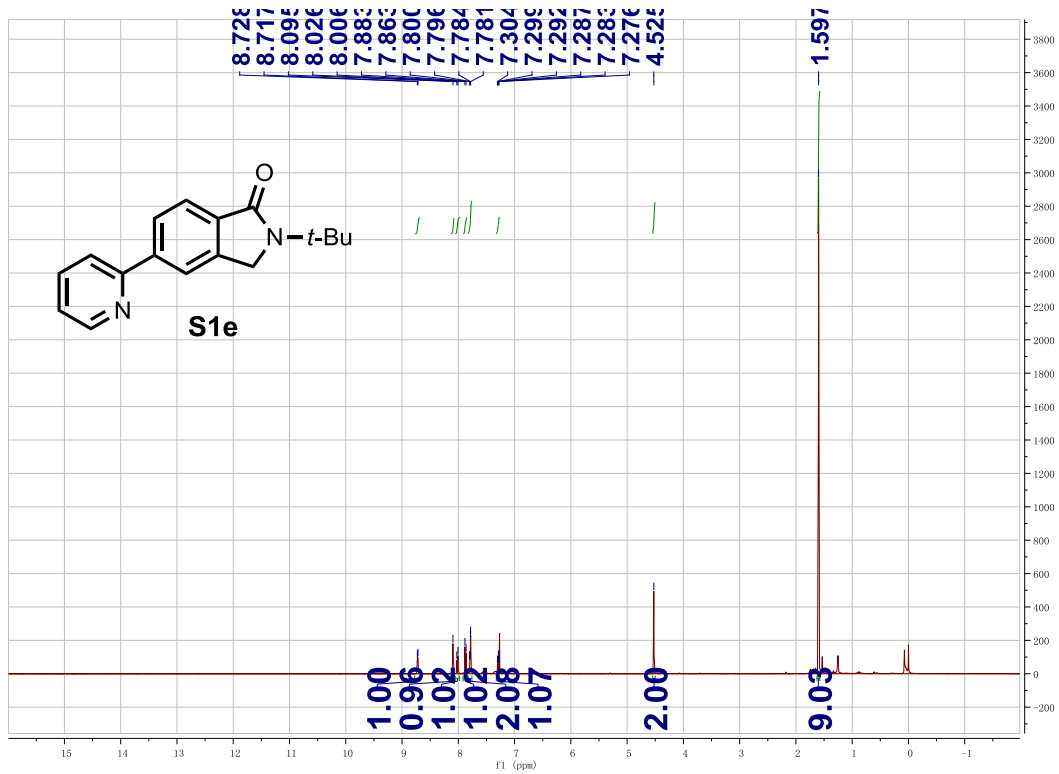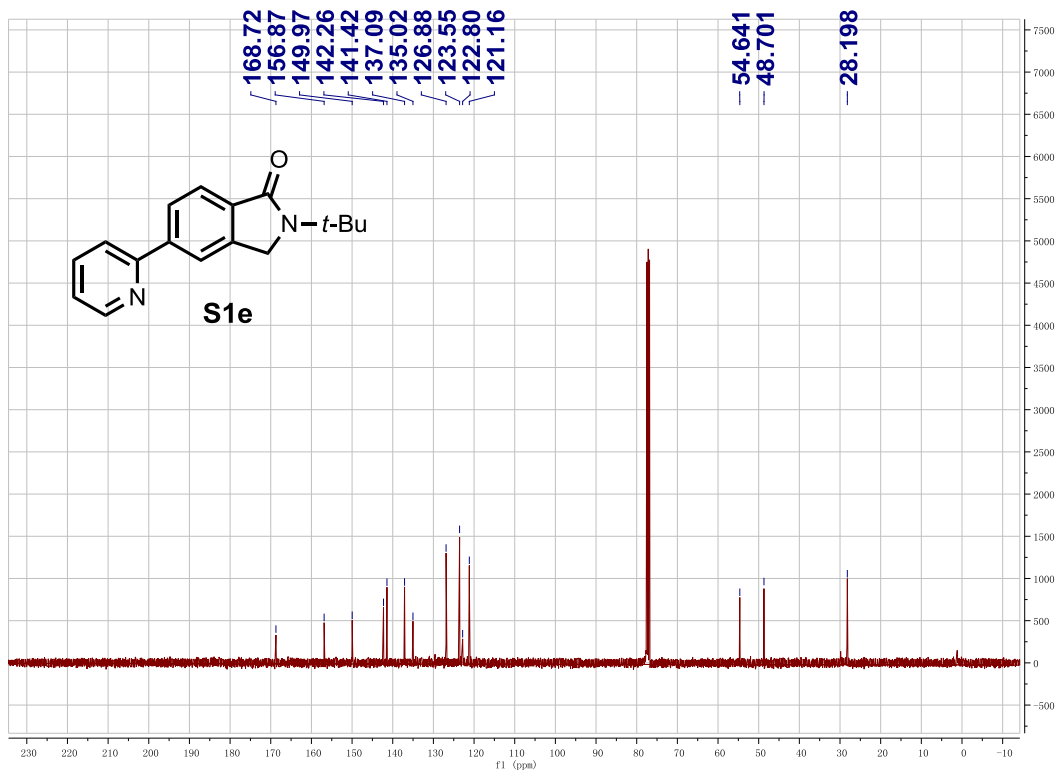

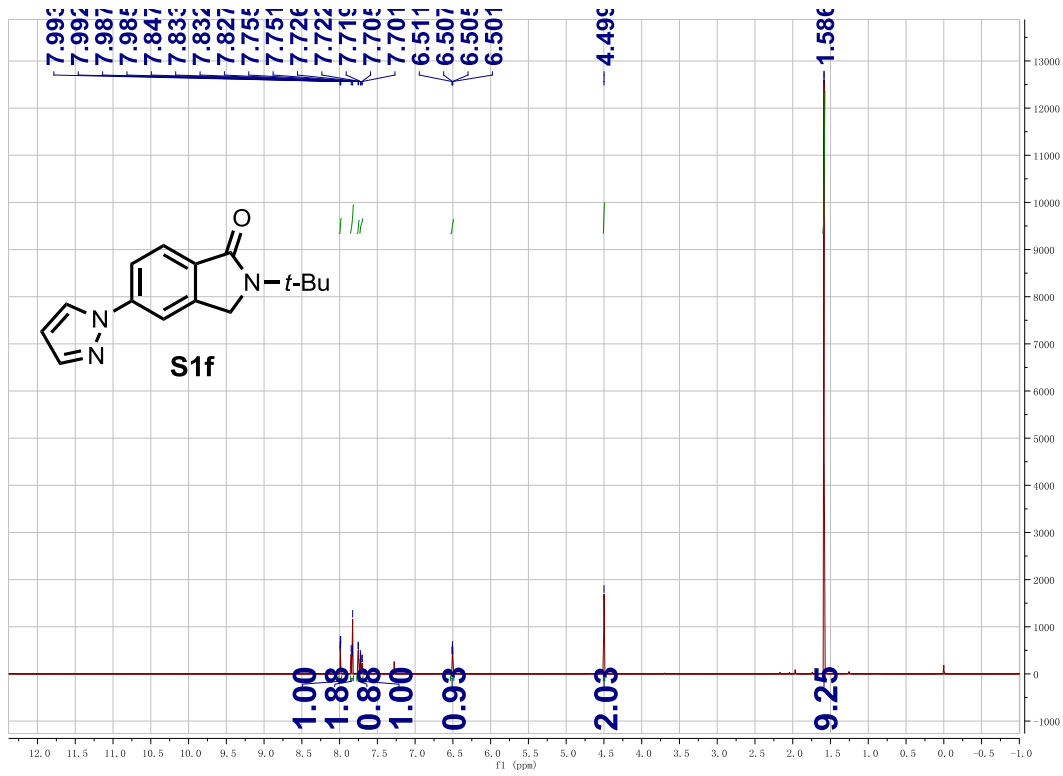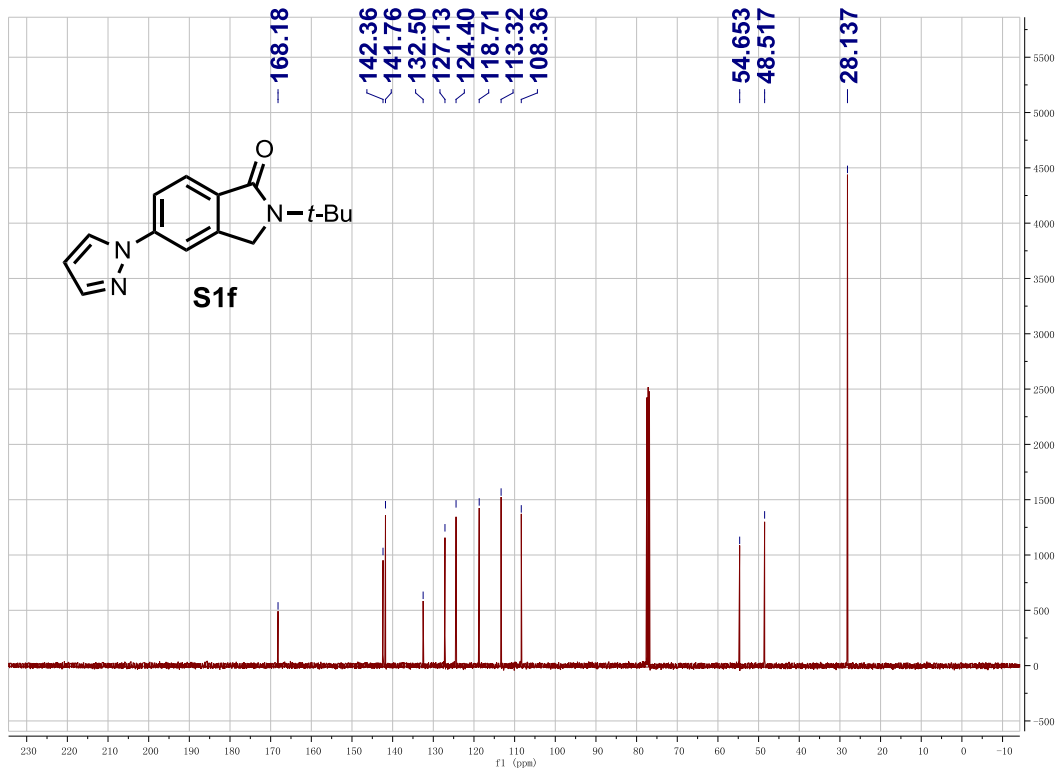



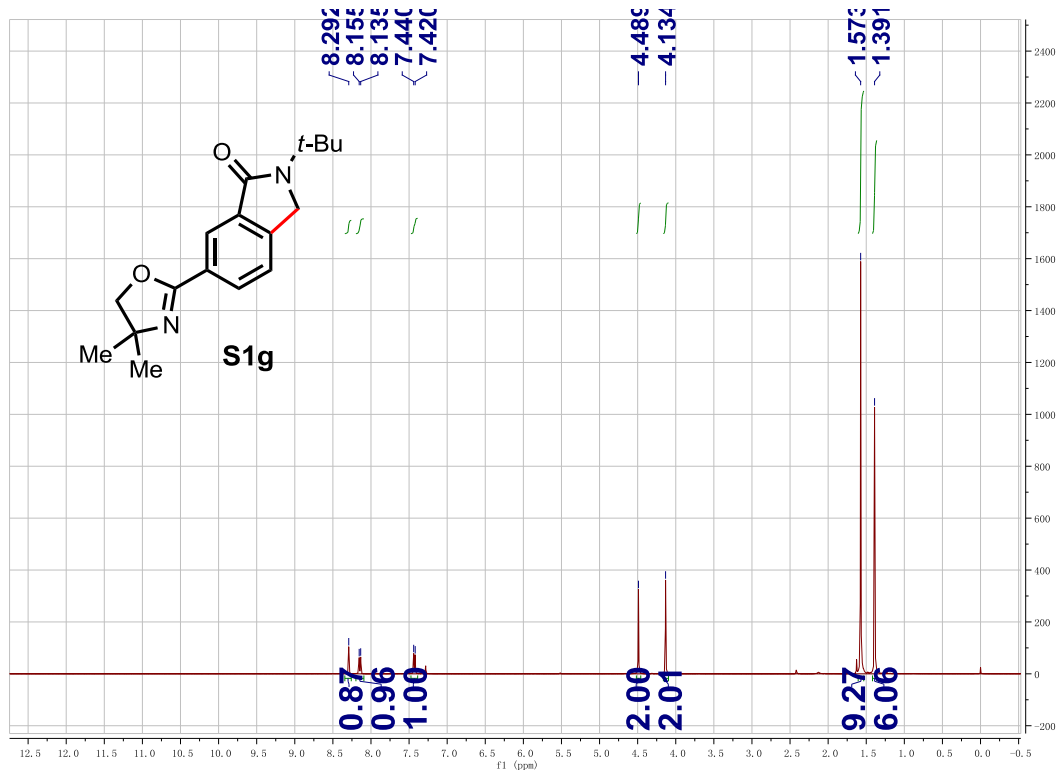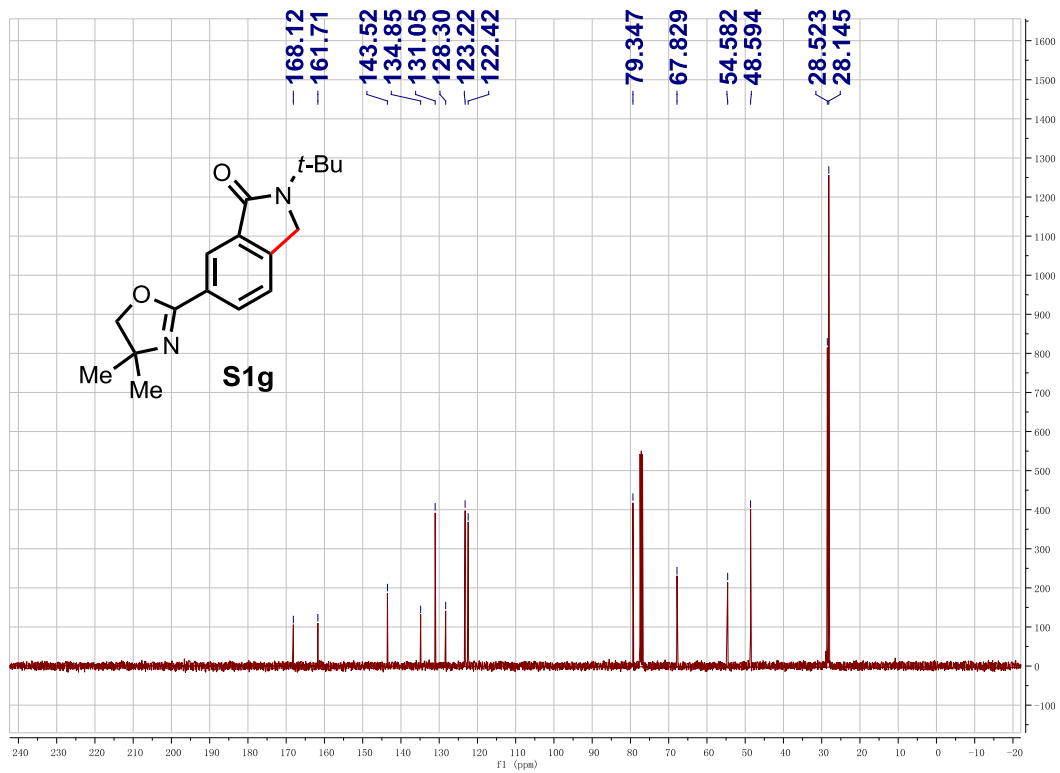

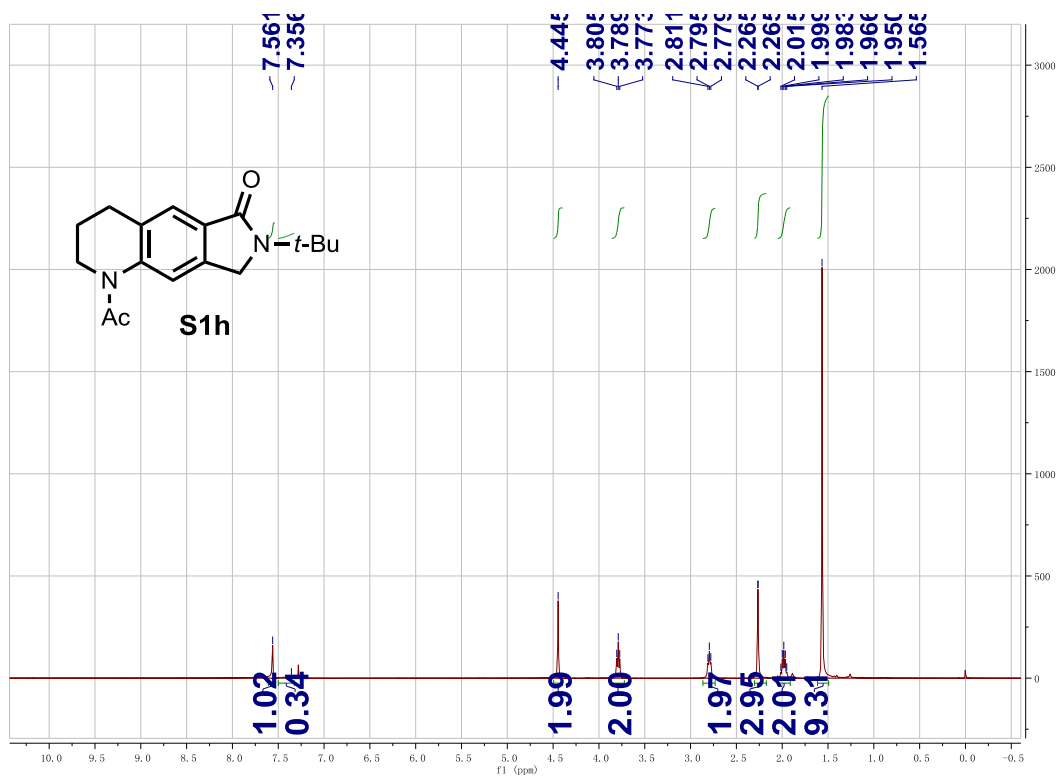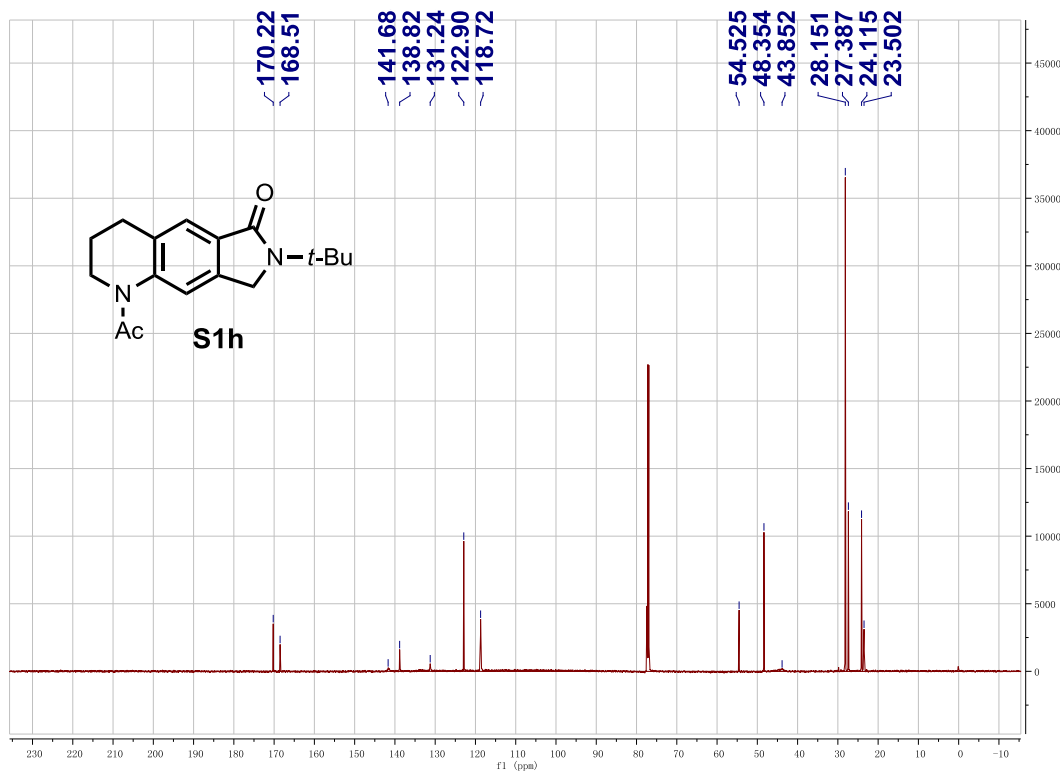

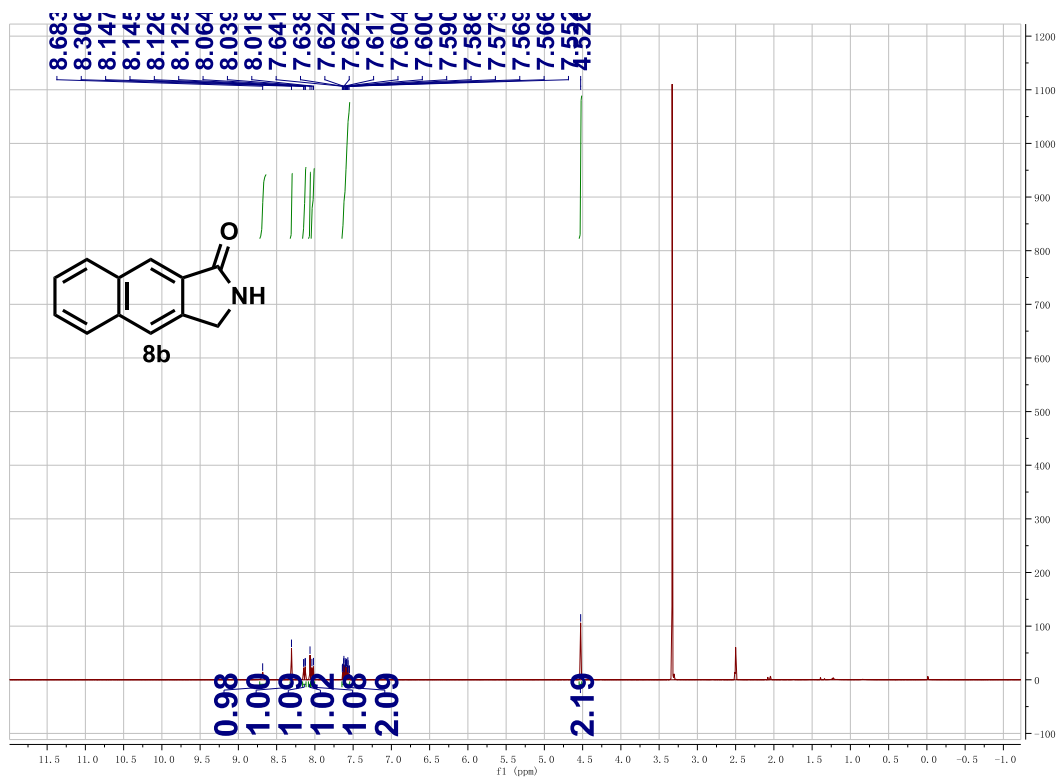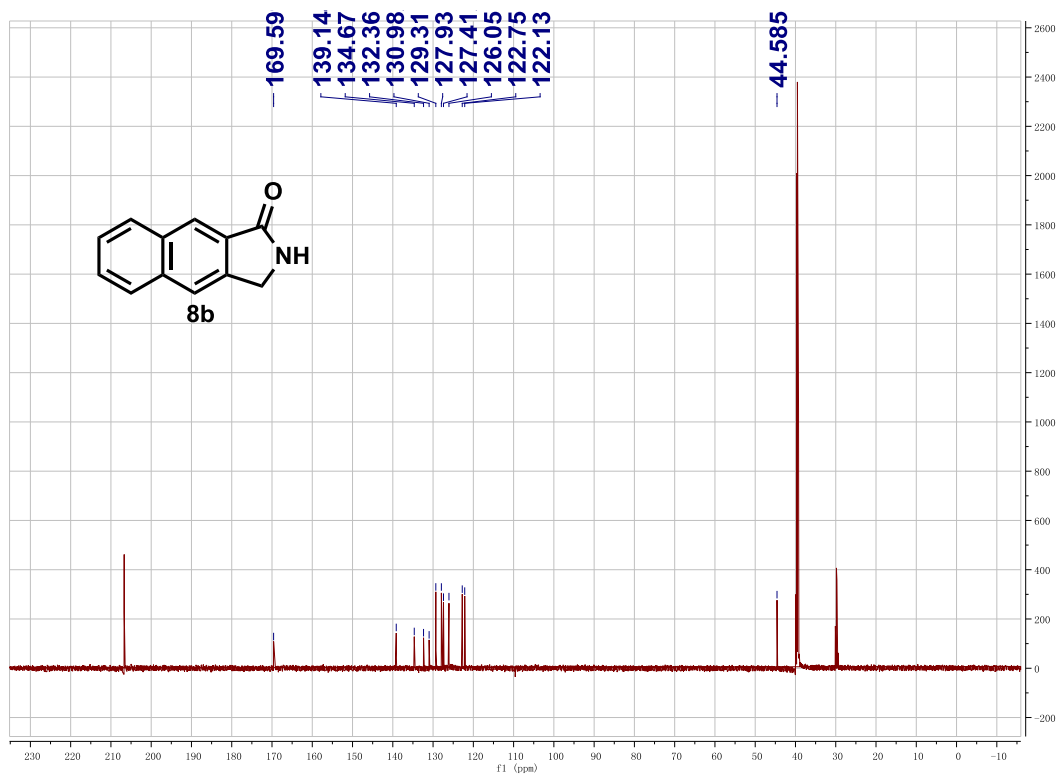

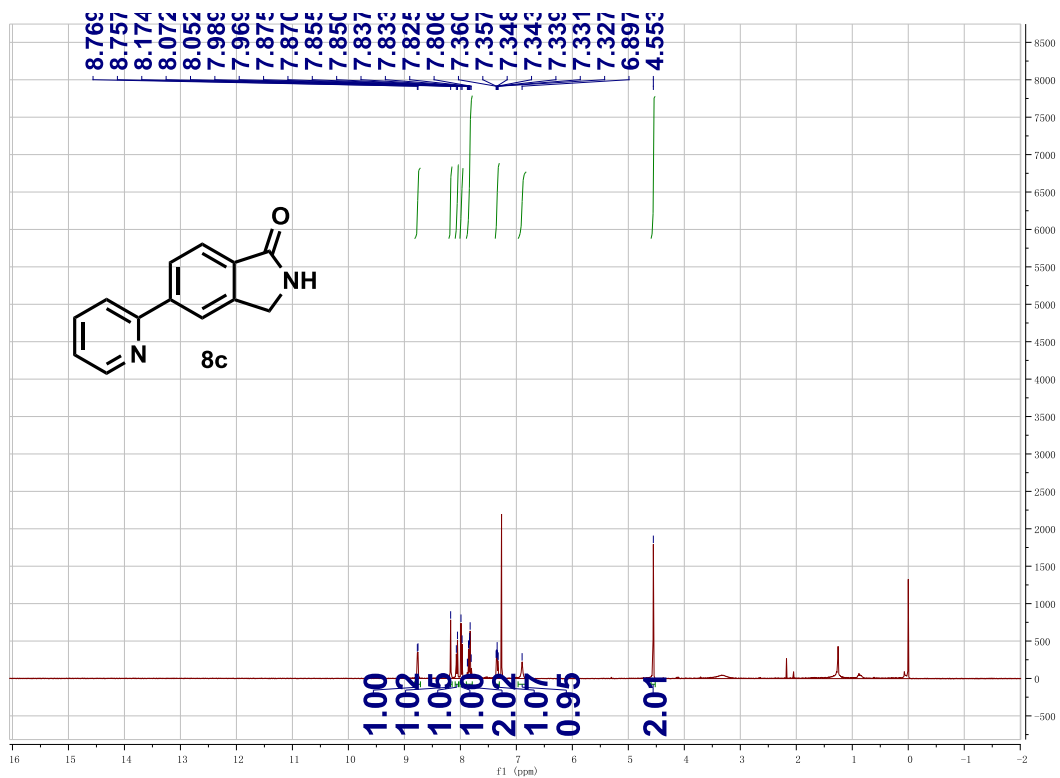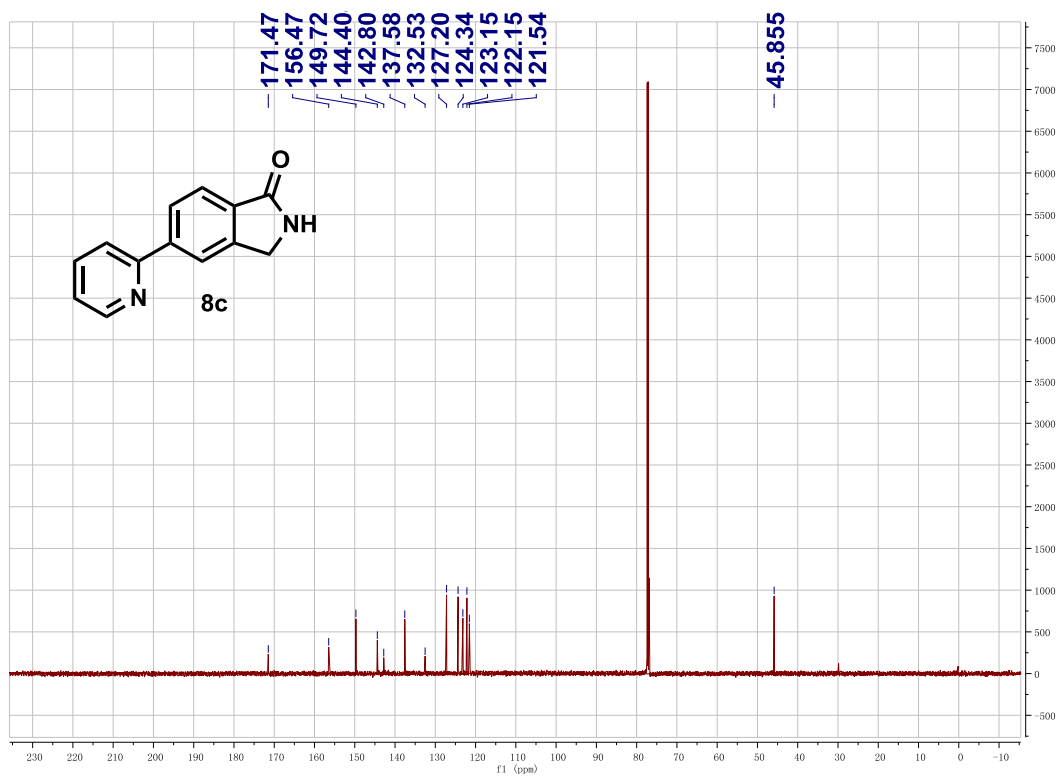

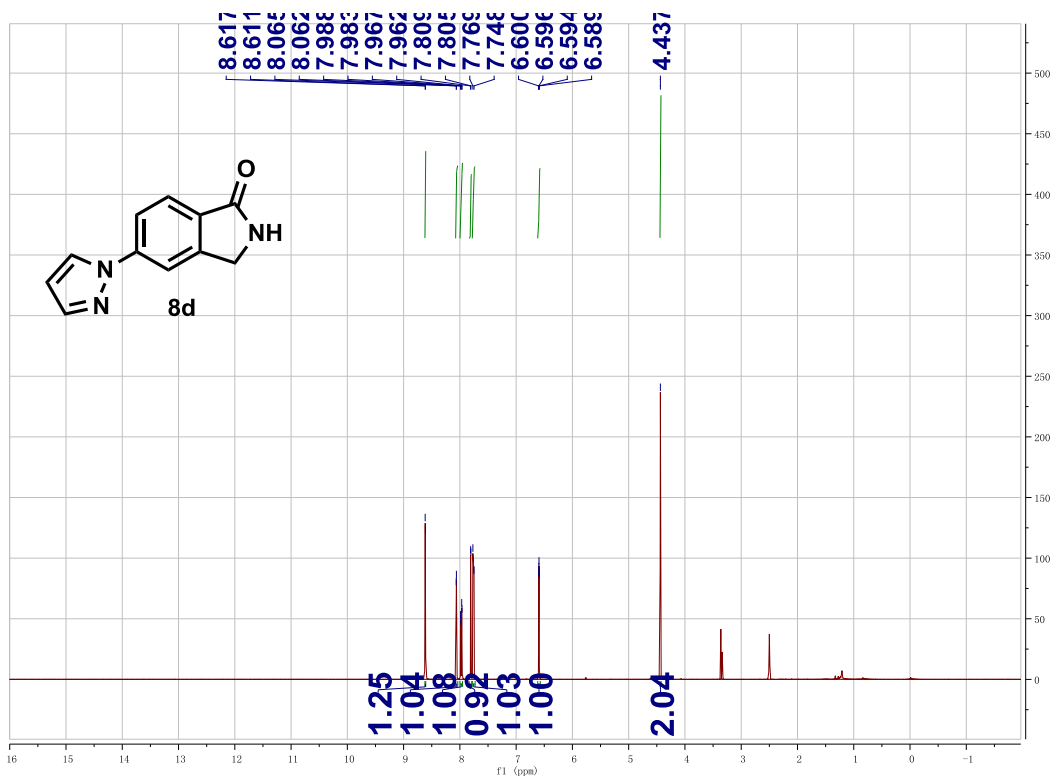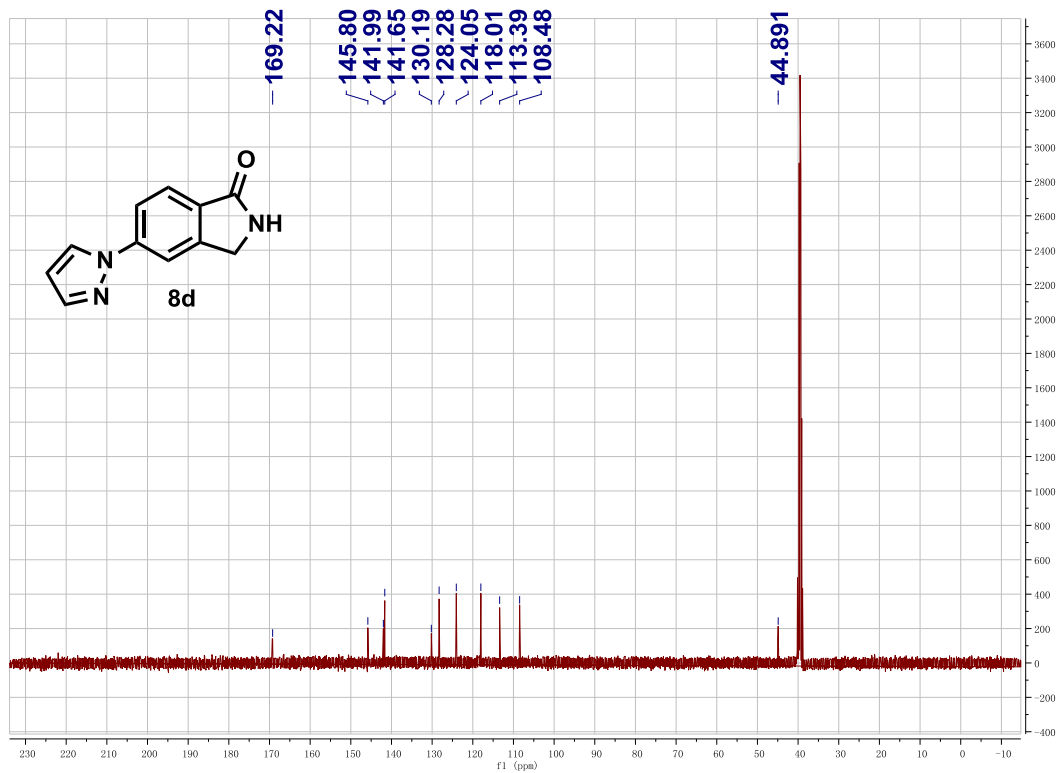



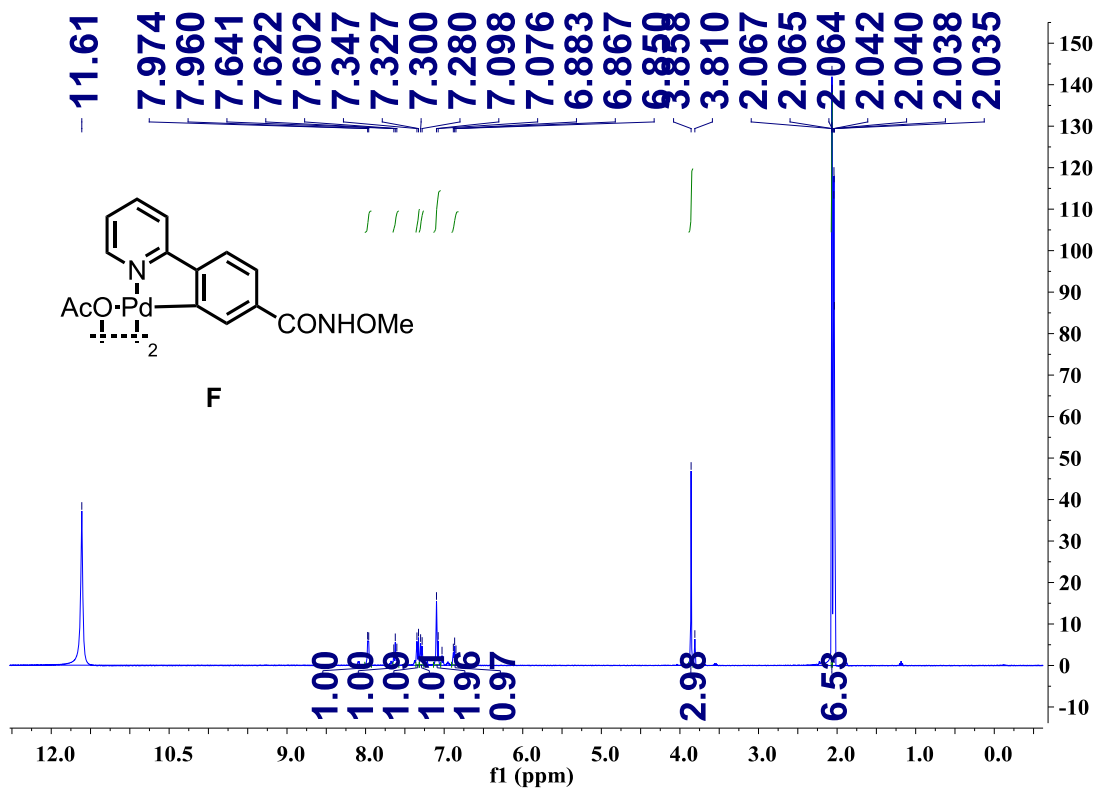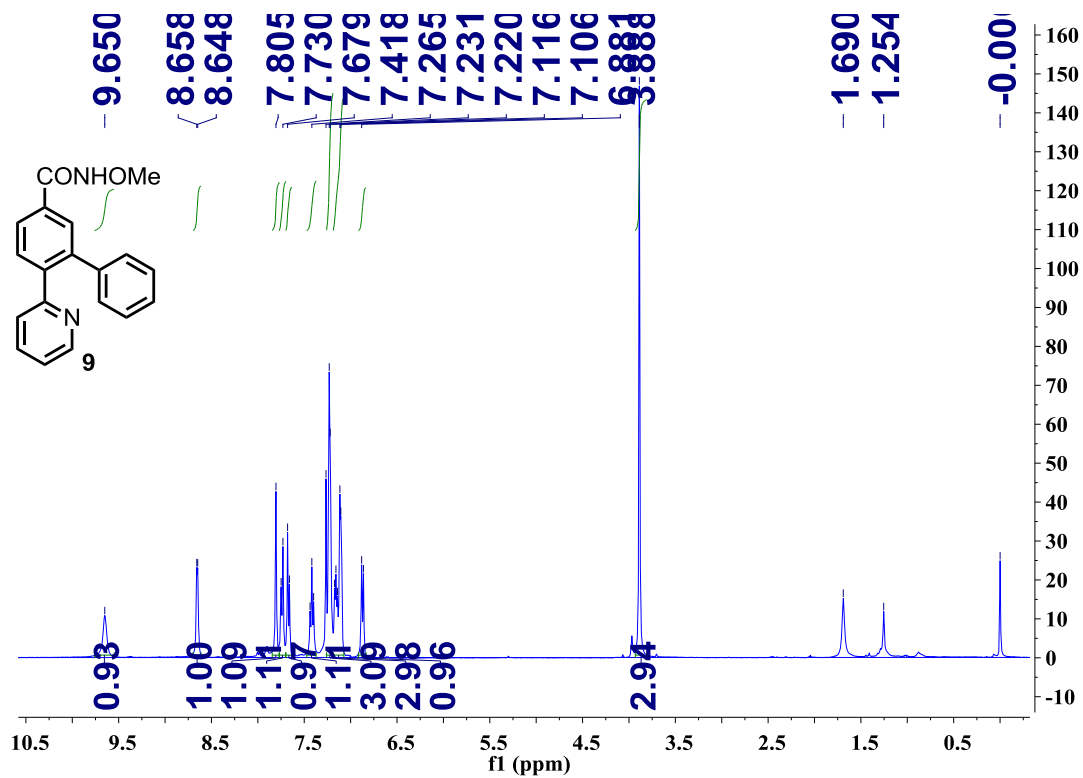

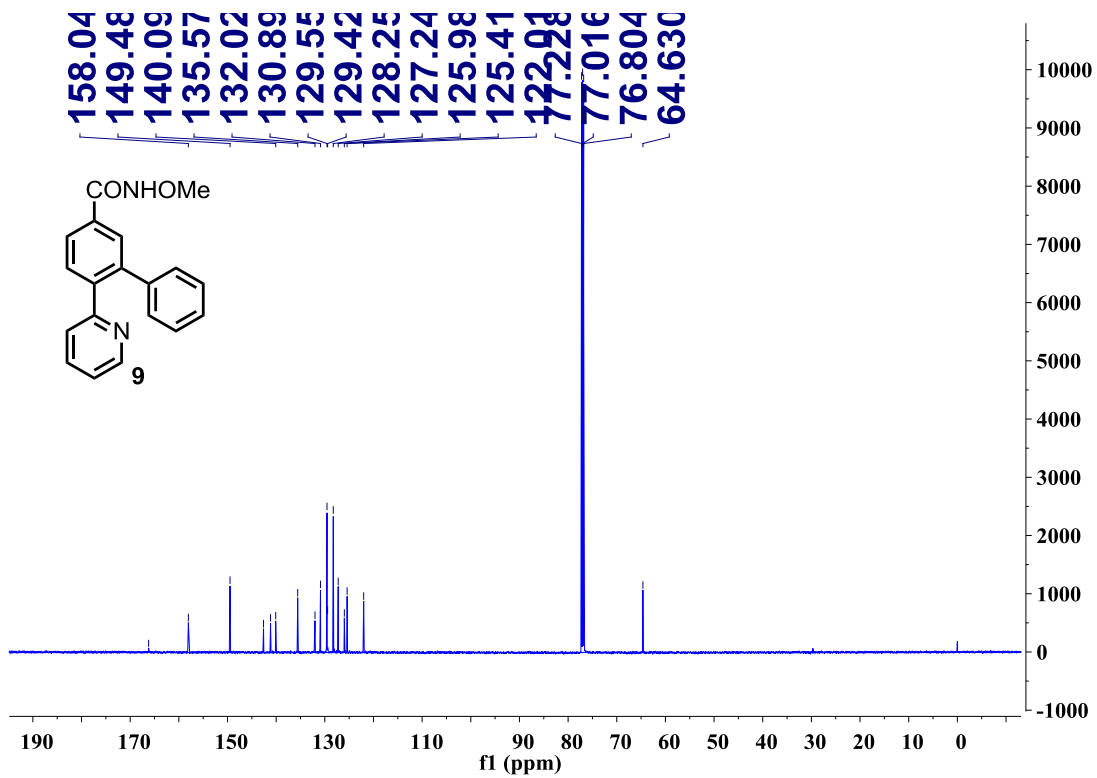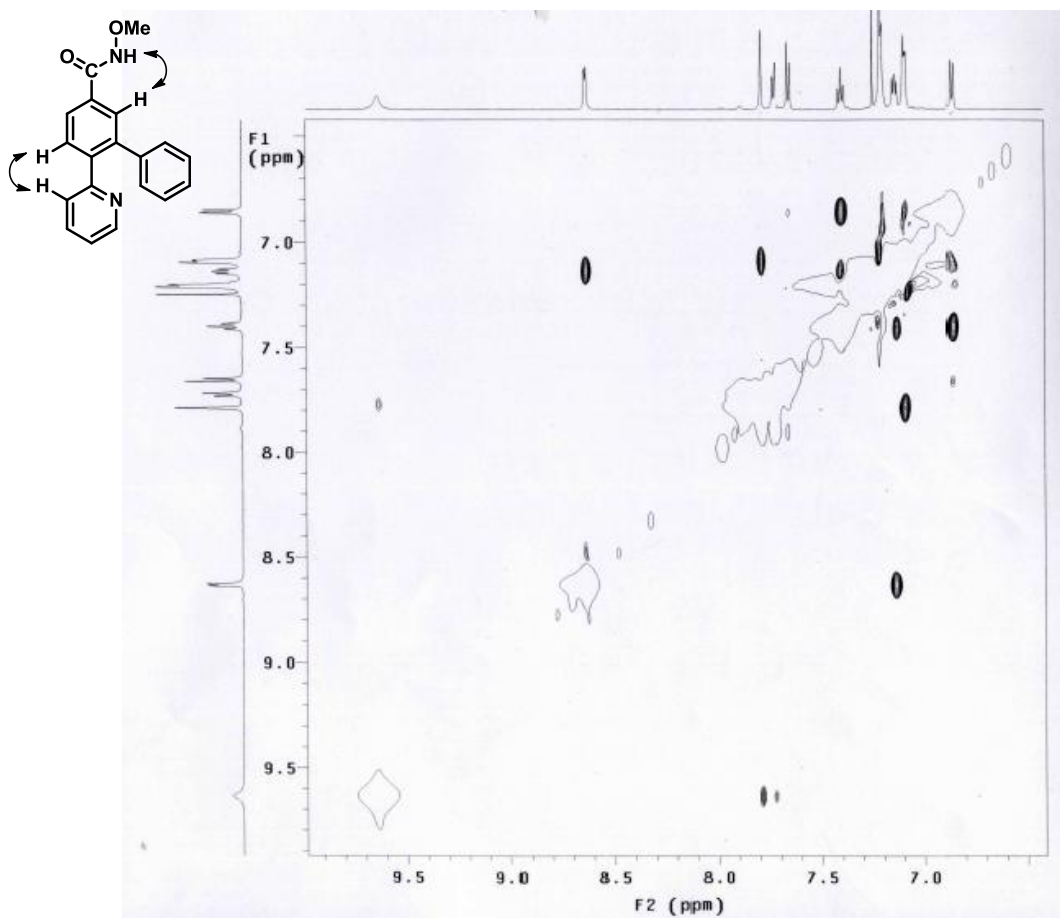



## 6. X-ray Crystallographic Data of Compounds E, F, 3a, 5i

### 6.1 X-ray Crystallographic Data of Compound E

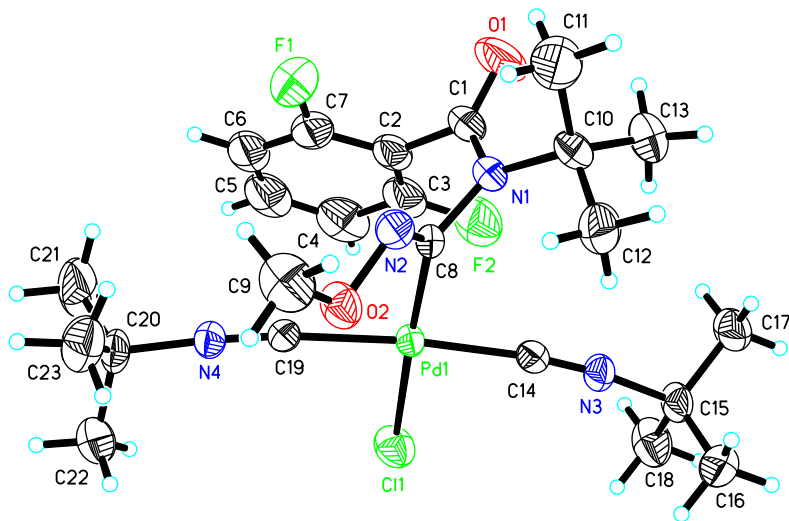

E

Table 1. Crystal data and structure refinement for cd213256.

|                             |                                                                                                                            |
|-----------------------------|----------------------------------------------------------------------------------------------------------------------------|
| Identification code         | cd213256                                                                                                                   |
| Empirical formula           | C <sub>23</sub> H <sub>33</sub> Cl F <sub>2</sub> N <sub>4</sub> O <sub>2</sub> Pd                                         |
| Formula weight              | 577.38                                                                                                                     |
| Temperature                 | 293(2) K                                                                                                                   |
| Wavelength                  | 0.71073 Å                                                                                                                  |
| Crystal system, space group | Monoclinic, Cc                                                                                                             |
| Unit cell dimensions        | a = 18.6367(11) Å    alpha = 90 deg.<br>b = 18.7315(11) Å    beta = 90.5090(10) deg.<br>c = 32.542(2) Å    gamma = 90 deg. |
| Volume                      | 11359.6(12) Å <sup>3</sup>                                                                                                 |
| Z, Calculated density       | 16, 1.350 Mg/m <sup>3</sup>                                                                                                |

|                                   |                                             |
|-----------------------------------|---------------------------------------------|
| Absorption coefficient            | 0.784 mm <sup>-1</sup>                      |
| F(000)                            | 4736                                        |
| Crystal size                      | 0.213 x 0.178 x 0.121 mm                    |
| Theta range for data collection   | 1.66 to 26.00 deg.                          |
| Limiting indices                  | -22<=h<=22, -23<=k<=19, -38<=l<=40          |
| Reflections collected / unique    | 34070 / 19614 [R(int) = 0.0245]             |
| Completeness to theta = 26.00     | 100.0 %                                     |
| Absorption correction             | Empirical                                   |
| Max. and min. transmission        | 1.00000 and 0.63145                         |
| Refinement method                 | Full-matrix least-squares on F <sup>2</sup> |
| Data / restraints / parameters    | 19614 / 38 / 1267                           |
| Goodness-of-fit on F <sup>2</sup> | 1.016                                       |
| Final R indices [I>2sigma(I)]     | R1 = 0.0346, wR2 = 0.0842                   |
| R indices (all data)              | R1 = 0.0415, wR2 = 0.0885                   |
| Absolute structure parameter      | 0.00(4)                                     |
| Largest diff. peak and hole       | 0.562 and -0.317 e.Å <sup>-3</sup>          |

Table 2. Atomic coordinates ( x 10<sup>4</sup>) and equivalent isotropic displacement parameters (Å<sup>2</sup> x 10<sup>3</sup>) for cd213256. U(eq) is defined as one third of the trace of the orthogonalized Uij tensor.

|       | x       | y       | z       | U(eq) |
|-------|---------|---------|---------|-------|
| Pd(1) | 1424(1) | 4677(1) | 4990(1) | 46(1) |
| PdA   | 2813(1) | 2130(1) | 7891(1) | 48(1) |

|         |           |           |          |         |
|---------|-----------|-----------|----------|---------|
| Pd (1B) | 8657 (1)  | 3025 (1)  | 7903 (1) | 49 (1)  |
| Pd (1C) | 540 (1)   | 543 (1)   | 4990 (1) | 46 (1)  |
| C1 (1)  | 1829 (1)  | 4513 (1)  | 4309 (1) | 79 (1)  |
| C1 (1A) | 2358 (1)  | 2017 (1)  | 8567 (1) | 85 (1)  |
| C1 (1B) | 8825 (1)  | 3486 (1)  | 8575 (1) | 84 (1)  |
| C1 (1C) | 421 (1)   | 1043 (1)  | 4325 (1) | 83 (1)  |
| F (1)   | 200 (3)   | 3357 (2)  | 5870 (2) | 130 (2) |
| F (2)   | -271 (2)  | 4562 (3)  | 4656 (2) | 118 (1) |
| F (1A)  | 4506 (2)  | 2088 (3)  | 8287 (1) | 108 (1) |
| F (2A)  | 4036 (3)  | 704 (3)   | 7127 (2) | 126 (2) |
| F (1B)  | 8688 (2)  | 1346 (2)  | 8323 (1) | 98 (1)  |
| F (2B)  | 10020 (2) | 1749 (3)  | 7142 (1) | 113 (1) |
| F (1C)  | 440 (2)   | -1119 (2) | 4549 (1) | 94 (1)  |
| F (2C)  | -811 (2)  | -773 (3)  | 5764 (1) | 104 (1) |
| N (1)   | 325 (2)   | 5099 (2)  | 5612 (1) | 59 (1)  |
| N (2)   | 1379 (3)  | 4767 (2)  | 5898 (1) | 63 (1)  |
| N (3)   | 896 (2)   | 6125 (2)  | 4636 (1) | 56 (1)  |
| N (4)   | 2128 (2)  | 3202 (2)  | 5201 (1) | 60 (1)  |
| N (1A)  | 3972 (2)  | 2469 (2)  | 7286 (1) | 61 (1)  |
| N (2A)  | 2912 (3)  | 2170 (3)  | 6994 (2) | 79 (2)  |
| N (3A)  | 3330 (2)  | 3600 (2)  | 8204 (1) | 63 (1)  |
| N (4A)  | 2132 (2)  | 651 (2)   | 7680 (2) | 66 (1)  |
| N (1B)  | 8237 (2)  | 1850 (2)  | 7323 (1) | 59 (1)  |
| N (2B)  | 8552 (3)  | 2871 (3)  | 7004 (1) | 73 (1)  |
| N (3B)  | 10139 (2) | 3657 (3)  | 7648 (2) | 78 (1)  |
| N (4B)  | 7194 (2)  | 2529 (2)  | 8250 (1) | 62 (1)  |
| N (1C)  | 907 (2)   | -650 (2)  | 5561 (1) | 59 (1)  |
| N (2C)  | 524 (3)   | 337 (3)   | 5891 (1) | 72 (1)  |
| N (3C)  | -941 (2)  | 1235 (2)  | 5177 (1) | 61 (1)  |
| N (4C)  | 2010 (2)  | 33 (2)    | 4658 (1) | 63 (1)  |
| O (1)   | -847 (3)  | 4744 (3)  | 5601 (2) | 134 (2) |
| O (2)   | 2111 (2)  | 4597 (2)  | 5836 (1) | 71 (1)  |
| O (1A)  | 5139 (2)  | 2112 (3)  | 7370 (2) | 115 (2) |
| O (2A)  | 2168 (2)  | 2020 (3)  | 7048 (1) | 90 (2)  |
| O (1B)  | 8590 (3)  | 693 (2)   | 7407 (2) | 114 (2) |
| O (2B)  | 8728 (3)  | 3603 (2)  | 7029 (1) | 83 (1)  |
| O (1C)  | 598 (3)   | -1818 (2) | 5444 (2) | 102 (2) |
| O (2C)  | 336 (3)   | 1068 (2)  | 5868 (1) | 88 (1)  |
| C (1)   | -231 (3)  | 4658 (3)  | 5510 (2) | 83 (2)  |
| C (2)   | -37 (3)   | 3986 (4)  | 5284 (2) | 74 (2)  |
| C (3)   | -94 (3)   | 3966 (5)  | 4869 (3) | 97 (3)  |
| C (4)   | 36 (4)    | 3346 (5)  | 4632 (3) | 107 (3) |
| C (5)   | 218 (4)   | 2743 (5)  | 4843 (4) | 117 (3) |
| C (6)   | 277 (4)   | 2731 (4)  | 5259 (3) | 104 (3) |
| C (7)   | 144 (4)   | 3357 (4)  | 5458 (3) | 86 (2)  |
| C (8)   | 1038 (3)  | 4843 (3)  | 5559 (1) | 48 (1)  |
| C (9)   | 2423 (4)  | 4406 (4)  | 6220 (2) | 99 (2)  |

|         |           |          |          |         |
|---------|-----------|----------|----------|---------|
| C (10)  | 171 (4)   | 5803 (3) | 5829 (2) | 76 (2)  |
| C (11)  | -55 (6)   | 5642 (4) | 6270 (2) | 135 (4) |
| C (12)  | 833 (4)   | 6263 (3) | 5833 (2) | 89 (2)  |
| C (13)  | -408 (4)  | 6209 (4) | 5604 (2) | 99 (2)  |
| C (14)  | 1079 (3)  | 5614 (3) | 4797 (2) | 53 (1)  |
| C (15)  | 719 (3)   | 6739 (3) | 4376 (2) | 63 (1)  |
| C (16)  | 1288 (4)  | 7309 (3) | 4458 (2) | 92 (2)  |
| C (17)  | -15 (4)   | 7007 (4) | 4481 (2) | 85 (2)  |
| C (18)  | 757 (4)   | 6483 (4) | 3937 (2) | 94 (2)  |
| C (19)  | 1843 (2)  | 3737 (2) | 5143 (2) | 52 (1)  |
| C (20)  | 2535 (3)  | 2540 (2) | 5279 (2) | 62 (1)  |
| C (21)  | 2015 (5)  | 1925 (4) | 5282 (5) | 206 (7) |
| C (22)  | 3084 (4)  | 2477 (4) | 4941 (2) | 101 (2) |
| C (23)  | 2898 (5)  | 2625 (4) | 5688 (2) | 110 (2) |
| C (1A)  | 4494 (3)  | 2035 (4) | 7433 (2) | 79 (2)  |
| C (2A)  | 4284 (3)  | 1425 (4) | 7706 (2) | 66 (2)  |
| C (3A)  | 4100 (4)  | 758 (4)  | 7544 (3) | 88 (2)  |
| C (4A)  | 3979 (4)  | 170 (4)  | 7763 (3) | 109 (3) |
| C (5A)  | 4025 (4)  | 231 (5)  | 8170 (4) | 127 (4) |
| C (6A)  | 4204 (4)  | 871 (5)  | 8377 (2) | 103 (3) |
| C (7A)  | 4329 (3)  | 1456 (4) | 8111 (2) | 78 (2)  |
| C (8A)  | 3236 (3)  | 2241 (3) | 7332 (2) | 56 (1)  |
| C (9A)  | 1864 (5)  | 1888 (8) | 6661 (3) | 186 (6) |
| C (10A) | 4164 (4)  | 3136 (4) | 7031 (2) | 81 (2)  |
| C (11A) | 4750 (4)  | 3541 (4) | 7260 (3) | 104 (2) |
| C (12A) | 3504 (4)  | 3616 (4) | 6997 (3) | 121 (3) |
| C (13A) | 4429 (6)  | 2880 (5) | 6606 (2) | 134 (3) |
| C (14A) | 3156 (3)  | 3084 (3) | 8062 (2) | 54 (1)  |
| C (15A) | 3484 (3)  | 4234 (3) | 8461 (2) | 74 (2)  |
| C (16A) | 3464 (6)  | 3988 (5) | 8905 (2) | 129 (3) |
| C (17A) | 4217 (4)  | 4508 (4) | 8331 (3) | 99 (2)  |
| C (18A) | 2900 (5)  | 4772 (4) | 8378 (3) | 113 (3) |
| C (19A) | 2401 (3)  | 1183 (3) | 7739 (2) | 56 (1)  |
| C (20A) | 1747 (5)  | -5 (4)   | 7583 (3) | 119 (2) |
| C (21A) | 1265 (5)  | 125 (5)  | 7227 (3) | 145 (3) |
| C (22A) | 1122 (6)  | -76 (5)  | 7919 (4) | 150 (3) |
| C (23A) | 2181 (6)  | -597 (4) | 7670 (4) | 157 (3) |
| C (1B)  | 8677 (3)  | 1324 (3) | 7463 (2) | 71 (2)  |
| C (2B)  | 9319 (3)  | 1545 (3) | 7726 (2) | 61 (1)  |
| C (3B)  | 9311 (4)  | 1504 (3) | 8139 (2) | 72 (2)  |
| C (4B)  | 9914 (5)  | 1644 (3) | 8382 (2) | 93 (2)  |
| C (5B)  | 10545 (5) | 1797 (4) | 8194 (3) | 103 (2) |
| C (6B)  | 10602 (4) | 1830 (3) | 7772 (3) | 88 (2)  |
| C (7B)  | 9984 (3)  | 1700 (3) | 7553 (2) | 74 (2)  |
| C (8B)  | 8493 (3)  | 2582 (3) | 7349 (2) | 51 (1)  |
| C (9B)  | 8830 (5)  | 3868 (4) | 6620 (2) | 119 (3) |
| C (10B) | 7561 (4)  | 1675 (4) | 7085 (2) | 80 (2)  |

|         |            |           |           |          |
|---------|------------|-----------|-----------|----------|
| C (11B) | 7767 (5)   | 1398 (5)  | 6671 (2)  | 125 (3)  |
| C (12B) | 7076 (4)   | 2333 (5)  | 7067 (3)  | 102 (2)  |
| C (13B) | 7145 (4)   | 1102 (4)  | 7322 (2)  | 100 (2)  |
| C (14B) | 9595 (2)   | 3410 (3)  | 7728 (2)  | 60 (1)   |
| C (15B) | 10800 (3)  | 4035 (4)  | 7537 (3)  | 115 (3)  |
| C (16B) | 11449 (9)  | 3542 (10) | 7625 (10) | 138 (8)  |
| C (17B) | 10868 (5)  | 4696 (6)  | 7874 (5)  | 103 (4)  |
| C (18B) | 10693 (11) | 4392 (13) | 7127 (5)  | 132 (7)  |
| C (16D) | 11309 (15) | 3821 (17) | 7743 (16) | 149 (9)  |
| C (18D) | 11035 (15) | 3479 (19) | 7091 (9)  | 193 (15) |
| C (17D) | 10672 (17) | 4600 (20) | 7361 (9)  | 141 (8)  |
| C (19B) | 7714 (3)   | 2699 (2)  | 8095 (2)  | 53 (1)   |
| C (20B) | 6562 (3)   | 2378 (3)  | 8508 (2)  | 65 (1)   |
| C (21B) | 6003 (4)   | 2941 (4)  | 8412 (2)  | 91 (2)   |
| C (22B) | 6304 (3)   | 1636 (3)  | 8394 (2)  | 83 (2)   |
| C (23B) | 6815 (4)   | 2419 (5)  | 8944 (2)  | 107 (2)  |
| C (1C)  | 492 (3)    | -1180 (3) | 5411 (2)  | 66 (1)   |
| C (2C)  | -159 (3)   | -949 (3)  | 5170 (2)  | 62 (1)   |
| C (3C)  | -180 (4)   | -949 (3)  | 4739 (2)  | 72 (2)   |
| C (4C)  | -791 (5)   | -785 (4)  | 4524 (2)  | 90 (2)   |
| C (5C)  | -1394 (4)  | -626 (3)  | 4724 (3)  | 92 (2)   |
| C (6C)  | -1401 (4)  | -602 (4)  | 5139 (3)  | 94 (2)   |
| C (7C)  | -798 (3)   | -773 (3)  | 5353 (2)  | 72 (2)   |
| C (8C)  | 648 (3)    | 67 (3)    | 5544 (2)  | 54 (1)   |
| C (9C)  | 24 (5)     | 1245 (5)  | 6248 (2)  | 126 (3)  |
| C (10C) | 1589 (4)   | -825 (3)  | 5811 (2)  | 75 (2)   |
| C (11C) | 1345 (5)   | -1158 (5) | 6224 (2)  | 118 (3)  |
| C (12C) | 2052 (4)   | -1349 (5) | 5565 (3)  | 112 (3)  |
| C (13C) | 2016 (4)   | -164 (5)  | 5895 (3)  | 104 (2)  |
| C (14C) | -410 (2)   | 960 (2)   | 5140 (2)  | 53 (1)   |
| C (15C) | -1616 (3)  | 1621 (3)  | 5240 (2)  | 69 (1)   |
| C (16C) | -2242 (5)  | 1128 (6)  | 5120 (5)  | 96 (4)   |
| C (16H) | -2103 (9)  | 1120 (10) | 5502 (8)  | 111 (5)  |
| C (17C) | -1528 (5)  | 2019 (7)  | 5640 (3)  | 156 (5)  |
| C (18C) | -1681 (5)  | 2190 (6)  | 4916 (3)  | 135 (4)  |
| C (19C) | 1496 (3)   | 207 (3)   | 4809 (2)  | 53 (1)   |
| C (20C) | 2629 (3)   | -126 (4)  | 4404 (2)  | 74 (2)   |
| C (21C) | 2886 (4)   | -864 (4)  | 4502 (2)  | 98 (2)   |
| C (22C) | 3191 (4)   | 432 (4)   | 4497 (3)  | 107 (3)  |
| C (23C) | 2366 (5)   | -57 (5)   | 3955 (2)  | 113 (3)  |

Table 3. Bond lengths [Å] and angles [deg] for cd213256.

|             |           |
|-------------|-----------|
| Pd(1)–C(14) | 1.971 (5) |
| Pd(1)–C(19) | 1.988 (5) |

|               |            |
|---------------|------------|
| Pd(1)-C(8)    | 2.017(5)   |
| Pd(1)-Cl(1)   | 2.3667(14) |
| PdA-C(14A)    | 1.976(5)   |
| PdA-C(19A)    | 1.993(5)   |
| PdA-C(8A)     | 2.002(5)   |
| PdA-Cl(1A)    | 2.3727(15) |
| Pd(1B)-C(19B) | 1.968(5)   |
| Pd(1B)-C(14B) | 1.979(5)   |
| Pd(1B)-C(8B)  | 2.006(5)   |
| Pd(1B)-Cl(1B) | 2.3688(15) |
| Pd(1C)-C(19C) | 1.983(5)   |
| Pd(1C)-C(14C) | 1.999(5)   |
| Pd(1C)-C(8C)  | 2.019(5)   |
| Pd(1C)-Cl(1C) | 2.3673(15) |
| F(1)-C(7)     | 1.344(9)   |
| F(2)-C(3)     | 1.352(10)  |
| F(1A)-C(7A)   | 1.355(9)   |
| F(2A)-C(3A)   | 1.365(9)   |
| F(1B)-C(3B)   | 1.343(8)   |
| F(2B)-C(7B)   | 1.343(7)   |
| F(1C)-C(3C)   | 1.352(8)   |
| F(2C)-C(7C)   | 1.335(8)   |
| N(1)-C(1)     | 1.364(8)   |
| N(1)-C(8)     | 1.425(6)   |
| N(1)-C(10)    | 1.525(7)   |
| N(2)-C(8)     | 1.277(6)   |
| N(2)-O(2)     | 1.417(6)   |
| N(3)-C(14)    | 1.142(6)   |
| N(3)-C(15)    | 1.462(6)   |
| N(4)-C(19)    | 1.148(6)   |
| N(4)-C(20)    | 1.475(6)   |
| N(1A)-C(1A)   | 1.353(8)   |
| N(1A)-C(8A)   | 1.445(6)   |
| N(1A)-C(10A)  | 1.543(7)   |
| N(2A)-C(8A)   | 1.257(7)   |
| N(2A)-O(2A)   | 1.428(6)   |
| N(3A)-C(14A)  | 1.118(6)   |
| N(3A)-C(15A)  | 1.479(7)   |
| N(4A)-C(19A)  | 1.131(6)   |
| N(4A)-C(20A)  | 1.457(8)   |
| N(1B)-C(1B)   | 1.357(8)   |
| N(1B)-C(8B)   | 1.454(6)   |
| N(1B)-C(10B)  | 1.510(8)   |
| N(2B)-C(8B)   | 1.253(6)   |
| N(2B)-O(2B)   | 1.413(6)   |
| N(3B)-C(14B)  | 1.147(6)   |
| N(3B)-C(15B)  | 1.469(7)   |

|              |             |
|--------------|-------------|
| N(4B)-C(19B) | 1. 142 (6)  |
| N(4B)-C(20B) | 1. 479 (6)  |
| N(1C)-C(1C)  | 1. 348 (8)  |
| N(1C)-C(8C)  | 1. 429 (7)  |
| N(1C)-C(10C) | 1. 538 (7)  |
| N(2C)-C(8C)  | 1. 262 (7)  |
| N(2C)-O(2C)  | 1. 416 (6)  |
| N(3C)-C(14C) | 1. 123 (6)  |
| N(3C)-C(15C) | 1. 468 (6)  |
| N(4C)-C(19C) | 1. 128 (6)  |
| N(4C)-C(20C) | 1. 456 (6)  |
| O(1)-C(1)    | 1. 199 (7)  |
| O(2)-C(9)    | 1. 420 (7)  |
| O(1A)-C(1A)  | 1. 229 (7)  |
| O(2A)-C(9A)  | 1. 400 (9)  |
| O(1B)-C(1B)  | 1. 207 (7)  |
| O(2B)-C(9B)  | 1. 434 (8)  |
| O(1C)-C(1C)  | 1. 216 (7)  |
| O(2C)-C(9C)  | 1. 409 (8)  |
| C(1)-C(2)    | 1. 505 (9)  |
| C(2)-C(7)    | 1. 349 (10) |
| C(2)-C(3)    | 1. 354 (11) |
| C(3)-C(4)    | 1. 416 (11) |
| C(4)-C(5)    | 1. 364 (13) |
| C(4)-H(4)    | 0. 9300     |
| C(5)-C(6)    | 1. 356 (12) |
| C(5)-H(5)    | 0. 9300     |
| C(6)-C(7)    | 1. 365 (10) |
| C(6)-H(6)    | 0. 9300     |
| C(9)-H(9A)   | 0. 9600     |
| C(9)-H(9B)   | 0. 9600     |
| C(9)-H(9C)   | 0. 9600     |
| C(10)-C(12)  | 1. 505 (9)  |
| C(10)-C(13)  | 1. 505 (9)  |
| C(10)-C(11)  | 1. 529 (9)  |
| C(11)-H(11A) | 0. 9600     |
| C(11)-H(11B) | 0. 9600     |
| C(11)-H(11C) | 0. 9600     |
| C(12)-H(12A) | 0. 9600     |
| C(12)-H(12B) | 0. 9600     |
| C(12)-H(12C) | 0. 9600     |
| C(13)-H(13A) | 0. 9600     |
| C(13)-H(13B) | 0. 9600     |
| C(13)-H(13C) | 0. 9600     |
| C(15)-C(17)  | 1. 500 (8)  |
| C(15)-C(18)  | 1. 512 (8)  |
| C(15)-C(16)  | 1. 527 (9)  |

|                 |             |
|-----------------|-------------|
| C (16)–H(16A)   | 0. 9600     |
| C (16)–H(16B)   | 0. 9600     |
| C (16)–H(16C)   | 0. 9600     |
| C (17)–H(17A)   | 0. 9600     |
| C (17)–H(17B)   | 0. 9600     |
| C (17)–H(17C)   | 0. 9600     |
| C (18)–H(18A)   | 0. 9600     |
| C (18)–H(18B)   | 0. 9600     |
| C (18)–H(18C)   | 0. 9600     |
| C (20)–C (23)   | 1. 498 (9)  |
| C (20)–C (21)   | 1. 505 (9)  |
| C (20)–C (22)   | 1. 514 (9)  |
| C (21)–H(21A)   | 0. 9600     |
| C (21)–H(21B)   | 0. 9600     |
| C (21)–H(21C)   | 0. 9600     |
| C (22)–H(22A)   | 0. 9600     |
| C (22)–H(22B)   | 0. 9600     |
| C (22)–H(22C)   | 0. 9600     |
| C (23)–H(23A)   | 0. 9600     |
| C (23)–H(23B)   | 0. 9600     |
| C (23)–H(23C)   | 0. 9600     |
| C (1A)–C (2A)   | 1. 500 (8)  |
| C (2A)–C (7A)   | 1. 321 (9)  |
| C (2A)–C (3A)   | 1. 397 (10) |
| C (3A)–C (4A)   | 1. 332 (10) |
| C (4A)–C (5A)   | 1. 332 (14) |
| C (4A)–H(4A)    | 0. 9300     |
| C (5A)–C (6A)   | 1. 415 (14) |
| C (5A)–H(5A)    | 0. 9300     |
| C (6A)–C (7A)   | 1. 419 (10) |
| C (6A)–H(6A)    | 0. 9300     |
| C (9A)–H(9A1)   | 0. 9600     |
| C (9A)–H(9A2)   | 0. 9600     |
| C (9A)–H(9A3)   | 0. 9600     |
| C (10A)–C (11A) | 1. 519 (9)  |
| C (10A)–C (12A) | 1. 527 (10) |
| C (10A)–C (13A) | 1. 549 (11) |
| C (11A)–H(11D)  | 0. 9600     |
| C (11A)–H(11E)  | 0. 9600     |
| C (11A)–H(11F)  | 0. 9600     |
| C (12A)–H(12D)  | 0. 9600     |
| C (12A)–H(12E)  | 0. 9600     |
| C (12A)–H(12F)  | 0. 9600     |
| C (13A)–H(13D)  | 0. 9600     |
| C (13A)–H(13E)  | 0. 9600     |
| C (13A)–H(13F)  | 0. 9600     |
| C (15A)–C (18A) | 1. 506 (10) |



|                 |             |
|-----------------|-------------|
| C (15A)–C (16A) | 1. 515 (10) |
| C (15A)–C (17A) | 1. 524 (9)  |
| C (16A)–H (16D) | 0. 9600     |
| C (16A)–H (16E) | 0. 9600     |
| C (16A)–H (16F) | 0. 9600     |
| C (17A)–H (17D) | 0. 9600     |
| C (17A)–H (17E) | 0. 9600     |
| C (17A)–H (17F) | 0. 9600     |
| C (18A)–H (18D) | 0. 9600     |
| C (18A)–H (18E) | 0. 9600     |
| C (18A)–H (18F) | 0. 9600     |
| C (20A)–C (23A) | 1. 400 (12) |
| C (20A)–C (21A) | 1. 481 (13) |
| C (20A)–C (22A) | 1. 609 (14) |
| C (21A)–H (21D) | 0. 9600     |
| C (21A)–H (21E) | 0. 9600     |
| C (21A)–H (21F) | 0. 9600     |
| C (22A)–H (22D) | 0. 9600     |
| C (22A)–H (22E) | 0. 9600     |
| C (22A)–H (22F) | 0. 9600     |
| C (23A)–H (23D) | 0. 9600     |
| C (23A)–H (23E) | 0. 9600     |
| C (23A)–H (23F) | 0. 9600     |
| C (1B)–C (2B)   | 1. 522 (8)  |
| C (2B)–C (3B)   | 1. 346 (9)  |
| C (2B)–C (7B)   | 1. 394 (9)  |
| C (3B)–C (4B)   | 1. 393 (10) |
| C (4B)–C (5B)   | 1. 361 (12) |
| C (4B)–H (4B)   | 0. 9300     |
| C (5B)–C (6B)   | 1. 379 (11) |
| C (5B)–H (5B)   | 0. 9300     |
| C (6B)–C (7B)   | 1. 371 (9)  |
| C (6B)–H (6B)   | 0. 9300     |
| C (9B)–H (9B1)  | 0. 9600     |
| C (9B)–H (9B2)  | 0. 9600     |
| C (9B)–H (9B3)  | 0. 9600     |
| C (10B)–C (11B) | 1. 497 (10) |
| C (10B)–C (12B) | 1. 530 (11) |
| C (10B)–C (13B) | 1. 535 (9)  |
| C (11B)–H (11G) | 0. 9600     |
| C (11B)–H (11H) | 0. 9600     |
| C (11B)–H (11I) | 0. 9600     |
| C (12B)–H (12G) | 0. 9600     |
| C (12B)–H (12H) | 0. 9600     |
| C (12B)–H (12I) | 0. 9600     |
| C (13B)–H (13G) | 0. 9600     |
| C (13B)–H (13H) | 0. 9600     |

|                 |             |
|-----------------|-------------|
| C (13B)–H (13I) | 0. 9600     |
| C (15B)–C (16D) | 1. 22 (4)   |
| C (15B)–C (17D) | 1. 23 (4)   |
| C (15B)–C (18B) | 1. 505 (19) |
| C (15B)–C (16B) | 1. 546 (16) |
| C (15B)–C (17B) | 1. 658 (16) |
| C (15B)–C (18D) | 1. 84 (3)   |
| C (16B)–H (16G) | 0. 9600     |
| C (16B)–H (16H) | 0. 9600     |
| C (16B)–H (16I) | 0. 9600     |
| C (17B)–H (17Y) | 0. 9600     |
| C (17B)–H (17X) | 0. 9600     |
| C (17B)–H (17Z) | 0. 9600     |
| C (18B)–H (18G) | 0. 9600     |
| C (18B)–H (18H) | 0. 9600     |
| C (18B)–H (18I) | 0. 9600     |
| C (16D)–H (16J) | 0. 9600     |
| C (16D)–H (16K) | 0. 9600     |
| C (16D)–H (16L) | 0. 9600     |
| C (18D)–H (18J) | 0. 9600     |
| C (18D)–H (18K) | 0. 9600     |
| C (18D)–H (18L) | 0. 9600     |
| C (17D)–H (17J) | 0. 9600     |
| C (17D)–H (17K) | 0. 9600     |
| C (17D)–H (17L) | 0. 9600     |
| C (20B)–C (23B) | 1. 491 (9)  |
| C (20B)–C (21B) | 1. 514 (9)  |
| C (20B)–C (22B) | 1. 516 (8)  |
| C (21B)–H (21G) | 0. 9600     |
| C (21B)–H (21H) | 0. 9600     |
| C (21B)–H (21I) | 0. 9600     |
| C (22B)–H (22G) | 0. 9600     |
| C (22B)–H (22H) | 0. 9600     |
| C (22B)–H (22I) | 0. 9600     |
| C (23B)–H (23G) | 0. 9600     |
| C (23B)–H (23H) | 0. 9600     |
| C (23B)–H (23I) | 0. 9600     |
| C (1C)–C (2C)   | 1. 501 (9)  |
| C (2C)–C (7C)   | 1. 378 (9)  |
| C (2C)–C (3C)   | 1. 404 (9)  |
| C (3C)–C (4C)   | 1. 366 (10) |
| C (4C)–C (5C)   | 1. 336 (11) |
| C (4C)–H (4C)   | 0. 9300     |
| C (5C)–C (6C)   | 1. 354 (10) |
| C (5C)–H (5C)   | 0. 9300     |
| C (6C)–C (7C)   | 1. 355 (10) |
| C (6C)–H (6C)   | 0. 9300     |

|                      |              |
|----------------------|--------------|
| C (9C)–H (9C1)       | 0. 9600      |
| C (9C)–H (9C2)       | 0. 9600      |
| C (9C)–H (9C3)       | 0. 9600      |
| C (10C)–C (13C)      | 1. 496 (10)  |
| C (10C)–C (12C)      | 1. 538 (10)  |
| C (10C)–C (11C)      | 1. 551 (10)  |
| C (11C)–H (11J)      | 0. 9600      |
| C (11C)–H (11K)      | 0. 9600      |
| C (11C)–H (11L)      | 0. 9600      |
| C (12C)–H (12J)      | 0. 9600      |
| C (12C)–H (12K)      | 0. 9600      |
| C (12C)–H (12L)      | 0. 9600      |
| C (13C)–H (13J)      | 0. 9600      |
| C (13C)–H (13K)      | 0. 9600      |
| C (13C)–H (13L)      | 0. 9600      |
| C (15C)–C (18C)      | 1. 502 (11)  |
| C (15C)–C (17C)      | 1. 509 (11)  |
| C (15C)–C (16C)      | 1. 536 (12)  |
| C (15C)–C (16H)      | 1. 56 (2)    |
| C (16C)–H (16M)      | 0. 9600      |
| C (16C)–H (16N)      | 0. 9600      |
| C (16C)–H (16O)      | 0. 9600      |
| C (16H)–H (16P)      | 0. 9600      |
| C (16H)–H (16Q)      | 0. 9600      |
| C (16H)–H (16R)      | 0. 9600      |
| C (17C)–H (17G)      | 0. 9600      |
| C (17C)–H (17H)      | 0. 9600      |
| C (17C)–H (17I)      | 0. 9600      |
| C (18C)–H (18X)      | 0. 9600      |
| C (18C)–H (18Y)      | 0. 9600      |
| C (18C)–H (18Z)      | 0. 9600      |
| C (20C)–C (21C)      | 1. 496 (9)   |
| C (20C)–C (22C)      | 1. 509 (10)  |
| C (20C)–C (23C)      | 1. 542 (10)  |
| C (21C)–H (21J)      | 0. 9600      |
| C (21C)–H (21K)      | 0. 9600      |
| C (21C)–H (21L)      | 0. 9600      |
| C (22C)–H (22J)      | 0. 9600      |
| C (22C)–H (22K)      | 0. 9600      |
| C (22C)–H (22L)      | 0. 9600      |
| C (23C)–H (23J)      | 0. 9600      |
| C (23C)–H (23K)      | 0. 9600      |
| C (23C)–H (23L)      | 0. 9600      |
| C (14)–Pd (1)–C (19) | 174. 59 (19) |
| C (14)–Pd (1)–C (8)  | 92. 10 (19)  |
| C (19)–Pd (1)–C (8)  | 92. 75 (19)  |

|                         |              |
|-------------------------|--------------|
| C (14)–Pd (1)–Cl (1)    | 85. 61 (14)  |
| C (19)–Pd (1)–Cl (1)    | 89. 61 (14)  |
| C (8)–Pd (1)–Cl (1)     | 177. 19 (14) |
| C (14A)–PdA–C (19A)     | 175. 9 (2)   |
| C (14A)–PdA–C (8A)      | 91. 9 (2)    |
| C (19A)–PdA–C (8A)      | 91. 2 (2)    |
| C (14A)–PdA–Cl (1A)     | 86. 46 (15)  |
| C (19A)–PdA–Cl (1A)     | 90. 61 (15)  |
| C (8A)–PdA–Cl (1A)      | 177. 51 (16) |
| C (19B)–Pd (1B)–C (14B) | 176. 4 (2)   |
| C (19B)–Pd (1B)–C (8B)  | 91. 6 (2)    |
| C (14B)–Pd (1B)–C (8B)  | 91. 1 (2)    |
| C (19B)–Pd (1B)–Cl (1B) | 86. 10 (15)  |
| C (14B)–Pd (1B)–Cl (1B) | 91. 27 (17)  |
| C (8B)–Pd (1B)–Cl (1B)  | 176. 66 (14) |
| C (19C)–Pd (1C)–C (14C) | 174. 7 (2)   |
| C (19C)–Pd (1C)–C (8C)  | 92. 5 (2)    |
| C (14C)–Pd (1C)–C (8C)  | 92. 1 (2)    |
| C (19C)–Pd (1C)–Cl (1C) | 86. 04 (15)  |
| C (14C)–Pd (1C)–Cl (1C) | 89. 53 (15)  |
| C (8C)–Pd (1C)–Cl (1C)  | 177. 05 (15) |
| C (1)–N (1)–C (8)       | 118. 3 (4)   |
| C (1)–N (1)–C (10)      | 119. 3 (5)   |
| C (8)–N (1)–C (10)      | 121. 9 (5)   |
| C (8)–N (2)–O (2)       | 112. 0 (4)   |
| C (14)–N (3)–C (15)     | 171. 4 (5)   |
| C (19)–N (4)–C (20)     | 176. 6 (5)   |
| C (1A)–N (1A)–C (8A)    | 117. 8 (4)   |
| C (1A)–N (1A)–C (10A)   | 120. 5 (5)   |
| C (8A)–N (1A)–C (10A)   | 121. 4 (4)   |
| C (8A)–N (2A)–O (2A)    | 111. 8 (5)   |
| C (14A)–N (3A)–C (15A)  | 169. 1 (5)   |
| C (19A)–N (4A)–C (20A)  | 175. 5 (6)   |
| C (1B)–N (1B)–C (8B)    | 117. 9 (4)   |
| C (1B)–N (1B)–C (10B)   | 120. 9 (5)   |
| C (8B)–N (1B)–C (10B)   | 120. 4 (5)   |
| C (8B)–N (2B)–O (2B)    | 113. 0 (5)   |
| C (14B)–N (3B)–C (15B)  | 174. 7 (6)   |
| C (19B)–N (4B)–C (20B)  | 170. 8 (5)   |
| C (1C)–N (1C)–C (8C)    | 119. 0 (4)   |
| C (1C)–N (1C)–C (10C)   | 120. 3 (5)   |
| C (8C)–N (1C)–C (10C)   | 119. 9 (5)   |
| C (8C)–N (2C)–O (2C)    | 112. 8 (5)   |
| C (14C)–N (3C)–C (15C)  | 177. 1 (5)   |
| C (19C)–N (4C)–C (20C)  | 170. 3 (6)   |
| N (2)–O (2)–C (9)       | 108. 7 (5)   |
| C (9A)–O (2A)–N (2A)    | 108. 0 (5)   |

|                     |           |
|---------------------|-----------|
| N(2B)-O(2B)-C(9B)   | 108.4(5)  |
| C(9C)-O(2C)-N(2C)   | 106.6(5)  |
| O(1)-C(1)-N(1)      | 125.9(6)  |
| O(1)-C(1)-C(2)      | 118.0(6)  |
| N(1)-C(1)-C(2)      | 116.1(5)  |
| C(7)-C(2)-C(3)      | 114.4(7)  |
| C(7)-C(2)-C(1)      | 125.7(7)  |
| C(3)-C(2)-C(1)      | 119.6(7)  |
| F(2)-C(3)-C(2)      | 120.3(7)  |
| F(2)-C(3)-C(4)      | 116.3(10) |
| C(2)-C(3)-C(4)      | 123.5(9)  |
| C(5)-C(4)-C(3)      | 116.7(9)  |
| C(5)-C(4)-H(4)      | 121.6     |
| C(3)-C(4)-H(4)      | 121.6     |
| C(6)-C(5)-C(4)      | 122.3(9)  |
| C(6)-C(5)-H(5)      | 118.9     |
| C(4)-C(5)-H(5)      | 118.9     |
| C(5)-C(6)-C(7)      | 116.5(8)  |
| C(5)-C(6)-H(6)      | 121.8     |
| C(7)-C(6)-H(6)      | 121.8     |
| F(1)-C(7)-C(2)      | 116.0(7)  |
| F(1)-C(7)-C(6)      | 117.4(8)  |
| C(2)-C(7)-C(6)      | 126.6(8)  |
| N(2)-C(8)-N(1)      | 112.9(4)  |
| N(2)-C(8)-Pd(1)     | 126.8(4)  |
| N(1)-C(8)-Pd(1)     | 120.3(3)  |
| O(2)-C(9)-H(9A)     | 109.5     |
| O(2)-C(9)-H(9B)     | 109.5     |
| H(9A)-C(9)-H(9B)    | 109.5     |
| O(2)-C(9)-H(9C)     | 109.5     |
| H(9A)-C(9)-H(9C)    | 109.5     |
| H(9B)-C(9)-H(9C)    | 109.5     |
| C(12)-C(10)-C(13)   | 107.4(6)  |
| C(12)-C(10)-N(1)    | 109.9(5)  |
| C(13)-C(10)-N(1)    | 110.3(6)  |
| C(12)-C(10)-C(11)   | 109.8(7)  |
| C(13)-C(10)-C(11)   | 110.8(6)  |
| N(1)-C(10)-C(11)    | 108.7(5)  |
| C(10)-C(11)-H(11A)  | 109.5     |
| C(10)-C(11)-H(11B)  | 109.5     |
| H(11A)-C(11)-H(11B) | 109.5     |
| C(10)-C(11)-H(11C)  | 109.5     |
| H(11A)-C(11)-H(11C) | 109.5     |
| H(11B)-C(11)-H(11C) | 109.5     |
| C(10)-C(12)-H(12A)  | 109.5     |
| C(10)-C(12)-H(12B)  | 109.5     |
| H(12A)-C(12)-H(12B) | 109.5     |

|                     |          |
|---------------------|----------|
| C(10)-C(12)-H(12C)  | 109.5    |
| H(12A)-C(12)-H(12C) | 109.5    |
| H(12B)-C(12)-H(12C) | 109.5    |
| C(10)-C(13)-H(13A)  | 109.5    |
| C(10)-C(13)-H(13B)  | 109.5    |
| H(13A)-C(13)-H(13B) | 109.5    |
| C(10)-C(13)-H(13C)  | 109.5    |
| H(13A)-C(13)-H(13C) | 109.5    |
| H(13B)-C(13)-H(13C) | 109.5    |
| N(3)-C(14)-Pd(1)    | 171.3(4) |
| N(3)-C(15)-C(17)    | 109.5(4) |
| N(3)-C(15)-C(18)    | 106.6(4) |
| C(17)-C(15)-C(18)   | 111.8(5) |
| N(3)-C(15)-C(16)    | 107.3(5) |
| C(17)-C(15)-C(16)   | 111.1(5) |
| C(18)-C(15)-C(16)   | 110.4(5) |
| C(15)-C(16)-H(16A)  | 109.5    |
| C(15)-C(16)-H(16B)  | 109.5    |
| H(16A)-C(16)-H(16B) | 109.5    |
| C(15)-C(16)-H(16C)  | 109.5    |
| H(16A)-C(16)-H(16C) | 109.5    |
| H(16B)-C(16)-H(16C) | 109.5    |
| C(15)-C(17)-H(17A)  | 109.5    |
| C(15)-C(17)-H(17B)  | 109.5    |
| H(17A)-C(17)-H(17B) | 109.5    |
| C(15)-C(17)-H(17C)  | 109.5    |
| H(17A)-C(17)-H(17C) | 109.5    |
| H(17B)-C(17)-H(17C) | 109.5    |
| C(15)-C(18)-H(18A)  | 109.5    |
| C(15)-C(18)-H(18B)  | 109.5    |
| H(18A)-C(18)-H(18B) | 109.5    |
| C(15)-C(18)-H(18C)  | 109.5    |
| H(18A)-C(18)-H(18C) | 109.5    |
| H(18B)-C(18)-H(18C) | 109.5    |
| N(4)-C(19)-Pd(1)    | 173.5(4) |
| N(4)-C(20)-C(23)    | 106.8(5) |
| N(4)-C(20)-C(21)    | 108.4(5) |
| C(23)-C(20)-C(21)   | 111.2(7) |
| N(4)-C(20)-C(22)    | 106.9(4) |
| C(23)-C(20)-C(22)   | 110.5(6) |
| C(21)-C(20)-C(22)   | 112.7(8) |
| C(20)-C(21)-H(21A)  | 109.5    |
| C(20)-C(21)-H(21B)  | 109.5    |
| H(21A)-C(21)-H(21B) | 109.5    |
| C(20)-C(21)-H(21C)  | 109.5    |
| H(21A)-C(21)-H(21C) | 109.5    |
| H(21B)-C(21)-H(21C) | 109.5    |

|                           |           |
|---------------------------|-----------|
| C (20) -C (22) -H (22A)   | 109.5     |
| C (20) -C (22) -H (22B)   | 109.5     |
| H (22A) -C (22) -H (22B)  | 109.5     |
| C (20) -C (22) -H (22C)   | 109.5     |
| H (22A) -C (22) -H (22C)  | 109.5     |
| H (22B) -C (22) -H (22C)  | 109.5     |
| C (20) -C (23) -H (23A)   | 109.5     |
| C (20) -C (23) -H (23B)   | 109.5     |
| H (23A) -C (23) -H (23B)  | 109.5     |
| C (20) -C (23) -H (23C)   | 109.5     |
| H (23A) -C (23) -H (23C)  | 109.5     |
| H (23B) -C (23) -H (23C)  | 109.5     |
| O (1A) -C (1A) -N (1A)    | 124.9 (6) |
| O (1A) -C (1A) -C (2A)    | 116.7 (6) |
| N (1A) -C (1A) -C (2A)    | 118.4 (5) |
| C (7A) -C (2A) -C (3A)    | 115.3 (6) |
| C (7A) -C (2A) -C (1A)    | 122.8 (7) |
| C (3A) -C (2A) -C (1A)    | 121.6 (6) |
| C (4A) -C (3A) -F (2A)    | 117.2 (8) |
| C (4A) -C (3A) -C (2A)    | 125.5 (9) |
| F (2A) -C (3A) -C (2A)    | 117.3 (6) |
| C (5A) -C (4A) -C (3A)    | 116.9 (9) |
| C (5A) -C (4A) -H (4A)    | 121.6     |
| C (3A) -C (4A) -H (4A)    | 121.6     |
| C (4A) -C (5A) -C (6A)    | 124.0 (8) |
| C (4A) -C (5A) -H (5A)    | 118.0     |
| C (6A) -C (5A) -H (5A)    | 118.0     |
| C (5A) -C (6A) -C (7A)    | 113.7 (8) |
| C (5A) -C (6A) -H (6A)    | 123.1     |
| C (7A) -C (6A) -H (6A)    | 123.1     |
| C (2A) -C (7A) -F (1A)    | 118.3 (6) |
| C (2A) -C (7A) -C (6A)    | 124.6 (8) |
| F (1A) -C (7A) -C (6A)    | 117.1 (8) |
| N (2A) -C (8A) -N (1A)    | 112.9 (5) |
| N (2A) -C (8A) -PdA       | 126.5 (4) |
| N (1A) -C (8A) -PdA       | 120.5 (4) |
| O (2A) -C (9A) -H (9A1)   | 109.5     |
| O (2A) -C (9A) -H (9A2)   | 109.5     |
| H (9A1) -C (9A) -H (9A2)  | 109.5     |
| O (2A) -C (9A) -H (9A3)   | 109.5     |
| H (9A1) -C (9A) -H (9A3)  | 109.5     |
| H (9A2) -C (9A) -H (9A3)  | 109.5     |
| C (11A) -C (10A) -C (12A) | 108.4 (6) |
| C (11A) -C (10A) -N (1A)  | 108.2 (5) |
| C (12A) -C (10A) -N (1A)  | 109.0 (5) |
| C (11A) -C (10A) -C (13A) | 110.9 (6) |
| C (12A) -C (10A) -C (13A) | 112.4 (7) |

|                      |          |
|----------------------|----------|
| N(1A)-C(10A)-C(13A)  | 107.8(6) |
| C(10A)-C(11A)-H(11D) | 109.5    |
| C(10A)-C(11A)-H(11E) | 109.5    |
| H(11D)-C(11A)-H(11E) | 109.5    |
| C(10A)-C(11A)-H(11F) | 109.5    |
| H(11D)-C(11A)-H(11F) | 109.5    |
| H(11E)-C(11A)-H(11F) | 109.5    |
| C(10A)-C(12A)-H(12D) | 109.5    |
| C(10A)-C(12A)-H(12E) | 109.5    |
| H(12D)-C(12A)-H(12E) | 109.5    |
| C(10A)-C(12A)-H(12F) | 109.5    |
| H(12D)-C(12A)-H(12F) | 109.5    |
| H(12E)-C(12A)-H(12F) | 109.5    |
| C(10A)-C(13A)-H(13D) | 109.5    |
| C(10A)-C(13A)-H(13E) | 109.5    |
| H(13D)-C(13A)-H(13E) | 109.5    |
| C(10A)-C(13A)-H(13F) | 109.5    |
| H(13D)-C(13A)-H(13F) | 109.5    |
| H(13E)-C(13A)-H(13F) | 109.5    |
| N(3A)-C(14A)-PdA     | 171.8(5) |
| N(3A)-C(15A)-C(18A)  | 107.4(5) |
| N(3A)-C(15A)-C(16A)  | 106.8(5) |
| C(18A)-C(15A)-C(16A) | 110.5(7) |
| N(3A)-C(15A)-C(17A)  | 106.4(5) |
| C(18A)-C(15A)-C(17A) | 111.9(6) |
| C(16A)-C(15A)-C(17A) | 113.4(6) |
| C(15A)-C(16A)-H(16D) | 109.5    |
| C(15A)-C(16A)-H(16E) | 109.5    |
| H(16D)-C(16A)-H(16E) | 109.5    |
| C(15A)-C(16A)-H(16F) | 109.5    |
| H(16D)-C(16A)-H(16F) | 109.5    |
| H(16E)-C(16A)-H(16F) | 109.5    |
| C(15A)-C(17A)-H(17D) | 109.5    |
| C(15A)-C(17A)-H(17E) | 109.5    |
| H(17D)-C(17A)-H(17E) | 109.5    |
| C(15A)-C(17A)-H(17F) | 109.5    |
| H(17D)-C(17A)-H(17F) | 109.5    |
| H(17E)-C(17A)-H(17F) | 109.5    |
| C(15A)-C(18A)-H(18D) | 109.5    |
| C(15A)-C(18A)-H(18E) | 109.5    |
| H(18D)-C(18A)-H(18E) | 109.5    |
| C(15A)-C(18A)-H(18F) | 109.5    |
| H(18D)-C(18A)-H(18F) | 109.5    |
| H(18E)-C(18A)-H(18F) | 109.5    |
| N(4A)-C(19A)-PdA     | 174.4(5) |
| C(23A)-C(20A)-N(4A)  | 110.0(7) |
| C(23A)-C(20A)-C(21A) | 129.3(9) |



|                      |          |
|----------------------|----------|
| N(4A)-C(20A)-C(21A)  | 109.0(7) |
| C(23A)-C(20A)-C(22A) | 102.5(9) |
| N(4A)-C(20A)-C(22A)  | 106.4(7) |
| C(21A)-C(20A)-C(22A) | 96.2(8)  |
| C(20A)-C(21A)-H(21D) | 109.5    |
| C(20A)-C(21A)-H(21E) | 109.5    |
| H(21D)-C(21A)-H(21E) | 109.5    |
| C(20A)-C(21A)-H(21F) | 109.5    |
| H(21D)-C(21A)-H(21F) | 109.5    |
| H(21E)-C(21A)-H(21F) | 109.5    |
| C(20A)-C(22A)-H(22D) | 108.1    |
| C(20A)-C(22A)-H(22E) | 112.8    |
| H(22D)-C(22A)-H(22E) | 109.5    |
| C(20A)-C(22A)-H(22F) | 107.4    |
| H(22D)-C(22A)-H(22F) | 109.5    |
| H(22E)-C(22A)-H(22F) | 109.5    |
| C(20A)-C(23A)-H(23D) | 114.3    |
| C(20A)-C(23A)-H(23E) | 112.7    |
| H(23D)-C(23A)-H(23E) | 109.5    |
| C(20A)-C(23A)-H(23F) | 101.0    |
| H(23D)-C(23A)-H(23F) | 109.5    |
| H(23E)-C(23A)-H(23F) | 109.5    |
| O(1B)-C(1B)-N(1B)    | 125.4(6) |
| O(1B)-C(1B)-C(2B)    | 117.1(6) |
| N(1B)-C(1B)-C(2B)    | 117.4(5) |
| C(3B)-C(2B)-C(7B)    | 115.6(6) |
| C(3B)-C(2B)-C(1B)    | 121.9(6) |
| C(7B)-C(2B)-C(1B)    | 121.9(5) |
| F(1B)-C(3B)-C(2B)    | 118.4(6) |
| F(1B)-C(3B)-C(4B)    | 118.9(6) |
| C(2B)-C(3B)-C(4B)    | 122.7(7) |
| C(5B)-C(4B)-C(3B)    | 118.7(7) |
| C(5B)-C(4B)-H(4B)    | 120.7    |
| C(3B)-C(4B)-H(4B)    | 120.7    |
| C(4B)-C(5B)-C(6B)    | 122.2(7) |
| C(4B)-C(5B)-H(5B)    | 118.9    |
| C(6B)-C(5B)-H(5B)    | 118.9    |
| C(7B)-C(6B)-C(5B)    | 115.8(7) |
| C(7B)-C(6B)-H(6B)    | 122.1    |
| C(5B)-C(6B)-H(6B)    | 122.1    |
| F(2B)-C(7B)-C(6B)    | 117.0(6) |
| F(2B)-C(7B)-C(2B)    | 117.9(6) |
| C(6B)-C(7B)-C(2B)    | 125.0(6) |
| N(2B)-C(8B)-N(1B)    | 112.7(5) |
| N(2B)-C(8B)-Pd(1B)   | 127.8(4) |
| N(1B)-C(8B)-Pd(1B)   | 119.4(3) |
| O(2B)-C(9B)-H(9B1)   | 109.5    |

|                      |           |
|----------------------|-----------|
| O(2B)-C(9B)-H(9B2)   | 109.5     |
| H(9B1)-C(9B)-H(9B2)  | 109.5     |
| O(2B)-C(9B)-H(9B3)   | 109.5     |
| H(9B1)-C(9B)-H(9B3)  | 109.5     |
| H(9B2)-C(9B)-H(9B3)  | 109.5     |
| C(11B)-C(10B)-N(1B)  | 108.5(6)  |
| C(11B)-C(10B)-C(12B) | 113.6(7)  |
| N(1B)-C(10B)-C(12B)  | 109.5(5)  |
| C(11B)-C(10B)-C(13B) | 110.2(6)  |
| N(1B)-C(10B)-C(13B)  | 108.4(5)  |
| C(12B)-C(10B)-C(13B) | 106.4(6)  |
| C(10B)-C(11B)-H(11G) | 109.5     |
| C(10B)-C(11B)-H(11H) | 109.5     |
| H(11G)-C(11B)-H(11H) | 109.5     |
| C(10B)-C(11B)-H(11I) | 109.5     |
| H(11G)-C(11B)-H(11I) | 109.5     |
| H(11H)-C(11B)-H(11I) | 109.5     |
| C(10B)-C(12B)-H(12G) | 109.5     |
| C(10B)-C(12B)-H(12H) | 109.5     |
| H(12G)-C(12B)-H(12H) | 109.5     |
| C(10B)-C(12B)-H(12I) | 109.5     |
| H(12G)-C(12B)-H(12I) | 109.5     |
| H(12H)-C(12B)-H(12I) | 109.5     |
| C(10B)-C(13B)-H(13G) | 109.5     |
| C(10B)-C(13B)-H(13H) | 109.5     |
| H(13G)-C(13B)-H(13H) | 109.5     |
| C(10B)-C(13B)-H(13I) | 109.5     |
| H(13G)-C(13B)-H(13I) | 109.5     |
| H(13H)-C(13B)-H(13I) | 109.5     |
| N(3B)-C(14B)-Pd(1B)  | 176.0(5)  |
| C(16D)-C(15B)-C(17D) | 133(2)    |
| C(16D)-C(15B)-N(3B)  | 110.9(16) |
| C(17D)-C(15B)-N(3B)  | 111.8(15) |
| C(16D)-C(15B)-C(18B) | 136.6(19) |
| C(17D)-C(15B)-C(18B) | 34.8(19)  |
| N(3B)-C(15B)-C(18B)  | 109.0(9)  |
| C(16D)-C(15B)-C(16B) | 26(3)     |
| C(17D)-C(15B)-C(16B) | 138.6(16) |
| N(3B)-C(15B)-C(16B)  | 108.9(9)  |
| C(18B)-C(15B)-C(16B) | 121.8(15) |
| C(16D)-C(15B)-C(17B) | 80(2)     |
| C(17D)-C(15B)-C(17B) | 71.0(18)  |
| N(3B)-C(15B)-C(17B)  | 105.0(7)  |
| C(18B)-C(15B)-C(17B) | 105.2(11) |
| C(16B)-C(15B)-C(17B) | 105.6(14) |
| C(16D)-C(15B)-C(18D) | 93(2)     |
| C(17D)-C(15B)-C(18D) | 100(2)    |

|                      |          |
|----------------------|----------|
| N(3B)-C(15B)-C(18D)  | 97.2(9)  |
| C(18B)-C(15B)-C(18D) | 65.3(15) |
| C(16B)-C(15B)-C(18D) | 67.6(18) |
| C(17B)-C(15B)-C(18D) | 157.8(8) |
| C(15B)-C(16B)-H(16G) | 109.5    |
| C(15B)-C(16B)-H(16H) | 109.5    |
| C(15B)-C(16B)-H(16I) | 109.5    |
| C(15B)-C(17B)-H(17Y) | 109.5    |
| C(15B)-C(17B)-H(17X) | 109.5    |
| C(15B)-C(17B)-H(17Z) | 109.5    |
| C(15B)-C(18B)-H(18G) | 109.5    |
| C(15B)-C(18B)-H(18H) | 109.5    |
| C(15B)-C(18B)-H(18I) | 109.5    |
| C(15B)-C(16D)-H(16J) | 109.5    |
| C(15B)-C(16D)-H(16K) | 109.5    |
| H(16J)-C(16D)-H(16K) | 109.5    |
| C(15B)-C(16D)-H(16L) | 109.5    |
| H(16J)-C(16D)-H(16L) | 109.5    |
| H(16K)-C(16D)-H(16L) | 109.5    |
| C(15B)-C(18D)-H(18J) | 109.1    |
| C(15B)-C(18D)-H(18K) | 109.4    |
| H(18J)-C(18D)-H(18K) | 109.5    |
| C(15B)-C(18D)-H(18L) | 110.0    |
| H(18J)-C(18D)-H(18L) | 109.5    |
| H(18K)-C(18D)-H(18L) | 109.5    |
| C(15B)-C(17D)-H(17J) | 109.5    |
| C(15B)-C(17D)-H(17K) | 109.5    |
| H(17J)-C(17D)-H(17K) | 109.5    |
| C(15B)-C(17D)-H(17L) | 109.5    |
| H(17J)-C(17D)-H(17L) | 109.5    |
| H(17K)-C(17D)-H(17L) | 109.5    |
| N(4B)-C(19B)-Pd(1B)  | 172.2(5) |
| N(4B)-C(20B)-C(23B)  | 106.4(5) |
| N(4B)-C(20B)-C(21B)  | 107.4(5) |
| C(23B)-C(20B)-C(21B) | 111.7(6) |
| N(4B)-C(20B)-C(22B)  | 106.7(5) |
| C(23B)-C(20B)-C(22B) | 112.2(6) |
| C(21B)-C(20B)-C(22B) | 111.9(5) |
| C(20B)-C(21B)-H(21G) | 109.5    |
| C(20B)-C(21B)-H(21H) | 109.5    |
| H(21G)-C(21B)-H(21H) | 109.5    |
| C(20B)-C(21B)-H(21I) | 109.5    |
| H(21G)-C(21B)-H(21I) | 109.5    |
| H(21H)-C(21B)-H(21I) | 109.5    |
| C(20B)-C(22B)-H(22G) | 109.5    |
| C(20B)-C(22B)-H(22H) | 109.5    |
| H(22G)-C(22B)-H(22H) | 109.5    |

|                         |            |
|-------------------------|------------|
| C (20B)–C (22B)–H (22I) | 109. 5     |
| H (22G)–C (22B)–H (22I) | 109. 5     |
| H (22H)–C (22B)–H (22I) | 109. 5     |
| C (20B)–C (23B)–H (23G) | 109. 5     |
| C (20B)–C (23B)–H (23H) | 109. 5     |
| H (23G)–C (23B)–H (23H) | 109. 5     |
| C (20B)–C (23B)–H (23I) | 109. 5     |
| H (23G)–C (23B)–H (23I) | 109. 5     |
| H (23H)–C (23B)–H (23I) | 109. 5     |
| O (1C)–C (1C)–N (1C)    | 126. 8 (6) |
| O (1C)–C (1C)–C (2C)    | 117. 4 (6) |
| N (1C)–C (1C)–C (2C)    | 115. 8 (5) |
| C (7C)–C (2C)–C (3C)    | 114. 6 (6) |
| C (7C)–C (2C)–C (1C)    | 122. 7 (6) |
| C (3C)–C (2C)–C (1C)    | 122. 4 (6) |
| F (1C)–C (3C)–C (4C)    | 122. 1 (7) |
| F (1C)–C (3C)–C (2C)    | 116. 1 (6) |
| C (4C)–C (3C)–C (2C)    | 121. 8 (7) |
| C (5C)–C (4C)–C (3C)    | 120. 2 (7) |
| C (5C)–C (4C)–H (4C)    | 119. 9     |
| C (3C)–C (4C)–H (4C)    | 119. 9     |
| C (4C)–C (5C)–C (6C)    | 120. 5 (7) |
| C (4C)–C (5C)–H (5C)    | 119. 7     |
| C (6C)–C (5C)–H (5C)    | 119. 7     |
| C (5C)–C (6C)–C (7C)    | 119. 4 (7) |
| C (5C)–C (6C)–H (6C)    | 120. 3     |
| C (7C)–C (6C)–H (6C)    | 120. 3     |
| F (2C)–C (7C)–C (6C)    | 119. 5 (7) |
| F (2C)–C (7C)–C (2C)    | 117. 1 (6) |
| C (6C)–C (7C)–C (2C)    | 123. 4 (7) |
| N (2C)–C (8C)–N (1C)    | 113. 9 (5) |
| N (2C)–C (8C)–Pd (1C)   | 127. 3 (4) |
| N (1C)–C (8C)–Pd (1C)   | 118. 7 (3) |
| O (2C)–C (9C)–H (9C1)   | 109. 5     |
| O (2C)–C (9C)–H (9C2)   | 109. 5     |
| H (9C1)–C (9C)–H (9C2)  | 109. 5     |
| O (2C)–C (9C)–H (9C3)   | 109. 5     |
| H (9C1)–C (9C)–H (9C3)  | 109. 5     |
| H (9C2)–C (9C)–H (9C3)  | 109. 5     |
| C (13C)–C (10C)–N (1C)  | 110. 8 (5) |
| C (13C)–C (10C)–C (12C) | 108. 8 (7) |
| N (1C)–C (10C)–C (12C)  | 108. 9 (5) |
| C (13C)–C (10C)–C (11C) | 109. 6 (6) |
| N (1C)–C (10C)–C (11C)  | 107. 3 (6) |
| C (12C)–C (10C)–C (11C) | 111. 4 (6) |
| C (10C)–C (11C)–H (11J) | 109. 5     |
| C (10C)–C (11C)–H (11K) | 109. 5     |

|                      |           |
|----------------------|-----------|
| H(11J)-C(11C)-H(11K) | 109.5     |
| C(10C)-C(11C)-H(11L) | 109.5     |
| H(11J)-C(11C)-H(11L) | 109.5     |
| H(11K)-C(11C)-H(11L) | 109.5     |
| C(10C)-C(12C)-H(12J) | 109.5     |
| C(10C)-C(12C)-H(12K) | 109.5     |
| H(12J)-C(12C)-H(12K) | 109.5     |
| C(10C)-C(12C)-H(12L) | 109.5     |
| H(12J)-C(12C)-H(12L) | 109.5     |
| H(12K)-C(12C)-H(12L) | 109.5     |
| C(10C)-C(13C)-H(13J) | 109.5     |
| C(10C)-C(13C)-H(13K) | 109.5     |
| H(13J)-C(13C)-H(13K) | 109.5     |
| C(10C)-C(13C)-H(13L) | 109.5     |
| H(13J)-C(13C)-H(13L) | 109.5     |
| H(13K)-C(13C)-H(13L) | 109.5     |
| N(3C)-C(14C)-Pd(1C)  | 171.4(5)  |
| N(3C)-C(15C)-C(18C)  | 108.4(5)  |
| N(3C)-C(15C)-C(17C)  | 106.0(5)  |
| C(18C)-C(15C)-C(17C) | 105.3(8)  |
| N(3C)-C(15C)-C(16C)  | 108.6(6)  |
| C(18C)-C(15C)-C(16C) | 101.1(8)  |
| C(17C)-C(15C)-C(16C) | 126.3(8)  |
| N(3C)-C(15C)-C(16H)  | 106.4(8)  |
| C(18C)-C(15C)-C(16H) | 139.9(10) |
| C(17C)-C(15C)-C(16H) | 83.4(10)  |
| C(16C)-C(15C)-C(16H) | 48.2(8)   |
| C(15C)-C(16C)-H(16M) | 109.5     |
| C(15C)-C(16C)-H(16N) | 109.5     |
| C(15C)-C(16C)-H(16O) | 109.5     |
| C(15C)-C(16H)-H(16P) | 109.5     |
| C(15C)-C(16H)-H(16Q) | 109.5     |
| H(16P)-C(16H)-H(16Q) | 109.5     |
| C(15C)-C(16H)-H(16R) | 109.5     |
| H(16P)-C(16H)-H(16R) | 109.5     |
| H(16Q)-C(16H)-H(16R) | 109.5     |
| C(15C)-C(17C)-H(17G) | 109.5     |
| C(15C)-C(17C)-H(17H) | 109.5     |
| H(17G)-C(17C)-H(17H) | 109.5     |
| C(15C)-C(17C)-H(17I) | 109.5     |
| H(17G)-C(17C)-H(17I) | 109.5     |
| H(17H)-C(17C)-H(17I) | 109.5     |
| C(15C)-C(18C)-H(18X) | 109.5     |
| C(15C)-C(18C)-H(18Y) | 109.5     |
| H(18X)-C(18C)-H(18Y) | 109.5     |
| C(15C)-C(18C)-H(18Z) | 109.5     |
| H(18X)-C(18C)-H(18Z) | 109.5     |

|                      |          |
|----------------------|----------|
| H(18Y)-C(18C)-H(18Z) | 109.5    |
| N(4C)-C(19C)-Pd(1C)  | 171.6(5) |
| N(4C)-C(20C)-C(21C)  | 108.7(5) |
| N(4C)-C(20C)-C(22C)  | 107.2(5) |
| C(21C)-C(20C)-C(22C) | 112.1(6) |
| N(4C)-C(20C)-C(23C)  | 105.9(5) |
| C(21C)-C(20C)-C(23C) | 112.2(6) |
| C(22C)-C(20C)-C(23C) | 110.3(6) |
| C(20C)-C(21C)-H(21J) | 109.5    |
| C(20C)-C(21C)-H(21K) | 109.5    |
| H(21J)-C(21C)-H(21K) | 109.5    |
| C(20C)-C(21C)-H(21L) | 109.5    |
| H(21J)-C(21C)-H(21L) | 109.5    |
| H(21K)-C(21C)-H(21L) | 109.5    |
| C(20C)-C(22C)-H(22J) | 109.5    |
| C(20C)-C(22C)-H(22K) | 109.5    |
| H(22J)-C(22C)-H(22K) | 109.5    |
| C(20C)-C(22C)-H(22L) | 109.5    |
| H(22J)-C(22C)-H(22L) | 109.5    |
| H(22K)-C(22C)-H(22L) | 109.5    |
| C(20C)-C(23C)-H(23J) | 109.5    |
| C(20C)-C(23C)-H(23K) | 109.5    |
| H(23J)-C(23C)-H(23K) | 109.5    |
| C(20C)-C(23C)-H(23L) | 109.5    |
| H(23J)-C(23C)-H(23L) | 109.5    |
| H(23K)-C(23C)-H(23L) | 109.5    |

---

Symmetry transformations used to generate equivalent atoms:

Table 4. Anisotropic displacement parameters ( $\text{\AA}^2 \times 10^3$ ) for cd213256. The anisotropic displacement factor exponent takes the form:  
 $-2 \pi^2 [ h^2 a^{*2} U_{11} + \dots + 2 h k a^* b^* U_{12} ]$

---

|        | U11   | U22   | U33   | U23    | U13   | U12    |
|--------|-------|-------|-------|--------|-------|--------|
| Pd(1)  | 40(1) | 39(1) | 58(1) | 3(1)   | 1(1)  | 4(1)   |
| PdA    | 39(1) | 40(1) | 66(1) | 0(1)   | 1(1)  | -5(1)  |
| Pd(1B) | 40(1) | 41(1) | 66(1) | 3(1)   | 7(1)  | -5(1)  |
| Pd(1C) | 39(1) | 39(1) | 61(1) | -1(1)  | 7(1)  | 5(1)   |
| Cl(1)  | 88(1) | 87(1) | 63(1) | -9(1)  | 10(1) | 16(1)  |
| Cl(1A) | 87(1) | 91(1) | 79(1) | 1(1)   | 23(1) | -13(1) |
| Cl(1B) | 89(1) | 82(1) | 82(1) | -19(1) | -2(1) | -13(1) |

|        |         |        |         |        |        |        |
|--------|---------|--------|---------|--------|--------|--------|
| C1(1C) | 90(1)   | 82(1)  | 76(1)   | 22(1)  | 11(1)  | 18(1)  |
| F(1)   | 126(4)  | 94(3)  | 169(5)  | 30(3)  | 32(3)  | -3(3)  |
| F(2)   | 75(2)   | 133(4) | 146(4)  | 2(3)   | -19(2) | 15(2)  |
| F(1A)  | 74(2)   | 137(4) | 112(3)  | -2(3)  | -20(2) | -12(2) |
| F(2A)  | 129(4)  | 120(4) | 129(4)  | -32(3) | 27(3)  | 11(3)  |
| F(1B)  | 130(3)  | 79(2)  | 85(2)   | 16(2)  | 22(2)  | -18(2) |
| F(2B)  | 104(3)  | 142(4) | 94(3)   | -15(3) | 29(2)  | 12(3)  |
| F(1C)  | 118(3)  | 78(2)  | 86(2)   | -10(2) | 10(2)  | 20(2)  |
| F(2C)  | 100(3)  | 124(3) | 88(3)   | 2(2)   | 26(2)  | -19(2) |
| N(1)   | 53(2)   | 52(2)  | 73(3)   | 0(2)   | 17(2)  | 9(2)   |
| N(2)   | 67(3)   | 65(3)  | 58(3)   | 9(2)   | 7(2)   | 11(2)  |
| N(3)   | 61(2)   | 50(2)  | 57(2)   | 11(2)  | -1(2)  | 10(2)  |
| N(4)   | 54(2)   | 42(2)  | 84(3)   | 7(2)   | 2(2)   | 1(2)   |
| N(1A)  | 48(2)   | 62(3)  | 71(3)   | 17(2)  | -2(2)  | -13(2) |
| N(2A)  | 72(3)   | 98(4)  | 66(3)   | 9(2)   | -5(2)  | -28(3) |
| N(3A)  | 65(3)   | 47(2)  | 78(3)   | -2(2)  | -2(2)  | -11(2) |
| N(4A)  | 60(2)   | 44(2)  | 92(3)   | -4(2)  | -6(2)  | -6(2)  |
| N(1B)  | 64(3)   | 56(3)  | 58(2)   | 0(2)   | 2(2)   | -13(2) |
| N(2B)  | 72(3)   | 82(3)  | 65(3)   | 16(2)  | 6(2)   | -20(3) |
| N(3B)  | 44(2)   | 67(3)  | 124(4)  | 25(3)  | 11(2)  | -1(2)  |
| N(4B)  | 53(2)   | 65(3)  | 67(3)   | 5(2)   | 7(2)   | -10(2) |
| N(1C)  | 62(3)   | 52(3)  | 61(2)   | 4(2)   | -5(2)  | 15(2)  |
| N(2C)  | 80(3)   | 74(3)  | 61(3)   | -8(2)  | 4(2)   | 16(3)  |
| N(3C)  | 41(2)   | 56(2)  | 85(3)   | -7(2)  | 9(2)   | 5(2)   |
| N(4C)  | 45(2)   | 62(3)  | 80(3)   | -3(2)  | 15(2)  | 10(2)  |
| O(1)   | 60(3)   | 109(4) | 235(7)  | -39(4) | 58(4)  | -7(3)  |
| O(2)   | 67(2)   | 82(3)  | 64(2)   | 6(2)   | -9(2)  | 18(2)  |
| O(1A)  | 47(2)   | 141(5) | 158(5)  | 58(4)  | 24(3)  | -1(2)  |
| O(2A)  | 60(2)   | 132(4) | 77(3)   | 20(2)  | -21(2) | -34(3) |
| O(1B)  | 131(4)  | 56(3)  | 153(5)  | -23(3) | -40(4) | -9(3)  |
| O(2B)  | 89(3)   | 76(3)  | 84(3)   | 28(2)  | -3(2)  | -16(2) |
| O(1C)  | 139(4)  | 49(2)  | 117(4)  | 11(2)  | -24(3) | 8(3)   |
| O(2C)  | 103(3)  | 76(3)  | 86(3)   | -38(2) | 1(2)   | 22(2)  |
| C(1)   | 67(4)   | 65(3)  | 117(5)  | -3(3)  | 37(4)  | 11(3)  |
| C(2)   | 50(3)   | 63(4)  | 110(5)  | -13(3) | 16(3)  | -9(3)  |
| C(3)   | 42(3)   | 89(5)  | 161(8)  | -17(5) | 6(4)   | -8(3)  |
| C(4)   | 67(4)   | 122(7) | 132(6)  | -40(5) | -10(4) | -27(4) |
| C(5)   | 61(4)   | 81(5)  | 208(11) | -31(6) | 20(6)  | -20(4) |
| C(6)   | 61(4)   | 61(4)  | 192(9)  | 3(5)   | 26(5)  | -13(3) |
| C(7)   | 73(4)   | 65(4)  | 119(6)  | 4(4)   | 22(4)  | -14(3) |
| C(8)   | 47(2)   | 37(2)  | 59(3)   | 10(2)  | 7(2)   | 9(2)   |
| C(9)   | 99(5)   | 126(6) | 72(4)   | -5(4)  | -24(3) | 17(4)  |
| C(10)  | 85(4)   | 69(3)  | 75(4)   | -6(3)  | 33(3)  | 21(3)  |
| C(11)  | 213(10) | 107(6) | 87(5)   | 5(4)   | 63(6)  | 34(6)  |
| C(12)  | 107(5)  | 63(4)  | 98(5)   | -13(3) | 13(4)  | 5(4)   |
| C(13)  | 89(4)   | 83(4)  | 125(6)  | 9(4)   | 8(4)   | 33(4)  |
| C(14)  | 46(3)   | 54(3)  | 60(3)   | 3(2)   | 7(2)   | 5(2)   |

|         |         |          |          |         |         |          |
|---------|---------|----------|----------|---------|---------|----------|
| C (15)  | 72 (3)  | 59 (3)   | 56 (3)   | 16 (2)  | -1 (2)  | 23 (3)   |
| C (16)  | 77 (4)  | 69 (4)   | 130 (6)  | 23 (4)  | 13 (4)  | 5 (3)    |
| C (17)  | 78 (4)  | 88 (5)   | 89 (4)   | 21 (3)  | 7 (3)   | 31 (3)   |
| C (18)  | 116 (6) | 97 (5)   | 69 (4)   | 5 (3)   | -9 (4)  | 33 (4)   |
| C (19)  | 48 (2)  | 41 (2)   | 67 (3)   | 0 (2)   | 8 (2)   | -3 (2)   |
| C (20)  | 65 (3)  | 36 (2)   | 86 (3)   | 10 (2)  | -8 (3)  | 6 (2)    |
| C (21)  | 92 (6)  | 48 (4)   | 480 (20) | 69 (8)  | -54 (9) | -20 (4)  |
| C (22)  | 113 (6) | 71 (4)   | 118 (5)  | -7 (4)  | 24 (4)  | 31 (4)   |
| C (23)  | 134 (7) | 98 (5)   | 97 (5)   | 24 (4)  | -21 (4) | 25 (5)   |
| C (1A)  | 55 (3)  | 90 (4)   | 92 (4)   | 16 (3)  | 13 (3)  | 4 (3)    |
| C (2A)  | 43 (3)  | 73 (4)   | 83 (4)   | 21 (3)  | 12 (3)  | 4 (3)    |
| C (3A)  | 67 (4)  | 78 (5)   | 122 (6)  | 12 (4)  | 27 (4)  | 18 (3)   |
| C (4A)  | 78 (4)  | 75 (4)   | 174 (8)  | 30 (5)  | 35 (5)  | 25 (4)   |
| C (5A)  | 72 (5)  | 94 (6)   | 217 (11) | 74 (7)  | 37 (6)  | 23 (4)   |
| C (6A)  | 67 (4)  | 140 (7)  | 102 (5)  | 55 (5)  | 11 (3)  | 15 (4)   |
| C (7A)  | 50 (3)  | 90 (5)   | 93 (5)   | 14 (4)  | -4 (3)  | -2 (3)   |
| C (8A)  | 51 (3)  | 53 (3)   | 63 (3)   | 7 (2)   | -7 (2)  | -8 (2)   |
| C (9A)  | 130 (7) | 338 (17) | 89 (6)   | 31 (7)  | -40 (5) | -134 (9) |
| C (10A) | 80 (4)  | 86 (4)   | 76 (4)   | 26 (3)  | -11 (3) | -34 (3)  |
| C (11A) | 83 (4)  | 88 (5)   | 141 (6)  | 38 (4)  | -16 (4) | -44 (4)  |
| C (12A) | 104 (6) | 91 (5)   | 166 (8)  | 78 (5)  | -37 (5) | -22 (4)  |
| C (13A) | 164 (8) | 167 (8)  | 71 (4)   | 33 (5)  | 18 (5)  | -50 (7)  |
| C (14A) | 48 (3)  | 48 (3)   | 67 (3)   | 2 (2)   | 0 (2)   | -11 (2)  |
| C (15A) | 86 (4)  | 61 (3)   | 74 (4)   | -5 (3)  | -4 (3)  | -14 (3)  |
| C (16A) | 171 (9) | 132 (7)  | 83 (5)   | -17 (4) | -8 (5)  | -57 (6)  |
| C (17A) | 79 (4)  | 79 (4)   | 137 (6)  | -20 (4) | -14 (4) | -29 (3)  |
| C (18A) | 115 (6) | 73 (4)   | 153 (7)  | -33 (4) | 10 (5)  | -3 (4)   |
| C (19A) | 43 (2)  | 46 (3)   | 80 (3)   | -2 (2)  | 1 (2)   | -5 (2)   |
| C (20A) | 101 (4) | 47 (3)   | 208 (6)  | -10 (4) | -31 (4) | -25 (3)  |
| C (21A) | 130 (6) | 93 (5)   | 211 (8)  | -28 (5) | -46 (6) | -37 (5)  |
| C (22A) | 120 (6) | 91 (5)   | 239 (8)  | -7 (5)  | -3 (6)  | -44 (5)  |
| C (23A) | 138 (6) | 58 (4)   | 274 (8)  | 3 (5)   | -34 (6) | -15 (4)  |
| C (1B)  | 80 (4)  | 61 (4)   | 73 (3)   | -14 (3) | 1 (3)   | -4 (3)   |
| C (2B)  | 75 (4)  | 42 (3)   | 66 (4)   | -7 (2)  | -8 (3)  | 4 (3)    |
| C (3B)  | 96 (5)  | 46 (3)   | 74 (4)   | 7 (3)   | -4 (3)  | -7 (3)   |
| C (4B)  | 146 (7) | 60 (4)   | 73 (4)   | -2 (3)  | -33 (4) | 5 (4)    |
| C (5B)  | 92 (5)  | 70 (4)   | 146 (8)  | -12 (4) | -42 (5) | 17 (4)   |
| C (6B)  | 68 (4)  | 69 (4)   | 127 (6)  | -15 (4) | -4 (4)  | 16 (3)   |
| C (7B)  | 70 (4)  | 71 (4)   | 79 (4)   | -10 (3) | 5 (3)   | 17 (3)   |
| C (8B)  | 46 (3)  | 46 (3)   | 62 (3)   | 5 (2)   | 4 (2)   | -8 (2)   |
| C (9B)  | 130 (6) | 122 (6)  | 107 (5)  | 63 (5)  | 9 (5)   | -30 (5)  |
| C (10B) | 83 (4)  | 89 (4)   | 66 (4)   | 4 (3)   | -6 (3)  | -37 (4)  |
| C (11B) | 143 (7) | 158 (8)  | 73 (5)   | -13 (4) | -17 (5) | -54 (6)  |
| C (12B) | 75 (4)  | 121 (6)  | 110 (5)  | 31 (5)  | -27 (4) | -26 (4)  |
| C (13B) | 95 (5)  | 96 (5)   | 109 (5)  | 8 (4)   | 7 (4)   | -40 (4)  |
| C (14B) | 37 (2)  | 53 (3)   | 91 (4)   | 7 (2)   | 8 (2)   | 1 (2)    |
| C (15B) | 38 (3)  | 119 (6)  | 189 (8)  | 87 (6)  | 26 (4)  | -4 (3)   |



|         |          |          |          |          |          |           |
|---------|----------|----------|----------|----------|----------|-----------|
| C (16B) | 33 (6)   | 104 (14) | 280 (20) | 59 (15)  | 34 (8)   | 26 (6)    |
| C (17B) | 48 (5)   | 51 (5)   | 211 (15) | 5 (7)    | 13 (7)   | -18 (4)   |
| C (18B) | 104 (8)  | 195 (19) | 98 (12)  | 48 (13)  | 37 (11)  | -44 (10)  |
| C (16D) | 38 (10)  | 125 (17) | 280 (20) | 74 (17)  | 20 (11)  | -1 (10)   |
| C (18D) | 130 (20) | 240 (30) | 210 (30) | -80 (30) | 100 (20) | -100 (20) |
| C (17D) | 99 (9)   | 200 (20) | 128 (16) | 54 (16)  | 40 (14)  | -39 (11)  |
| C (19B) | 52 (3)   | 46 (3)   | 61 (3)   | -1 (2)   | 6 (2)    | -8 (2)    |
| C (20B) | 53 (3)   | 78 (3)   | 63 (3)   | 9 (3)    | 15 (2)   | -22 (3)   |
| C (21B) | 60 (4)   | 93 (5)   | 119 (5)  | -8 (4)   | 19 (4)   | 6 (3)     |
| C (22B) | 68 (3)   | 77 (4)   | 104 (5)  | 12 (3)   | 15 (3)   | -22 (3)   |
| C (23B) | 102 (5)  | 150 (7)  | 68 (4)   | 0 (4)    | 13 (4)   | -30 (5)   |
| C (1C)  | 85 (4)   | 54 (3)   | 60 (3)   | 0 (2)    | -2 (3)   | 13 (3)    |
| C (2C)  | 69 (4)   | 38 (3)   | 78 (4)   | 3 (2)    | -5 (3)   | -9 (2)    |
| C (3C)  | 87 (4)   | 48 (3)   | 80 (4)   | -1 (3)   | -4 (3)   | -2 (3)    |
| C (4C)  | 106 (5)  | 71 (4)   | 91 (4)   | 4 (3)    | -33 (4)  | -13 (4)   |
| C (5C)  | 72 (4)   | 65 (4)   | 138 (7)  | 12 (4)   | -31 (4)  | -4 (3)    |
| C (6C)  | 64 (4)   | 63 (4)   | 156 (7)  | 10 (4)   | 2 (4)    | -16 (3)   |
| C (7C)  | 69 (4)   | 50 (3)   | 97 (5)   | 5 (3)    | 5 (3)    | -14 (3)   |
| C (8C)  | 47 (3)   | 55 (3)   | 59 (3)   | -2 (2)   | 2 (2)    | 1 (2)     |
| C (9C)  | 146 (7)  | 149 (7)  | 83 (4)   | -50 (4)  | -13 (4)  | 65 (6)    |
| C (10C) | 73 (4)   | 79 (4)   | 73 (4)   | 10 (3)   | -15 (3)  | 16 (3)    |
| C (11C) | 152 (8)  | 132 (7)  | 69 (4)   | 25 (4)   | -13 (4)  | 20 (6)    |
| C (12C) | 93 (5)   | 131 (7)  | 113 (6)  | 4 (5)    | -7 (4)   | 61 (5)    |
| C (13C) | 71 (4)   | 109 (6)  | 130 (6)  | 4 (5)    | -40 (4)  | 17 (4)    |
| C (14C) | 43 (2)   | 44 (2)   | 72 (3)   | -2 (2)   | 7 (2)    | -1 (2)    |
| C (15C) | 39 (2)   | 75 (4)   | 92 (4)   | -2 (3)   | 14 (2)   | 12 (2)    |
| C (16C) | 28 (4)   | 80 (6)   | 179 (11) | -7 (8)   | -4 (6)   | -9 (4)    |
| C (16H) | 53 (7)   | 88 (8)   | 193 (13) | -38 (10) | 19 (9)   | -18 (6)   |
| C (17C) | 120 (7)  | 220 (12) | 127 (8)  | -48 (7)  | 17 (6)   | 89 (8)    |
| C (18C) | 98 (6)   | 170 (9)  | 136 (7)  | 45 (6)   | 8 (5)    | 65 (6)    |
| C (19C) | 51 (3)   | 48 (3)   | 61 (3)   | -6 (2)   | -1 (2)   | 4 (2)     |
| C (20C) | 55 (3)   | 86 (4)   | 82 (4)   | -6 (3)   | 18 (3)   | 16 (3)    |
| C (21C) | 86 (4)   | 84 (4)   | 125 (6)  | 2 (4)    | 39 (4)   | 25 (4)    |
| C (22C) | 67 (4)   | 100 (5)  | 154 (7)  | -7 (5)   | 34 (4)   | 0 (4)     |
| C (23C) | 120 (6)  | 142 (7)  | 76 (4)   | -8 (4)   | 13 (4)   | 40 (6)    |

Table 5. Hydrogen coordinates ( $\times 10^4$ ) and isotropic displacement parameters ( $\text{\AA}^2 \times 10^3$ ) for cd213256.

|      | x   | y    | z    | U(eq) |
|------|-----|------|------|-------|
| H(4) | 0   | 3350 | 4347 | 128   |
| H(5) | 305 | 2325 | 4697 | 140   |

|        |      |      |      |     |
|--------|------|------|------|-----|
| H(6)   | 402  | 2317 | 5401 | 125 |
| H(9A)  | 2389 | 4801 | 6407 | 149 |
| H(9B)  | 2919 | 4285 | 6182 | 149 |
| H(9C)  | 2173 | 4002 | 6332 | 149 |
| H(11A) | -202 | 6077 | 6402 | 203 |
| H(11B) | 343  | 5439 | 6419 | 203 |
| H(11C) | -448 | 5310 | 6267 | 203 |
| H(12A) | 737  | 6698 | 5978 | 134 |
| H(12B) | 967  | 6371 | 5555 | 134 |
| H(12C) | 1218 | 6012 | 5967 | 134 |
| H(13A) | -868 | 6009 | 5668 | 149 |
| H(13B) | -331 | 6175 | 5313 | 149 |
| H(13C) | -396 | 6701 | 5686 | 149 |
| H(16A) | 1276 | 7446 | 4742 | 138 |
| H(16B) | 1191 | 7719 | 4289 | 138 |
| H(16C) | 1753 | 7122 | 4394 | 138 |
| H(17A) | -353 | 6621 | 4464 | 128 |
| H(17B) | -152 | 7375 | 4291 | 128 |
| H(17C) | -10  | 7196 | 4755 | 128 |
| H(18A) | 1240 | 6343 | 3876 | 141 |
| H(18B) | 613  | 6862 | 3755 | 141 |
| H(18C) | 443  | 6082 | 3899 | 141 |
| H(21A) | 1649 | 2014 | 5481 | 309 |
| H(21B) | 2266 | 1494 | 5352 | 309 |
| H(21C) | 1798 | 1875 | 5015 | 309 |
| H(22A) | 2853 | 2547 | 4679 | 151 |
| H(22B) | 3299 | 2012 | 4949 | 151 |
| H(22C) | 3449 | 2834 | 4980 | 151 |
| H(23A) | 3230 | 3017 | 5677 | 165 |
| H(23B) | 3153 | 2195 | 5756 | 165 |
| H(23C) | 2545 | 2718 | 5894 | 165 |
| H(4A)  | 3867 | -262 | 7638 | 131 |
| H(5A)  | 3934 | -173 | 8328 | 153 |
| H(6A)  | 4238 | 906  | 8662 | 124 |
| H(9A1) | 1821 | 2329 | 6512 | 278 |
| H(9A2) | 1397 | 1680 | 6693 | 278 |
| H(9A3) | 2165 | 1565 | 6512 | 278 |
| H(11D) | 4548 | 3780 | 7492 | 156 |
| H(11E) | 4960 | 3887 | 7079 | 156 |
| H(11F) | 5113 | 3213 | 7352 | 156 |
| H(12D) | 3405 | 3822 | 7261 | 181 |
| H(12E) | 3099 | 3338 | 6908 | 181 |
| H(12F) | 3593 | 3989 | 6802 | 181 |
| H(13D) | 4498 | 3286 | 6430 | 201 |
| H(13E) | 4078 | 2567 | 6485 | 201 |
| H(13F) | 4875 | 2630 | 6639 | 201 |
| H(16D) | 2996 | 3804 | 8965 | 193 |

|        |       |       |      |     |
|--------|-------|-------|------|-----|
| H(16E) | 3568  | 4384  | 9083 | 193 |
| H(16F) | 3816  | 3620  | 8947 | 193 |
| H(17D) | 4561  | 4128  | 8348 | 148 |
| H(17E) | 4363  | 4891  | 8509 | 148 |
| H(17F) | 4189  | 4678  | 8053 | 148 |
| H(18D) | 2896  | 4895  | 8092 | 170 |
| H(18E) | 2987  | 5193  | 8540 | 170 |
| H(18F) | 2444  | 4571  | 8451 | 170 |
| H(21D) | 1548  | 210   | 6986 | 218 |
| H(21E) | 971   | 535   | 7280 | 218 |
| H(21F) | 965   | -285  | 7183 | 218 |
| H(22D) | 970   | -566  | 7925 | 225 |
| H(22E) | 717   | 225   | 7860 | 225 |
| H(22F) | 1325  | 52    | 8181 | 225 |
| H(23D) | 1921  | -1015 | 7753 | 235 |
| H(23E) | 2549  | -494  | 7869 | 235 |
| H(23F) | 2395  | -679  | 7407 | 235 |
| H(4B)  | 9886  | 1633  | 8667 | 112 |
| H(5B)  | 10950 | 1882  | 8355 | 124 |
| H(6B)  | 11034 | 1935  | 7643 | 106 |
| H(9B1) | 9207  | 3604  | 6490 | 179 |
| H(9B2) | 8960  | 4364  | 6631 | 179 |
| H(9B3) | 8393  | 3815  | 6464 | 179 |
| H(11G) | 7966  | 1780  | 6511 | 187 |
| H(11H) | 7350  | 1211  | 6533 | 187 |
| H(11I) | 8118  | 1026  | 6703 | 187 |
| H(12G) | 6905  | 2440  | 7338 | 153 |
| H(12H) | 6676  | 2241  | 6887 | 153 |
| H(12I) | 7344  | 2733  | 6965 | 153 |
| H(13G) | 7436  | 682   | 7350 | 150 |
| H(13H) | 6712  | 986   | 7175 | 150 |
| H(13I) | 7028  | 1281  | 7590 | 150 |
| H(16G) | 11886 | 3798  | 7575 | 208 |
| H(16H) | 11425 | 3133  | 7448 | 208 |
| H(16I) | 11439 | 3390  | 7907 | 208 |
| H(17Y) | 10951 | 4504  | 8143 | 155 |
| H(17X) | 10431 | 4968  | 7872 | 155 |
| H(17Z) | 11260 | 5001  | 7800 | 155 |
| H(18G) | 11106 | 4678  | 7065 | 198 |
| H(18H) | 10275 | 4691  | 7136 | 198 |
| H(18I) | 10630 | 4035  | 6918 | 198 |
| H(16J) | 11748 | 3931  | 7605 | 223 |
| H(16K) | 11271 | 3313  | 7779 | 223 |
| H(16L) | 11307 | 4050  | 8007 | 223 |
| H(18J) | 11161 | 3784  | 6866 | 289 |
| H(18K) | 10629 | 3191  | 7014 | 289 |
| H(18L) | 11433 | 3175  | 7159 | 289 |

|        |       |       |      |     |
|--------|-------|-------|------|-----|
| H(17J) | 10250 | 4815  | 7475 | 211 |
| H(17K) | 10596 | 4516  | 7073 | 211 |
| H(17L) | 11072 | 4921  | 7397 | 211 |
| H(21G) | 6183  | 3402  | 8493 | 136 |
| H(21H) | 5573  | 2839  | 8561 | 136 |
| H(21I) | 5900  | 2941  | 8123 | 136 |
| H(22G) | 6163  | 1629  | 8109 | 124 |
| H(22H) | 5902  | 1510  | 8561 | 124 |
| H(22I) | 6685  | 1299  | 8438 | 124 |
| H(23G) | 7210  | 2098  | 8984 | 160 |
| H(23H) | 6430  | 2289  | 9123 | 160 |
| H(23I) | 6966  | 2898  | 9004 | 160 |
| H(4C)  | -787  | -784  | 4238 | 107 |
| H(5C)  | -1812 | -531  | 4575 | 110 |
| H(6C)  | -1816 | -470  | 5277 | 113 |
| H(9C1) | -443  | 1032  | 6265 | 189 |
| H(9C2) | -18   | 1754  | 6270 | 189 |
| H(9C3) | 322   | 1069  | 6468 | 189 |
| H(11J) | 1758  | -1322 | 6375 | 177 |
| H(11K) | 1030  | -1552 | 6169 | 177 |
| H(11L) | 1098  | -804  | 6382 | 177 |
| H(12J) | 2036  | -1221 | 5279 | 169 |
| H(12K) | 1870  | -1825 | 5598 | 169 |
| H(12L) | 2539  | -1329 | 5663 | 169 |
| H(13J) | 2113  | 75    | 5640 | 155 |
| H(13K) | 2461  | -291  | 6027 | 155 |
| H(13L) | 1749  | 148   | 6071 | 155 |
| H(16M) | -2276 | 1096  | 4826 | 143 |
| H(16N) | -2682 | 1319  | 5226 | 143 |
| H(16O) | -2161 | 661   | 5233 | 143 |
| H(16P) | -2223 | 702   | 5345 | 167 |
| H(16Q) | -2535 | 1368  | 5574 | 167 |
| H(16R) | -1850 | 981   | 5747 | 167 |
| H(17G) | -1169 | 1787  | 5806 | 234 |
| H(17H) | -1976 | 2022  | 5783 | 234 |
| H(17I) | -1382 | 2501  | 5585 | 234 |
| H(18X) | -1265 | 2491  | 4926 | 202 |
| H(18Y) | -2103 | 2471  | 4965 | 202 |
| H(18Z) | -1717 | 1970  | 4650 | 202 |
| H(21J) | 3009  | -893  | 4789 | 147 |
| H(21K) | 3300  | -971  | 4341 | 147 |
| H(21L) | 2512  | -1201 | 4441 | 147 |
| H(22J) | 2998  | 898   | 4442 | 160 |
| H(22K) | 3603  | 352   | 4328 | 160 |
| H(22L) | 3330  | 401   | 4782 | 160 |
| H(23J) | 1966  | -371  | 3910 | 169 |
| H(23K) | 2748  | -184  | 3773 | 169 |

Table 6. Torsion angles [deg] for cd213256.

---

|                         |           |
|-------------------------|-----------|
| C(8)-N(2)-O(2)-C(9)     | -170.4(5) |
| C(8A)-N(2A)-O(2A)-C(9A) | -174.9(8) |
| C(8B)-N(2B)-O(2B)-C(9B) | 176.1(6)  |
| C(8C)-N(2C)-O(2C)-C(9C) | 164.0(6)  |
| C(8)-N(1)-C(1)-O(1)     | 166.4(7)  |
| C(10)-N(1)-C(1)-O(1)    | -5.4(11)  |
| C(8)-N(1)-C(1)-C(2)     | -10.2(8)  |
| C(10)-N(1)-C(1)-C(2)    | 178.0(6)  |
| O(1)-C(1)-C(2)-C(7)     | -88.1(10) |
| N(1)-C(1)-C(2)-C(7)     | 88.8(8)   |
| O(1)-C(1)-C(2)-C(3)     | 86.3(9)   |
| N(1)-C(1)-C(2)-C(3)     | -96.8(8)  |
| C(7)-C(2)-C(3)-F(2)     | -179.8(5) |
| C(1)-C(2)-C(3)-F(2)     | 5.2(9)    |
| C(7)-C(2)-C(3)-C(4)     | -1.2(10)  |
| C(1)-C(2)-C(3)-C(4)     | -176.2(6) |
| F(2)-C(3)-C(4)-C(5)     | 179.7(6)  |
| C(2)-C(3)-C(4)-C(5)     | 1.0(10)   |
| C(3)-C(4)-C(5)-C(6)     | -0.4(11)  |
| C(4)-C(5)-C(6)-C(7)     | 0.0(11)   |
| C(3)-C(2)-C(7)-F(1)     | -179.5(6) |
| C(1)-C(2)-C(7)-F(1)     | -4.9(10)  |
| C(3)-C(2)-C(7)-C(6)     | 0.9(10)   |
| C(1)-C(2)-C(7)-C(6)     | 175.5(6)  |
| C(5)-C(6)-C(7)-F(1)     | -179.9(6) |
| C(5)-C(6)-C(7)-C(2)     | -0.3(11)  |
| O(2)-N(2)-C(8)-N(1)     | -172.8(4) |
| O(2)-N(2)-C(8)-Pd(1)    | 4.5(6)    |
| C(1)-N(1)-C(8)-N(2)     | -113.9(6) |
| C(10)-N(1)-C(8)-N(2)    | 57.7(6)   |
| C(1)-N(1)-C(8)-Pd(1)    | 68.7(6)   |
| C(10)-N(1)-C(8)-Pd(1)   | -119.7(5) |
| C(14)-Pd(1)-C(8)-N(2)   | -129.6(5) |
| C(19)-Pd(1)-C(8)-N(2)   | 48.0(5)   |
| C1(1)-Pd(1)-C(8)-N(2)   | -165(3)   |
| C(14)-Pd(1)-C(8)-N(1)   | 47.5(4)   |
| C(19)-Pd(1)-C(8)-N(1)   | -134.9(4) |
| C1(1)-Pd(1)-C(8)-N(1)   | 12(3)     |
| C(1)-N(1)-C(10)-C(12)   | -168.6(6) |
| C(8)-N(1)-C(10)-C(12)   | 19.9(7)   |
| C(1)-N(1)-C(10)-C(13)   | -50.3(7)  |

|                          |           |
|--------------------------|-----------|
| C(8)-N(1)-C(10)-C(13)    | 138.1(5)  |
| C(1)-N(1)-C(10)-C(11)    | 71.3(8)   |
| C(8)-N(1)-C(10)-C(11)    | -100.2(7) |
| C(15)-N(3)-C(14)-Pd(1)   | -17(6)    |
| C(19)-Pd(1)-C(14)-N(3)   | 40(4)     |
| C(8)-Pd(1)-C(14)-N(3)    | -167(3)   |
| C1(1)-Pd(1)-C(14)-N(3)   | 12(3)     |
| C(14)-N(3)-C(15)-C(17)   | 146(3)    |
| C(14)-N(3)-C(15)-C(18)   | 24(4)     |
| C(14)-N(3)-C(15)-C(16)   | -94(4)    |
| C(20)-N(4)-C(19)-Pd(1)   | 59(11)    |
| C(14)-Pd(1)-C(19)-N(4)   | -4(6)     |
| C(8)-Pd(1)-C(19)-N(4)    | -157(4)   |
| C1(1)-Pd(1)-C(19)-N(4)   | 24(4)     |
| C(19)-N(4)-C(20)-C(23)   | 57(9)     |
| C(19)-N(4)-C(20)-C(21)   | 177(100)  |
| C(19)-N(4)-C(20)-C(22)   | -61(9)    |
| C(8A)-N(1A)-C(1A)-O(1A)  | 170.2(7)  |
| C(10A)-N(1A)-C(1A)-O(1A) | -2.5(11)  |
| C(8A)-N(1A)-C(1A)-C(2A)  | -11.9(9)  |
| C(10A)-N(1A)-C(1A)-C(2A) | 175.4(6)  |
| O(1A)-C(1A)-C(2A)-C(7A)  | 79.6(9)   |
| N(1A)-C(1A)-C(2A)-C(7A)  | -98.5(8)  |
| O(1A)-C(1A)-C(2A)-C(3A)  | -93.3(8)  |
| N(1A)-C(1A)-C(2A)-C(3A)  | 88.6(8)   |
| C(7A)-C(2A)-C(3A)-C(4A)  | -0.8(10)  |
| C(1A)-C(2A)-C(3A)-C(4A)  | 172.6(6)  |
| C(7A)-C(2A)-C(3A)-F(2A)  | 179.0(5)  |
| C(1A)-C(2A)-C(3A)-F(2A)  | -7.6(9)   |
| F(2A)-C(3A)-C(4A)-C(5A)  | -178.5(6) |
| C(2A)-C(3A)-C(4A)-C(5A)  | 1.3(11)   |
| C(3A)-C(4A)-C(5A)-C(6A)  | -1.1(12)  |
| C(4A)-C(5A)-C(6A)-C(7A)  | 0.4(11)   |
| C(3A)-C(2A)-C(7A)-F(1A)  | 179.9(5)  |
| C(1A)-C(2A)-C(7A)-F(1A)  | 6.6(9)    |
| C(3A)-C(2A)-C(7A)-C(6A)  | 0.0(10)   |
| C(1A)-C(2A)-C(7A)-C(6A)  | -173.4(6) |
| C(5A)-C(6A)-C(7A)-C(2A)  | 0.2(10)   |
| C(5A)-C(6A)-C(7A)-F(1A)  | -179.7(6) |
| O(2A)-N(2A)-C(8A)-N(1A)  | -173.7(5) |
| O(2A)-N(2A)-C(8A)-PdA    | 2.1(8)    |
| C(1A)-N(1A)-C(8A)-N(2A)  | -119.7(6) |
| C(10A)-N(1A)-C(8A)-N(2A) | 52.9(7)   |
| C(1A)-N(1A)-C(8A)-PdA    | 64.2(6)   |
| C(10A)-N(1A)-C(8A)-PdA   | -123.2(5) |
| C(14A)-PdA-C(8A)-N(2A)   | -126.1(6) |
| C(19A)-PdA-C(8A)-N(2A)   | 51.2(6)   |

|                                   |             |
|-----------------------------------|-------------|
| C1 (1A) -PdA-C (8A) -N (2A)       | -174 (3)    |
| C (14A) -PdA-C (8A) -N (1A)       | 49. 5 (4)   |
| C (19A) -PdA-C (8A) -N (1A)       | -133. 3 (4) |
| C1 (1A) -PdA-C (8A) -N (1A)       | 2 (4)       |
| C (1A) -N (1A) -C (10A) -C (11A)  | -48. 4 (8)  |
| C (8A) -N (1A) -C (10A) -C (11A)  | 139. 2 (6)  |
| C (1A) -N (1A) -C (10A) -C (12A)  | -166. 1 (6) |
| C (8A) -N (1A) -C (10A) -C (12A)  | 21. 4 (8)   |
| C (1A) -N (1A) -C (10A) -C (13A)  | 71. 6 (8)   |
| C (8A) -N (1A) -C (10A) -C (13A)  | -100. 8 (7) |
| C (15A) -N (3A) -C (14A) -PdA     | -15 (6)     |
| C (19A) -PdA-C (14A) -N (3A)      | 55 (5)      |
| C (8A) -PdA-C (14A) -N (3A)       | -167 (3)    |
| C1 (1A) -PdA-C (14A) -N (3A)      | 11 (3)      |
| C (14A) -N (3A) -C (15A) -C (18A) | -91 (3)     |
| C (14A) -N (3A) -C (15A) -C (16A) | 28 (3)      |
| C (14A) -N (3A) -C (15A) -C (17A) | 149 (3)     |
| C (20A) -N (4A) -C (19A) -PdA     | 93 (10)     |
| C (14A) -PdA-C (19A) -N (4A)      | -26 (7)     |
| C (8A) -PdA-C (19A) -N (4A)       | -164 (5)    |
| C1 (1A) -PdA-C (19A) -N (4A)      | 18 (5)      |
| C (19A) -N (4A) -C (20A) -C (23A) | 160 (8)     |
| C (19A) -N (4A) -C (20A) -C (21A) | 13 (9)      |
| C (19A) -N (4A) -C (20A) -C (22A) | -89 (9)     |
| C (8B) -N (1B) -C (1B) -O (1B)    | -168. 1 (6) |
| C (10B) -N (1B) -C (1B) -O (1B)   | 2. 1 (9)    |
| C (8B) -N (1B) -C (1B) -C (2B)    | 13. 9 (7)   |
| C (10B) -N (1B) -C (1B) -C (2B)   | -175. 9 (5) |
| O (1B) -C (1B) -C (2B) -C (3B)    | -78. 8 (8)  |
| N (1B) -C (1B) -C (2B) -C (3B)    | 99. 4 (7)   |
| O (1B) -C (1B) -C (2B) -C (7B)    | 91. 4 (8)   |
| N (1B) -C (1B) -C (2B) -C (7B)    | -90. 4 (7)  |
| C (7B) -C (2B) -C (3B) -F (1B)    | -179. 1 (5) |
| C (1B) -C (2B) -C (3B) -F (1B)    | -8. 3 (9)   |
| C (7B) -C (2B) -C (3B) -C (4B)    | 3. 4 (9)    |
| C (1B) -C (2B) -C (3B) -C (4B)    | 174. 2 (6)  |
| F (1B) -C (3B) -C (4B) -C (5B)    | 179. 4 (6)  |
| C (2B) -C (3B) -C (4B) -C (5B)    | -3. 1 (10)  |
| C (3B) -C (4B) -C (5B) -C (6B)    | 1. 2 (11)   |
| C (4B) -C (5B) -C (6B) -C (7B)    | 0. 0 (10)   |
| C (5B) -C (6B) -C (7B) -F (2B)    | 178. 2 (6)  |
| C (5B) -C (6B) -C (7B) -C (2B)    | 0. 5 (9)    |
| C (3B) -C (2B) -C (7B) -F (2B)    | -179. 8 (5) |
| C (1B) -C (2B) -C (7B) -F (2B)    | 9. 4 (9)    |
| C (3B) -C (2B) -C (7B) -C (6B)    | -2. 2 (9)   |
| C (1B) -C (2B) -C (7B) -C (6B)    | -173. 0 (6) |
| O (2B) -N (2B) -C (8B) -N (1B)    | 173. 8 (4)  |

|                            |           |
|----------------------------|-----------|
| O(2B)-N(2B)-C(8B)-Pd(1B)   | -2.7(7)   |
| C(1B)-N(1B)-C(8B)-N(2B)    | 117.6(6)  |
| C(10B)-N(1B)-C(8B)-N(2B)   | -52.7(7)  |
| C(1B)-N(1B)-C(8B)-Pd(1B)   | -65.6(6)  |
| C(10B)-N(1B)-C(8B)-Pd(1B)  | 124.2(4)  |
| C(19B)-Pd(1B)-C(8B)-N(2B)  | 128.2(5)  |
| C(14B)-Pd(1B)-C(8B)-N(2B)  | -49.6(5)  |
| Cl(1B)-Pd(1B)-C(8B)-N(2B)  | 174(2)    |
| C(19B)-Pd(1B)-C(8B)-N(1B)  | -48.2(4)  |
| C(14B)-Pd(1B)-C(8B)-N(1B)  | 134.1(4)  |
| Cl(1B)-Pd(1B)-C(8B)-N(1B)  | -2(3)     |
| C(1B)-N(1B)-C(10B)-C(11B)  | -70.7(7)  |
| C(8B)-N(1B)-C(10B)-C(11B)  | 99.3(7)   |
| C(1B)-N(1B)-C(10B)-C(12B)  | 164.8(5)  |
| C(8B)-N(1B)-C(10B)-C(12B)  | -25.3(7)  |
| C(1B)-N(1B)-C(10B)-C(13B)  | 49.1(8)   |
| C(8B)-N(1B)-C(10B)-C(13B)  | -141.0(6) |
| C(15B)-N(3B)-C(14B)-Pd(1B) | -70(12)   |
| C(19B)-Pd(1B)-C(14B)-N(3B) | 28(9)     |
| C(8B)-Pd(1B)-C(14B)-N(3B)  | 168(7)    |
| Cl(1B)-Pd(1B)-C(14B)-N(3B) | -14(7)    |
| C(14B)-N(3B)-C(15B)-C(16D) | 145(8)    |
| C(14B)-N(3B)-C(15B)-C(17D) | -16(9)    |
| C(14B)-N(3B)-C(15B)-C(18B) | -53(8)    |
| C(14B)-N(3B)-C(15B)-C(16B) | 172(8)    |
| C(14B)-N(3B)-C(15B)-C(17B) | 60(8)     |
| C(14B)-N(3B)-C(15B)-C(18D) | -119(8)   |
| C(20B)-N(4B)-C(19B)-Pd(1B) | 18(6)     |
| C(14B)-Pd(1B)-C(19B)-N(4B) | -53(6)    |
| C(8B)-Pd(1B)-C(19B)-N(4B)  | 167(3)    |
| Cl(1B)-Pd(1B)-C(19B)-N(4B) | -11(3)    |
| C(19B)-N(4B)-C(20B)-C(23B) | -28(4)    |
| C(19B)-N(4B)-C(20B)-C(21B) | 91(3)     |
| C(19B)-N(4B)-C(20B)-C(22B) | -149(3)   |
| C(8C)-N(1C)-C(1C)-O(1C)    | -171.1(6) |
| C(10C)-N(1C)-C(1C)-O(1C)   | -1.4(9)   |
| C(8C)-N(1C)-C(1C)-C(2C)    | 10.4(7)   |
| C(10C)-N(1C)-C(1C)-C(2C)   | -179.9(5) |
| O(1C)-C(1C)-C(2C)-C(7C)    | 96.8(7)   |
| N(1C)-C(1C)-C(2C)-C(7C)    | -84.6(7)  |
| O(1C)-C(1C)-C(2C)-C(3C)    | -78.0(8)  |
| N(1C)-C(1C)-C(2C)-C(3C)    | 100.6(6)  |
| C(7C)-C(2C)-C(3C)-F(1C)    | 179.9(5)  |
| C(1C)-C(2C)-C(3C)-F(1C)    | -4.9(8)   |
| C(7C)-C(2C)-C(3C)-C(4C)    | 0.2(9)    |
| C(1C)-C(2C)-C(3C)-C(4C)    | 175.4(6)  |
| F(1C)-C(3C)-C(4C)-C(5C)    | 179.5(6)  |



|                                   |             |
|-----------------------------------|-------------|
| C (2C) -C (3C) -C (4C) -C (5C)    | -0. 8 (10)  |
| C (3C) -C (4C) -C (5C) -C (6C)    | 2. 2 (10)   |
| C (4C) -C (5C) -C (6C) -C (7C)    | -3. 0 (10)  |
| C (5C) -C (6C) -C (7C) -F (2C)    | -177. 8 (6) |
| C (5C) -C (6C) -C (7C) -C (2C)    | 2. 4 (9)    |
| C (3C) -C (2C) -C (7C) -F (2C)    | 179. 2 (5)  |
| C (1C) -C (2C) -C (7C) -F (2C)    | 4. 0 (8)    |
| C (3C) -C (2C) -C (7C) -C (6C)    | -1. 0 (8)   |
| C (1C) -C (2C) -C (7C) -C (6C)    | -176. 2 (5) |
| O (2C) -N (2C) -C (8C) -N (1C)    | 174. 2 (4)  |
| O (2C) -N (2C) -C (8C) -Pd (1C)   | -4. 2 (7)   |
| C (1C) -N (1C) -C (8C) -N (2C)    | 113. 2 (6)  |
| C (10C) -N (1C) -C (8C) -N (2C)   | -56. 6 (7)  |
| C (1C) -N (1C) -C (8C) -Pd (1C)   | -68. 3 (5)  |
| C (10C) -N (1C) -C (8C) -Pd (1C)  | 121. 9 (5)  |
| C (19C) -Pd (1C) -C (8C) -N (2C)  | 132. 7 (5)  |
| C (14C) -Pd (1C) -C (8C) -N (2C)  | -44. 7 (5)  |
| Cl (1C) -Pd (1C) -C (8C) -N (2C)  | -167 (3)    |
| C (19C) -Pd (1C) -C (8C) -N (1C)  | -45. 6 (4)  |
| C (14C) -Pd (1C) -C (8C) -N (1C)  | 137. 0 (4)  |
| Cl (1C) -Pd (1C) -C (8C) -N (1C)  | 14 (3)      |
| C (1C) -N (1C) -C (10C) -C (13C)  | 172. 0 (6)  |
| C (8C) -N (1C) -C (10C) -C (13C)  | -18. 4 (8)  |
| C (1C) -N (1C) -C (10C) -C (12C)  | 52. 4 (7)   |
| C (8C) -N (1C) -C (10C) -C (12C)  | -138. 0 (6) |
| C (1C) -N (1C) -C (10C) -C (11C)  | -68. 3 (7)  |
| C (8C) -N (1C) -C (10C) -C (11C)  | 101. 3 (6)  |
| C (15C) -N (3C) -C (14C) -Pd (1C) | -101 (12)   |
| C (19C) -Pd (1C) -C (14C) -N (3C) | 26 (4)      |
| C (8C) -Pd (1C) -C (14C) -N (3C)  | 176 (3)     |
| Cl (1C) -Pd (1C) -C (14C) -N (3C) | -6 (3)      |
| C (14C) -N (3C) -C (15C) -C (18C) | 88 (12)     |
| C (14C) -N (3C) -C (15C) -C (17C) | -25 (12)    |
| C (14C) -N (3C) -C (15C) -C (16C) | -163 (12)   |
| C (14C) -N (3C) -C (15C) -C (16H) | -113 (12)   |
| C (20C) -N (4C) -C (19C) -Pd (1C) | 17 (6)      |
| C (14C) -Pd (1C) -C (19C) -N (4C) | -48 (4)     |
| C (8C) -Pd (1C) -C (19C) -N (4C)  | 162 (3)     |
| Cl (1C) -Pd (1C) -C (19C) -N (4C) | -16 (3)     |
| C (19C) -N (4C) -C (20C) -C (21C) | -144 (3)    |
| C (19C) -N (4C) -C (20C) -C (22C) | 94 (3)      |
| C (19C) -N (4C) -C (20C) -C (23C) | -23 (4)     |

---

Symmetry transformations used to generate equivalent atoms:

Table 7. Hydrogen bonds for cd213256 [A and deg.].

---

| D-H...A | d(D-H) | d(H...A) | d(D...A) | <(DHA) |
|---------|--------|----------|----------|--------|
|---------|--------|----------|----------|--------|

## 6.2 X-ray Crystallographic Data of Compound F

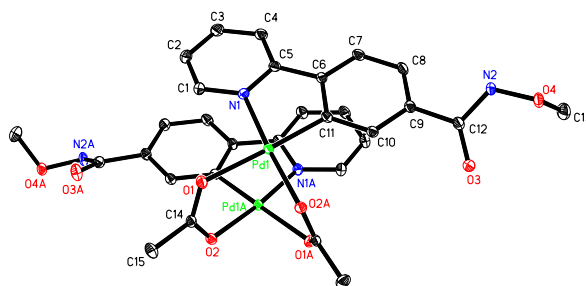

**F**

Table 1. Crystal data and structure refinement for mo\_dm14259\_0m.

|                      |                                                                                |          |
|----------------------|--------------------------------------------------------------------------------|----------|
| Identification code  | mo_dm14259_0m                                                                  |          |
| Empirical formula    | C <sub>34</sub> H <sub>36</sub> N <sub>4</sub> O <sub>12</sub> Pd <sub>2</sub> |          |
| Formula weight       | 905.47                                                                         |          |
| Temperature          | 153(2) K                                                                       |          |
| Wavelength           | 0.71073 Å                                                                      |          |
| Crystal system       | Monoclinic                                                                     |          |
| Space group          | C2/c                                                                           |          |
| Unit cell dimensions | a = 17.685(2) Å                                                                | α = 90°. |
| b = 11.2677(13) Å    | β = 106.035(2)°.                                                               |          |
| c = 18.973(2) Å      | γ = 90°.                                                                       |          |
| Volume               | 3633.8(7) Å <sup>3</sup>                                                       |          |

|                                   |                                             |
|-----------------------------------|---------------------------------------------|
| Z                                 | 4                                           |
| Density (calculated)              | 1.655 Mg/m <sup>3</sup>                     |
| Absorption coefficient            | 1.057 mm <sup>-1</sup>                      |
| F(000)                            | 1824                                        |
| Crystal size                      | 0.25 x 0.20 x 0.11 mm <sup>3</sup>          |
| Theta range for data collection   | 2.17 to 30.70°.                             |
| Index ranges                      | -25<=h<=25, -16<=k<=16, -27<=l<=26          |
| Reflections collected             | 18036                                       |
| Independent reflections           | 5571 [R(int) = 0.0453]                      |
| Completeness to theta = 30.70°    | 99.0 %                                      |
| Absorption correction             | Semi-empirical from equivalents             |
| Max. and min. transmission        | 0.8926 and 0.7780                           |
| Refinement method                 | Full-matrix least-squares on F <sup>2</sup> |
| Data / restraints / parameters    | 5571 / 0 / 238                              |
| Goodness-of-fit on F <sup>2</sup> | 0.985                                       |
| Final R indices [I>2sigma(I)]     | R1 = 0.0318, wR2 = 0.0680                   |
| R indices (all data)              | R1 = 0.0451, wR2 = 0.0733                   |
| Largest diff. peak and hole       | 1.118 and -0.819 e.Å <sup>-3</sup>          |

Table 2. Atomic coordinates ( $\times 10^4$ ) and equivalent isotropic displacement parameters ( $\text{\AA}^2 \times 10^3$ ) for mo\_dm14259\_0m.  $U(\text{eq})$  is defined as one third of the trace of the orthogonalized  $U^{ij}$  tensor.

|       | x        | y        | z       | U(eq) |
|-------|----------|----------|---------|-------|
| O(2)  | -948(1)  | 11803(1) | 7486(1) | 19(1) |
| Pd(1) | 416(1)   | 10331(1) | 6963(1) | 16(1) |
| O(1)  | -575(1)  | 11446(1) | 6468(1) | 21(1) |
| O(3)  | 3456(1)  | 10043(2) | 9014(1) | 30(1) |
| O(4)  | 4759(1)  | 8961(2)  | 8866(1) | 24(1) |
| O(5)  | 2524(1)  | 10549(2) | 5369(1) | 53(1) |
| O(6)  | 2407(1)  | 9019(2)  | 4613(1) | 38(1) |
| N(1)  | -56(1)   | 8804(2)  | 6504(1) | 19(1) |
| N(2)  | 4002(1)  | 8581(2)  | 8504(1) | 22(1) |
| C(1)  | -805(1)  | 8712(2)  | 6082(1) | 22(1) |
| C(2)  | -1148(1) | 7626(2)  | 5873(1) | 26(1) |
| C(3)  | -718(1)  | 6609(2)  | 6107(1) | 26(1) |
| C(4)  | 49(1)    | 6700(2)  | 6535(1) | 24(1) |
| C(5)  | 376(1)   | 7811(2)  | 6734(1) | 20(1) |
| C(6)  | 1163(1)  | 8074(2)  | 7213(1) | 18(1) |
| C(7)  | 1727(1)  | 7223(2)  | 7510(1) | 23(1) |
| C(8)  | 2453(1)  | 7560(2)  | 7970(1) | 23(1) |
| C(9)  | 2606(1)  | 8759(2)  | 8125(1) | 20(1) |

|       |          |          |         |       |
|-------|----------|----------|---------|-------|
| C(10) | 2036(1)  | 9614(2)  | 7842(1) | 19(1) |
| C(11) | 1309(1)  | 9284(2)  | 7380(1) | 17(1) |
| C(12) | 3383(1)  | 9184(2)  | 8595(1) | 22(1) |
| C(13) | 4996(2)  | 8474(3)  | 9586(1) | 35(1) |
| C(14) | -944(1)  | 12028(2) | 6826(1) | 19(1) |
| C(15) | -1415(1) | 13088(2) | 6476(1) | 28(1) |
| C(16) | 2233(2)  | 9615(2)  | 5147(2) | 32(1) |
| C(17) | 1624(2)  | 8995(3)  | 5428(2) | 41(1) |

---

Table 3. Bond lengths [ $\text{\AA}$ ] and angles [ $^\circ$ ] for mo\_dm14259\_0m.

---

|               |            |
|---------------|------------|
| O(2)-C(14)    | 1.280(3)   |
| O(2)-Pd(1)#1  | 2.0466(15) |
| Pd(1)-C(11)   | 1.956(2)   |
| Pd(1)-N(1)    | 2.0035(19) |
| Pd(1)-O(2)#1  | 2.0465(15) |
| Pd(1)-O(1)    | 2.1493(15) |
| Pd(1)-Pd(1)#1 | 2.8232(4)  |
| O(1)-C(14)    | 1.248(3)   |
| O(3)-C(12)    | 1.237(3)   |
| O(4)-N(2)     | 1.392(2)   |
| O(4)-C(13)    | 1.423(3)   |

|            |          |
|------------|----------|
| O(5)-C(16) | 1.195(3) |
| O(6)-C(16) | 1.321(3) |
| O(6)-H(6A) | 0.8400   |
| N(1)-C(1)  | 1.349(3) |
| N(1)-C(5)  | 1.356(3) |
| N(2)-C(12) | 1.340(3) |
| N(2)-H(2)  | 0.8800   |
| C(1)-C(2)  | 1.376(3) |
| C(1)-H(1)  | 0.9500   |
| C(2)-C(3)  | 1.379(3) |
| C(2)-H(2A) | 0.9500   |
| C(3)-C(4)  | 1.379(3) |
| C(3)-H(3)  | 0.9500   |
| C(4)-C(5)  | 1.387(3) |
| C(4)-H(4)  | 0.9500   |
| C(5)-C(6)  | 1.467(3) |
| C(6)-C(7)  | 1.387(3) |
| C(6)-C(11) | 1.407(3) |
| C(7)-C(8)  | 1.391(3) |
| C(7)-H(7)  | 0.9500   |
| C(8)-C(9)  | 1.393(3) |
| C(8)-H(8)  | 0.9500   |
| C(9)-C(10) | 1.390(3) |

|                     |            |
|---------------------|------------|
| C(9)-C(12)          | 1.495(3)   |
| C(10)-C(11)         | 1.392(3)   |
| C(10)-H(10)         | 0.9500     |
| C(13)-H(13A)        | 0.9800     |
| C(13)-H(13B)        | 0.9800     |
| C(13)-H(13C)        | 0.9800     |
| C(14)-C(15)         | 1.501(3)   |
| C(15)-H(15A)        | 0.9800     |
| C(15)-H(15B)        | 0.9800     |
| C(15)-H(15C)        | 0.9800     |
| C(16)-C(17)         | 1.501(4)   |
| C(17)-H(17A)        | 0.9800     |
| C(17)-H(17B)        | 0.9800     |
| C(17)-H(17C)        | 0.9800     |
| C(14)-O(2)-Pd(1)#1  | 122.29(14) |
| C(11)-Pd(1)-N(1)    | 81.40(8)   |
| C(11)-Pd(1)-O(2)#1  | 94.37(8)   |
| N(1)-Pd(1)-O(2)#1   | 174.81(7)  |
| C(11)-Pd(1)-O(1)    | 177.92(8)  |
| N(1)-Pd(1)-O(1)     | 96.95(7)   |
| O(2)#1-Pd(1)-O(1)   | 87.34(6)   |
| C(11)-Pd(1)-Pd(1)#1 | 103.41(7)  |

|                      |            |
|----------------------|------------|
| N(1)-Pd(1)-Pd(1)#1   | 94.40(5)   |
| O(2)#1-Pd(1)-Pd(1)#1 | 83.61(4)   |
| O(1)-Pd(1)-Pd(1)#1   | 77.93(4)   |
| C(14)-O(1)-Pd(1)     | 123.72(14) |
| N(2)-O(4)-C(13)      | 110.11(18) |
| C(16)-O(6)-H(6A)     | 109.5      |
| C(1)-N(1)-C(5)       | 120.1(2)   |
| C(1)-N(1)-Pd(1)      | 123.08(16) |
| C(5)-N(1)-Pd(1)      | 116.01(14) |
| C(12)-N(2)-O(4)      | 119.24(19) |
| C(12)-N(2)-H(2)      | 120.4      |
| O(4)-N(2)-H(2)       | 120.4      |
| N(1)-C(1)-C(2)       | 121.4(2)   |
| N(1)-C(1)-H(1)       | 119.3      |
| C(2)-C(1)-H(1)       | 119.3      |
| C(1)-C(2)-C(3)       | 119.1(2)   |
| C(1)-C(2)-H(2A)      | 120.5      |
| C(3)-C(2)-H(2A)      | 120.5      |
| C(4)-C(3)-C(2)       | 119.6(2)   |
| C(4)-C(3)-H(3)       | 120.2      |
| C(2)-C(3)-H(3)       | 120.2      |
| C(3)-C(4)-C(5)       | 119.7(2)   |
| C(3)-C(4)-H(4)       | 120.2      |



|                   |            |
|-------------------|------------|
| C(5)-C(4)-H(4)    | 120.2      |
| N(1)-C(5)-C(4)    | 120.1(2)   |
| N(1)-C(5)-C(6)    | 112.7(2)   |
| C(4)-C(5)-C(6)    | 127.1(2)   |
| C(7)-C(6)-C(11)   | 120.8(2)   |
| C(7)-C(6)-C(5)    | 124.4(2)   |
| C(11)-C(6)-C(5)   | 114.8(2)   |
| C(6)-C(7)-C(8)    | 120.1(2)   |
| C(6)-C(7)-H(7)    | 119.9      |
| C(8)-C(7)-H(7)    | 119.9      |
| C(7)-C(8)-C(9)    | 119.3(2)   |
| C(7)-C(8)-H(8)    | 120.3      |
| C(9)-C(8)-H(8)    | 120.3      |
| C(10)-C(9)-C(8)   | 120.8(2)   |
| C(10)-C(9)-C(12)  | 117.3(2)   |
| C(8)-C(9)-C(12)   | 121.9(2)   |
| C(9)-C(10)-C(11)  | 120.2(2)   |
| C(9)-C(10)-H(10)  | 119.9      |
| C(11)-C(10)-H(10) | 119.9      |
| C(10)-C(11)-C(6)  | 118.8(2)   |
| C(10)-C(11)-Pd(1) | 126.59(17) |
| C(6)-C(11)-Pd(1)  | 114.54(15) |
| O(3)-C(12)-N(2)   | 122.4(2)   |

|                     |          |
|---------------------|----------|
| O(3)-C(12)-C(9)     | 123.3(2) |
| N(2)-C(12)-C(9)     | 114.2(2) |
| O(4)-C(13)-H(13A)   | 109.5    |
| O(4)-C(13)-H(13B)   | 109.5    |
| H(13A)-C(13)-H(13B) | 109.5    |
| O(4)-C(13)-H(13C)   | 109.5    |
| H(13A)-C(13)-H(13C) | 109.5    |
| H(13B)-C(13)-H(13C) | 109.5    |
| O(1)-C(14)-O(2)     | 124.9(2) |
| O(1)-C(14)-C(15)    | 119.2(2) |
| O(2)-C(14)-C(15)    | 115.9(2) |
| C(14)-C(15)-H(15A)  | 109.5    |
| C(14)-C(15)-H(15B)  | 109.5    |
| H(15A)-C(15)-H(15B) | 109.5    |
| C(14)-C(15)-H(15C)  | 109.5    |
| H(15A)-C(15)-H(15C) | 109.5    |
| H(15B)-C(15)-H(15C) | 109.5    |
| O(5)-C(16)-O(6)     | 123.3(3) |
| O(5)-C(16)-C(17)    | 124.4(3) |
| O(6)-C(16)-C(17)    | 112.2(2) |
| C(16)-C(17)-H(17A)  | 109.5    |
| C(16)-C(17)-H(17B)  | 109.5    |
| H(17A)-C(17)-H(17B) | 109.5    |

|                     |       |
|---------------------|-------|
| C(16)-C(17)-H(17C)  | 109.5 |
| H(17A)-C(17)-H(17C) | 109.5 |
| H(17B)-C(17)-H(17C) | 109.5 |

---

Symmetry transformations used to generate equivalent atoms:

#1 -x,y,-z+3/2

Table 4. Anisotropic displacement parameters ( $\text{\AA}^2 \times 10^3$ ) for mo\_dm14259\_0m. The anisotropic displacement factor exponent takes the form:  $-2\pi^2 [ h^2 a^{*2} U^{11} + \dots + 2 h k a^* b^* U^{12} ]$

---

|       | $U^{11}$ | $U^{22}$ | $U^{33}$ | $U^{23}$ | $U^{13}$ | $U^{12}$ |
|-------|----------|----------|----------|----------|----------|----------|
| O(2)  | 18(1)    | 15(1)    | 24(1)    | 1(1)     | 4(1)     | 1(1)     |
| Pd(1) | 13(1)    | 14(1)    | 19(1)    | -1(1)    | 4(1)     | 0(1)     |
| O(1)  | 18(1)    | 20(1)    | 22(1)    | 2(1)     | 2(1)     | 3(1)     |
| O(3)  | 19(1)    | 27(1)    | 40(1)    | -13(1)   | 3(1)     | 2(1)     |
| O(4)  | 14(1)    | 25(1)    | 29(1)    | 1(1)     | 1(1)     | 0(1)     |
| O(5)  | 47(1)    | 40(1)    | 68(2)    | -15(1)   | 11(1)    | -15(1)   |
| O(6)  | 38(1)    | 35(1)    | 40(1)    | 2(1)     | 12(1)    | -14(1)   |
| N(1)  | 18(1)    | 19(1)    | 18(1)    | -3(1)    | 4(1)     | -1(1)    |
| N(2)  | 12(1)    | 24(1)    | 29(1)    | -6(1)    | 1(1)     | 1(1)     |
| C(1)  | 19(1)    | 24(1)    | 22(1)    | -2(1)    | 2(1)     | 1(1)     |
| C(2)  | 20(1)    | 29(1)    | 28(1)    | -5(1)    | 3(1)     | -4(1)    |

|       |       |       |       |       |       |       |
|-------|-------|-------|-------|-------|-------|-------|
| C(3)  | 24(1) | 21(1) | 33(1) | -6(1) | 7(1)  | -6(1) |
| C(4)  | 23(1) | 18(1) | 32(1) | -5(1) | 7(1)  | 0(1)  |
| C(5)  | 19(1) | 20(1) | 21(1) | -3(1) | 8(1)  | 1(1)  |
| C(6)  | 15(1) | 19(1) | 22(1) | -3(1) | 6(1)  | 0(1)  |
| C(7)  | 20(1) | 16(1) | 34(1) | -3(1) | 9(1)  | 0(1)  |
| C(8)  | 16(1) | 20(1) | 31(1) | 1(1)  | 4(1)  | 5(1)  |
| C(9)  | 15(1) | 21(1) | 25(1) | -2(1) | 6(1)  | 0(1)  |
| C(10) | 18(1) | 16(1) | 24(1) | -2(1) | 6(1)  | 0(1)  |
| C(11) | 15(1) | 17(1) | 21(1) | 1(1)  | 7(1)  | 1(1)  |
| C(12) | 17(1) | 21(1) | 26(1) | 2(1)  | 5(1)  | 3(1)  |
| C(13) | 29(1) | 43(2) | 29(1) | 2(1)  | 0(1)  | 7(1)  |
| C(14) | 13(1) | 15(1) | 25(1) | 0(1)  | 1(1)  | -2(1) |
| C(15) | 26(1) | 24(1) | 31(1) | 8(1)  | 6(1)  | 8(1)  |
| C(16) | 23(1) | 32(1) | 32(1) | 7(1)  | -5(1) | -2(1) |
| C(17) | 34(2) | 51(2) | 35(2) | 6(1)  | 5(1)  | -5(1) |

---

Table 5. Hydrogen coordinates ( $\times 10^4$ ) and isotropic displacement parameters ( $\text{\AA}^2 \times 10^{-3}$ )

for mo\_dm14259\_0m.

---

|  | x | y | z | U(eq) |
|--|---|---|---|-------|
|--|---|---|---|-------|

---

|        |       |       |      |    |
|--------|-------|-------|------|----|
| H(6A)  | 2743  | 9398  | 4465 | 56 |
| H(2)   | 3932  | 7952  | 8218 | 27 |
| H(1)   | -1102 | 9414  | 5927 | 27 |
| H(2A)  | -1675 | 7576  | 5572 | 32 |
| H(3)   | -948  | 5851  | 5973 | 31 |
| H(4)   | 352   | 6004  | 6694 | 29 |
| H(7)   | 1618  | 6408  | 7399 | 27 |
| H(8)   | 2840  | 6980  | 8176 | 27 |
| H(10)  | 2144  | 10426 | 7964 | 23 |
| H(13A) | 4978  | 7606  | 9556 | 53 |
| H(13B) | 4639  | 8751  | 9865 | 53 |
| H(13C) | 5533  | 8731  | 9832 | 53 |
| H(15A) | -1550 | 13011 | 5942 | 41 |
| H(15B) | -1103 | 13810 | 6628 | 41 |
| H(15C) | -1898 | 13134 | 6632 | 41 |
| H(17A) | 1554  | 9421  | 5856 | 62 |
| H(17B) | 1796  | 8181  | 5569 | 62 |
| H(17C) | 1123  | 8978  | 5043 | 62 |

---

Table 6. Torsion angles [°] for mo\_dm14259\_0m.

---

|                        |            |
|------------------------|------------|
| C(11)-Pd(1)-O(1)-C(14) | 157(2)     |
| N(1)-Pd(1)-O(1)-C(14)  | 119.22(18) |

|                          |             |
|--------------------------|-------------|
| O(2)#1-Pd(1)-O(1)-C(14)  | -57.85(17)  |
| Pd(1)#1-Pd(1)-O(1)-C(14) | 26.18(16)   |
| C(11)-Pd(1)-N(1)-C(1)    | 176.5(2)    |
| O(2)#1-Pd(1)-N(1)-C(1)   | 140.8(7)    |
| O(1)-Pd(1)-N(1)-C(1)     | -4.77(19)   |
| Pd(1)#1-Pd(1)-N(1)-C(1)  | 73.59(18)   |
| C(11)-Pd(1)-N(1)-C(5)    | 7.00(16)    |
| O(2)#1-Pd(1)-N(1)-C(5)   | -28.7(8)    |
| O(1)-Pd(1)-N(1)-C(5)     | -174.27(16) |
| Pd(1)#1-Pd(1)-N(1)-C(5)  | -95.92(16)  |
| C(13)-O(4)-N(2)-C(12)    | 85.6(3)     |
| C(5)-N(1)-C(1)-C(2)      | -0.3(3)     |
| Pd(1)-N(1)-C(1)-C(2)     | -169.42(18) |
| N(1)-C(1)-C(2)-C(3)      | 0.7(4)      |
| C(1)-C(2)-C(3)-C(4)      | -0.9(4)     |
| C(2)-C(3)-C(4)-C(5)      | 0.8(4)      |
| C(1)-N(1)-C(5)-C(4)      | 0.2(3)      |
| Pd(1)-N(1)-C(5)-C(4)     | 170.05(18)  |
| C(1)-N(1)-C(5)-C(6)      | -177.4(2)   |
| Pd(1)-N(1)-C(5)-C(6)     | -7.6(2)     |
| C(3)-C(4)-C(5)-N(1)      | -0.4(4)     |
| C(3)-C(4)-C(5)-C(6)      | 176.8(2)    |
| N(1)-C(5)-C(6)-C(7)      | -178.5(2)   |

|                           |             |
|---------------------------|-------------|
| C(4)-C(5)-C(6)-C(7)       | 4.1(4)      |
| N(1)-C(5)-C(6)-C(11)      | 3.6(3)      |
| C(4)-C(5)-C(6)-C(11)      | -173.8(2)   |
| C(11)-C(6)-C(7)-C(8)      | -1.0(3)     |
| C(5)-C(6)-C(7)-C(8)       | -178.8(2)   |
| C(6)-C(7)-C(8)-C(9)       | -0.3(4)     |
| C(7)-C(8)-C(9)-C(10)      | 1.7(4)      |
| C(7)-C(8)-C(9)-C(12)      | -178.0(2)   |
| C(8)-C(9)-C(10)-C(11)     | -1.8(3)     |
| C(12)-C(9)-C(10)-C(11)    | 177.8(2)    |
| C(9)-C(10)-C(11)-C(6)     | 0.6(3)      |
| C(9)-C(10)-C(11)-Pd(1)    | 176.88(17)  |
| C(7)-C(6)-C(11)-C(10)     | 0.8(3)      |
| C(5)-C(6)-C(11)-C(10)     | 178.8(2)    |
| C(7)-C(6)-C(11)-Pd(1)     | -175.92(18) |
| C(5)-C(6)-C(11)-Pd(1)     | 2.1(3)      |
| N(1)-Pd(1)-C(11)-C(10)    | 178.8(2)    |
| O(2)#1-Pd(1)-C(11)-C(10)  | -4.2(2)     |
| O(1)-Pd(1)-C(11)-C(10)    | 141(2)      |
| Pd(1)#1-Pd(1)-C(11)-C(10) | -88.7(2)    |
| N(1)-Pd(1)-C(11)-C(6)     | -4.73(16)   |
| O(2)#1-Pd(1)-C(11)-C(6)   | 172.24(16)  |
| O(1)-Pd(1)-C(11)-C(6)     | -42(2)      |

|                          |            |
|--------------------------|------------|
| Pd(1)#1-Pd(1)-C(11)-C(6) | 87.78(16)  |
| O(4)-N(2)-C(12)-O(3)     | -2.9(4)    |
| O(4)-N(2)-C(12)-C(9)     | 174.58(19) |
| C(10)-C(9)-C(12)-O(3)    | 34.9(3)    |
| C(8)-C(9)-C(12)-O(3)     | -145.5(3)  |
| C(10)-C(9)-C(12)-N(2)    | -142.6(2)  |
| C(8)-C(9)-C(12)-N(2)     | 37.0(3)    |
| Pd(1)-O(1)-C(14)-O(2)    | -21.1(3)   |
| Pd(1)-O(1)-C(14)-C(15)   | 157.88(16) |
| Pd(1)#1-O(2)-C(14)-O(1)  | -5.7(3)    |
| Pd(1)#1-O(2)-C(14)-C(15) | 175.23(14) |

---

Symmetry transformations used to generate equivalent atoms:

#1 -x,y,-z+3/2

Table 7. Hydrogen bonds for mo\_dm14259\_0m [Å and °].

---

| D-H...A             | d(D-H) | d(H...A) | d(D...A) | <(DHA) |
|---------------------|--------|----------|----------|--------|
| N(2)-H(2)...O(2)#2  | 0.88   | 1.95     | 2.801(3) | 161.3  |
| C(1)-H(1)...O(1)    | 0.95   | 2.58     | 3.166(3) | 120.5  |
| C(2)-H(2A)...O(5)#3 | 0.95   | 2.66     | 3.265(3) | 122.2  |
| C(4)-H(4)...O(4)#4  | 0.95   | 2.52     | 3.219(3) | 130.5  |



---

Symmetry transformations used to generate equivalent atoms:

#1  $-x, y, -z+3/2$     #2  $x+1/2, y-1/2, z$     #3  $x-1/2, y-1/2, z$

#4  $-x+1/2, y-1/2, -z+3/2$

### 6.3 X-ray Crystallographic Data of Compound 3a

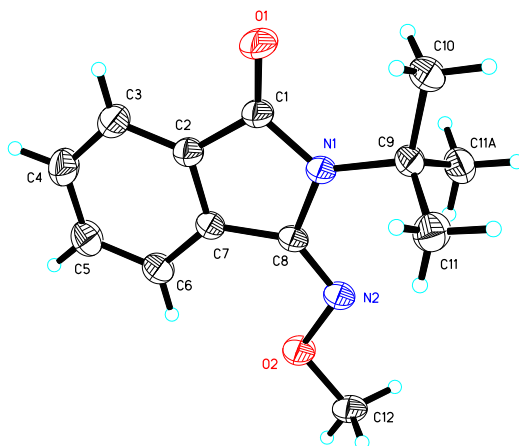

**3a**

Table 1. Crystal data and structure refinement for cd213442.

|                             |                                                                                                                      |
|-----------------------------|----------------------------------------------------------------------------------------------------------------------|
| Identification code         | cd213442                                                                                                             |
| Empirical formula           | C <sub>13</sub> H <sub>16</sub> N <sub>2</sub> O <sub>2</sub>                                                        |
| Formula weight              | 232.28                                                                                                               |
| Temperature                 | 293 (2) K                                                                                                            |
| Wavelength                  | 0.71073 Å                                                                                                            |
| Crystal system, space group | Monoclinic, P2(1)/m                                                                                                  |
| Unit cell dimensions        | a = 9.306(2) Å    alpha = 90 deg.<br>b = 7.1675(17) Å    beta = 110.334(4) deg.<br>c = 9.855(3) Å    gamma = 90 deg. |

|                                   |                                             |
|-----------------------------------|---------------------------------------------|
| Volume                            | 616.4(3) Å <sup>3</sup>                     |
| Z, Calculated density             | 2, 1.252 Mg/m <sup>3</sup>                  |
| Absorption coefficient            | 0.086 mm <sup>-1</sup>                      |
| F(000)                            | 248                                         |
| Crystal size                      | 0.25 x 0.20 x 0.16 mm                       |
| Theta range for data collection   | 2.59 to 28.31 deg.                          |
| Limiting indices                  | -12<=h<=10, -8<=k<=9, -7<=l<=13             |
| Reflections collected / unique    | 4212 / 1642 [R(int) = 0.0290]               |
| Completeness to theta = 28.31     | 99.1 %                                      |
| Absorption correction             | Semi-empirical from equivalents             |
| Max. and min. transmission        | 0.9864 and 0.9789                           |
| Refinement method                 | Full-matrix least-squares on F <sup>2</sup> |
| Data / restraints / parameters    | 1642 / 0 / 103                              |
| Goodness-of-fit on F <sup>2</sup> | 1.033                                       |
| Final R indices [I>2sigma(I)]     | R1 = 0.0511, wR2 = 0.1463                   |
| R indices (all data)              | R1 = 0.0666, wR2 = 0.1575                   |
| Largest diff. peak and hole       | 0.213 and -0.228 e.Å <sup>-3</sup>          |

Table 2. Atomic coordinates ( x 10<sup>4</sup>) and equivalent isotropic displacement parameters (Å<sup>2</sup> x 10<sup>3</sup>) for cd213442. U(eq) is defined as one third of the trace of the orthogonalized Uij tensor.

|      | x       | y    | z      | U(eq) |
|------|---------|------|--------|-------|
| O(1) | 5628(2) | 2500 | 123(2) | 75(1) |

|       |         |        |         |       |
|-------|---------|--------|---------|-------|
| O(2)  | 5149(2) | 2500   | 5700(1) | 59(1) |
| N(1)  | 4542(2) | 2500   | 1935(2) | 43(1) |
| N(2)  | 4274(2) | 2500   | 4217(2) | 47(1) |
| C(1)  | 5725(2) | 2500   | 1376(2) | 47(1) |
| C(2)  | 7166(2) | 2500   | 2636(2) | 45(1) |
| C(3)  | 8646(2) | 2500   | 2634(2) | 60(1) |
| C(4)  | 9820(2) | 2500   | 3959(3) | 68(1) |
| C(5)  | 9501(3) | 2500   | 5232(3) | 66(1) |
| C(6)  | 8018(2) | 2500   | 5231(2) | 54(1) |
| C(7)  | 6835(2) | 2500   | 3894(2) | 41(1) |
| C(8)  | 5155(2) | 2500   | 3469(2) | 40(1) |
| C(9)  | 2848(2) | 2500   | 1105(2) | 49(1) |
| C(10) | 2513(3) | 2500   | -525(2) | 70(1) |
| C(11) | 2166(2) | 730(2) | 1492(2) | 64(1) |
| C(12) | 4136(3) | 2500   | 6489(2) | 54(1) |

---

Table 3. Bond lengths [Å] and angles [deg] for cd213442.

|              |            |
|--------------|------------|
| O(1)-C(1)    | 1.208(2)   |
| O(2)-N(2)    | 1.4044(18) |
| O(2)-C(12)   | 1.415(2)   |
| N(1)-C(1)    | 1.391(2)   |
| N(1)-C(8)    | 1.418(2)   |
| N(1)-C(9)    | 1.503(2)   |
| N(2)-C(8)    | 1.279(2)   |
| C(1)-C(2)    | 1.478(3)   |
| C(2)-C(7)    | 1.377(2)   |
| C(2)-C(3)    | 1.377(3)   |
| C(3)-C(4)    | 1.381(3)   |
| C(3)-H(3)    | 0.9300     |
| C(4)-C(5)    | 1.386(3)   |
| C(4)-H(4)    | 0.9300     |
| C(5)-C(6)    | 1.380(3)   |
| C(5)-H(5)    | 0.9300     |
| C(6)-C(7)    | 1.393(3)   |
| C(6)-H(6)    | 0.9300     |
| C(7)-C(8)    | 1.472(3)   |
| C(9)-C(10)   | 1.526(3)   |
| C(9)-C(11)   | 1.5254(18) |
| C(9)-C(11)#1 | 1.5254(18) |
| C(10)-H(10A) | 0.9600     |
| C(10)-H(10B) | 0.9600     |
| C(10)-H(10C) | 0.9600     |
| C(11)-H(11A) | 0.9600     |

|                     |            |
|---------------------|------------|
| C(11)-H(11B)        | 0.9600     |
| C(11)-H(11C)        | 0.9600     |
| C(12)-H(12A)        | 0.9600     |
| C(12)-H(12B)        | 0.9600     |
| C(12)-H(12C)        | 0.9600     |
|                     |            |
| N(2)-O(2)-C(12)     | 108.43(14) |
| C(1)-N(1)-C(8)      | 109.96(14) |
| C(1)-N(1)-C(9)      | 127.51(15) |
| C(8)-N(1)-C(9)      | 122.53(14) |
| C(8)-N(2)-O(2)      | 110.11(14) |
| O(1)-C(1)-N(1)      | 128.13(18) |
| O(1)-C(1)-C(2)      | 125.63(18) |
| N(1)-C(1)-C(2)      | 106.25(15) |
| C(7)-C(2)-C(3)      | 122.53(18) |
| C(7)-C(2)-C(1)      | 109.52(16) |
| C(3)-C(2)-C(1)      | 127.95(18) |
| C(2)-C(3)-C(4)      | 117.5(2)   |
| C(2)-C(3)-H(3)      | 121.2      |
| C(4)-C(3)-H(3)      | 121.3      |
| C(3)-C(4)-C(5)      | 120.5(2)   |
| C(3)-C(4)-H(4)      | 119.8      |
| C(5)-C(4)-H(4)      | 119.8      |
| C(6)-C(5)-C(4)      | 121.9(2)   |
| C(6)-C(5)-H(5)      | 119.0      |
| C(4)-C(5)-H(5)      | 119.0      |
| C(5)-C(6)-C(7)      | 117.5(2)   |
| C(5)-C(6)-H(6)      | 121.3      |
| C(7)-C(6)-H(6)      | 121.3      |
| C(2)-C(7)-C(6)      | 120.09(18) |
| C(2)-C(7)-C(8)      | 106.97(15) |
| C(6)-C(7)-C(8)      | 132.94(17) |
| N(2)-C(8)-N(1)      | 120.88(15) |
| N(2)-C(8)-C(7)      | 131.82(16) |
| N(1)-C(8)-C(7)      | 107.30(14) |
| N(1)-C(9)-C(10)     | 111.42(16) |
| N(1)-C(9)-C(11)     | 108.22(10) |
| C(10)-C(9)-C(11)    | 108.23(11) |
| N(1)-C(9)-C(11)#1   | 108.22(10) |
| C(10)-C(9)-C(11)#1  | 108.23(11) |
| C(11)-C(9)-C(11)#1  | 112.56(17) |
| C(9)-C(10)-H(10A)   | 109.5      |
| C(9)-C(10)-H(10B)   | 109.5      |
| H(10A)-C(10)-H(10B) | 109.5      |
| C(9)-C(10)-H(10C)   | 109.5      |
| H(10A)-C(10)-H(10C) | 109.5      |
| H(10B)-C(10)-H(10C) | 109.5      |

|                     |       |
|---------------------|-------|
| C(9)-C(11)-H(11A)   | 109.5 |
| C(9)-C(11)-H(11B)   | 109.5 |
| H(11A)-C(11)-H(11B) | 109.5 |
| C(9)-C(11)-H(11C)   | 109.5 |
| H(11A)-C(11)-H(11C) | 109.5 |
| H(11B)-C(11)-H(11C) | 109.5 |
| O(2)-C(12)-H(12A)   | 109.5 |
| O(2)-C(12)-H(12B)   | 109.5 |
| H(12A)-C(12)-H(12B) | 109.5 |
| O(2)-C(12)-H(12C)   | 109.5 |
| H(12A)-C(12)-H(12C) | 109.5 |
| H(12B)-C(12)-H(12C) | 109.5 |

---

Symmetry transformations used to generate equivalent atoms:  
#1 x, -y+1/2, z

Table 4. Anisotropic displacement parameters ( $\text{\AA}^2 \times 10^3$ ) for cd213442. The anisotropic displacement factor exponent takes the form:  
 $-2 \pi^2 [ h^2 a^2 U11 + \dots + 2 h k a^* b^* U12 ]$

---

|       | U11   | U22    | U33   | U23   | U13   | U12    |
|-------|-------|--------|-------|-------|-------|--------|
| O(1)  | 60(1) | 132(1) | 35(1) | 0     | 21(1) | 0      |
| O(2)  | 54(1) | 92(1)  | 29(1) | 0     | 14(1) | 0      |
| N(1)  | 41(1) | 58(1)  | 30(1) | 0     | 11(1) | 0      |
| N(2)  | 49(1) | 60(1)  | 30(1) | 0     | 12(1) | 0      |
| C(1)  | 47(1) | 60(1)  | 36(1) | 0     | 17(1) | 0      |
| C(2)  | 45(1) | 49(1)  | 40(1) | 0     | 16(1) | 0      |
| C(3)  | 50(1) | 78(1)  | 57(1) | 0     | 23(1) | 0      |
| C(4)  | 42(1) | 90(2)  | 69(2) | 0     | 15(1) | 0      |
| C(5)  | 49(1) | 84(2)  | 54(1) | 0     | 3(1)  | 0      |
| C(6)  | 52(1) | 63(1)  | 42(1) | 0     | 10(1) | 0      |
| C(7)  | 43(1) | 40(1)  | 37(1) | 0     | 12(1) | 0      |
| C(8)  | 45(1) | 42(1)  | 30(1) | 0     | 11(1) | 0      |
| C(9)  | 39(1) | 68(1)  | 35(1) | 0     | 9(1)  | 0      |
| C(10) | 54(1) | 115(2) | 34(1) | 0     | 6(1)  | 0      |
| C(11) | 54(1) | 77(1)  | 57(1) | -7(1) | 14(1) | -15(1) |
| C(12) | 67(1) | 63(1)  | 36(1) | 0     | 24(1) | 0      |

---

Table 5. Hydrogen coordinates ( $\times 10^4$ ) and isotropic

displacement parameters ( $\text{\AA}^2 \times 10^3$ ) for cd213442.

|        | x     | y    | z     | U(eq) |
|--------|-------|------|-------|-------|
| H(3)   | 8846  | 2500 | 1773  | 72    |
| H(4)   | 10833 | 2500 | 3997  | 82    |
| H(5)   | 10310 | 2500 | 6112  | 79    |
| H(6)   | 7815  | 2500 | 6092  | 65    |
| H(10A) | 2865  | 1351 | -801  | 106   |
| H(10B) | 3033  | 3529 | -775  | 106   |
| H(10C) | 1429  | 2620 | -1024 | 106   |
| H(11A) | 2612  | -342 | 1208  | 96    |
| H(11B) | 1077  | 723  | 994   | 96    |
| H(11C) | 2379  | 695  | 2517  | 96    |
| H(12A) | 3657  | 1299 | 6408  | 81    |
| H(12B) | 3365  | 3438 | 6106  | 81    |
| H(12C) | 4700  | 2763 | 7489  | 81    |

Table 6. Torsion angles [deg] for cd213442.

|                      |       |
|----------------------|-------|
| C(12)-O(2)-N(2)-C(8) | 180.0 |
| C(8)-N(1)-C(1)-O(1)  | 180.0 |
| C(9)-N(1)-C(1)-O(1)  | 0.0   |
| C(8)-N(1)-C(1)-C(2)  | 0.0   |
| C(9)-N(1)-C(1)-C(2)  | 180.0 |
| O(1)-C(1)-C(2)-C(7)  | 180.0 |
| N(1)-C(1)-C(2)-C(7)  | 0.0   |
| O(1)-C(1)-C(2)-C(3)  | 0.0   |
| N(1)-C(1)-C(2)-C(3)  | 180.0 |
| C(7)-C(2)-C(3)-C(4)  | 0.0   |
| C(1)-C(2)-C(3)-C(4)  | 180.0 |
| C(2)-C(3)-C(4)-C(5)  | 0.0   |
| C(3)-C(4)-C(5)-C(6)  | 0.0   |
| C(4)-C(5)-C(6)-C(7)  | 0.0   |
| C(3)-C(2)-C(7)-C(6)  | 0.0   |
| C(1)-C(2)-C(7)-C(6)  | 180.0 |
| C(3)-C(2)-C(7)-C(8)  | 180.0 |
| C(1)-C(2)-C(7)-C(8)  | 0.0   |
| C(5)-C(6)-C(7)-C(2)  | 0.0   |
| C(5)-C(6)-C(7)-C(8)  | 180.0 |
| O(2)-N(2)-C(8)-N(1)  | 180.0 |
| O(2)-N(2)-C(8)-C(7)  | 0.0   |

|                            |             |
|----------------------------|-------------|
| C (1)-N (1)-C (8)-N (2)    | 180.0       |
| C (9)-N (1)-C (8)-N (2)    | 0.0         |
| C (1)-N (1)-C (8)-C (7)    | 0.0         |
| C (9)-N (1)-C (8)-C (7)    | 180.0       |
| C (2)-C (7)-C (8)-N (2)    | 180.0       |
| C (6)-C (7)-C (8)-N (2)    | 0.0         |
| C (2)-C (7)-C (8)-N (1)    | 0.0         |
| C (6)-C (7)-C (8)-N (1)    | 180.0       |
| C (1)-N (1)-C (9)-C (10)   | 0.0         |
| C (8)-N (1)-C (9)-C (10)   | 180.0       |
| C (1)-N (1)-C (9)-C (11)   | 118.87(11)  |
| C (8)-N (1)-C (9)-C (11)   | -61.13(11)  |
| C (1)-N (1)-C (9)-C (11)#1 | -118.88(11) |
| C (8)-N (1)-C (9)-C (11)#1 | 61.12(11)   |

Symmetry transformations used to generate equivalent atoms:

#1  $x, -y+1/2, z$

#### 6.4 X-ray Crystallographic Data of Compound 5i

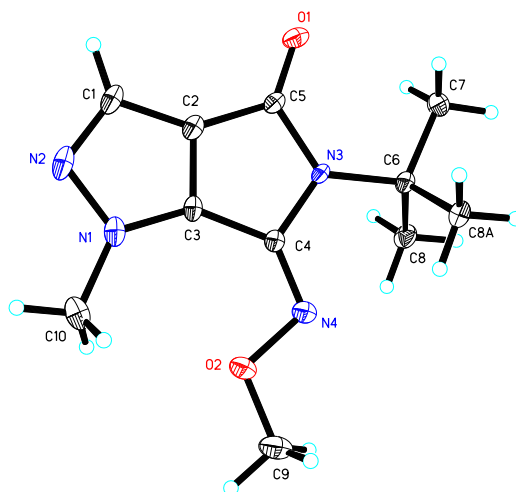

5i

Table 1. Crystal data and structure refinement for mo\_dm13420\_0m.

|                     |               |
|---------------------|---------------|
| Identification code | mo_dm13420_0m |
| Empirical formula   | C11 H16 N4 O2 |

|                                 |                                             |                       |
|---------------------------------|---------------------------------------------|-----------------------|
| Formula weight                  | 236.28                                      |                       |
| Temperature                     | 140(2) K                                    |                       |
| Wavelength                      | 0.71073 Å                                   |                       |
| Crystal system                  | Orthorhombic                                |                       |
| Space group                     | P m c 21                                    |                       |
| Unit cell dimensions            | a = 6.7109(16) Å                            | $\alpha = 90^\circ$ . |
|                                 | b = 10.133(3) Å                             | $\beta = 90^\circ$ .  |
|                                 | c = 18.129(4) Å                             | $\gamma = 90^\circ$ . |
| Volume                          | 1232.8(5) Å <sup>3</sup>                    |                       |
| Z                               | 4                                           |                       |
| Density (calculated)            | 1.273 Mg/m <sup>3</sup>                     |                       |
| Absorption coefficient          | 0.091 mm <sup>-1</sup>                      |                       |
| F(000)                          | 504                                         |                       |
| Crystal size                    | 0.200 x 0.150 x 0.100 mm <sup>3</sup>       |                       |
| Theta range for data collection | 2.010 to 30.563°.                           |                       |
| Index ranges                    | -9<=h<=9, -14<=k<=14, -25<=l<=24            |                       |
| Reflections collected           | 11716                                       |                       |
| Independent reflections         | 3642 [R(int) = 0.0538]                      |                       |
| Completeness to theta = 25.242° | 99.9 %                                      |                       |
| Absorption correction           | Semi-empirical from equivalents             |                       |
| Max. and min. transmission      | 0.7461 and 0.5572                           |                       |
| Refinement method               | Full-matrix least-squares on F <sup>2</sup> |                       |
| Data / restraints / parameters  | 3642 / 1 / 202                              |                       |



|                                      |                                       |
|--------------------------------------|---------------------------------------|
| Goodness-of-fit on $F^2$             | 1.011                                 |
| Final R indices [ $I > 2\sigma(I)$ ] | R1 = 0.0459, wR2 = 0.1035             |
| R indices (all data)                 | R1 = 0.0689, wR2 = 0.1179             |
| Absolute structure parameter         | -0.6(10)                              |
| Extinction coefficient               | n/a                                   |
| Largest diff. peak and hole          | 0.183 and -0.335 e. $\text{\AA}^{-3}$ |

Table 2. Atomic coordinates ( $\times 10^4$ ) and equivalent isotropic displacement parameters ( $\text{\AA}^2 \times 10^3$ ) for mo\_dm13420\_0m.  $U(\text{eq})$  is defined as one third of the trace of the orthogonalized  $U^{ij}$  tensor.

|      | x    | y       | z       | $U(\text{eq})$ |
|------|------|---------|---------|----------------|
| N(1) | 0    | 699(3)  | 1812(2) | 30(1)          |
| N(2) | 0    | -90(3)  | 1197(2) | 36(1)          |
| N(3) | 0    | 4171(2) | 1277(1) | 20(1)          |
| N(4) | 0    | 3778(3) | 2561(2) | 28(1)          |
| N(5) | 5000 | 799(3)  | 1654(2) | 31(1)          |
| N(6) | 5000 | 1654(3) | 2237(2) | 34(1)          |
| N(7) | 5000 | 2591(2) | -91(1)  | 22(1)          |
| N(8) | 5000 | 267(3)  | -202(2) | 34(1)          |
| O(1) | 0    | 3846(3) | -8(1)   | 32(1)          |
| O(2) | 0    | 2706(3) | 3054(1) | 41(1)          |
| O(3) | 5000 | 4735(2) | 408(1)  | 28(1)          |

|       |         |          |          |       |
|-------|---------|----------|----------|-------|
| O(4)  | 5000    | -868(3)  | 240(2)   | 54(1) |
| C(1)  | 0       | 719(3)   | 614(2)   | 30(1) |
| C(2)  | 0       | 2039(3)  | 859(2)   | 24(1) |
| C(3)  | 0       | 1984(3)  | 1604(2)  | 23(1) |
| C(4)  | 0       | 3326(3)  | 1903(2)  | 22(1) |
| C(5)  | 0       | 3426(3)  | 615(2)   | 22(1) |
| C(6)  | 0       | 5650(3)  | 1354(2)  | 24(1) |
| C(7)  | 0       | 6329(3)  | 599(2)   | 34(1) |
| C(8)  | 1885(4) | 6076(2)  | 1767(1)  | 31(1) |
| C(9)  | 0       | 3197(5)  | 3773(2)  | 60(1) |
| C(10) | 0       | 69(4)    | 2534(2)  | 44(1) |
| C(11) | 5000    | 2857(4)  | 1946(2)  | 29(1) |
| C(12) | 5000    | 2780(3)  | 1169(2)  | 22(1) |
| C(13) | 5000    | 1473(3)  | 1010(2)  | 24(1) |
| C(14) | 5000    | 1293(3)  | 210(2)   | 24(1) |
| C(15) | 5000    | 3547(3)  | 480(2)   | 21(1) |
| C(16) | 5000    | 2833(3)  | -910(2)  | 28(1) |
| C(17) | 3105(4) | 2228(3)  | -1239(2) | 40(1) |
| C(18) | 5000    | 4315(4)  | -1075(2) | 52(1) |
| C(19) | 5000    | -1985(4) | -220(4)  | 72(2) |
| C(20) | 5000    | -613(4)  | 1814(3)  | 48(1) |

Table 3. Bond lengths [Å] and angles [°] for mo\_dm13420\_0m.

---

|            |          |
|------------|----------|
| N(1)-C(3)  | 1.355(4) |
| N(1)-N(2)  | 1.371(4) |
| N(1)-C(10) | 1.458(5) |
| N(2)-C(1)  | 1.338(5) |
| N(3)-C(5)  | 1.418(4) |
| N(3)-C(4)  | 1.421(4) |
| N(3)-C(6)  | 1.505(4) |
| N(4)-C(4)  | 1.278(4) |
| N(4)-O(2)  | 1.407(3) |
| N(5)-C(13) | 1.351(4) |
| N(5)-N(6)  | 1.368(4) |
| N(5)-C(20) | 1.459(4) |
| N(6)-C(11) | 1.328(5) |
| N(7)-C(15) | 1.418(4) |
| N(7)-C(14) | 1.423(4) |
| N(7)-C(16) | 1.504(4) |
| N(8)-C(14) | 1.280(5) |
| N(8)-O(4)  | 1.401(4) |
| O(1)-C(5)  | 1.206(4) |
| O(2)-C(9)  | 1.395(5) |
| O(3)-C(15) | 1.211(4) |

|              |          |
|--------------|----------|
| O(4)-C(19)   | 1.406(6) |
| C(1)-C(2)    | 1.409(4) |
| C(1)-H(1)    | 0.9500   |
| C(2)-C(3)    | 1.352(4) |
| C(2)-C(5)    | 1.473(5) |
| C(3)-C(4)    | 1.464(4) |
| C(6)-C(8)#1  | 1.532(3) |
| C(6)-C(8)    | 1.532(3) |
| C(6)-C(7)    | 1.532(4) |
| C(7)-H(7A)   | 0.9800   |
| C(7)-H(7B)   | 0.9800   |
| C(7)-H(7C)   | 0.9800   |
| C(8)-H(8A)   | 0.9800   |
| C(8)-H(8B)   | 0.9800   |
| C(8)-H(8C)   | 0.9800   |
| C(9)-H(9A)   | 0.9800   |
| C(9)-H(9B)   | 0.9800   |
| C(9)-H(9C)   | 0.9800   |
| C(10)-H(10A) | 0.9598   |
| C(10)-H(10B) | 0.9600   |
| C(10)-H(10C) | 0.9600   |
| C(11)-C(12)  | 1.411(5) |
| C(11)-H(11)  | 0.9500   |

|                 |          |
|-----------------|----------|
| C(12)-C(13)     | 1.355(4) |
| C(12)-C(15)     | 1.470(4) |
| C(13)-C(14)     | 1.463(5) |
| C(16)-C(18)     | 1.532(5) |
| C(16)-C(17)#2   | 1.533(3) |
| C(16)-C(17)     | 1.533(3) |
| C(17)-H(17A)    | 0.9800   |
| C(17)-H(17B)    | 0.9800   |
| C(17)-H(17C)    | 0.9800   |
| C(18)-H(18A)    | 0.9600   |
| C(18)-H(18B)    | 0.9600   |
| C(18)-H(18C)    | 0.9600   |
| C(19)-H(19A)    | 0.9599   |
| C(19)-H(19B)    | 0.9600   |
| C(19)-H(19C)    | 0.9600   |
| C(20)-H(20A)    | 0.9800   |
| C(20)-H(20B)    | 0.9800   |
| C(20)-H(20C)    | 0.9800   |
| C(3)-N(1)-N(2)  | 109.6(3) |
| C(3)-N(1)-C(10) | 132.1(3) |
| N(2)-N(1)-C(10) | 118.3(3) |
| C(1)-N(2)-N(1)  | 106.5(3) |

|                  |          |
|------------------|----------|
| C(5)-N(3)-C(4)   | 110.8(2) |
| C(5)-N(3)-C(6)   | 127.5(2) |
| C(4)-N(3)-C(6)   | 121.7(2) |
| C(4)-N(4)-O(2)   | 108.5(3) |
| C(13)-N(5)-N(6)  | 110.3(3) |
| C(13)-N(5)-C(20) | 131.8(3) |
| N(6)-N(5)-C(20)  | 117.9(3) |
| C(11)-N(6)-N(5)  | 105.9(3) |
| C(15)-N(7)-C(14) | 110.6(3) |
| C(15)-N(7)-C(16) | 127.5(2) |
| C(14)-N(7)-C(16) | 121.9(3) |
| C(14)-N(8)-O(4)  | 109.4(3) |
| C(9)-O(2)-N(4)   | 108.6(3) |
| N(8)-O(4)-C(19)  | 108.8(4) |
| N(2)-C(1)-C(2)   | 109.4(3) |
| N(2)-C(1)-H(1)   | 125.3    |
| C(2)-C(1)-H(1)   | 125.3    |
| C(3)-C(2)-C(1)   | 106.0(3) |
| C(3)-C(2)-C(5)   | 109.8(3) |
| C(1)-C(2)-C(5)   | 144.2(3) |
| C(2)-C(3)-N(1)   | 108.5(3) |
| C(2)-C(3)-C(4)   | 109.3(3) |
| N(1)-C(3)-C(4)   | 142.2(3) |

|                  |            |
|------------------|------------|
| N(4)-C(4)-N(3)   | 122.0(3)   |
| N(4)-C(4)-C(3)   | 132.7(3)   |
| N(3)-C(4)-C(3)   | 105.3(3)   |
| O(1)-C(5)-N(3)   | 127.1(3)   |
| O(1)-C(5)-C(2)   | 128.2(3)   |
| N(3)-C(5)-C(2)   | 104.7(3)   |
| N(3)-C(6)-C(8)#1 | 109.04(16) |
| N(3)-C(6)-C(8)   | 109.04(16) |
| C(8)#1-C(6)-C(8) | 111.3(3)   |
| N(3)-C(6)-C(7)   | 111.4(2)   |
| C(8)#1-C(6)-C(7) | 108.06(17) |
| C(8)-C(6)-C(7)   | 108.07(17) |
| C(6)-C(7)-H(7A)  | 109.5      |
| C(6)-C(7)-H(7B)  | 109.5      |
| H(7A)-C(7)-H(7B) | 109.5      |
| C(6)-C(7)-H(7C)  | 109.5      |
| H(7A)-C(7)-H(7C) | 109.5      |
| H(7B)-C(7)-H(7C) | 109.5      |
| C(6)-C(8)-H(8A)  | 109.5      |
| C(6)-C(8)-H(8B)  | 109.5      |
| H(8A)-C(8)-H(8B) | 109.5      |
| C(6)-C(8)-H(8C)  | 109.5      |
| H(8A)-C(8)-H(8C) | 109.5      |

|                     |          |
|---------------------|----------|
| H(8B)-C(8)-H(8C)    | 109.5    |
| O(2)-C(9)-H(9A)     | 109.5    |
| O(2)-C(9)-H(9B)     | 109.5    |
| H(9A)-C(9)-H(9B)    | 109.5    |
| O(2)-C(9)-H(9C)     | 109.5    |
| H(9A)-C(9)-H(9C)    | 109.5    |
| H(9B)-C(9)-H(9C)    | 109.5    |
| N(1)-C(10)-H(10A)   | 109.5    |
| N(1)-C(10)-H(10B)   | 109.5    |
| H(10A)-C(10)-H(10B) | 110.4    |
| N(1)-C(10)-H(10C)   | 109.5    |
| H(10A)-C(10)-H(10C) | 108.5    |
| H(10B)-C(10)-H(10C) | 109.5    |
| N(6)-C(11)-C(12)    | 110.3(3) |
| N(6)-C(11)-H(11)    | 124.9    |
| C(12)-C(11)-H(11)   | 124.9    |
| C(13)-C(12)-C(11)   | 105.4(3) |
| C(13)-C(12)-C(15)   | 109.7(3) |
| C(11)-C(12)-C(15)   | 144.9(3) |
| N(5)-C(13)-C(12)    | 108.2(3) |
| N(5)-C(13)-C(14)    | 142.4(3) |
| C(12)-C(13)-C(14)   | 109.4(3) |
| N(8)-C(14)-N(7)     | 121.8(3) |



|                     |            |
|---------------------|------------|
| N(8)-C(14)-C(13)    | 132.8(3)   |
| N(7)-C(14)-C(13)    | 105.3(3)   |
| O(3)-C(15)-N(7)     | 126.9(3)   |
| O(3)-C(15)-C(12)    | 128.1(3)   |
| N(7)-C(15)-C(12)    | 105.0(3)   |
| N(7)-C(16)-C(18)    | 110.7(3)   |
| N(7)-C(16)-C(17)#2  | 108.62(18) |
| C(18)-C(16)-C(17)#2 | 108.4(2)   |
| N(7)-C(16)-C(17)    | 108.62(18) |
| C(18)-C(16)-C(17)   | 108.4(2)   |
| C(17)#2-C(16)-C(17) | 112.1(3)   |
| C(16)-C(17)-H(17A)  | 109.5      |
| C(16)-C(17)-H(17B)  | 109.5      |
| H(17A)-C(17)-H(17B) | 109.5      |
| C(16)-C(17)-H(17C)  | 109.5      |
| H(17A)-C(17)-H(17C) | 109.5      |
| H(17B)-C(17)-H(17C) | 109.5      |
| C(16)-C(18)-H(18A)  | 109.5      |
| C(16)-C(18)-H(18B)  | 109.4      |
| H(18A)-C(18)-H(18B) | 109.5      |
| C(16)-C(18)-H(18C)  | 109.5      |
| H(18A)-C(18)-H(18C) | 109.5      |
| H(18B)-C(18)-H(18C) | 109.5      |

|                     |       |
|---------------------|-------|
| O(4)-C(19)-H(19A)   | 109.4 |
| O(4)-C(19)-H(19B)   | 109.5 |
| H(19A)-C(19)-H(19B) | 110.2 |
| O(4)-C(19)-H(19C)   | 109.5 |
| H(19A)-C(19)-H(19C) | 108.8 |
| H(19B)-C(19)-H(19C) | 109.5 |
| N(5)-C(20)-H(20A)   | 109.5 |
| N(5)-C(20)-H(20B)   | 109.5 |
| H(20A)-C(20)-H(20B) | 109.5 |
| N(5)-C(20)-H(20C)   | 109.5 |
| H(20A)-C(20)-H(20C) | 109.5 |
| H(20B)-C(20)-H(20C) | 109.5 |

---

Symmetry transformations used to generate equivalent atoms:

#1 -x,y,z    #2 -x+1,y,z

Table 4. Anisotropic displacement parameters ( $\text{\AA}^2 \times 10^3$ ) for mo\_dm13420\_0m. The anisotropic displacement factor exponent takes the form:  $-2\pi^2 [ h^2 a^{*2} U^{11} + \dots + 2 h k a^* b^* U^{12} ]$

---

| $U^{11}$  | $U^{22}$ | $U^{33}$ | $U^{23}$ | $U^{13}$ | $U^{12}$ |
|-----------|----------|----------|----------|----------|----------|
| N(1)29(1) | 20(1)    | 40(2)    | -1(1)    | 0        | 0        |
| N(2)33(1) | 21(1)    | 53(2)    | -12(1)   | 0        | 0        |

---

|            |       |       |        |       |       |
|------------|-------|-------|--------|-------|-------|
| N(3)26(1)  | 16(1) | 18(1) | -5(1)  | 0     | 0     |
| N(4)34(2)  | 28(1) | 22(1) | 2(1)   | 0     | 0     |
| N(5)27(1)  | 30(2) | 37(2) | 12(1)  | 0     | 0     |
| N(6)29(2)  | 45(2) | 29(2) | 10(1)  | 0     | 0     |
| N(7)26(1)  | 17(1) | 23(1) | -1(1)  | 0     | 0     |
| N(8)36(2)  | 20(1) | 48(2) | -6(1)  | 0     | 0     |
| O(1)42(1)  | 35(1) | 20(1) | -6(1)  | 0     | 0     |
| O(2)69(2)  | 31(1) | 23(1) | 6(1)   | 0     | 0     |
| O(3)38(1)  | 17(1) | 30(1) | -1(1)  | 0     | 0     |
| O(4)75(2)  | 17(1) | 72(2) | -1(1)  | 0     | 0     |
| C(1)26(2)  | 24(2) | 41(2) | -13(1) | 0     | 0     |
| C(2)20(2)  | 23(2) | 30(2) | -6(1)  | 0     | 0     |
| C(3)22(2)  | 16(1) | 31(2) | -2(1)  | 0     | 0     |
| C(4)22(1)  | 20(1) | 23(1) | -1(1)  | 0     | 0     |
| C(5)21(1)  | 23(2) | 22(1) | -6(1)  | 0     | 0     |
| C(6)31(2)  | 18(1) | 24(2) | -3(1)  | 0     | 0     |
| C(7)52(2)  | 21(2) | 28(2) | 5(1)   | 0     | 0     |
| C(8)36(1)  | 24(1) | 32(1) | -6(1)  | -2(1) | -5(1) |
| C(9)105(4) | 49(3) | 25(2) | 7(2)   | 0     | 0     |
| C(10)55(2) | 27(2) | 49(2) | 10(2)  | 0     | 0     |
| C(11)24(2) | 38(2) | 26(2) | 0(1)   | 0     | 0     |
| C(12)17(1) | 25(2) | 24(2) | 2(1)   | 0     | 0     |
| C(13)21(2) | 20(2) | 31(2) | 5(1)   | 0     | 0     |

|            |       |        |        |       |      |
|------------|-------|--------|--------|-------|------|
| C(14)21(2) | 19(1) | 32(2)  | 0(1)   | 0     | 0    |
| C(15)19(1) | 22(1) | 23(2)  | -3(1)  | 0     | 0    |
| C(16)35(2) | 27(2) | 22(1)  | -1(1)  | 0     | 0    |
| C(17)36(1) | 57(2) | 28(1)  | -9(1)  | -8(1) | 3(1) |
| C(18)95(3) | 36(2) | 24(2)  | 6(2)   | 0     | 0    |
| C(19)75(4) | 19(2) | 121(5) | -14(2) | 0     | 0    |
| C(20)44(2) | 32(2) | 68(3)  | 29(2)  | 0     | 0    |

---

Table 5. Hydrogen coordinates ( $\times 10^4$ ) and isotropic displacement parameters ( $\text{\AA}^2 \times 10^{-3}$ ) for mo\_dm13420\_0m.

---

|       | x     | y    | z    | U(eq) |
|-------|-------|------|------|-------|
| H(1)  | 0     | 446  | 113  | 36    |
| H(7A) | -16   | 7289 | 667  | 51    |
| H(7B) | -1184 | 6059 | 321  | 51    |
| H(7C) | 1200  | 6075 | 326  | 51    |
| H(8A) | 1888  | 5681 | 2261 | 46    |
| H(8B) | 1908  | 7040 | 1811 | 46    |
| H(8C) | 3063  | 5779 | 1495 | 46    |
| H(9A) | 935   | 3937 | 3808 | 89    |

|        |       |       |       |     |
|--------|-------|-------|-------|-----|
| H(9B)  | 407   | 2498  | 4115  | 89  |
| H(9C)  | -1343 | 3501  | 3901  | 89  |
| H(10A) | 0     | -872  | 2474  | 66  |
| H(10B) | -1154 | 346   | 2806  | 66  |
| H(10C) | 1181  | 318   | 2798  | 66  |
| H(11)  | 5000  | 3655  | 2221  | 35  |
| H(17A) | 3122  | 1270  | -1166 | 61  |
| H(17B) | 3048  | 2423  | -1768 | 61  |
| H(17C) | 1933  | 2604  | -994  | 61  |
| H(18A) | 4079  | 4753  | -752  | 78  |
| H(18B) | 4608  | 4456  | -1578 | 78  |
| H(18C) | 6314  | 4664  | -999  | 78  |
| H(19A) | 5000  | -2768 | 78    | 108 |
| H(19B) | 6158  | -1968 | -531  | 108 |
| H(19C) | 3822  | -1982 | -520  | 108 |
| H(20A) | 6059  | -1044 | 1530  | 72  |
| H(20B) | 3709  | -991  | 1676  | 72  |
| H(20C) | 5232  | -750  | 2342  | 72  |

---

Table 6. Torsion angles [°] for mo\_dm13420\_0m.

---

C(3)-N(1)-N(2)-C(1) 0.000(1)

|                       |            |
|-----------------------|------------|
| C(10)-N(1)-N(2)-C(1)  | 180.000(1) |
| C(13)-N(5)-N(6)-C(11) | 0.000(1)   |
| C(20)-N(5)-N(6)-C(11) | 180.000(1) |
| C(4)-N(4)-O(2)-C(9)   | 180.000(1) |
| C(14)-N(8)-O(4)-C(19) | 180.000(1) |
| N(1)-N(2)-C(1)-C(2)   | 0.000(1)   |
| N(2)-C(1)-C(2)-C(3)   | 0.000(1)   |
| N(2)-C(1)-C(2)-C(5)   | 180.000(1) |
| C(1)-C(2)-C(3)-N(1)   | 0.000(1)   |
| C(5)-C(2)-C(3)-N(1)   | 180.000(1) |
| C(1)-C(2)-C(3)-C(4)   | 180.000(1) |
| C(5)-C(2)-C(3)-C(4)   | 0.000(1)   |
| N(2)-N(1)-C(3)-C(2)   | 0.000(1)   |
| C(10)-N(1)-C(3)-C(2)  | 180.000(1) |
| N(2)-N(1)-C(3)-C(4)   | 180.000(1) |
| C(10)-N(1)-C(3)-C(4)  | 0.000(1)   |
| O(2)-N(4)-C(4)-N(3)   | 180.000(1) |
| O(2)-N(4)-C(4)-C(3)   | 0.000(1)   |
| C(5)-N(3)-C(4)-N(4)   | 180.000(1) |
| C(6)-N(3)-C(4)-N(4)   | 0.000(1)   |
| C(5)-N(3)-C(4)-C(3)   | 0.000(1)   |
| C(6)-N(3)-C(4)-C(3)   | 180.000(1) |
| C(2)-C(3)-C(4)-N(4)   | 180.000(1) |

|                        |             |
|------------------------|-------------|
| N(1)-C(3)-C(4)-N(4)    | 0.000(1)    |
| C(2)-C(3)-C(4)-N(3)    | 0.000(1)    |
| N(1)-C(3)-C(4)-N(3)    | 180.000(1)  |
| C(4)-N(3)-C(5)-O(1)    | 180.000(1)  |
| C(6)-N(3)-C(5)-O(1)    | 0.000(1)    |
| C(4)-N(3)-C(5)-C(2)    | 0.000(1)    |
| C(6)-N(3)-C(5)-C(2)    | 180.000(1)  |
| C(3)-C(2)-C(5)-O(1)    | 180.000(1)  |
| C(1)-C(2)-C(5)-O(1)    | 0.000(1)    |
| C(3)-C(2)-C(5)-N(3)    | 0.000(1)    |
| C(1)-C(2)-C(5)-N(3)    | 180.000(1)  |
| C(5)-N(3)-C(6)-C(8)#1  | 119.16(18)  |
| C(4)-N(3)-C(6)-C(8)#1  | -60.84(18)  |
| C(5)-N(3)-C(6)-C(8)    | -119.17(18) |
| C(4)-N(3)-C(6)-C(8)    | 60.83(18)   |
| C(5)-N(3)-C(6)-C(7)    | 0.000(1)    |
| C(4)-N(3)-C(6)-C(7)    | 180.000(1)  |
| N(5)-N(6)-C(11)-C(12)  | 0.000(1)    |
| N(6)-C(11)-C(12)-C(13) | 0.000(1)    |
| N(6)-C(11)-C(12)-C(15) | 180.000(1)  |
| N(6)-N(5)-C(13)-C(12)  | 0.000(1)    |
| C(20)-N(5)-C(13)-C(12) | 180.000(1)  |
| N(6)-N(5)-C(13)-C(14)  | 180.000(1)  |

|                         |            |
|-------------------------|------------|
| C(20)-N(5)-C(13)-C(14)  | 0.000(1)   |
| C(11)-C(12)-C(13)-N(5)  | 0.000(1)   |
| C(15)-C(12)-C(13)-N(5)  | 180.000(1) |
| C(11)-C(12)-C(13)-C(14) | 180.000(1) |
| C(15)-C(12)-C(13)-C(14) | 0.000(1)   |
| O(4)-N(8)-C(14)-N(7)    | 180.000(1) |
| O(4)-N(8)-C(14)-C(13)   | 0.000(1)   |
| C(15)-N(7)-C(14)-N(8)   | 180.000(1) |
| C(16)-N(7)-C(14)-N(8)   | 0.000(1)   |
| C(15)-N(7)-C(14)-C(13)  | 0.000(1)   |
| C(16)-N(7)-C(14)-C(13)  | 180.000(1) |
| N(5)-C(13)-C(14)-N(8)   | 0.000(1)   |
| C(12)-C(13)-C(14)-N(8)  | 180.000(1) |
| N(5)-C(13)-C(14)-N(7)   | 180.000(1) |
| C(12)-C(13)-C(14)-N(7)  | 0.000(1)   |
| C(14)-N(7)-C(15)-O(3)   | 180.000(1) |
| C(16)-N(7)-C(15)-O(3)   | 0.000(1)   |
| C(14)-N(7)-C(15)-C(12)  | 0.000(1)   |
| C(16)-N(7)-C(15)-C(12)  | 180.000(1) |
| C(13)-C(12)-C(15)-O(3)  | 180.000(1) |
| C(11)-C(12)-C(15)-O(3)  | 0.000(1)   |
| C(13)-C(12)-C(15)-N(7)  | 0.000(1)   |
| C(11)-C(12)-C(15)-N(7)  | 180.000(1) |



|                          |             |
|--------------------------|-------------|
| C(15)-N(7)-C(16)-C(18)   | 0.000(1)    |
| C(14)-N(7)-C(16)-C(18)   | 180.000(1)  |
| C(15)-N(7)-C(16)-C(17)#2 | 118.91(19)  |
| C(14)-N(7)-C(16)-C(17)#2 | -61.09(19)  |
| C(15)-N(7)-C(16)-C(17)   | -118.91(19) |
| C(14)-N(7)-C(16)-C(17)   | 61.09(19)   |

---

Symmetry transformations used to generate equivalent atoms:

#1 -x,y,z    #2 -x+1,y,z

Table 7. Hydrogen bonds for mo\_dm13420\_0m [Å and °].

---

| D-H...A               | d(D-H) | d(H...A) | d(D...A) | <(DHA) |
|-----------------------|--------|----------|----------|--------|
| C(8)-H(8A)...N(4)     | 0.98   | 2.37     | 3.015(4) | 122.7  |
| C(8)-H(8C)...O(3)     | 0.98   | 2.59     | 3.505(3) | 156.2  |
| C(17)-H(17A)...N(8)   | 0.98   | 2.38     | 3.017(4) | 121.9  |
| C(17)-H(17C)...O(1)   | 0.98   | 2.54     | 3.466(3) | 157.0  |
| C(18)-H(18A)...O(3)   | 0.96   | 2.19     | 2.723(5) | 113.5  |
| C(19)-H(19A)...O(3)#3 | 0.96   | 2.60     | 3.513(6) | 159.1  |

---

Symmetry transformations used to generate equivalent atoms:

#1 -x,y,z    #2 -x+1,y,z    #3 x,y-1,z
